# Supplementary material
Source: Research Square preprint supplement (doi:10.21203/rs.3.rs-8969427/v1)
Supplement: Supplementary file 1 [file 0a4fbd1cca040d7ab30e3a70.xlsx]

## Sheet: Legend
	Supplementary Table 4 : Differentially expressed genes (DEGs) between WT vs. OX-1 and WT vs. alkbh10b under drought conditions
	Feature counts of WT, alkbh10b and OX-1 were compared under drought stress conditions and the DEGs were defined by Log2FC≥1 and ≤ -1; and FDR<0.05. DEGs btween WT vs. OX-1 and WT vs. alkbh10b are listed together with functional annotation. WT: wild-type, 10b-1:alkbh10b-1, and OX-1: 35S::ALKBH10B-1

## Sheet: WT vs. OX-1
Gene ID	Log2FC	FDR	Name & Function
AT1G16700	1.3233	0.0370477	NADH dehydrogenase [ubiquinone] iron-sulfur protein 8-B, mitochondrial
AT1G29100	1.6682	0.0461496	HEAVY METAL ASSOCIATED PROTEIN 7, Heavy metal transport/detoxification superfamily protein
AT1G36340	1.6682	0.0461496	Probable ubiquitin-conjugating enzyme E2 31
AT1G47260	1.18259	0.0342991	Gamma carbonic anhydrase 2, mitochondrial
AT1G47420	1.35571	0.0370477	Succinate dehydrogenase subunit 5, mitochondrial
AT1G49938	1.6682	0.0461496	hypothetical protein
AT1G51650	1.0827	0.033531	ATP synthase subunit epsilon, mitochondrial
AT1G70810	1.66292	0.0350283	Protein C2-DOMAIN ABA-RELATED 7
AT1G76770	1.6682	0.0461496	HSP20-like chaperones superfamily protein
AT2G08630	1.6682	0.0461496	N/A
AT2G18180	1.6682	0.0461496	Phosphatidylinositol_phosphatidylcholine transfer protein SFH10
AT2G30970	1.0567	0.033531	Aspartate aminotransferase, mitochondrial
AT2G42260	1.6682	0.0461496	Protein POLYCHOME
AT2G43745	1.6682	0.0461496	acalin lectin-like protein
AT3G03915	1.6682	0.0461496	N/A
AT3G04800	2.85095	0.0461496	Mitochondrial import inner membrane translocase subunit TIM23-3
AT3G06100	1.6682	0.0461496	Probable aquaporin NIP7-1
AT3G10860	1.43263	0.0461496	Cytochrome b-c1 complex subunit 8-1, mitochondrial
AT3G12775	1.6682	0.0461496	ubiquitin-conjugating enzyme family protein
AT3G26235	1.6682	0.0461496	hypothetical protein
AT3G27240	1.49079	0.0461496	Cytochrome c1 1, heme protein, mitochondrial
AT3G62400	1.16228	0.0461496	Cytochrome c oxidase subunit 5C-2
AT4G00860	1.05352	0.0342991	Arabidopsis thaliana ozone-induced protein 1
AT4G11170	2.72902	0.0446161	Putative disease resistance protein At4g11170
AT4G21105	1.04458	0.0461496	cytochrome-c oxidase/ electron carrier
AT4G32470	1.13134	0.0446161	Cytochrome b-c1 complex subunit 7-1, mitochondrial
AT4G38370	1.14827	0.0342991	Phosphoglycerate mutase family protein
AT5G02790	1.25631	0.0461496	Glutathione S-transferase L3
AT5G08680	1.06716	0.0461496	ATP synthase subunit beta-3, mitochondrial
AT5G15090	1.24823	0.0461496	Mitochondrial outer membrane protein porin 3
AT5G44572	1.53471	0.0446161	SCOOP (SERINE RICH ENDOGENOUS PEPTIDE) family member, involved in immunity against herbivorous insects
ATMG00516	1.24159	0.0446161	N/A
ATMG00860	2.85095	0.0461496	ORF158, DNA/RNA polymerases superfamily protein
ATMG01060	1.40761	0.0385789	hypothetical protein

## Sheet: WT vs. 10b-1
GeneID	Log2FC	FDR		Name /function
AT1G64795	8.85754	0.0438933		hypothetical protein
AT3G01345	7.9803	0.0358794		hypothetical protein
AT3G06955	-7.84382	0.0358794		Regulatory protein involved in ER-associated protein degradation (DERLIN-1)
AT4G29330	-3.86828	0.0358794		unknown
