# Supplementary material
Source: Research Square preprint supplement (doi:10.21203/rs.3.rs-8969427/v1)
Supplement: Supplementary file 2 [file 4c24f202e63681038cbeb657.xlsx]

## Sheet: Legend
	Supplementary Table S7: Expression of ABA- or JA-related genes across genotypes under drought.
	List of ABA and JA-related genes with their Log2FC in WT , alkbh10b-1 (10b-1) and 35S::ALKBH10B (OX-1) under drought vs. control conditions. UC: genes with unchanged expression compared to control.

## Sheet: ABA-related genes
Gene Name	Gene ID	Log2FC WT	Log2FC 10b-1	Log2FC OX-1
Biosynthesis
NCED3	AT3G14440	0.975937	0.67155	1.60089
NCED5	AT1G30100	UC	UC	UC
NCED6	AT1G78390	UC	UC	UC
AAO3	AT2G27150	UC	1.9096	1.29093
ABA2	AT1G52340	UC	UC	UC
Signalling
PYR1	AT4G17870	-0.950323	-1.44974	-1.18016
ABI1	AT4G26080	2.03465	2.34025	2.11419
ABI2	AT5G57050	4.55754	4.72206	4.30687
HAB1	AT1G72770	4.29951	4.41646	3.7736
HAB2	AT1G17550	1.82808	2.00431	1.51071
AHG1	AT5G51760	3.16488	4.77909	UC
SnRK2.2	AT3G50500	0.619282	0.773014	0.566006
SnRK2.3	AT5G66880	UC	UC	UC
SnRK2.6	AT4G33950	1.17355	1.26242	1.13179
CPK3	AT5G63680	UC	UC	UC
CPK4	AT4G09570	-0.510569	UC	UC
CPK6	AT2G17290	UC	UC	UC
CPK11	AT1G35670	-0.79622	-0.675038	UC
ABF1	AT1G49720	UC	0.800487	1.13937
ABF2	AT1G45249	3.44947	3.84895	3.87872
ABI5	AT2G36270	2.86247	3.59062	2.17773
AREB3	AT3G56850	1.03858	0.60591	UC
RD22	AT5G25610	2.09117	2.10021	1.70831
RD29A	AT5G52310	2.83649	3.44415	3.11782
RD29B	AT5G52300	8.79159	10.8596	8.43941
COR15A	AT2G42540	2.61531	3.56985	2.52628
COR15B	AT2G42530	-1.10197	-1.63713	UC
CER3	AT5G57800	-1.22045	-1.30353	UC
LEA76	AT3G15670	5.65234	7.23587	UC
ABF3	AT4G34000	2.16572	2.20821	2.34883
Storage
BG1	AT1G52400	1.55567	UC	UC
BG2	AT2G32860	0	UC	UC
UGT71B7	AT3G21790	1.13772	1.67657	1.22966
UGT71B8	AT3G21800	UC	UC	UC
Catabolism
CYP707A1	AT4G19230	2.59735	3.60627	UC
CYP707A2	AT2G29090	2.31661	2.73048	2.95872
CYP707A3	AT5G45340	-1.55271	UC	UC
CYP707A4	AT3G19270	UC	UC	UC
Stomatal aperture and density
TGG1	AT5G26000	-2.09925	-2.39409	-1.99226
TGG2	AT5G25980	-1.84737	-2.05127	-1.49485
TMM1	AT1G80080	-1.14908	-0.882686	-0.925115

## Sheet: JA-related genes
Gene Name	GeneID	Log2FC WT	Log2FC 10b-1	Log2FC OX-1
Biosynthesis
LOX2	AT3G45140	UC	-1.92756	UC
LOX3	AT1G17420	UC	-2.51469	-1.82489
AOS	AT5G42650	UC	UC	UC
AOC1	AT3G25760	UC	UC	UC
AOC2	AT3G25770	UC	UC	0.487404
AOC3	AT3G25780	UC	UC	UC
AOC4	AT1G13280	UC	0.607436	UC
JASSY	AT1G70480	0.466559	UC	UC
OPCL1	AT1G20510	-0.609081	UC	UC
OPR3	AT2G06050	-0.901109	UC	-0.828224
ACX1	AT4G16760	1.36795	1.32348	1.02828
JAR1	AT2G46370	UC	UC	UC
JMT	AT1G19640	UC	UC	UC
PXG3	AT2G33380	2.47681	2.44192	2.52596
Catabolism
SOT15	AT5G07010	UC	UC	UC
CYP94B3	AT3G48520	UC	UC	UC
CYP94C1	AT2G27690	-2.0142	UC	-2.34686
JOX3	AT3G55970	UC	1.39663	UC
CYP94B1	AT5G63450	UC	UC	-2.85371
IAR3	AT1G51760	-0.845048	UC	-1.30146
ILL6	AT1G44350	UC	UC	UC
Signalling
JAZ1	AT1G19180	UC	UC	UC
JAZ2	AT1G74950	UC	-1.02162	-1.00514
JAZ3	AT3G17860	-0.672702	-0.844241	UC
JAZ4	AT1G48500	3.4068	2.87968	2.86919
JAZ5	AT1G17380	UC	UC	UC
JAZ6	AT1G72450	-1.16574	-1.48348	UC
JAZ7	AT2G34600	UC	UC	UC
JAZ8	AT1G30135	UC	UC	UC
JAZ9	AT1G70700	-1.36224	-1.85024	-1.20839
JAZ10	AT5G13220	UC	-2.19136	-1.98606
JAZ11	AT3G43440	0.9465	1.08727	UC
JAZ12	AT5G20900	UC	0.500259	0.514627
JAZ13	AT3G22275	UC	UC	UC
MYC2	AT1G32640	UC	UC	UC
MYC3	AT5G46760	UC	0.704744	0.61679
MYC4	AT4G17880	UC	UC	UC
PDF1.2A	AT5G44420	UC	-5.60628	-8.20098
VSP2	AT5G24770	UC	UC	2.63186
VSP1	AT5G24780	UC	UC	UC
JAM1	AT2G46510	UC	UC	UC
CLH1	AT1G19670	-1.4814	-1.63302	-1.79036
CORI3	AT4G23600	2.71442	2.69026	2.26846
