# Supplementary material
Source: Research Square preprint supplement (doi:10.21203/rs.3.rs-8969427/v1)
Supplement: Supplementary file 3 [file 6b525c1a17a7faa222965a1b.xlsx]

## Sheet: Legend
	Supplementary Table S3: Differentially expressed genes (DEGs) in WT, alkbh10b-1 and OX-1 between drought and well-watered (control) conditions
	DEGs were identified based on adjusted FDR<0.05. DEGs with Log2FC ≥1 were considered up-regulated and with Log2FC≤ -1 were considered down-regulated. WT: wild-type, 10b-1 :alkbh10b-1 and OX-1 35S:ALKBH10B-1

## Sheet: DEGs WT 
GeneID	Log2FC	FDR
AT1G01060	1.12024	0.0309811
AT1G01080	-1.17741	0.00112768
AT1G01110	-1.54521	0.0185932
AT1G01120	-2.51883	0.0011132
AT1G01180	-1.14989	0.0390516
AT1G01190	-3.28806	0.0120655
AT1G01210	1.27779	0.00728087
AT1G01240	1.19363	0.00171717
AT1G01250	3.54561	0.00340306
AT1G01300	-1.77149	0.00383529
AT1G01340	-2.08637	0.0277313
AT1G01370	-2.79258	0.0135554
AT1G01390	-4.28565	0.00487502
AT1G01420	1.07338	0.0076629
AT1G01470	2.0935	0.0028802
AT1G01480	4.44246	0.0294541
AT1G01500	1.63833	0.000483222
AT1G01520	3.1874	0.00779682
AT1G01600	-4.85381	0.0046688
AT1G01620	-4.49735	0.000665518
AT1G01640	1.89696	0.00396265
AT1G01650	1.62085	0.00408316
AT1G01700	1.8244	0.00813785
AT1G01720	2.35353	0.00988273
AT1G01725	1.47522	0.00390662
AT1G01730	1.1822	0.00995128
AT1G01790	-2.56781	0.000888877
AT1G01900	-3.60174	0.0458591
AT1G02050	1.50374	0.0278461
AT1G02065	-1.13713	0.012128
AT1G02190	-1.9623	0.0206285
AT1G02270	1.11993	0.00722581
AT1G02305	1.42282	0.000543004
AT1G02310	7.17066	0.0105387
AT1G02340	-2.51611	0.00939809
AT1G02360	-7.38773	0.0065921
AT1G02370	1.58214	0.00927664
AT1G02380	-1.92621	0.00154976
AT1G02390	2.33245	0.00928954
AT1G02470	2.31332	0.0369036
AT1G02610	-1.55879	0.000686674
AT1G02630	-2.94445	0.0121767
AT1G02640	-5.6266	0.00186629
AT1G02650	-4.0211	0.00869006
AT1G02660	-1.20569	0.00268918
AT1G02730	-4.9414	0.00299493
AT1G02770	2.16892	0.0187531
AT1G02800	-3.74306	0.00779165
AT1G02810	-2.61465	0.00269844
AT1G02840	1.01808	0.0311544
AT1G02850	2.55213	0.000457203
AT1G02870	1.19598	0.00441672
AT1G03030	1.1614	0.00197914
AT1G03080	1.11146	0.003977
AT1G03106	1.75776	0.0294327
AT1G03130	-1.56728	0.00204975
AT1G03310	1.39325	0.000782277
AT1G03380	1.08537	0.00732455
AT1G03457	-3.97156	0.0109498
AT1G03530	1.28212	0.00400281
AT1G03550	2.86135	0.0117811
AT1G03660	-2.71073	0.0213415
AT1G03700	2.06473	0.00628572
AT1G03760	2.08691	0.00522483
AT1G03780	-2.95238	0.00732455
AT1G03850	-3.32361	0.0107954
AT1G03870	-6.43389	0.00122941
AT1G03940	1.58597	0.0463943
AT1G04020	-2.8391	0.0171632
AT1G04040	-2.12724	0.00263987
AT1G04103	2.60777	0.0209437
AT1G04110	-3.97426	0.00256036
AT1G04180	-3.02342	0.00762307
AT1G04217	2.33922	0.0246749
AT1G04220	2.75148	0.00219229
AT1G04223	-1.19442	0.0367845
AT1G04230	1.08863	0.0258096
AT1G04250	-2.17982	0.00058824
AT1G04310	1.11589	0.00152059
AT1G04425	-3.41146	0.0127263
AT1G04430	-1.30038	0.000367411
AT1G04520	-5.41093	0.000149107
AT1G04530	-1.89204	0.00128097
AT1G04560	5.90513	0.000942774
AT1G04570	5.26525	0.000186072
AT1G04660	-2.47639	0.0141684
AT1G04680	-4.41771	0.000635362
AT1G04710	1.01848	0.0141322
AT1G04730	-2.6875	0.00715282
AT1G04760	-2.67651	0.0390519
AT1G04800	-3.15441	0.000949744
AT1G04820	-2.20997	0.00165797
AT1G04830	1.96206	0.00102778
AT1G04840	2.54439	0.0347491
AT1G04945	1.65511	0.00788258
AT1G04990	1.05956	0.00538668
AT1G05010	-1.43412	0.0401954
AT1G05035	-2.77302	0.0437073
AT1G05060	2.02237	0.00486081
AT1G05100	3.35759	0.043338
AT1G05103	-2.5486	0.0273965
AT1G05150	-1.1585	0.00886685
AT1G05170	1.86417	0.0143143
AT1G05190	-1.11521	0.00961985
AT1G05210	-3.4675	0.00941072
AT1G05260	1.47331	0.0200394
AT1G05300	-2.1152	0.0225866
AT1G05330	3.14476	0.0234256
AT1G05340	5.72594	0.00131115
AT1G05400	1.64268	0.0468068
AT1G05440	-2.79631	0.0148177
AT1G05450	4.04188	0.00741827
AT1G05470	-2.23765	0.0216632
AT1G05510	2.70991	0.0268542
AT1G05575	-1.61242	0.0182414
AT1G05675	-4.14978	0.00263799
AT1G05690	1.84576	0.0222297
AT1G05805	-1.73812	0.00135993
AT1G05810	-2.10692	0.00862546
AT1G05850	-1.06488	0.0004952
AT1G05870	1.52497	0.000688706
AT1G05890	1.19672	0.00267112
AT1G05940	1.18562	0.00162378
AT1G06033	1.93849	0.023615
AT1G06080	-5.84101	0.00458486
AT1G06090	2.2187	0.0190139
AT1G06100	-3.63109	0.0166533
AT1G06110	1.78822	0.00253974
AT1G06160	-3.39404	0.0238579
AT1G06180	3.5115	0.000416092
AT1G06200	1.2332	0.00209719
AT1G06210	1.12569	0.00452304
AT1G06265	1.27743	0.0202764
AT1G06350	-3.73176	0.0102757
AT1G06360	-2.91941	0.0013469
AT1G06417	-1.99718	0.0249234
AT1G06430	1.27016	0.000435335
AT1G06450	1.79221	0.0149234
AT1G06463	-1.86103	0.0103704
AT1G06473	2.4935	0.00233528
AT1G06570	1.96851	0.00157429
AT1G06667	1.40103	0.0169024
AT1G06680	-1.89396	0.00172344
AT1G06710	2.43046	0.0183827
AT1G06720	1.43609	0.0031685
AT1G06733	2.9767	0.00242223
AT1G06757	1.98428	0.0176576
AT1G06780	1.36407	0.00295863
AT1G06810	-2.08382	0.00537724
AT1G06830	-3.57175	0.00961985
AT1G06850	-1.15155	0.0288169
AT1G06980	-1.13466	0.0483461
AT1G07000	-2.04136	0.00299329
AT1G07010	1.10724	0.00173865
AT1G07040	1.44716	0.00102556
AT1G07050	-2.70612	0.00569213
AT1G07135	-3.87052	0.00305937
AT1G07150	-4.03361	0.00844354
AT1G07160	-1.84026	0.00544767
AT1G07230	1.14567	0.00619899
AT1G07320	-1.75824	0.00148402
AT1G07350	1.92065	0.00113045
AT1G07370	-4.28685	0.00811019
AT1G07380	1.80559	0.00235052
AT1G07390	2.69131	0.0127438
AT1G07430	6.69122	0.000247059
AT1G07440	1.11767	0.00141542
AT1G07510	1.77304	0.000198781
AT1G07530	1.25273	0.00154976
AT1G07540	3.29051	0.00551849
AT1G07590	1.07253	0.00371298
AT1G07610	-1.08053	0.0212116
AT1G07615	1.29749	0.00593992
AT1G07720	1.75118	0.000491959
AT1G07750	1.37886	0.00208444
AT1G07810	1.05149	0.00363771
AT1G07830	1.75265	0.00183256
AT1G07840	1.0922	0.00497008
AT1G07870	1.67467	0.00225138
AT1G07880	-3.74582	0.00433367
AT1G07897	-1.84026	0.00544767
AT1G07900	3.56855	0.00872338
AT1G07910	1.25667	0.00172864
AT1G07957	3.35857	0.0305034
AT1G07985	5.64443	0.00108502
AT1G08040	1.23373	0.02387
AT1G08063	1.5088	0.0275133
AT1G08070	1.76877	0.0232547
AT1G08090	-3.04088	0.0336838
AT1G08110	1.48366	0.000280547
AT1G08160	-2.95535	0.00712393
AT1G08230	2.39066	0.000185766
AT1G08380	-1.70858	0.000431748
AT1G08400	1.59292	0.00596627
AT1G08410	1.01141	0.00769316
AT1G08460	1.4304	0.00257925
AT1G08507	1.00316	0.0348466
AT1G08510	-1.11645	0.00408918
AT1G08550	-1.17803	0.00479113
AT1G08570	1.50139	0.00145453
AT1G08573	2.81397	0.0204996
AT1G08630	2.79081	0.0387478
AT1G08640	1.34132	0.000678435
AT1G08643	-1.69278	0.00937735
AT1G08650	2.62649	0.000367411
AT1G08710	1.08518	0.020374
AT1G08890	1.56066	0.0063455
AT1G08920	1.49433	0.034158
AT1G08930	-2.31368	0.00132051
AT1G08950	1.57541	0.00137994
AT1G08980	-1.01087	0.00429336
AT1G09070	-1.14957	0.00593452
AT1G09080	-1.08324	0.0389747
AT1G09087	1.70609	0.025691
AT1G09100	1.0789	0.00280955
AT1G09140	1.82324	0.000479701
AT1G09190	1.15868	0.0403121
AT1G09200	-2.87188	0.000547296
AT1G09250	-2.33726	0.00200677
AT1G09290	1.81946	0.00918254
AT1G09340	-2.81906	0.00158592
AT1G09350	-1.03049	0.0234031
AT1G09390	-3.18845	0.00092466
AT1G09460	-2.88045	0.00269096
AT1G09470	-3.15291	0.021864
AT1G09500	4.25308	0.0363233
AT1G09520	1.06783	0.0171732
AT1G09530	2.56539	0.00368621
AT1G09533	2.03493	0.0266796
AT1G09687	1.27407	0.0209504
AT1G09693	2.32646	0.0273965
AT1G09697	3.42452	0.00438431
AT1G09740	1.02017	0.00330566
AT1G09750	-5.94823	0.000367411
AT1G09867	1.9853	0.035474
AT1G09870	1.21625	0.00505527
AT1G09932	-3.51208	0.0154101
AT1G09950	1.42091	0.0228482
AT1G10010	-1.84049	0.00520643
AT1G10020	-3.62369	0.000613148
AT1G10030	-1.51211	0.00162267
AT1G10040	1.78587	0.0115296
AT1G10060	-1.93874	0.0298654
AT1G10070	2.70412	0.00240247
AT1G10220	-2.3475	0.0389261
AT1G10340	-3.58804	0.0239966
AT1G10350	1.02102	0.00484944
AT1G10360	-1.72712	0.00361193
AT1G10410	1.16964	0.00526053
AT1G10450	1.13572	0.00920892
AT1G10460	-3.40274	0.0287175
AT1G10470	-2.2412	0.00036519
AT1G10480	1.24373	0.0247694
AT1G10550	-5.54251	0.00134675
AT1G10560	-1.46527	0.0259173
AT1G10580	1.00348	0.00154097
AT1G10640	-3.58781	0.002458
AT1G10657	-2.25011	0.00310152
AT1G10660	1.26474	0.00427609
AT1G10770	-3.97154	0.029222
AT1G10780	-2.07101	0.0187325
AT1G10810	1.19648	0.0436672
AT1G10850	-1.61469	0.00323608
AT1G10865	1.42695	0.0241583
AT1G10960	-1.57935	0.00268624
AT1G10980	-3.07691	0.0263952
AT1G11000	-1.87951	0.0269301
AT1G11080	-1.70395	0.0410512
AT1G11120	-2.61246	0.0131466
AT1G11125	-2.47012	0.00309076
AT1G11170	1.97352	0.00563292
AT1G11175	1.86386	0.00142431
AT1G11190	1.6373	0.0399896
AT1G11210	2.14427	0.00425606
AT1G11260	-4.26768	0.000457203
AT1G11300	2.13023	0.0135229
AT1G11303	-1.51253	0.0226281
AT1G11350	-1.13989	0.00759245
AT1G11362	-3.33603	0.00110764
AT1G11380	-2.20065	0.00388331
AT1G11410	1.27558	0.0389366
AT1G11450	-2.64811	0.0198021
AT1G11475	1.05183	0.00345794
AT1G11545	-5.51378	0.00591263
AT1G11600	-2.47011	0.0281476
AT1G11670	-3.12799	0.0129929
AT1G11700	1.81333	0.00138577
AT1G11710	1.33203	0.0363347
AT1G11730	-3.10916	0.0257167
AT1G11740	-3.50975	0.00543977
AT1G11785	2.21406	0.00294562
AT1G11820	-1.63684	0.00513966
AT1G11840	1.38894	0.00407336
AT1G11850	-4.48262	0.0004505
AT1G11860	-2.09308	0.00109192
AT1G11910	1.16066	0.00160211
AT1G11940	1.09212	0.0465835
AT1G12000	-1.68302	0.00117232
AT1G12013	1.98807	0.00221851
AT1G12020	-1.65005	0.0039561
AT1G12050	1.22903	0.00126365
AT1G12064	5.0526	0.000279579
AT1G12080	-4.47867	0.00157787
AT1G12090	-2.43882	0.000332122
AT1G12100	-2.3971	0.0231004
AT1G12110	-3.6775	0.000198781
AT1G12240	-1.53394	0.0107043
AT1G12400	1.32662	0.00147375
AT1G12460	-2.13718	0.040094
AT1G12500	-1.83331	0.000950863
AT1G12570	-4.50794	0.0102312
AT1G12672	2.67003	0.00058311
AT1G12710	-1.0204	0.00276496
AT1G12900	-1.96951	0.000367411
AT1G13090	1.35639	0.000781255
AT1G13100	-1.28574	0.00585229
AT1G13110	-1.49197	0.0035502
AT1G13195	1.19175	0.00147337
AT1G13210	-1.47727	0.0176719
AT1G13250	-1.81048	0.00124211
AT1G13260	-3.94942	0.000829103
AT1G13360	1.2504	0.00143998
AT1G13430	-2.79172	0.00903917
AT1G13470	-2.53125	0.00807789
AT1G13670	-2.50649	0.0109728
AT1G13790	-1.24157	0.0473938
AT1G13830	2.33675	0.00624571
AT1G13920	2.87179	0.00029622
AT1G13930	1.929	0.000535243
AT1G13950	1.07737	0.0131503
AT1G13960	1.34674	0.0112977
AT1G13990	1.48058	0.00327319
AT1G14150	-2.29411	0.00129978
AT1G14180	-2.30994	0.0217686
AT1G14250	-5.87192	0.0201478
AT1G14290	-3.31984	0.00091071
AT1G14345	-1.32397	0.00244304
AT1G14350	-1.70118	0.00273462
AT1G14430	-3.4816	0.032477
AT1G14455	3.04552	0.0259559
AT1G14460	-1.77042	0.023456
AT1G14520	1.31308	0.00489161
AT1G14540	-3.42682	0.0039683
AT1G14630	-2.01732	0.026789
AT1G14720	1.57672	0.000665518
AT1G14730	2.52523	0.00611589
AT1G14880	-6.08424	0.00784475
AT1G14900	-1.4269	0.00213619
AT1G14920	-1.24855	0.00259038
AT1G15100	2.01034	0.00367134
AT1G15175	-3.39706	0.00546977
AT1G15190	1.50211	0.0340967
AT1G15230	1.55527	0.000942774
AT1G15310	2.82738	0.00148679
AT1G15420	1.16145	0.00464028
AT1G15500	1.12052	0.000851166
AT1G15510	2.93107	0.0462104
AT1G15570	-2.25669	0.0186257
AT1G15760	-2.07369	0.030701
AT1G15820	-2.56341	0.0013469
AT1G15830	-5.01392	0.00765125
AT1G15940	1.1121	0.0132662
AT1G15960	2.0124	0.00879464
AT1G15980	-1.91828	0.00613777
AT1G16030	1.35087	0.0239884
AT1G16040	1.66944	0.000853374
AT1G16080	-1.3433	0.0056121
AT1G16120	2.5067	0.0200065
AT1G16170	-1.14919	0.00392825
AT1G16260	-2.40066	0.00242433
AT1G16320	1.25099	0.00757877
AT1G16390	-5.43564	0.000198781
AT1G16510	1.43711	0.0105451
AT1G16515	4.47964	0.00269844
AT1G16590	1.3512	0.0140243
AT1G16630	-3.8221	0.0113145
AT1G16640	-3.39038	0.0135185
AT1G16720	-1.12619	0.000775617
AT1G16740	1.17296	0.0151751
AT1G16830	1.99576	0.0216914
AT1G16850	5.34658	0.000297777
AT1G16880	-1.78809	0.0126663
AT1G17020	5.20919	0.00541271
AT1G17120	-1.29444	0.0015341
AT1G17147	-2.66902	0.0230645
AT1G17345	-2.88976	0.0116155
AT1G17430	-1.84001	0.0004505
AT1G17460	1.75463	0.000836637
AT1G17470	1.25881	0.00129231
AT1G17490	1.16194	0.00219632
AT1G17520	1.71896	0.0201382
AT1G17530	1.68781	0.0120024
AT1G17550	1.82808	0.000297577
AT1G17560	-2.94989	0.031236
AT1G17590	1.58346	0.00593992
AT1G17610	-1.43284	0.045247
AT1G17620	-1.4858	0.00643727
AT1G17650	-1.35982	0.0148006
AT1G17680	1.05314	0.0247131
AT1G17700	-2.80665	0.0122026
AT1G17744	2.85097	0.00541361
AT1G17745	2.47638	0.0010672
AT1G17830	2.26947	0.000912878
AT1G17870	4.10349	0.0323988
AT1G17940	1.3568	0.00456403
AT1G17970	-1.07682	0.00981134
AT1G18000	-1.19289	0.00145823
AT1G18010	-1.17117	0.00122452
AT1G18100	5.88008	0.00347504
AT1G18250	-6.87835	0.00127692
AT1G18265	1.46416	0.0297346
AT1G18370	-4.8134	0.00186063
AT1G18400	-3.24991	0.000547296
AT1G18410	-2.10139	0.0383116
AT1G18550	-1.9261	0.014223
AT1G18620	-3.07607	0.00184569
AT1G18650	-1.32277	0.00956232
AT1G18710	2.11344	0.00375868
AT1G18720	1.32395	0.00497077
AT1G18730	-1.43318	0.0438185
AT1G18745	1.2806	0.00216315
AT1G18800	1.03983	0.00260502
AT1G18830	-3.33482	0.0449909
AT1G18840	1.33528	0.00511342
AT1G18860	2.49335	0.0225634
AT1G18870	-1.39419	0.0123163
AT1G19020	-2.55798	0.0122092
AT1G19050	-2.89488	0.0013469
AT1G19150	-2.72222	0.000952072
AT1G19230	1.81833	0.0102678
AT1G19320	-4.95326	0.00862695
AT1G19380	-3.35304	0.00402497
AT1G19450	-2.58662	0.00259038
AT1G19490	3.35213	0.00155841
AT1G19510	-1.79933	0.0179648
AT1G19530	2.00196	0.00104296
AT1G19565	2.93558	0.00479959
AT1G19570	1.71311	0.00390677
AT1G19630	1.02236	0.0289358
AT1G19650	1.59076	0.00545881
AT1G19670	-1.4814	0.00673602
AT1G19690	1.13752	0.0155848
AT1G19710	-1.15483	0.0446108
AT1G19770	-1.35965	0.00913441
AT1G19830	-3.27566	0.000364846
AT1G19840	-2.18006	0.0116572
AT1G19950	-4.11389	0.021223
AT1G19960	-3.34236	0.000957874
AT1G19970	1.33702	0.00403837
AT1G19990	-1.3907	0.00826618
AT1G20010	-2.52286	0.000593292
AT1G20020	-2.36422	0.00223337
AT1G20090	-1.10544	0.000736343
AT1G20100	1.19461	0.00479077
AT1G20160	3.47922	0.00270416
AT1G20225	1.08437	0.00171717
AT1G20270	1.14269	0.0113775
AT1G20310	1.87084	0.0165302
AT1G20330	-1.97132	0.00057131
AT1G20340	-1.71633	0.00469905
AT1G20380	1.68174	0.0359955
AT1G20450	1.75257	0.000840865
AT1G20490	1.02367	0.0357887
AT1G20560	1.01213	0.00155555
AT1G20610	-2.1818	0.0374429
AT1G20720	-3.15127	0.0242512
AT1G20780	-1.54669	0.00275439
AT1G20795	1.81833	0.0102678
AT1G20816	1.0884	0.0043477
AT1G20823	-1.16246	0.00145435
AT1G20860	2.40395	0.0347564
AT1G21000	1.70463	0.00282406
AT1G21050	-2.69743	0.00339022
AT1G21070	-1.5262	0.00874527
AT1G21100	-1.87892	0.0353439
AT1G21120	-1.57809	0.0325514
AT1G21250	-1.57548	0.00476856
AT1G21270	-2.53073	0.00215137
AT1G21310	2.24859	0.00257925
AT1G21400	3.12692	0.000457203
AT1G21410	1.48281	0.0044861
AT1G21450	1.01268	0.0154518
AT1G21460	2.38763	0.000982784
AT1G21470	-2.37144	0.0125692
AT1G21500	-2.39778	0.000912878
AT1G21520	-1.10361	0.0489544
AT1G21529	4.89513	0.000364846
AT1G21540	-2.28315	0.0478646
AT1G21590	1.00092	0.0179462
AT1G21640	-1.01195	0.00180859
AT1G21680	1.53777	0.000560543
AT1G21750	1.57161	0.000247059
AT1G21780	1.03694	0.00154997
AT1G21790	1.73861	0.00425815
AT1G21880	-1.08792	0.00247742
AT1G21890	3.0615	0.0207828
AT1G21910	-4.28902	0.00376372
AT1G21970	1.98428	0.0176576
AT1G22065	1.32931	0.0449909
AT1G22130	-1.59361	0.0013469
AT1G22160	2.55025	0.00119767
AT1G22180	1.65099	0.000745475
AT1G22280	-1.32351	0.00268569
AT1G22330	-8.34566	0.00130925
AT1G22370	1.81981	0.00586022
AT1G22480	6.59912	0.0108515
AT1G22530	-2.46204	0.000300971
AT1G22590	-1.69506	0.00148124
AT1G22630	-1.00821	0.00854402
AT1G22650	-3.30928	0.00485641
AT1G22690	-6.09733	0.00194472
AT1G22740	-1.18098	0.0129515
AT1G22885	-1.19381	0.00622277
AT1G22985	1.32926	0.00372055
AT1G22990	9.09778	0.00119815
AT1G23000	-2.38709	0.0216013
AT1G23030	-3.4119	0.00618885
AT1G23040	1.28991	0.0155733
AT1G23070	2.63055	0.0111984
AT1G23090	-4.73332	0.00306606
AT1G23120	2.22243	0.00176628
AT1G23190	1.09227	0.000364846
AT1G23200	-1.06179	0.0321383
AT1G23205	-4.57602	0.00384531
AT1G23280	1.59023	0.00732455
AT1G23330	2.08811	0.00885444
AT1G23340	-2.26728	0.0459728
AT1G23390	-1.80344	0.000247059
AT1G23450	2.76299	0.025309
AT1G23480	-6.06698	0.00335852
AT1G23550	2.13941	0.0043228
AT1G23790	-2.99145	0.0318584
AT1G23800	1.77225	0.00565209
AT1G23860	1.36379	0.00108985
AT1G23870	-1.76575	0.00420195
AT1G23880	-1.37154	0.0347564
AT1G24020	-2.47624	0.00113352
AT1G24147	-4.63775	0.00137091
AT1G24150	-1.81331	0.00517442
AT1G24170	-2.97098	0.000396166
AT1G24270	1.21828	0.0412724
AT1G24450	1.2302	0.000297577
AT1G24470	2.48992	0.00600132
AT1G24530	-1.95629	0.000436247
AT1G24570	2.32812	0.0401273
AT1G24580	6.53558	0.00131478
AT1G24600	4.15274	0.00190084
AT1G24735	1.88428	0.020376
AT1G24851	1.85441	0.0281514
AT1G24909	-1.25685	0.0499341
AT1G25083	-1.45009	0.0419241
AT1G25180	1.85817	0.0260168
AT1G25220	-1.07036	0.0179462
AT1G25230	-2.15539	0.000543004
AT1G25260	1.05089	0.00927507
AT1G25277	2.12341	0.00596373
AT1G25450	-3.3797	0.00266238
AT1G25510	-2.74113	0.007119
AT1G25530	3.05112	0.00172906
AT1G26170	1.07729	0.00205243
AT1G26208	1.56125	0.00163221
AT1G26330	-2.72381	0.0114685
AT1G26540	-4.18448	0.00233106
AT1G26570	-2.26637	0.00813955
AT1G26600	-2.35769	0.0410986
AT1G26665	1.31596	0.00323608
AT1G26670	1.00835	0.00509425
AT1G26730	-1.10176	0.0305723
AT1G26761	-1.52848	0.0217637
AT1G26770	-2.64309	0.00524711
AT1G26780	-2.01151	0.0248929
AT1G26810	-1.44816	0.0156338
AT1G26840	-3.17453	0.0254455
AT1G26945	-1.99839	0.00806576
AT1G26960	-1.38476	0.0116488
AT1G27020	-5.13852	0.00906885
AT1G27045	-4.52946	0.000980975
AT1G27150	2.09205	0.00072832
AT1G27170	1.72316	0.00348592
AT1G27200	1.94627	0.00202412
AT1G27210	-1.70503	0.00413484
AT1G27300	1.36366	0.00194684
AT1G27460	-2.09785	0.00369707
AT1G27461	4.72791	0.0010672
AT1G27470	1.03854	0.00640281
AT1G27480	-1.4193	0.00472748
AT1G27510	1.22993	0.00513966
AT1G27565	1.25239	0.0350148
AT1G27700	-1.02846	0.0173113
AT1G27760	1.60191	0.00189979
AT1G27900	1.04998	0.0344219
AT1G27921	3.2318	0.0333863
AT1G27940	-2.11497	0.00956232
AT1G27980	1.37897	0.00563292
AT1G28010	-3.67741	0.0057645
AT1G28130	-2.9551	0.036268
AT1G28140	1.0281	0.00235195
AT1G28190	1.14425	0.0215277
AT1G28230	1.37388	0.00188254
AT1G28260	1.93739	0.00289159
AT1G28290	-3.47419	0.000628784
AT1G28330	1.19188	0.00675917
AT1G28360	2.77029	0.00699865
AT1G28370	1.7186	0.00895101
AT1G28480	-2.53738	0.0235432
AT1G28580	1.28811	0.000688706
AT1G28765	2.0445	0.00201387
AT1G29030	1.21142	0.0208083
AT1G29050	1.1181	0.0206056
AT1G29070	-1.48737	0.00190084
AT1G29071	-1.64113	0.0173703
AT1G29240	1.59303	0.0104303
AT1G29270	-3.06002	0.0217098
AT1G29330	1.32967	0.029103
AT1G29370	1.11042	0.00137522
AT1G29395	1.56457	0.0111873
AT1G29418	1.2332	0.00074176
AT1G29430	-2.88298	0.000635362
AT1G29440	-2.43825	0.00188254
AT1G29450	-2.80303	0.00744611
AT1G29460	-1.62101	0.00403837
AT1G29510	-1.69722	0.00250985
AT1G29520	-1.8066	0.00849248
AT1G29530	-1.10654	0.00292355
AT1G29535	-1.32643	0.00964157
AT1G29640	4.91646	0.00596627
AT1G29660	-3.08816	0.000547296
AT1G29670	-2.03264	0.00193761
AT1G29680	3.30527	0.0202944
AT1G29860	2.29683	0.023124
AT1G29910	-1.88185	0.00236562
AT1G29920	-2.53137	0.000304655
AT1G29930	-1.20659	0.00801949
AT1G29940	1.05455	0.00301675
AT1G29960	1.03914	0.0203282
AT1G29980	-2.20736	0.00157787
AT1G30070	1.14879	0.0494712
AT1G30140	2.23193	0.00664796
AT1G30190	7.42614	0.000874929
AT1G30220	6.49781	0.00092466
AT1G30230	1.01216	0.00151371
AT1G30250	-1.78935	0.00736726
AT1G30280	-3.29857	0.00437252
AT1G30290	1.1629	0.041579
AT1G30380	-2.28407	0.000185766
AT1G30420	-1.39575	0.0426971
AT1G30440	-1.05695	0.00988226
AT1G30460	1.32643	0.00588594
AT1G30500	2.82919	0.0004505
AT1G30515	-2.1139	0.00104581
AT1G30520	-2.77321	0.00392825
AT1G30570	-1.10569	0.0202764
AT1G30640	1.47407	0.0095449
AT1G30690	-1.76733	0.00997239
AT1G30720	-4.88235	0.0241583
AT1G30730	-4.70888	0.00441258
AT1G30820	1.35059	0.00139784
AT1G30880	1.53115	0.00057131
AT1G31120	1.32959	0.0170537
AT1G31170	1.24732	0.00115626
AT1G31173	-1.61058	0.0167264
AT1G31320	-2.60502	0.0125515
AT1G31330	-2.30254	0.00124855
AT1G31335	-1.49396	0.01295
AT1G31420	-1.2281	0.00363607
AT1G31580	-4.99172	0.000271027
AT1G31600	1.2374	0.00376374
AT1G31690	-6.11371	0.00191829
AT1G31710	-2.181	0.00311581
AT1G31750	3.81305	0.00117042
AT1G31790	2.21199	0.0212359
AT1G31820	1.8219	0.00237925
AT1G31830	1.59432	0.001106
AT1G31835	1.64072	0.0103723
AT1G31850	-1.85345	0.0216705
AT1G31910	1.0992	0.00102129
AT1G31990	-1.83698	0.00934357
AT1G32060	-1.71287	0.00065438
AT1G32080	-2.58646	0.000198781
AT1G32090	-1.42289	0.00242971
AT1G32170	-2.26637	0.00469905
AT1G32190	-1.81509	0.0258407
AT1G32200	-1.54548	0.00143998
AT1G32220	-1.30762	0.00440477
AT1G32260	1.2057	0.00387149
AT1G32385	1.00345	0.0263745
AT1G32450	3.99388	0.00208444
AT1G32470	-2.78983	0.0011118
AT1G32520	1.08296	0.00332577
AT1G32560	4.09023	0.00439683
AT1G32770	3.85995	0.0395552
AT1G32860	1.06774	0.0459577
AT1G32870	1.92942	0.014657
AT1G32900	2.63816	0.000682074
AT1G32920	-1.65065	0.0370158
AT1G32928	-1.08942	0.0490602
AT1G32990	-1.46563	0.00137653
AT1G33030	1.79495	0.0186581
AT1G33102	3.56102	0.00104088
AT1G33110	1.35366	0.00119767
AT1G33170	-3.38874	0.0115782
AT1G33240	-2.36309	0.00506732
AT1G33260	1.50068	0.0138046
AT1G33265	2.01634	0.000965703
AT1G33270	1.60291	0.00149108
AT1G33415	1.70879	0.00504644
AT1G33480	2.5916	0.0112314
AT1G33490	1.63746	0.00143095
AT1G33560	1.21186	0.0291986
AT1G33590	-1.14552	0.00704453
AT1G33610	-4.07622	0.0129677
AT1G33700	1.4709	0.0342449
AT1G33760	-3.69621	0.00265205
AT1G33770	-2.90136	0.00403306
AT1G33790	-2.67106	0.00155562
AT1G33811	-4.58995	0.000951885
AT1G34000	-1.06453	0.00217658
AT1G34010	-1.34506	0.0128817
AT1G34110	1.06233	0.00242046
AT1G34160	1.04686	0.0169846
AT1G34245	-1.35877	0.0169804
AT1G34760	-1.59124	0.0340996
AT1G35140	-3.69126	0.018856
AT1G35180	-4.30351	0.0228526
AT1G35190	1.46956	0.00321976
AT1G35230	-1.91304	0.0241582
AT1G35320	1.32645	0.00506732
AT1G35350	-2.34989	0.00192781
AT1G35516	1.34013	0.00203901
AT1G35580	-1.24633	0.00208444
AT1G35680	-1.41779	0.000841277
AT1G35710	-1.4633	0.0189064
AT1G35720	3.12998	0.000912878
AT1G35830	-2.0488	0.00672423
AT1G36380	1.44544	0.0339869
AT1G36730	1.16511	0.00118111
AT1G36940	-3.50511	0.00323608
AT1G40104	5.14164	0.00834538
AT1G42970	-1.53955	0.000547296
AT1G43245	1.47804	0.00593452
AT1G43560	-1.02471	0.00843534
AT1G43640	2.56731	0.0187402
AT1G43670	-2.05403	0.000332122
AT1G43700	1.38195	0.000411312
AT1G43770	1.50477	0.023883
AT1G43800	-2.3076	0.0165807
AT1G44000	-1.3377	0.00220251
AT1G44110	-4.62333	0.00160881
AT1G44575	-1.12876	0.00344084
AT1G44760	1.59156	0.00509841
AT1G44810	1.38975	0.00137653
AT1G44830	-5.19683	0.00043249
AT1G44900	-1.84316	0.00686991
AT1G44920	-1.21751	0.0161026
AT1G44960	1.26846	0.0305757
AT1G45010	-1.82254	0.00722288
AT1G45130	-1.87788	0.00440313
AT1G45145	1.3973	0.00692361
AT1G45180	-2.1762	0.00239038
AT1G45201	-1.76085	0.0194097
AT1G45207	-1.34515	0.00172864
AT1G45230	1.64875	0.00170331
AT1G45249	3.44947	0.000346377
AT1G45332	1.56067	0.00848537
AT1G45474	-1.30596	0.000535243
AT1G46554	2.49404	0.000410598
AT1G46768	2.25093	0.00644478
AT1G47210	-1.97106	0.0041749
AT1G47290	-1.32765	0.016276
AT1G47340	1.41131	0.0198324
AT1G47370	-2.51343	0.00292682
AT1G47380	-1.97964	0.015578
AT1G47410	-1.40772	0.0346566
AT1G47510	3.00218	0.038401
AT1G47570	2.15623	0.00723922
AT1G47670	-1.39028	0.0301936
AT1G47710	1.48903	0.00057131
AT1G47740	-1.27535	0.00110854
AT1G47813	3.02123	0.0246568
AT1G47820	1.90656	0.00158245
AT1G47840	-3.62072	0.0248175
AT1G47960	2.74682	0.000580455
AT1G47980	4.73408	0.0147457
AT1G48000	4.47112	0.000608206
AT1G48240	-1.2392	0.0191708
AT1G48300	1.17651	0.00316372
AT1G48310	1.45135	0.0015341
AT1G48350	-1.05272	0.03878
AT1G48370	1.7114	0.0126452
AT1G48460	1.19699	0.00415709
AT1G48480	-4.31598	0.00138377
AT1G48500	3.4068	0.00786119
AT1G48540	1.14553	0.0196085
AT1G48580	-2.56669	0.0302457
AT1G48610	-1.78675	0.00169334
AT1G48630	-1.35477	0.00347448
AT1G48742	2.93159	0.00796596
AT1G48860	1.2868	0.000576026
AT1G48920	1.00445	0.00390787
AT1G48950	1.15735	0.0482964
AT1G49200	1.9327	0.00165937
AT1G49210	-4.16779	0.0137789
AT1G49230	-2.15042	0.000665803
AT1G49430	-1.54233	0.00759245
AT1G49450	1.9385	0.00335164
AT1G49540	1.884	0.0265912
AT1G49560	1.27141	0.0368747
AT1G49660	1.62288	0.00392825
AT1G49670	1.21671	0.00130499
AT1G49700	1.38682	0.0163647
AT1G49730	-2.78821	0.00475194
AT1G49750	-4.64699	0.000688706
AT1G49832	1.22734	0.0111987
AT1G49870	-4.31943	0.00732374
AT1G49900	3.16248	0.00473498
AT1G49920	-3.05755	0.000686674
AT1G49940	2.2336	0.0033999
AT1G49960	2.68237	0.0330551
AT1G50010	-2.87692	0.00136731
AT1G50040	-3.21019	0.0440454
AT1G50110	-2.34562	0.0146432
AT1G50240	-2.3313	0.00139309
AT1G50260	1.72926	0.00249595
AT1G50290	1.09614	0.00199626
AT1G50310	-2.00277	0.0167797
AT1G50320	-1.38169	0.000471568
AT1G50380	1.14536	0.0054949
AT1G50420	1.54826	0.000367411
AT1G50440	-1.184	0.0138786
AT1G50460	-2.03214	0.00269056
AT1G50490	-2.58745	0.0118762
AT1G50630	1.94163	0.00260951
AT1G50650	-1.84026	0.00544767
AT1G50732	-2.00753	0.00210451
AT1G50780	2.53949	0.0311703
AT1G50920	1.07084	0.00492697
AT1G50930	4.22496	0.00582844
AT1G51060	-1.27194	0.00254735
AT1G51090	2.23519	0.00108177
AT1G51110	-1.22379	0.0497715
AT1G51140	4.1417	0.000560543
AT1G51200	1.29847	0.000433582
AT1G51270	-1.02163	0.00927867
AT1G51310	1.01254	0.0243138
AT1G51370	1.00534	0.0116142
AT1G51570	-1.03174	0.00253974
AT1G51730	1.01324	0.0070396
AT1G51780	-2.4932	0.00104581
AT1G51790	-1.02968	0.0111862
AT1G51800	-4.3651	0.0145313
AT1G51805	-2.2022	0.00204461
AT1G51820	-2.71117	0.0055761
AT1G51940	-1.70214	0.00351014
AT1G51965	1.14485	0.0115293
AT1G52000	3.09937	0.000217769
AT1G52040	3.26861	0.0044861
AT1G52080	3.09423	0.00258039
AT1G52140	-3.01828	0.0240144
AT1G52160	1.23788	0.0194097
AT1G52190	-2.99959	0.00168523
AT1G52200	-3.59343	0.00941072
AT1G52220	-1.97625	0.000640545
AT1G52230	-2.26506	0.00092466
AT1G52280	-1.53452	0.00100493
AT1G52290	-3.84312	0.00263987
AT1G52330	-2.08382	0.00537724
AT1G52342	-1.03561	0.0346079
AT1G52380	1.08165	0.00906614
AT1G52400	1.55567	0.00943344
AT1G52410	1.48531	0.0300485
AT1G52510	-2.13127	0.000800435
AT1G52560	3.04848	0.0453934
AT1G52570	2.78276	0.0112496
AT1G52590	1.28385	0.0167264
AT1G52690	12.2436	0.000623873
AT1G52700	-2.56165	0.001223
AT1G52750	-4.98854	0.000198781
AT1G52770	-2.5176	0.0405345
AT1G52830	-3.4796	0.0341539
AT1G52855	2.03868	0.00705137
AT1G52890	3.33652	0.0107132
AT1G52905	1.52506	0.00029622
AT1G52920	3.11966	0.00519283
AT1G52980	1.13955	0.00342676
AT1G52990	1.82429	0.0354419
AT1G53000	1.32919	0.00375868
AT1G53025	1.25504	0.0159891
AT1G53030	1.19148	0.00263987
AT1G53035	1.09366	0.00907161
AT1G53080	1.98533	0.00782307
AT1G53090	1.44774	0.012675
AT1G53100	2.47964	0.0341516
AT1G53140	-4.25504	0.0132466
AT1G53160	1.70515	0.0129816
AT1G53163	-2.49318	0.0435018
AT1G53170	1.02149	0.0293316
AT1G53230	-1.37523	0.00147107
AT1G53280	1.83678	0.00137994
AT1G53340	-2.82756	0.0137858
AT1G53430	-2.04545	0.0049701
AT1G53460	1.1356	0.00162267
AT1G53470	2.95757	0.0374375
AT1G53520	-5.25256	0.00536386
AT1G53540	5.60487	0.00109794
AT1G53580	1.47219	0.00111556
AT1G53625	-1.8377	0.0410396
AT1G53655	1.96021	0.0101945
AT1G53690	-3.82795	0.0416428
AT1G53720	1.03474	0.00912879
AT1G53730	-4.15525	0.0115685
AT1G53760	1.16461	0.0308757
AT1G53780	1.36445	0.00113352
AT1G53790	1.03592	0.0273603
AT1G53830	-1.6147	0.0176234
AT1G53840	-1.60815	0.00364715
AT1G53875	-1.05952	0.0378838
AT1G53887	1.82125	0.000433582
AT1G53910	1.26129	0.000898397
AT1G53920	-3.58282	0.00252888
AT1G54000	-4.22351	0.0118517
AT1G54010	-2.86946	0.00907832
AT1G54100	2.93949	0.000505465
AT1G54120	1.49959	0.0363347
AT1G54160	3.30754	0.0072232
AT1G54215	-1.18916	0.033206
AT1G54217	-1.71071	0.00513829
AT1G54260	1.67847	0.0051745
AT1G54380	1.11277	0.0145758
AT1G54385	-3.58218	0.00207513
AT1G54450	-1.28551	0.030988
AT1G54575	3.40681	0.00152856
AT1G54740	-1.37047	0.00219303
AT1G54820	-3.23013	0.000906768
AT1G54860	2.91004	0.0215066
AT1G54870	6.45262	0.004547
AT1G55010	-3.43363	0.00444836
AT1G55110	1.1543	0.00549943
AT1G55160	-1.05599	0.0118469
AT1G55180	1.07456	0.0217604
AT1G55200	-3.42788	0.00914188
AT1G55260	-1.52537	0.00112111
AT1G55280	1.51199	0.00209258
AT1G55310	1.43878	0.00261624
AT1G55320	1.1297	0.0145391
AT1G55330	-1.83698	0.00934357
AT1G55360	-1.28834	0.00305136
AT1G55370	-1.00537	0.0204882
AT1G55450	-1.65496	0.00439683
AT1G55480	-1.20601	0.0043761
AT1G55490	-1.02183	0.0117186
AT1G55530	1.23367	0.00175071
AT1G55670	-2.03961	0.00525574
AT1G55675	1.17643	0.000313426
AT1G55680	1.19627	0.00272425
AT1G55760	2.05028	0.00196604
AT1G55770	-2.28131	0.0288962
AT1G55810	-1.5198	0.00167983
AT1G55820	1.6894	0.0369207
AT1G55920	1.83466	0.000898244
AT1G55990	1.63384	0.00957351
AT1G56010	1.21425	0.0168903
AT1G56145	1.06095	0.00278318
AT1G56190	-1.41259	0.00057537
AT1G56210	-2.01824	0.00319298
AT1G56240	-3.77039	0.0222863
AT1G56280	1.37939	0.00230577
AT1G56320	2.55412	0.0214136
AT1G56430	-3.09947	0.000982784
AT1G56500	-1.31256	0.00215576
AT1G56555	-2.12448	0.0288306
AT1G56600	3.73695	0.000842432
AT1G56650	3.35805	0.000884918
AT1G56680	-1.84026	0.00544767
AT1G57540	1.25616	0.00445529
AT1G57560	-2.17319	0.0349863
AT1G57590	4.15463	0.00129336
AT1G57680	-1.22803	0.0025028
AT1G57730	3.43859	0.000367411
AT1G57750	-5.72278	0.00456105
AT1G57770	-1.92035	0.00148259
AT1G57820	-2.8329	0.00516984
AT1G57943	-1.41021	0.0236538
AT1G57980	-1.96404	0.024351
AT1G57990	-3.6126	0.00483428
AT1G58030	1.20001	0.0105121
AT1G58235	1.36059	0.00116183
AT1G58270	2.64462	0.000364846
AT1G58290	-1.6963	0.0017759
AT1G58360	2.10445	0.00235524
AT1G58370	-1.35367	0.0470806
AT1G58440	-1.36823	0.00256564
AT1G58460	-3.52923	0.003977
AT1G58470	1.25785	0.0198016
AT1G58520	1.36282	0.00987392
AT1G58602	-1.14812	0.00686111
AT1G59530	2.75477	0.00301799
AT1G59590	-2.22202	0.0214248
AT1G59640	2.31507	0.0120856
AT1G59700	1.19551	0.00233528
AT1G59730	1.82289	0.00474813
AT1G59840	-1.38751	0.00601003
AT1G59860	-2.00118	0.0130137
AT1G59940	-2.41244	0.00796596
AT1G59950	-3.01351	0.0326864
AT1G59970	-1.10253	0.0453269
AT1G60060	-2.0352	0.00313357
AT1G60190	4.25572	0.00531311
AT1G60390	-3.14755	0.00918604
AT1G60420	1.08861	0.00633891
AT1G60470	3.07282	0.0492784
AT1G60590	-3.76621	0.000813756
AT1G60610	1.87712	0.00695708
AT1G60620	1.77976	0.0018343
AT1G60660	-1.23838	0.00407336
AT1G60680	2.44433	0.0288295
AT1G60710	1.04955	0.0116155
AT1G60800	-1.38073	0.00708325
AT1G60860	1.27306	0.0118435
AT1G60950	-1.92688	0.000527427
AT1G60960	-1.07938	0.0494441
AT1G60970	5.13555	0.016652
AT1G60989	1.69044	0.0162187
AT1G61100	-1.85019	0.00282406
AT1G61110	2.60241	0.0263957
AT1G61170	-2.32987	0.00589358
AT1G61230	2.85136	0.00510588
AT1G61450	-3.63238	0.0249494
AT1G61460	1.77044	0.0409499
AT1G61520	-1.12413	0.000996759
AT1G61620	1.20619	0.000491959
AT1G61700	2.4723	0.00194684
AT1G61740	-1.41706	0.00157296
AT1G61890	1.24956	0.0177729
AT1G61900	-1.28629	0.00300317
AT1G61970	1.24555	0.00934447
AT1G61980	1.04855	0.040455
AT1G62030	1.09256	0.0406088
AT1G62035	4.05907	0.00186629
AT1G62290	2.92001	0.00130871
AT1G62305	1.90809	0.0353151
AT1G62380	-2.40688	0.00272425
AT1G62440	-4.21692	0.00421841
AT1G62480	-3.26083	0.000279579
AT1G62500	-5.52239	0.00150076
AT1G62510	3.34422	0.0013469
AT1G62520	-3.77492	0.00440033
AT1G62540	1.26263	0.0360348
AT1G62570	2.97663	0.00742628
AT1G62610	2.40208	0.0339869
AT1G62620	3.22208	0.00318039
AT1G62640	-1.09107	0.00259038
AT1G62710	3.14923	0.000519753
AT1G62720	2.93751	0.0260763
AT1G62750	-1.26063	0.00288041
AT1G62790	-1.60015	0.0283465
AT1G62810	2.54135	0.000641413
AT1G62840	1.57541	0.00137994
AT1G63010	1.60162	0.00157787
AT1G63055	3.81991	0.000367411
AT1G63100	-3.30413	0.00206112
AT1G63180	-1.51364	0.00600199
AT1G63220	-1.47778	0.00232869
AT1G63240	1.02136	0.00870976
AT1G63260	-2.96997	0.00133539
AT1G63300	-2.02197	0.0261136
AT1G63310	-1.60247	0.0126795
AT1G63370	2.32088	0.00618487
AT1G63420	1.46452	0.00198783
AT1G63450	2.22462	0.0131556
AT1G63480	-1.7892	0.00520643
AT1G63690	-1.06544	0.0123682
AT1G63710	-4.55682	0.00452304
AT1G63780	1.33203	0.00091546
AT1G63840	1.86477	0.00129949
AT1G64110	7.94832	0.000821507
AT1G64170	-4.80043	0.015665
AT1G64180	1.29373	0.0109498
AT1G64200	-1.85769	0.0158855
AT1G64350	1.40746	0.00596225
AT1G64390	-1.43292	0.0225461
AT1G64490	1.25945	0.00160596
AT1G64510	-1.58742	0.00168946
AT1G64540	3.21216	0.0021636
AT1G64600	1.17932	0.0141089
AT1G64640	-2.27821	0.000836637
AT1G64660	3.21459	0.000247059
AT1G64670	-2.26494	0.00444276
AT1G64690	1.43998	0.00306923
AT1G64760	-1.13961	0.00137091
AT1G64770	-1.12525	0.00723702
AT1G64810	1.37527	0.00315711
AT1G64900	1.26843	0.00257165
AT1G64930	2.4431	0.03231
AT1G64940	1.42416	0.00295375
AT1G64950	2.22852	0.000188907
AT1G64970	1.50218	0.00158245
AT1G65000	1.35243	0.00085542
AT1G65010	-1.78653	0.00255081
AT1G65032	1.00593	0.0357977
AT1G65040	1.34177	0.000699284
AT1G65060	-1.85441	0.0071116
AT1G65090	3.45316	0.00295863
AT1G65230	-2.00326	0.00378586
AT1G65280	1.07539	0.022857
AT1G65295	-1.13791	0.00192095
AT1G65330	-3.80245	0.00127998
AT1G65390	-4.9883	0.0030515
AT1G65450	-4.43688	0.00130871
AT1G65470	-1.76976	0.0287352
AT1G65484	-3.11919	0.00106257
AT1G65486	-3.90389	0.00246086
AT1G65490	-2.58829	0.00271621
AT1G65590	-2.1777	0.00113045
AT1G65660	1.67057	0.00395489
AT1G65690	2.02419	0.0152783
AT1G65710	-5.17828	0.00120204
AT1G65760	2.32562	0.0280343
AT1G65790	-1.82079	0.025199
AT1G65845	-3.89201	0.0140647
AT1G65890	3.17382	0.00790755
AT1G65980	1.72048	0.000237166
AT1G66090	-2.67947	0.0310192
AT1G66100	-9.15213	0.000364846
AT1G66150	-1.27571	0.00842619
AT1G66180	-2.05001	0.000667863
AT1G66190	-2.3976	0.0053729
AT1G66200	-1.42419	0.0101393
AT1G66235	1.82188	0.00579296
AT1G66240	1.475	0.000149107
AT1G66350	-1.83403	0.00372055
AT1G66390	5.10608	0.00680468
AT1G66590	1.01869	0.0179388
AT1G66620	-1.99626	0.030701
AT1G66725	-1.16382	0.00717804
AT1G66830	2.13699	0.0121644
AT1G66840	1.70688	0.0221554
AT1G66880	-1.52423	0.0143113
AT1G66890	1.24524	0.0138592
AT1G66920	-1.11146	0.0319325
AT1G66930	-5.88483	0.0015341
AT1G66940	-6.63632	0.000719194
AT1G66970	-2.63	0.00167562
AT1G67035	-3.23181	0.0179462
AT1G67090	-3.13149	0.000783816
AT1G67120	1.23458	0.0358904
AT1G67170	1.15109	0.00867327
AT1G67180	-2.95565	0.0430844
AT1G67300	2.06606	0.000541002
AT1G67340	1.08278	0.00764932
AT1G67360	2.41152	0.00105439
AT1G67365	3.46754	0.00110549
AT1G67480	-1.40011	0.00278937
AT1G67500	1.49126	0.00345794
AT1G67520	1.29495	0.021421
AT1G67650	1.46191	0.0389358
AT1G67740	-4.23466	0.00600199
AT1G67750	-4.18169	0.000203994
AT1G67810	-1.90786	0.0150877
AT1G67830	-2.15702	0.00742372
AT1G67850	1.12431	0.0161026
AT1G67865	-1.19483	0.00225974
AT1G67910	-3.09218	0.00677309
AT1G67920	4.26731	0.000729674
AT1G67940	1.15803	0.03919
AT1G68238	-2.72171	0.0165881
AT1G68250	5.34239	0.00284628
AT1G68310	1.15193	0.00210793
AT1G68330	-3.65952	0.00648994
AT1G68360	1.1624	0.0269252
AT1G68400	-2.35058	0.00148337
AT1G68500	2.61487	0.00342249
AT1G68520	-1.07936	0.00092466
AT1G68560	-1.3929	0.00324722
AT1G68570	2.88696	0.000369989
AT1G68585	-1.67403	0.00347504
AT1G68590	-1.34002	0.00392226
AT1G68610	2.36912	0.0417234
AT1G68650	-1.32564	0.0131783
AT1G68730	1.23892	0.0086571
AT1G68780	-1.63741	0.0183652
AT1G68840	-3.83542	0.00136672
AT1G68850	3.46502	0.0458908
AT1G68880	3.67147	0.0187282
AT1G68890	-1.20337	0.0111881
AT1G69030	-1.77033	0.00249595
AT1G69040	-2.06421	0.000635362
AT1G69080	-1.49523	0.0110733
AT1G69160	-2.00756	0.00390662
AT1G69210	1.19471	0.0268207
AT1G69252	2.9127	0.000217769
AT1G69260	3.09672	0.00364289
AT1G69270	1.25759	0.0107043
AT1G69280	1.19369	0.00591106
AT1G69295	1.98189	0.000367411
AT1G69310	1.64358	0.0181394
AT1G69360	1.36262	0.00798494
AT1G69410	1.42775	0.00092466
AT1G69420	-1.19629	0.00469905
AT1G69430	1.64563	0.00447664
AT1G69480	4.0401	0.032628
AT1G69490	2.68469	0.00428891
AT1G69510	1.17095	0.00138577
AT1G69523	-1.40308	0.0231242
AT1G69530	-3.70958	0.000923947
AT1G69610	1.81347	0.0065369
AT1G69640	1.07742	0.00216315
AT1G69700	-1.76864	0.00057131
AT1G69740	-1.01557	0.00181701
AT1G69770	-1.11452	0.0151085
AT1G69780	-1.42658	0.0122982
AT1G69790	2.54326	0.00314762
AT1G69890	-1.13963	0.0165807
AT1G69900	-4.3365	0.0135484
AT1G69910	-1.01355	0.00726957
AT1G70000	1.68758	0.00723702
AT1G70090	-3.23121	0.00153182
AT1G70150	1.40542	0.00257925
AT1G70160	1.76727	0.000396166
AT1G70210	-1.18187	0.0165807
AT1G70270	-5.42709	0.00168839
AT1G70280	-1.24732	0.00382743
AT1G70300	3.72916	0.000364846
AT1G70370	-1.59548	0.00273462
AT1G70410	-2.14109	0.000156763
AT1G70470	-2.07431	0.00196066
AT1G70550	-1.67503	0.033985
AT1G70640	2.53023	0.0035295
AT1G70700	-1.36224	0.0331965
AT1G70710	-3.01095	0.000793864
AT1G70720	3.1026	0.00243294
AT1G70800	1.4601	0.00571368
AT1G70820	-3.10107	0.00057131
AT1G70900	1.08227	0.001821
AT1G70920	2.50952	0.0121969
AT1G70990	-3.9051	0.0177699
AT1G71000	4.14619	0.00321421
AT1G71020	-1.15122	0.00412577
AT1G71080	1.34975	0.000736343
AT1G71090	1.42158	0.00320985
AT1G71110	2.2792	0.0066273
AT1G71260	1.74297	0.00172614
AT1G71330	1.92549	0.0158291
AT1G71340	1.91044	0.000781739
AT1G71360	1.80503	0.0016521
AT1G71730	1.04689	0.00675917
AT1G71760	-2.24378	0.0118942
AT1G71840	1.30776	0.00170299
AT1G71880	-1.3586	0.000527427
AT1G71910	2.22997	0.00767109
AT1G71950	1.06852	0.000519753
AT1G71970	-1.03555	0.00873142
AT1G71980	1.34561	0.000324917
AT1G72000	-1.28903	0.0298535
AT1G72040	1.61817	0.000736343
AT1G72100	3.5305	0.0176921
AT1G72120	1.80975	0.0184333
AT1G72150	-1.05506	0.000686674
AT1G72180	-1.08802	0.00313921
AT1G72210	1.78464	0.0152737
AT1G72250	-3.77117	0.00137653
AT1G72416	-5.02903	0.000851166
AT1G72430	-2.5893	0.000198781
AT1G72450	-1.16574	0.0102531
AT1G72510	1.04719	0.0109154
AT1G72610	-6.49369	0.00211685
AT1G72620	-4.52843	0.0020584
AT1G72640	-1.27284	0.00698223
AT1G72650	1.35878	0.00546495
AT1G72660	3.00401	0.00761557
AT1G72680	1.28346	0.00872338
AT1G72690	1.83217	0.00235195
AT1G72700	2.20899	0.00230484
AT1G72730	-1.81074	0.00852887
AT1G72770	4.29951	0.000297577
AT1G72830	2.76282	0.0045313
AT1G72910	-2.01937	0.00124855
AT1G72930	-2.89037	0.00283493
AT1G72940	-1.56767	0.00358795
AT1G72970	-2.27016	0.00198504
AT1G72990	1.01184	0.00610562
AT1G73010	1.95013	0.00567532
AT1G73020	-1.90117	0.0108515
AT1G73040	3.01573	0.00743018
AT1G73210	1.56255	0.0164157
AT1G73220	4.84622	0.00328222
AT1G73380	1.25133	0.0236153
AT1G73390	2.96155	0.000281186
AT1G73400	1.3891	0.022676
AT1G73410	2.61286	0.0160903
AT1G73600	-3.50302	0.0015175
AT1G73620	-5.19728	0.00526001
AT1G73655	-1.59093	0.00104581
AT1G73680	1.9752	0.00242046
AT1G73687	3.28001	0.0476285
AT1G73710	1.1453	0.00250062
AT1G73780	3.35843	0.00996972
AT1G73805	-1.85851	0.0193255
AT1G73810	2.19067	0.00120399
AT1G73820	1.10047	0.0107968
AT1G73830	-1.50423	0.0194634
AT1G73880	1.16064	0.00336846
AT1G73890	1.60975	0.0336838
AT1G73980	1.28109	0.000781255
AT1G74070	-1.17812	0.00849124
AT1G74120	1.42184	0.0360317
AT1G74180	1.6503	0.0262014
AT1G74240	1.06277	0.0205203
AT1G74410	1.21203	0.0344001
AT1G74440	-2.06219	0.000898244
AT1G74560	1.30846	0.00388305
AT1G74590	1.47983	0.015007
AT1G74670	-4.63407	0.00723537
AT1G74690	-1.64141	0.00381328
AT1G74730	-1.42665	0.00176387
AT1G74890	-3.25586	0.0136649
AT1G74910	-1.67858	0.0367555
AT1G74970	-1.02315	0.000809017
AT1G75030	-3.49601	0.009467
AT1G75110	1.71329	0.0215066
AT1G75150	-3.49683	0.0390973
AT1G75180	-1.52911	0.00261101
AT1G75190	-1.27952	0.0109949
AT1G75220	-1.06832	0.0166265
AT1G75250	-4.79227	0.000783816
AT1G75290	2.17161	0.00149854
AT1G75370	1.22957	0.0111897
AT1G75400	1.62311	0.001223
AT1G75450	-2.35339	0.00799546
AT1G75500	-1.96338	0.000590996
AT1G75590	-3.3026	0.00129088
AT1G75630	1.02782	0.00610562
AT1G75640	-3.71527	0.0252619
AT1G75670	1.19211	0.0340967
AT1G75680	-1.50864	0.0139286
AT1G75690	-2.25816	0.00091071
AT1G75750	-4.40713	0.000933789
AT1G75810	1.41425	0.00139309
AT1G75820	-1.87218	0.000939238
AT1G75830	2.93637	0.0375087
AT1G75840	-1.14573	0.00157429
AT1G75890	-2.46528	0.0245282
AT1G75960	-3.81499	0.00334777
AT1G76040	-1.46597	0.00761005
AT1G76080	-1.49774	0.000458517
AT1G76090	-2.96187	0.0018944
AT1G76100	-1.16373	0.000300971
AT1G76110	-1.12279	0.0154101
AT1G76160	-3.27009	0.00134675
AT1G76185	1.34349	0.00762813
AT1G76190	-2.54597	0.0124434
AT1G76240	-5.2741	0.00159742
AT1G76250	-2.63978	0.0162706
AT1G76310	-5.2378	0.00314323
AT1G76320	1.07081	0.0447555
AT1G76380	1.14107	0.005795
AT1G76390	1.09995	0.0298753
AT1G76450	-1.10046	0.0165205
AT1G76540	-3.53523	0.00247595
AT1G76570	1.31648	0.0127478
AT1G76580	1.41076	0.00146341
AT1G76590	2.07913	0.00258298
AT1G76680	-1.86305	0.00318728
AT1G76720	1.37757	0.00938199
AT1G76740	-2.91155	0.0456375
AT1G76760	1.87996	0.00754536
AT1G76770	-3.07496	0.00387149
AT1G76800	-1.14498	0.0056712
AT1G76810	1.03989	0.00423807
AT1G76820	1.74473	0.00796636
AT1G76890	-1.12783	0.00202846
AT1G76960	1.88826	0.0016178
AT1G76980	3.12805	0.00311149
AT1G76990	-1.17783	0.00190656
AT1G77000	1.12164	0.00256049
AT1G77030	1.43654	0.00830827
AT1G77060	-1.44161	0.00692361
AT1G77093	1.97821	0.0268892
AT1G77120	3.32554	0.00265413
AT1G77145	1.97929	0.016652
AT1G77200	1.80742	0.00348479
AT1G77360	1.08432	0.043878
AT1G77370	1.59511	0.000364846
AT1G77390	-1.46808	0.046465
AT1G77450	2.78285	0.00259038
AT1G77490	-3.07273	0.000198781
AT1G77510	1.20771	0.00175071
AT1G77520	1.9978	0.0249034
AT1G77570	1.21337	0.0156194
AT1G77580	2.26209	0.0135584
AT1G77600	1.12153	0.00108038
AT1G77630	-1.78274	0.00313025
AT1G77640	-2.77455	0.0168775
AT1G77690	-2.6923	0.00294728
AT1G77700	-1.57772	0.0361393
AT1G77710	1.21527	0.000898397
AT1G77760	-1.16314	0.00867327
AT1G77810	2.14541	0.0102585
AT1G77950	6.04545	0.000279579
AT1G77960	1.61347	0.0124524
AT1G77990	-1.65748	0.00258039
AT1G78000	-3.09377	0.0021948
AT1G78070	2.89551	0.00104349
AT1G78120	-2.89614	0.0344926
AT1G78170	-1.84251	0.008334
AT1G78260	-1.92564	0.0025393
AT1G78300	-1.48443	0.00131851
AT1G78430	-3.97536	0.0012109
AT1G78440	-1.94288	0.0043228
AT1G78450	-4.58184	0.00313193
AT1G78460	-2.01273	0.0175387
AT1G78476	2.09873	0.00862571
AT1G78510	1.3408	0.00288487
AT1G78530	-3.22543	0.0478175
AT1G78610	1.35987	0.000719194
AT1G78670	1.19627	0.00560036
AT1G78850	1.48163	0.0134611
AT1G78860	-2.28234	0.0141361
AT1G78865	-5.2058	0.000715994
AT1G78930	1.95302	0.0119277
AT1G78950	-2.00277	0.0167797
AT1G78960	1.24043	0.0353882
AT1G78970	-2.44583	0.00721021
AT1G78995	-1.05332	0.0169034
AT1G79090	1.0851	0.00348479
AT1G79160	1.31957	0.0062703
AT1G79180	2.60247	0.0401851
AT1G79190	1.42706	0.0186893
AT1G79260	1.69154	0.00624713
AT1G79270	2.38202	0.0079839
AT1G79280	1.18729	0.000364846
AT1G79450	1.76725	0.00432794
AT1G79500	-1.31708	0.0149693
AT1G79520	3.90351	0.000281186
AT1G79610	1.4436	0.000667863
AT1G79630	1.35046	0.0072232
AT1G79700	-2.11406	0.00235898
AT1G79720	-2.08064	0.000800435
AT1G79760	-3.37884	0.0267423
AT1G79770	-3.74298	0.00435937
AT1G79880	1.62809	0.00220251
AT1G79900	4.02788	0.00319777
AT1G79915	1.09483	0.0247709
AT1G79970	1.97888	0.0013469
AT1G80080	-1.14908	0.0138317
AT1G80090	2.90456	0.0288347
AT1G80110	2.7548	0.000520989
AT1G80130	3.9255	0.000368566
AT1G80160	5.1247	0.00942762
AT1G80280	-3.28121	0.00858711
AT1G80300	1.85804	0.000626382
AT1G80370	-2.71043	0.0194317
AT1G80380	-1.55443	0.00162556
AT1G80390	2.79789	0.000376155
AT1G80530	1.45049	0.00730365
AT1G80570	2.07741	0.00706483
AT1G80610	1.07947	0.019531
AT1G80620	1.31306	0.0237658
AT1G80690	-1.71592	0.00366989
AT1G80760	-1.50937	0.0135764
AT1G80890	1.37613	0.0325514
AT1G80900	1.43595	0.0413721
AT1G80920	-1.47136	0.00113352
AT2G01008	1.00948	0.0128275
AT2G01175	2.28257	0.00974729
AT2G01180	-1.86817	0.00371552
AT2G01270	1.47512	0.00330246
AT2G01300	-3.28619	0.00462259
AT2G01310	1.22858	0.0270736
AT2G01470	1.06206	0.0141498
AT2G01490	1.44474	0.000297577
AT2G01530	3.43741	0.0279939
AT2G01540	1.78678	0.000863311
AT2G01590	-1.73503	0.00137388
AT2G01610	-2.01224	0.0112472
AT2G01730	1.71005	0.0210845
AT2G01850	-1.49252	0.00304056
AT2G01890	3.42028	0.00421875
AT2G01910	-1.63904	0.00152147
AT2G01913	-2.9128	0.0199305
AT2G01918	-1.78524	0.00905699
AT2G01950	-1.95361	0.0143626
AT2G02060	1.26168	0.0171454
AT2G02070	-1.44211	0.00910139
AT2G02120	3.42448	0.0317745
AT2G02220	-1.28007	0.0145435
AT2G02370	1.27269	0.0127438
AT2G02390	1.57477	0.00737409
AT2G02400	-2.14112	0.0216991
AT2G02450	-1.6322	0.00343212
AT2G02500	-1.45103	0.00717906
AT2G02820	-1.70776	0.00973567
AT2G02880	1.16566	0.0490967
AT2G02930	-1.277	0.0460922
AT2G02950	-1.81719	0.0063455
AT2G03020	1.35277	0.00675917
AT2G03140	1.23749	0.00722581
AT2G03350	-2.22092	0.00177841
AT2G03670	1.11609	0.0120682
AT2G03780	1.17982	0.00194627
AT2G03820	1.16984	0.00506208
AT2G03850	3.03595	0.0487543
AT2G03890	1.64104	0.00313025
AT2G04032	-2.68047	0.00173076
AT2G04039	-1.9324	0.00129949
AT2G04170	-1.1012	0.0174191
AT2G04205	-2.53911	0.0382071
AT2G04240	2.62796	0.000364846
AT2G04350	1.58501	0.00154311
AT2G04450	-1.92572	0.0048879
AT2G04540	1.07475	0.0056712
AT2G04780	-2.96487	0.00289125
AT2G04790	-1.969	0.00228514
AT2G04795	-1.95755	0.00541513
AT2G04805	6.91179	0.00862546
AT2G04890	1.18308	0.0189201
AT2G04940	1.06257	0.00495861
AT2G05070	-2.09861	0.00152147
AT2G05075	1.07557	0.0303812
AT2G05100	-1.81527	0.00485987
AT2G05185	1.52381	0.0021744
AT2G05510	2.05235	0.0331884
AT2G05520	1.366	0.00430457
AT2G05530	1.20144	0.041179
AT2G05540	1.84893	0.00108177
AT2G05580	3.64171	0.0236718
AT2G05630	1.05184	0.00104581
AT2G05695	3.31597	0.0139881
AT2G05710	1.16371	0.00486263
AT2G05790	-2.46391	0.000280884
AT2G05810	-1.65898	0.0291281
AT2G05910	2.06098	0.0239884
AT2G06520	-1.47286	0.00109192
AT2G06845	2.06949	0.00267112
AT2G06850	-4.16286	0.000280884
AT2G06925	-2.09864	0.000467802
AT2G07170	-2.89966	0.00245585
AT2G07435	-1.84049	0.00520643
AT2G07565	-1.22812	0.0200058
AT2G07585	1.07346	0.00995441
AT2G07623	1.04452	0.00972463
AT2G07641	1.05338	0.00838816
AT2G07652	1.86847	0.0304085
AT2G07690	-1.96075	0.014152
AT2G07706	1.0008	0.0193233
AT2G07734	1.25392	0.00272425
AT2G07741	1.19234	0.00132519
AT2G07749	1.41879	0.018502
AT2G07753	1.52356	0.0257558
AT2G07756	-1.96876	0.046161
AT2G07981	4.42047	0.0149061
AT2G08175	1.57541	0.00137994
AT2G08220	-2.81606	0.000367411
AT2G08725	2.22639	0.000635362
AT2G08945	-1.99718	0.0249234
AT2G08950	-3.8778	0.00096468
AT2G09170	2.28347	0.0363821
AT2G09380	-1.84049	0.00520643
AT2G09455	2.60554	0.023408
AT2G10940	-8.35821	0.000448559
AT2G12190	2.3399	0.00389682
AT2G12400	2.45065	0.000367411
AT2G12550	1.40382	0.00180935
AT2G13290	1.38682	0.00295375
AT2G13463	2.70747	0.0236484
AT2G13610	-2.19912	0.00138577
AT2G13790	-1.92978	0.00920387
AT2G13800	-1.46875	0.0302544
AT2G13820	-4.61923	0.000730695
AT2G13840	1.03769	0.00801504
AT2G14110	1.11942	0.00449538
AT2G14365	2.06949	0.00267112
AT2G14560	-5.85254	0.00372312
AT2G14580	-2.93633	0.000860774
AT2G14878	3.00956	0.000523634
AT2G14890	-2.12473	0.0107649
AT2G15050	-1.27541	0.000680204
AT2G15080	-1.46825	0.0047174
AT2G15090	-3.51302	0.000198781
AT2G15280	-1.24244	0.0299588
AT2G15310	1.74066	0.00974188
AT2G15480	3.51523	0.000982784
AT2G15490	2.69463	0.0341769
AT2G15620	-1.30848	0.000781255
AT2G15760	-1.63939	0.00092466
AT2G15890	-1.07866	0.00397531
AT2G15970	1.18461	0.00337063
AT2G16060	-1.59849	0.0252499
AT2G16280	-1.35892	0.000527427
AT2G16430	-1.6753	0.00517857
AT2G16440	-2.2365	0.0391254
AT2G16500	-1.38206	0.00404392
AT2G16530	1.01544	0.000680204
AT2G16586	1.33498	0.00813785
AT2G16595	1.4248	0.00296457
AT2G16650	1.14306	0.00841252
AT2G16660	-3.39486	0.00298962
AT2G16700	1.51555	0.000625719
AT2G16710	1.08906	0.00202846
AT2G16720	3.13044	0.000806697
AT2G16750	-1.74238	0.0258461
AT2G16770	2.10795	0.00191941
AT2G16790	1.20682	0.045061
AT2G16850	-3.71056	0.00588224
AT2G16890	1.50375	0.00906724
AT2G16990	3.99359	0.000788447
AT2G17040	-1.23111	0.00257925
AT2G17230	-3.48102	0.000800833
AT2G17442	-1.11799	0.0102901
AT2G17570	1.07249	0.00269096
AT2G17680	4.32963	0.000255388
AT2G17770	-3.11123	0.0304949
AT2G17780	-2.75184	0.00502506
AT2G17840	1.41224	0.000597297
AT2G17880	-3.21427	0.000521428
AT2G17990	1.28875	0.00590127
AT2G18050	4.80214	0.000860774
AT2G18100	2.36693	0.00717471
AT2G18170	1.59244	0.00139246
AT2G18230	2.00632	0.00124144
AT2G18240	1.71796	0.00135831
AT2G18260	-1.29869	0.0465803
AT2G18300	-4.40947	0.000430381
AT2G18328	-3.11611	0.00127647
AT2G18540	4.23032	0.00469905
AT2G18550	2.0781	0.025691
AT2G18600	1.70116	0.011446
AT2G18650	-2.00664	0.0240512
AT2G18700	-1.97753	0.000494818
AT2G18730	-1.75664	0.0264336
AT2G18780	1.85599	0.0207331
AT2G18860	-1.13503	0.0125876
AT2G18890	-1.42359	0.00295863
AT2G18910	-2.14305	0.00132724
AT2G18950	1.55507	0.00421684
AT2G18969	-3.08209	0.0127679
AT2G19080	1.08204	0.000742554
AT2G19120	1.39809	0.0106465
AT2G19170	-3.58516	0.00109554
AT2G19310	1.6904	0.000279579
AT2G19340	2.99958	0.0115294
AT2G19540	1.04467	0.000782277
AT2G19550	2.18613	0.0494011
AT2G19590	-2.60396	0.00888758
AT2G19620	-2.81	0.0136649
AT2G19660	-2.83959	0.0317123
AT2G19670	-1.03314	0.0180116
AT2G19690	-2.13975	0.00582018
AT2G19780	-1.67216	0.00457706
AT2G19800	-6.02354	0.00664796
AT2G19810	1.95659	0.00216823
AT2G19860	2.19722	0.000580455
AT2G19880	-1.20449	0.00360949
AT2G19900	9.50776	0.00058311
AT2G19920	-3.36713	0.0238611
AT2G19970	-6.16949	0.000149107
AT2G19990	-3.66962	0.00361193
AT2G20060	1.28298	0.0027694
AT2G20142	-1.74849	0.00742628
AT2G20260	-1.3204	0.00241157
AT2G20300	-1.02656	0.0247716
AT2G20390	1.05138	0.00523879
AT2G20490	1.25269	0.000367411
AT2G20515	-1.85731	0.0469794
AT2G20560	3.03346	0.0107043
AT2G20562	-2.76729	0.00817945
AT2G20590	-3.55798	0.00388406
AT2G20670	-3.10427	0.000198781
AT2G20750	-2.72277	0.00474813
AT2G20770	2.27554	0.0014048
AT2G20870	-6.79248	0.00563547
AT2G21060	-1.21005	0.0117811
AT2G21140	-5.65369	0.000280884
AT2G21180	3.13777	0.000297577
AT2G21187	4.9674	0.00719112
AT2G21220	-3.08797	0.00669953
AT2G21260	1.10162	0.00257925
AT2G21320	2.47655	0.00253009
AT2G21385	-1.05287	0.0030952
AT2G21490	3.53114	0.00306058
AT2G21530	-1.65511	0.0110366
AT2G21540	-2.12273	0.00299884
AT2G21550	-1.53697	0.0410136
AT2G21580	1.33429	0.00152856
AT2G21590	3.34484	0.0261434
AT2G21620	1.60043	0.000781739
AT2G21650	-5.86385	0.00646811
AT2G21780	3.02935	0.0423105
AT2G21790	-1.05981	0.000688706
AT2G21820	7.33892	0.00151772
AT2G21840	-2.71097	0.0211192
AT2G21930	3.223	0.00556294
AT2G21940	1.27396	0.040094
AT2G22070	1.26979	0.0285922
AT2G22080	1.44252	0.00148337
AT2G22122	-3.62236	0.00395906
AT2G22125	-1.21925	0.00310152
AT2G22140	-1.62676	0.0249234
AT2G22170	-1.06376	0.0419481
AT2G22190	1.13913	0.0065337
AT2G22330	-1.66077	0.00708325
AT2G22420	1.60288	0.00469905
AT2G22460	-2.49305	0.00109192
AT2G22490	1.31305	0.0166131
AT2G22510	2.30524	0.00934357
AT2G22570	1.40109	0.000352433
AT2G22780	1.00357	0.000889903
AT2G22810	-1.18493	0.0305683
AT2G22821	1.59366	0.00148702
AT2G22830	-1.31059	0.0109728
AT2G22900	1.27576	0.00772461
AT2G22980	-1.06406	0.00180914
AT2G22990	-1.25558	0.00197914
AT2G23030	3.55414	0.00694247
AT2G23110	5.0542	0.0131735
AT2G23130	-3.3192	0.00120204
AT2G23170	-2.17254	0.0112608
AT2G23240	3.67292	0.000636687
AT2G23290	-3.09258	0.00869701
AT2G23320	-1.5617	0.00495764
AT2G23340	1.08997	0.0317712
AT2G23540	1.72545	0.0130194
AT2G23560	-2.23922	0.0187402
AT2G23600	-2.3319	0.00057131
AT2G23680	-1.36585	0.0213273
AT2G23690	-4.59926	0.0051895
AT2G23700	-2.39162	0.0384028
AT2G23770	-1.12899	0.0208781
AT2G23910	2.64988	0.0191708
AT2G23980	1.39567	0.000884918
AT2G23985	1.21169	0.0469794
AT2G24090	-1.35299	0.000700184
AT2G24100	1.09263	0.01574
AT2G24180	1.16105	0.0126795
AT2G24210	-3.90526	0.0126448
AT2G24270	1.08055	0.000667863
AT2G24280	1.39114	0.00462531
AT2G24395	-2.1318	0.000591623
AT2G24420	1.07397	0.00143998
AT2G24490	-2.06513	0.00220123
AT2G24570	-1.12908	0.0134611
AT2G24600	-2.88753	0.00110854
AT2G24610	-3.47167	0.00294562
AT2G24645	-2.08108	0.00225974
AT2G24692	-3.49817	0.039271
AT2G24700	-3.25657	0.0222297
AT2G24940	1.30326	0.00127647
AT2G24990	1.41484	0.000719194
AT2G25060	-5.66242	0.00149848
AT2G25080	-1.1043	0.00143622
AT2G25090	3.32371	0.0247799
AT2G25140	1.1957	0.0141305
AT2G25200	-1.89823	0.00270202
AT2G25270	-1.99778	0.0143434
AT2G25297	-2.25582	0.0434817
AT2G25450	2.20967	0.00467575
AT2G25480	-1.09101	0.0159218
AT2G25510	-2.96015	0.00057131
AT2G25570	1.09191	0.0176234
AT2G25620	2.09111	0.000813756
AT2G25625	2.88651	0.00260519
AT2G25690	1.52795	0.000367411
AT2G25735	-4.67604	0.0139822
AT2G25790	-2.22296	0.0319985
AT2G25810	-3.98391	0.00364862
AT2G25820	3.94971	0.00513966
AT2G25880	-3.43852	0.00811019
AT2G25940	4.85096	0.014529
AT2G25950	1.04937	0.00793015
AT2G25964	2.11366	0.00147615
AT2G26010	-4.39638	0.0323871
AT2G26020	-5.08843	0.0269834
AT2G26180	-2.4765	0.0122967
AT2G26190	-1.44337	0.0067271
AT2G26290	2.69017	0.0326818
AT2G26355	2.69523	0.000217769
AT2G26430	1.34719	0.0118727
AT2G26440	-2.4384	0.00243945
AT2G26520	-3.93441	0.0162139
AT2G26530	-2.89885	0.00701214
AT2G26560	-4.32844	0.00788258
AT2G26660	1.10163	0.0042072
AT2G26692	2.75531	0.00275392
AT2G26695	-2.84644	0.00577432
AT2G26730	-1.56479	0.00152118
AT2G26760	-4.38625	0.00924279
AT2G26810	1.33148	0.0169706
AT2G26860	1.33211	0.0291937
AT2G26910	-1.48442	0.00127769
AT2G27180	2.17301	0.00175071
AT2G27190	1.3932	0.00301777
AT2G27229	3.07511	0.013779
AT2G27300	6.76988	0.0406601
AT2G27402	-3.49045	0.00857719
AT2G27690	-2.0142	0.00753741
AT2G27810	-1.098	0.00303735
AT2G27820	-1.67327	0.00160596
AT2G27990	1.77225	0.0237828
AT2G28080	-1.90101	0.00379529
AT2G28190	-1.66191	0.00149736
AT2G28210	-2.88437	0.0466673
AT2G28400	1.94059	0.00043249
AT2G28410	-2.32537	0.010478
AT2G28440	3.95888	0.0131238
AT2G28470	-1.04284	0.00666903
AT2G28500	2.47037	0.00137596
AT2G28580	-2.67301	0.0130736
AT2G28605	-1.06884	0.0106428
AT2G28620	-2.78018	0.0219107
AT2G28660	-1.59875	0.00675917
AT2G28740	-2.41535	0.00115654
AT2G28790	-2.40198	0.00129204
AT2G28840	1.66193	0.000623063
AT2G28950	-4.11352	0.000280884
AT2G29090	2.31661	0.0303918
AT2G29140	1.9305	0.0016178
AT2G29170	-2.43912	0.00922976
AT2G29180	-1.12634	0.0247013
AT2G29290	-2.53345	0.000613448
AT2G29300	3.58732	0.00338362
AT2G29380	5.7051	0.0199677
AT2G29420	1.11498	0.00364715
AT2G29500	2.01383	0.0135841
AT2G29525	1.84092	0.0313075
AT2G29550	-2.48705	0.0343629
AT2G29620	3.21061	0.0257743
AT2G29640	1.2044	0.0135584
AT2G29680	-2.68368	0.0420061
AT2G29730	-1.37011	0.000798224
AT2G29890	-3.0798	0.0102678
AT2G29950	2.38318	0.00351998
AT2G29980	-1.67936	0.000406619
AT2G30000	1.32361	0.00862546
AT2G30010	-6.96804	0.00131478
AT2G30140	1.83425	0.0228954
AT2G30150	-1.15358	0.0224103
AT2G30330	1.01434	0.00299493
AT2G30370	-3.6728	0.0059408
AT2G30420	-2.14796	0.0067109
AT2G30424	-2.95378	0.00217903
AT2G30432	-5.21671	0.00221633
AT2G30480	2.89509	0.0196937
AT2G30530	1.2835	0.00368393
AT2G30550	1.98054	0.00148702
AT2G30570	-1.83213	0.000364846
AT2G30575	-1.10394	0.0498528
AT2G30650	1.81833	0.0102678
AT2G30790	1.14823	0.0216914
AT2G30930	-2.54608	0.000198781
AT2G30990	-1.44125	0.00376843
AT2G31010	-2.81027	0.00469905
AT2G31020	-2.9828	0.0168775
AT2G31060	1.23825	0.003806
AT2G31110	-1.13817	0.0190996
AT2G31130	1.51006	0.00103454
AT2G31141	1.63976	0.019047
AT2G31180	2.92038	0.0461327
AT2G31240	1.07451	0.019614
AT2G31270	-3.44269	0.0432465
AT2G31280	1.25413	0.00717471
AT2G31350	1.47471	0.0016178
AT2G31380	1.12663	0.0121228
AT2G31560	1.20679	0.024812
AT2G31585	2.20102	0.00036519
AT2G31730	-4.37709	0.000857571
AT2G31810	-1.41911	0.00344554
AT2G31880	-2.44419	0.0396708
AT2G31910	2.22885	0.00927463
AT2G31955	1.18227	0.00262183
AT2G31960	1.52743	0.000988358
AT2G31970	1.57097	0.0021636
AT2G31985	3.05233	0.00714135
AT2G31990	1.42731	0.000851166
AT2G32010	-1.34782	0.0186958
AT2G32020	-2.84521	0.0132742
AT2G32080	-1.06297	0.0152562
AT2G32090	1.71121	0.000364846
AT2G32100	-3.55962	0.0010372
AT2G32120	3.00923	0.00141542
AT2G32150	-1.02418	0.0193007
AT2G32200	-3.15763	0.0165904
AT2G32280	-1.44347	0.00553664
AT2G32295	1.06538	0.0193892
AT2G32380	-3.07249	0.00104669
AT2G32430	1.35165	0.0329619
AT2G32487	-2.36869	0.0283536
AT2G32500	-1.72691	0.00150689
AT2G32530	1.92135	0.0205323
AT2G32540	1.11895	0.00454312
AT2G32560	-1.53396	0.00194684
AT2G32640	-1.14563	0.00208925
AT2G32660	3.2902	0.0282499
AT2G32670	1.77403	0.0100161
AT2G32690	-2.93509	0.000951885
AT2G32765	-1.33472	0.0278026
AT2G32795	1.39031	0.00208633
AT2G32800	1.0332	0.0110948
AT2G32830	1.13316	0.0456375
AT2G32880	-1.29111	0.0155677
AT2G33060	1.32122	0.0278816
AT2G33070	3.51749	0.0161309
AT2G33080	5.17582	0.00895959
AT2G33280	4.14163	0.0187993
AT2G33310	1.09522	0.00217009
AT2G33330	-3.81378	0.00204975
AT2G33340	1.24312	0.000580455
AT2G33380	2.47681	0.0229565
AT2G33400	-3.32191	0.0127187
AT2G33520	3.31146	0.00565546
AT2G33560	-4.29942	0.0118435
AT2G33570	-1.13559	0.0455172
AT2G33585	1.21191	0.0166664
AT2G33590	3.35445	0.00106872
AT2G33740	1.20497	0.00486263
AT2G33793	-3.31398	0.0308427
AT2G33800	-1.21919	0.00147125
AT2G33850	-2.87693	0.00106883
AT2G34010	-2.74526	0.00859335
AT2G34060	-2.14414	0.0267717
AT2G34170	-1.38491	0.0283536
AT2G34224	2.06577	0.00539332
AT2G34260	1.42091	0.0191611
AT2G34300	-1.25154	0.014275
AT2G34310	1.14359	0.000980975
AT2G34360	-2.67613	0.0215066
AT2G34430	-6.10846	0.000296796
AT2G34510	-3.18657	0.00057131
AT2G34570	1.51841	0.0170124
AT2G34610	4.3492	0.0143823
AT2G34620	-1.96529	0.00172614
AT2G34680	-1.60296	0.0101867
AT2G34720	2.18928	0.00101528
AT2G34730	1.79627	0.000719194
AT2G34750	1.07002	0.00415916
AT2G34770	-1.25856	0.00110549
AT2G34850	4.73579	0.00579125
AT2G34900	1.04879	0.00421875
AT2G34930	-1.85549	0.00872338
AT2G35060	1.40882	0.00255653
AT2G35070	4.64799	0.000198781
AT2G35150	-1.76071	0.011305
AT2G35190	-2.3551	0.00593397
AT2G35300	7.68691	0.00857192
AT2G35343	2.70977	0.0044156
AT2G35370	-1.37879	0.00618973
AT2G35390	-1.25683	0.00369038
AT2G35550	2.31328	0.0099155
AT2G35555	2.35442	0.0118489
AT2G35585	1.6305	0.0223399
AT2G35650	-2.82116	0.0128591
AT2G35660	1.0002	0.00786962
AT2G35730	4.21421	0.0311114
AT2G35795	1.44168	0.000313426
AT2G35860	-2.13487	0.0093727
AT2G35880	-1.6388	0.0104294
AT2G35900	1.23912	0.00269096
AT2G35940	1.68209	0.0023408
AT2G35950	3.14132	0.040542
AT2G35960	-1.06694	0.0324697
AT2G36050	-5.48094	0.00110854
AT2G36070	1.25545	0.00321441
AT2G36080	1.91513	0.00738797
AT2G36090	1.36726	0.00309997
AT2G36120	-2.1914	0.00388166
AT2G36200	-3.56065	0.0200336
AT2G36220	3.146	0.00670823
AT2G36270	2.86247	0.00288487
AT2G36310	-1.544	0.000252785
AT2G36340	1.21139	0.00743018
AT2G36370	1.5307	0.0120423
AT2G36380	1.10239	0.00469905
AT2G36390	1.09265	0.00481467
AT2G36430	-1.14513	0.0141498
AT2G36460	1.51623	0.000479783
AT2G36570	-2.12013	0.00291812
AT2G36640	4.80397	0.000280547
AT2G36770	4.35974	0.0151134
AT2G36792	2.99209	0.0383815
AT2G36800	1.94694	0.0319022
AT2G36830	-3.27318	0.00052359
AT2G36840	1.02084	0.02995
AT2G36885	-3.72624	0.00225974
AT2G36895	-1.39124	0.000640545
AT2G36930	1.0895	0.00121066
AT2G36985	-4.77424	0.00240058
AT2G37025	-4.07047	0.00779165
AT2G37030	-3.07246	0.00550967
AT2G37050	-1.82359	0.0467838
AT2G37130	-4.958	0.00286405
AT2G37170	-2.4686	0.00768516
AT2G37180	-2.26374	0.0271391
AT2G37200	1.99223	0.000394258
AT2G37300	1.13689	0.0317119
AT2G37340	1.89426	0.001765
AT2G37380	-1.72316	0.0437597
AT2G37410	1.52166	0.00147842
AT2G37430	-3.28564	0.0112681
AT2G37460	-3.11767	0.00931775
AT2G37470	-1.05267	0.0430422
AT2G37520	1.11133	0.0039442
[truncated: 3,344 more rows]

## Sheet: DEGs 10b-1 
GeneID	Log2FC	FDR
AT1G01080	-1.64629	0.0120689
AT1G01110	-2.25577	0.00029996
AT1G01120	-2.53013	2.92656e-05
AT1G01160	1.39748	0.00663544
AT1G01180	-1.06392	0.00843451
AT1G01190	-4.23829	0.0106112
AT1G01210	1.41847	0.00618087
AT1G01250	4.81643	2.90961e-05
AT1G01300	-1.68498	0.000365033
AT1G01340	-2.13474	0.0361915
AT1G01370	-2.37298	0.0206285
AT1G01390	-4.4916	0.000296923
AT1G01420	1.31819	0.0198878
AT1G01470	2.76308	0.000120752
AT1G01480	4.79619	0.0154383
AT1G01500	1.58488	0.000288268
AT1G01520	5.05189	0.00187109
AT1G01600	-5.57635	0.00252872
AT1G01620	-4.90442	5.32333e-05
AT1G01640	2.369	0.000604339
AT1G01650	1.37777	0.011657
AT1G01660	1.74349	0.00341598
AT1G01700	1.40972	0.0133175
AT1G01715	1.55317	0.027278
AT1G01720	2.75549	4.18862e-05
AT1G01725	1.35274	0.000572372
AT1G01730	1.13965	0.00356422
AT1G01790	-2.60268	0.000424372
AT1G01810	2.2655	0.0403885
AT1G01900	-3.85622	0.0100859
AT1G01940	1.05759	0.0362553
AT1G02030	2.28063	0.0385825
AT1G02070	1.82652	0.00500117
AT1G02205	1.03305	0.00660076
AT1G02305	1.09657	0.0010406
AT1G02310	5.53776	0.00249347
AT1G02340	-2.56354	0.0024237
AT1G02360	-7.00526	0.000443645
AT1G02390	3.43902	0.00155524
AT1G02470	2.39545	0.000535949
AT1G02610	-1.46615	0.000245868
AT1G02620	-3.99673	0.000384731
AT1G02630	-3.56367	0.0341022
AT1G02640	-5.54691	8.1858e-05
AT1G02650	-4.42104	0.000396396
AT1G02670	-2.8607	0.00777615
AT1G02730	-4.83714	0.00116412
AT1G02770	3.95999	0.00430225
AT1G02810	-3.27625	0.00112839
AT1G02850	2.76752	7.95199e-05
AT1G02870	1.32609	0.000643153
AT1G02900	-3.53679	0.00415427
AT1G02950	-1.3748	0.00779384
AT1G02970	-2.82285	0.0448321
AT1G03010	-2.1781	0.0332943
AT1G03020	-2.42893	0.0221715
AT1G03030	1.09984	0.0192812
AT1G03070	3.36179	0.00870696
AT1G03080	1.30563	8.36583e-05
AT1G03130	-2.58883	0.000325017
AT1G03170	-2.60421	0.0435096
AT1G03220	1.78547	0.0474999
AT1G03290	1.15386	0.00192756
AT1G03310	1.05993	0.0340399
AT1G03380	1.00537	0.0028084
AT1G03457	-3.55632	0.00545927
AT1G03550	2.1669	0.00459668
AT1G03650	1.28981	0.011625
AT1G03660	-2.85053	0.0275376
AT1G03680	-1.27848	0.00785809
AT1G03746	-1.04832	0.0416428
AT1G03780	-4.53093	0.000762416
AT1G03790	5.0975	0.0399184
AT1G03850	-1.41606	0.00874975
AT1G03870	-8.01548	0.00043433
AT1G03900	1.05366	0.000779319
AT1G03940	1.23213	0.0110774
AT1G03970	1.19715	0.000912593
AT1G04020	-2.39329	0.0043575
AT1G04040	-2.74326	0.000860695
AT1G04110	-4.60203	0.00157527
AT1G04130	1.00336	0.0381874
AT1G04160	-1.54179	0.0237614
AT1G04180	-4.51487	0.0155842
AT1G04217	1.45609	0.0340112
AT1G04220	2.62285	0.000357254
AT1G04250	-2.29121	0.000464654
AT1G04277	1.20669	0.0214508
AT1G04300	1.21407	0.00067249
AT1G04360	-2.83434	0.0206553
AT1G04367	1.53164	0.0188922
AT1G04420	-1.14508	0.002984
AT1G04425	-4.30189	0.000681328
AT1G04430	-1.72221	0.00308389
AT1G04520	-5.10268	0.00116463
AT1G04530	-1.51301	0.000481759
AT1G04560	5.78073	0.00366244
AT1G04570	5.75739	0.00298544
AT1G04660	-1.81504	0.00166588
AT1G04680	-4.40386	0.000220702
AT1G04760	-2.62032	0.00651908
AT1G04820	-2.02139	0.003393
AT1G04830	2.17055	8.8176e-05
AT1G04850	1.04503	0.000264194
AT1G04945	1.16134	0.0125005
AT1G05010	-1.83368	0.00322742
AT1G05020	-2.27327	0.04145
AT1G05060	1.43565	0.00063155
AT1G05065	1.103	0.0435096
AT1G05100	3.62172	0.0280276
AT1G05133	3.41365	0.00785489
AT1G05153	-3.41	0.0012794
AT1G05170	1.56943	0.00139775
AT1G05190	-1.38357	0.00247296
AT1G05210	-4.68905	0.0106031
AT1G05237	2.42652	0.034503
AT1G05260	2.10275	0.00487791
AT1G05300	-2.01504	0.00158297
AT1G05330	4.09991	0.000748058
AT1G05340	6.39732	0.000895388
AT1G05410	1.08745	0.0125013
AT1G05420	-2.06009	0.00486013
AT1G05440	-3.60922	0.00585359
AT1G05470	-2.07138	0.00104618
AT1G05590	-1.01983	0.01603
AT1G05630	-1.93926	0.00821263
AT1G05675	-5.48381	0.000340481
AT1G05730	2.05827	0.0327592
AT1G05750	1.01838	0.0436811
AT1G05805	-1.75853	0.000737939
AT1G05810	-3.0592	0.00800922
AT1G05820	-2.32329	0.0315967
AT1G05850	-1.04758	0.00515356
AT1G05870	1.66506	0.000679341
AT1G05890	1.32478	0.000659518
AT1G05940	1.05489	0.000630282
AT1G06033	1.97232	0.00113503
AT1G06080	-7.31767	2.92656e-05
AT1G06087	1.3273	0.0100005
AT1G06090	2.35818	0.000893323
AT1G06100	-2.80757	0.0055048
AT1G06110	1.82791	4.65266e-05
AT1G06120	1.99854	0.0184971
AT1G06160	-3.51569	0.000511098
AT1G06170	-2.43443	0.00458644
AT1G06180	3.25345	0.00026797
AT1G06200	1.28833	8.07006e-05
AT1G06210	1.32872	0.0065612
AT1G06227	1.94765	0.0261008
AT1G06250	1.77488	0.0134463
AT1G06273	1.44333	0.0209819
AT1G06283	1.61196	0.00561853
AT1G06350	-3.18773	0.0227428
AT1G06360	-3.36319	0.000628868
AT1G06410	-1.12648	0.00134635
AT1G06430	1.43435	0.00063155
AT1G06440	1.9484	0.00588966
AT1G06473	4.0967	0.000164407
AT1G06537	1.10837	0.0126054
AT1G06553	1.82785	0.0014091
AT1G06570	2.22962	0.000542812
AT1G06640	-1.44351	0.0280502
AT1G06667	1.5369	0.00997296
AT1G06680	-2.62785	0.000334313
AT1G06713	-2.92113	0.0305119
AT1G06717	-1.88016	0.0229622
AT1G06720	1.10056	0.00217963
AT1G06733	2.48393	0.0329175
AT1G06780	1.05516	0.000529738
AT1G06830	-4.30175	0.000208876
AT1G06850	-1.77053	0.000484477
AT1G06910	1.26109	0.0200716
AT1G07000	-2.12484	0.00141169
AT1G07010	1.51861	0.00482702
AT1G07020	-1.08462	0.0361813
AT1G07040	1.14064	0.000350963
AT1G07050	-2.84779	0.0064078
AT1G07128	2.32631	0.0304493
AT1G07135	-3.14924	0.00105209
AT1G07150	-2.67508	0.00304813
AT1G07175	-1.88016	0.0229622
AT1G07180	-1.05819	0.0289212
AT1G07230	1.01772	0.0079568
AT1G07290	2.6212	0.000893323
AT1G07300	1.09025	0.00323109
AT1G07320	-2.16823	0.00126223
AT1G07350	2.16751	0.000125791
AT1G07370	-3.18673	0.000660694
AT1G07380	1.3861	0.00829137
AT1G07390	1.98937	0.00899229
AT1G07393	2.39887	0.0189837
AT1G07430	6.89616	9.31741e-06
AT1G07440	1.35609	0.00185277
AT1G07510	2.08654	0.00458803
AT1G07530	1.68043	0.000210438
AT1G07540	4.30998	0.00113503
AT1G07570	-1.04172	0.037807
AT1G07610	-1.25174	0.00393125
AT1G07615	1.30604	0.00272051
AT1G07645	2.45956	0.00903882
AT1G07650	-1.11834	0.00103869
AT1G07720	1.96629	0.000128421
AT1G07750	1.39323	0.00147998
AT1G07830	1.93159	0.000397339
AT1G07870	2.01734	0.000296923
AT1G07880	-2.14045	0.00727094
AT1G07900	5.30569	0.00326267
AT1G07910	1.46145	0.0019436
AT1G07957	3.77764	0.00094509
AT1G07980	1.4413	0.00746055
AT1G07985	7.21353	0.00134772
AT1G08010	-1.27587	0.00560217
AT1G08040	1.19427	0.00200608
AT1G08050	-1.15862	0.0181272
AT1G08103	2.3405	0.00676409
AT1G08110	1.5458	8.98196e-05
AT1G08160	-3.22141	0.000346955
AT1G08180	1.79669	0.000716885
AT1G08230	2.88515	0.000179915
AT1G08283	-2.0282	0.0185358
AT1G08380	-2.23027	9.28037e-05
AT1G08390	-3.27297	0.0364892
AT1G08400	1.07689	0.00635073
AT1G08440	2.10699	0.0468988
AT1G08460	1.24568	0.000360069
AT1G08507	1.07463	0.0226796
AT1G08510	-1.23083	0.00070639
AT1G08520	-1.22997	0.00133292
AT1G08540	-1.32669	0.00125343
AT1G08560	-2.99218	0.0197458
AT1G08570	1.99812	0.00023322
AT1G08573	3.03097	0.00353021
AT1G08630	3.16985	0.00291568
AT1G08640	1.1084	0.000449655
AT1G08650	2.32554	0.00251331
AT1G08733	2.48366	0.0126692
AT1G08757	-3.81745	0.000334532
AT1G08890	1.43697	0.000476243
AT1G08920	1.85581	0.0333987
AT1G08930	-2.87588	8.73125e-05
AT1G08980	-1.57032	0.0129434
AT1G09070	-1.00996	0.0330336
AT1G09087	2.54543	0.00422771
AT1G09100	1.00507	0.00563878
AT1G09140	1.85038	0.000294558
AT1G09160	-1.37696	0.0008749
AT1G09163	2.92509	0.00167149
AT1G09180	2.39469	0.0160414
AT1G09200	-3.00253	0.000469188
AT1G09220	2.80477	0.00198201
AT1G09250	-2.23865	0.000299732
AT1G09340	-3.22875	0.000779744
AT1G09390	-2.83085	0.000952662
AT1G09400	2.39219	0.0226672
AT1G09450	-2.84341	0.0155589
AT1G09460	-3.98107	0.00754312
AT1G09467	1.01988	0.0466121
AT1G09470	-3.96256	0.00043689
AT1G09500	6.49737	0.0483882
AT1G09510	3.61549	0.00106443
AT1G09530	2.78655	0.000287959
AT1G09533	2.06964	0.0499701
AT1G09575	-1.53158	0.00881751
AT1G09630	-1.13425	0.00141891
AT1G09687	1.10232	0.0197458
AT1G09693	1.9137	0.037578
AT1G09697	4.04698	0.011614
AT1G09750	-6.31171	7.64213e-05
AT1G09780	-1.4552	0.0230631
AT1G09787	1.97305	0.0129216
AT1G09794	1.03029	0.0108517
AT1G09867	2.00619	0.0014256
AT1G09930	-2.21485	0.0399905
AT1G09932	-2.50009	0.00209943
AT1G09950	2.98151	0.00480397
AT1G10020	-3.44578	5.66598e-05
AT1G10030	-1.65142	0.00843967
AT1G10040	2.38635	0.0299077
AT1G10060	-2.02027	0.00273383
AT1G10070	2.52489	0.000792901
AT1G10320	1.10691	0.00418966
AT1G10340	-3.51602	0.0296563
AT1G10350	1.07999	0.00382073
AT1G10360	-2.21671	0.00678546
AT1G10380	-1.14843	0.0141584
AT1G10460	-4.76325	0.000681016
AT1G10470	-2.31637	0.000436682
AT1G10550	-6.13712	9.21612e-05
AT1G10560	-1.87645	0.0434138
AT1G10640	-5.17105	0.00134772
AT1G10650	1.07883	0.0113773
AT1G10657	-2.00427	0.00614782
AT1G10660	1.46085	0.00134772
AT1G10682	-1.01164	0.00463345
AT1G10770	-3.36645	0.00475393
AT1G10850	-1.11043	0.0310961
AT1G10865	1.51088	0.000488016
AT1G10960	-1.73915	0.000449655
AT1G10990	-1.89793	0.00313483
AT1G11080	-1.76522	0.00999555
AT1G11112	-3.14978	0.00939493
AT1G11120	-1.68789	0.00328672
AT1G11170	2.7071	0.000403942
AT1G11175	2.12538	0.0002734
AT1G11185	-2.37675	0.00812763
AT1G11190	1.72308	0.0157824
AT1G11210	1.9393	0.00394504
AT1G11260	-5.14634	7.38133e-05
AT1G11300	2.73179	0.000439829
AT1G11340	-1.67826	0.0279483
AT1G11350	-1.02799	0.0228761
AT1G11362	-3.92973	0.000301863
AT1G11380	-1.70363	0.00189618
AT1G11410	1.61011	0.0025861
AT1G11450	-2.62625	0.0363749
AT1G11475	1.29737	0.00101625
AT1G11500	-3.1502	0.001271
AT1G11545	-5.9792	0.00333764
AT1G11580	-1.42824	0.00305041
AT1G11600	-1.81287	0.0332943
AT1G11670	-2.22661	0.0019243
AT1G11700	2.03984	0.000449655
AT1G11730	-2.33138	0.005061
AT1G11740	-5.45408	0.00140317
AT1G11785	2.75163	0.000685878
AT1G11820	-1.60395	0.00696048
AT1G11840	1.6746	7.76052e-05
AT1G11850	-5.03947	0.000100222
AT1G11860	-2.44392	0.00117037
AT1G11910	1.13451	0.000236627
AT1G11915	-1.89652	0.00730938
AT1G11990	1.92462	0.0373913
AT1G12000	-1.43287	0.0116088
AT1G12010	-2.9877	0.000934254
AT1G12013	2.27695	0.00451249
AT1G12020	-2.07632	0.00387271
AT1G12050	1.0469	0.000872929
AT1G12064	4.50201	0.00316345
AT1G12080	-3.78134	0.00062641
AT1G12090	-2.90338	2.92656e-05
AT1G12100	-3.21162	0.00501429
AT1G12110	-3.74949	8.36161e-05
AT1G12240	-1.73312	0.0102088
AT1G12280	1.52597	0.0025968
AT1G12320	-1.08532	0.00995628
AT1G12400	1.38243	0.000447135
AT1G12460	-2.34822	0.00153682
AT1G12500	-2.64214	0.000294558
AT1G12570	-5.12396	0.00255379
AT1G12650	1.19692	0.000512898
AT1G12672	4.51996	0.000444598
AT1G12710	-1.25983	0.000555838
AT1G12780	-1.15189	0.000728161
AT1G12900	-2.30471	4.99321e-05
AT1G13090	1.288	0.000449349
AT1G13100	-1.29949	0.00448571
AT1G13110	-1.83102	0.000571807
AT1G13140	1.26496	0.0308556
AT1G13180	-1.33349	0.0365347
AT1G13195	1.03483	0.0119612
AT1G13210	-1.74864	0.000250849
AT1G13250	-2.1474	0.0195155
AT1G13260	-4.99843	0.000153926
AT1G13360	1.50702	0.00124255
AT1G13420	-2.74746	0.0117757
AT1G13470	-2.04981	0.0190409
AT1G13600	1.36548	0.0217682
AT1G13610	-1.88763	0.014677
AT1G13670	-2.83403	0.00777355
AT1G13690	1.14919	0.000313172
AT1G13810	1.05616	0.0381639
AT1G13830	1.70403	0.0308661
AT1G13920	3.25202	8.36161e-05
AT1G13930	2.17139	0.000264194
AT1G13950	1.14233	0.00134187
AT1G13960	1.29542	0.00138712
AT1G13970	1.9191	0.0282845
AT1G13990	1.48072	0.00023322
AT1G14150	-2.38158	0.00335646
AT1G14250	-5.18899	0.0229929
AT1G14290	-3.43942	0.000225011
AT1G14300	1.53037	0.000504092
AT1G14340	1.17561	0.00554151
AT1G14345	-2.08491	0.000121018
AT1G14350	-1.81861	0.00284057
AT1G14430	-1.66185	0.0229622
AT1G14455	4.01891	0.000871034
AT1G14460	-2.3936	0.00600855
AT1G14520	1.70055	0.00340573
AT1G14600	1.33866	0.00708661
AT1G14630	-1.73565	0.0290914
AT1G14700	-1.32046	0.00578475
AT1G14720	1.75785	0.000352745
AT1G14730	2.7274	0.00810301
AT1G14880	-4.93976	0.00302159
AT1G14900	-1.40162	0.00622065
AT1G14920	-1.66933	0.00509114
AT1G15050	2.91087	0.027133
AT1G15085	-2.25072	0.0324722
AT1G15100	2.30956	0.000403942
AT1G15140	-1.10433	0.0008749
AT1G15175	-2.69922	0.00174572
AT1G15190	2.25544	0.0208513
AT1G15200	1.21856	0.0011756
AT1G15230	1.93761	5.15269e-05
AT1G15240	1.28218	0.00195766
AT1G15310	3.08619	0.00112511
AT1G15330	4.0671	0.00534996
AT1G15400	1.15642	0.000396756
AT1G15415	2.1772	0.00756285
AT1G15420	1.21574	0.00123112
AT1G15440	1.49073	0.00529686
AT1G15550	-1.15834	0.00520701
AT1G15570	-4.57389	0.010965
AT1G15580	1.37485	0.0406394
AT1G15670	-1.34591	0.000878086
AT1G15820	-3.57145	6.43492e-05
AT1G15830	-4.92237	0.000113543
AT1G15885	1.1577	0.00361781
AT1G15940	1.14491	0.000326459
AT1G15960	1.66081	0.00395473
AT1G15980	-1.65396	0.000650007
AT1G16030	1.55171	0.000610659
AT1G16040	1.39223	0.00066704
AT1G16070	-2.91902	0.014233
AT1G16080	-1.8782	0.00113315
AT1G16090	1.22017	0.0123225
AT1G16120	1.96557	0.0315229
AT1G16170	-1.57599	0.000512898
AT1G16260	-1.23111	0.00549444
AT1G16320	1.34246	0.000439232
AT1G16390	-5.24535	0.000114141
AT1G16410	-1.14697	0.0452559
AT1G16500	-1.12529	0.0144079
AT1G16510	1.34635	0.0089987
AT1G16515	4.49756	2.90961e-05
AT1G16540	1.45996	0.0201104
AT1G16630	-5.05854	8.15425e-05
AT1G16635	1.939	0.0177922
AT1G16640	-4.64962	0.00193301
AT1G16720	-1.37431	0.000572372
AT1G16730	1.91562	0.00321259
AT1G16740	1.31042	0.00109689
AT1G16830	1.01894	0.0453298
AT1G16850	6.03415	2.79995e-05
AT1G16880	-2.21232	0.000520784
AT1G17020	4.80808	0.00449115
AT1G17060	-1.78108	0.0159592
AT1G17065	-2.53141	0.0345805
AT1G17120	-1.66294	0.00135454
AT1G17147	-1.33068	0.0158996
AT1G17220	-1.30806	0.00113488
AT1G17345	-3.47483	0.0006147
AT1G17420	-2.51469	0.0160842
AT1G17455	-1.16247	0.00640751
AT1G17460	1.11102	0.00124677
AT1G17470	1.19827	0.000439466
AT1G17490	1.09152	0.000438749
AT1G17520	1.43023	0.0103749
AT1G17530	2.04618	2.92656e-05
AT1G17550	2.00431	6.00161e-05
AT1G17590	1.13957	0.0197561
AT1G17600	-2.22225	0.0154343
AT1G17620	-1.38411	0.00156799
AT1G17630	2.38859	0.0184968
AT1G17650	-1.73525	0.00851449
AT1G17680	1.08478	0.00461737
AT1G17700	-3.06909	0.00184987
AT1G17745	3.11285	8.1481e-05
AT1G17830	2.18659	0.00149463
AT1G17870	4.08132	0.00200964
AT1G17940	1.88429	0.000563837
AT1G17970	-1.30887	0.00506352
AT1G18000	-1.44428	0.00187045
AT1G18010	-1.42493	0.00195477
AT1G18100	5.75977	0.000463052
AT1G18140	-3.03872	0.00841715
AT1G18250	-6.99525	0.000424372
AT1G18370	-3.43424	0.00219064
AT1G18400	-4.2012	0.00152008
AT1G18550	-2.82553	0.0377236
AT1G18570	-1.44812	0.0018462
AT1G18620	-3.97095	0.000324456
AT1G18640	-1.03423	0.0484343
AT1G18650	-1.99113	0.00960943
AT1G18710	2.31138	0.00366244
AT1G18720	1.07736	0.00554142
AT1G18745	1.54444	0.000716451
AT1G18750	1.43651	0.00640226
AT1G18800	1.07524	0.0102441
AT1G18835	-3.64249	0.000650786
AT1G18840	1.86383	0.00033264
AT1G18850	1.14625	0.00067984
AT1G18870	-1.43441	0.0467282
AT1G19020	-1.51557	0.00579002
AT1G19050	-3.03288	0.000621581
AT1G19140	1.42781	0.00207803
AT1G19150	-2.88653	0.00207803
AT1G19190	1.61144	0.0242675
AT1G19200	2.64846	0.021885
AT1G19310	-1.0419	0.00185172
AT1G19320	-5.5416	0.000302101
AT1G19373	1.94114	0.00909528
AT1G19380	-3.6358	8.89889e-05
AT1G19396	2.28409	0.0388763
AT1G19397	2.67155	0.0278818
AT1G19450	-2.80025	0.000284228
AT1G19490	2.47827	0.000494703
AT1G19510	-1.37624	0.0235187
AT1G19570	1.86809	0.000660694
AT1G19630	1.2722	0.0332429
AT1G19650	1.06715	0.0022085
AT1G19670	-1.63302	0.0282881
AT1G19730	1.27712	0.000270693
AT1G19770	-1.20354	0.00148042
AT1G19780	-1.75653	0.0105606
AT1G19840	-2.34635	0.014245
AT1G19910	1.12569	0.000160534
AT1G19940	-2.67847	0.0174631
AT1G19950	-3.66834	0.0277628
AT1G19960	-2.05608	0.00821514
AT1G19990	-1.75101	0.00584042
AT1G20010	-3.94971	0.00103681
AT1G20020	-2.76216	0.00302208
AT1G20030	1.0318	0.00708661
AT1G20090	-1.21167	0.00138611
AT1G20100	1.41874	0.000222621
AT1G20140	1.21586	0.0039107
AT1G20160	2.5888	0.000448527
AT1G20190	-1.79984	0.00127481
AT1G20225	1.18407	0.000508289
AT1G20230	1.03101	0.0187607
AT1G20270	1.00938	0.00702042
AT1G20330	-2.14848	5.99219e-05
AT1G20340	-2.1806	0.000510168
AT1G20380	2.52525	0.000470344
AT1G20440	1.44592	0.0261172
AT1G20450	2.04892	0.000490082
AT1G20490	1.14142	0.0129779
AT1G20610	-3.7905	0.00991584
AT1G20780	-1.87372	0.00137806
AT1G20816	1.05857	0.0129203
AT1G20840	-1.52183	0.000561192
AT1G20930	-3.91328	0.0144116
AT1G21000	2.16912	0.000139037
AT1G21050	-3.08182	0.00430225
AT1G21060	-1.7314	0.0116755
AT1G21070	-1.67089	0.000584409
AT1G21100	-1.93368	0.0114093
AT1G21120	-1.7151	0.00552815
AT1G21160	1.4027	0.000391876
AT1G21190	1.25564	0.000670721
AT1G21240	1.1199	0.0091777
AT1G21270	-2.58915	0.00170676
AT1G21310	2.05005	0.00034326
AT1G21400	3.06598	4.65266e-05
AT1G21410	2.73457	0.000201353
AT1G21450	1.34501	0.000388359
AT1G21460	2.53579	8.07006e-05
AT1G21500	-3.41295	7.99001e-05
AT1G21520	-1.5109	0.0113812
AT1G21529	5.66321	0.00169293
AT1G21540	-3.8032	0.0155815
AT1G21640	-1.23363	0.005061
AT1G21680	1.45711	0.00023837
AT1G21750	1.73262	8.58977e-05
AT1G21780	1.08653	0.00881751
AT1G21790	2.19242	0.000403221
AT1G21830	-1.71301	0.00553457
AT1G21910	-4.54941	0.000715538
AT1G22065	1.89851	0.00355046
AT1G22110	-2.28447	0.0163789
AT1G22160	3.30465	6.77754e-05
AT1G22180	1.31539	0.00272051
AT1G22220	-2.93513	0.0422529
AT1G22280	-1.09814	0.00191063
AT1G22330	-9.81521	2.90961e-05
AT1G22360	-1.33251	0.0242999
AT1G22370	2.1391	0.000146439
AT1G22480	4.25247	0.000301737
AT1G22500	-2.3414	0.013621
AT1G22530	-2.90817	0.000173554
AT1G22550	-1.7704	0.0229383
AT1G22590	-1.63672	0.00108173
AT1G22640	1.1688	0.000464654
AT1G22650	-3.62869	0.00135319
AT1G22690	-6.16088	0.000221547
AT1G22740	-1.23165	0.00945331
AT1G22885	-1.65637	0.000592582
AT1G22900	-3.87876	0.00335044
AT1G22960	1.37097	0.027967
AT1G22985	1.35	0.0166968
AT1G22990	7.68433	0.000220103
AT1G23030	-3.17138	0.00177947
AT1G23040	1.32474	0.000518459
AT1G23080	-1.35246	0.00775586
AT1G23090	-5.41969	5.99219e-05
AT1G23120	2.02635	0.00360071
AT1G23140	1.3465	0.000864865
AT1G23190	1.36353	0.000296923
AT1G23205	-4.23837	0.000384731
AT1G23280	1.7475	0.0010406
AT1G23330	2.21022	0.00133305
AT1G23340	-2.46061	0.0187541
AT1G23350	-3.70474	0.00191681
AT1G23380	-1.22003	0.0172077
AT1G23390	-2.19816	0.000433919
AT1G23450	2.25155	0.00787747
AT1G23480	-6.49103	0.000247985
AT1G23550	1.8255	0.0384292
AT1G23710	1.36922	0.00888254
AT1G23760	-2.86128	0.0241245
AT1G23790	-3.06032	0.00730938
AT1G23800	1.76514	0.00043689
AT1G23860	1.4979	0.000246219
AT1G23870	-1.74161	0.00125343
AT1G23950	1.18603	0.000313915
AT1G24020	-3.26715	0.00227828
AT1G24120	-1.07299	0.0102514
AT1G24147	-3.1397	0.00795468
AT1G24150	-2.00045	0.00112511
AT1G24170	-2.80763	9.52974e-05
AT1G24265	1.5684	0.039958
AT1G24330	2.90962	0.00135184
AT1G24450	1.09251	0.00113488
AT1G24470	2.52413	0.000538064
AT1G24490	1.03446	0.00190781
AT1G24530	-2.28916	0.000539562
AT1G24577	-1.32254	0.00313758
AT1G24580	7.01831	0.000610264
AT1G24600	4.59938	0.00328801
AT1G24735	2.10725	0.00953932
AT1G24851	2.85359	0.0107196
AT1G25180	2.82489	0.011398
AT1G25230	-2.59559	3.36299e-05
AT1G25250	1.09642	0.0261561
AT1G25260	1.49882	9.66296e-05
AT1G25277	2.72817	0.000111429
AT1G25370	1.22562	0.0185524
AT1G25450	-4.91424	0.000100659
AT1G25510	-4.4663	0.00204582
AT1G25530	2.97639	0.000431504
AT1G26208	1.27631	0.0144415
AT1G26330	-2.93624	0.0132141
AT1G26450	1.79749	0.00351125
AT1G26540	-2.87212	0.0306703
AT1G26558	1.70881	0.00280613
AT1G26570	-1.80826	0.0160872
AT1G26590	-2.00506	0.0176265
AT1G26665	1.34368	0.00183698
AT1G26730	-1.18539	0.0454019
AT1G26761	-1.7435	0.00203902
AT1G26770	-2.16588	0.00864403
AT1G26780	-3.18307	0.00986665
AT1G26810	-1.25222	0.0292363
AT1G26945	-2.47901	0.0024658
AT1G26960	-1.40932	0.0418516
AT1G27020	-7.7541	0.0020093
AT1G27045	-3.62245	0.000609365
AT1G27130	1.27972	0.000537937
AT1G27150	2.17571	0.000120752
AT1G27170	2.95326	0.0176692
AT1G27200	2.48817	0.000256171
AT1G27210	-2.36158	0.000201353
AT1G27300	1.36085	0.000158878
AT1G27420	2.06113	0.0111203
AT1G27460	-3.03086	0.000386489
AT1G27461	4.62128	0.00111828
AT1G27470	1.74145	0.00130262
AT1G27565	1.90046	0.000119523
AT1G27752	1.31934	0.0011027
AT1G27760	1.65798	0.00831047
AT1G27980	1.07267	0.00155686
AT1G28010	-5.55532	0.000311613
AT1G28130	-2.70634	0.00829137
AT1G28190	1.2758	0.0237372
AT1G28230	1.86661	0.000242235
AT1G28260	1.9962	0.00042329
AT1G28290	-3.18519	0.00098462
AT1G28330	1.00596	0.0103228
AT1G28360	2.42948	0.0214287
AT1G28370	2.63586	0.000658195
AT1G28540	1.85168	0.00322847
AT1G28660	-1.16447	0.0253676
AT1G28670	-1.01388	0.0222519
AT1G28765	2.35698	0.00687774
AT1G28960	1.13979	0.00174273
AT1G29070	-1.73501	0.00275132
AT1G29071	-1.47455	0.00507415
AT1G29160	-1.3258	0.00406296
AT1G29230	2.97908	0.00677927
AT1G29240	2.29635	0.00174773
AT1G29270	-1.74506	0.0152503
AT1G29280	-2.85889	0.0121355
AT1G29320	1.33865	0.0134807
AT1G29330	1.87181	0.0209506
AT1G29395	1.35915	0.00117786
AT1G29418	1.59504	0.000458808
AT1G29430	-2.87478	0.000234024
AT1G29440	-2.91541	0.000904471
AT1G29450	-2.25121	0.000312046
AT1G29460	-1.55124	0.00337078
AT1G29490	-2.0438	0.0180112
AT1G29510	-2.32016	0.000975701
AT1G29520	-1.76156	0.000992397
AT1G29640	4.25126	0.00041589
AT1G29660	-2.9018	5.99219e-05
AT1G29670	-2.49744	0.000321723
AT1G29680	2.49503	0.0275254
AT1G29810	1.15329	0.00169262
AT1G29890	-1.19707	0.0106955
AT1G29910	-2.66285	0.000138333
AT1G29920	-3.70902	0.000113543
AT1G29930	-1.94919	0.000589971
AT1G29960	1.06976	0.0179186
AT1G29980	-2.08079	0.0149121
AT1G30040	-2.67222	0.00606247
AT1G30070	1.45513	0.000741548
AT1G30140	2.70478	0.00158504
AT1G30190	6.13394	0.0002251
AT1G30220	5.68541	0.00117386
AT1G30250	-2.13166	0.0152544
AT1G30280	-4.49431	0.00087118
AT1G30380	-2.60016	0.000133603
AT1G30420	-1.72772	0.0380241
AT1G30440	-1.24263	0.00436308
AT1G30500	4.35834	2.90961e-05
AT1G30520	-3.05753	0.00275394
AT1G30570	-1.49075	0.00256982
AT1G30600	-1.70246	0.0292949
AT1G30640	1.24846	0.000481006
AT1G30690	-1.8693	0.000449655
AT1G30720	-5.73154	0.000700983
AT1G30730	-5.09094	0.00023837
AT1G30880	1.55403	4.83113e-05
AT1G31120	1.17732	0.024592
AT1G31170	1.60383	8.15425e-05
AT1G31240	1.39612	0.0434318
AT1G31310	-3.69447	0.00673487
AT1G31330	-2.95349	8.98196e-05
AT1G31335	-2.30451	0.000709819
AT1G31350	-1.11457	0.0235419
AT1G31410	-1.36945	0.00304422
AT1G31420	-1.73891	0.000217624
AT1G31580	-4.5069	0.00360919
AT1G31600	1.19439	0.00113488
AT1G31690	-7.22807	8.07709e-05
AT1G31710	-2.81121	0.00145661
AT1G31750	4.9459	0.000150158
AT1G31760	1.33347	0.0119851
AT1G31790	1.73923	0.0224986
AT1G31800	-1.16658	0.00348401
AT1G31820	2.04547	0.0116961
AT1G31830	1.42585	0.00419185
AT1G31835	1.79282	0.000550161
AT1G31840	1.71911	0.0411243
AT1G31910	1.01945	0.00221918
AT1G31935	-1.12003	0.0113769
AT1G32060	-2.21054	0.000691528
AT1G32070	-1.12356	0.00451497
AT1G32080	-2.78857	0.000266281
AT1G32090	-1.91577	0.0032492
AT1G32170	-2.59642	0.00357046
AT1G32190	-1.37315	0.0277154
AT1G32200	-2.47483	0.000114141
AT1G32220	-1.63468	0.00585423
AT1G32350	3.90701	0.00718472
AT1G32450	2.62375	0.0025081
AT1G32460	-1.79147	0.00500807
AT1G32470	-2.82213	0.0019343
AT1G32520	1.25826	0.00210082
AT1G32540	-1.26036	0.00383294
AT1G32560	5.69943	0.000744786
AT1G32870	1.53012	0.00156207
AT1G32880	3.0863	0.00264879
AT1G32900	2.7659	0.000973539
AT1G32910	-2.52564	0.00946386
AT1G32990	-1.83439	0.00218829
AT1G33030	2.87846	0.0409485
AT1G33102	5.15412	6.05711e-05
AT1G33110	1.53303	0.00442043
AT1G33170	-3.66511	0.00645393
AT1G33240	-3.06929	7.25382e-05
AT1G33260	2.33334	0.0016188
AT1G33265	2.24063	0.00029489
AT1G33270	1.63658	0.000240533
AT1G33340	-2.55793	0.00233926
AT1G33360	1.28272	0.00516604
AT1G33400	1.32815	0.00482397
AT1G33415	1.35637	0.00959865
AT1G33480	2.07274	0.0271052
AT1G33490	1.62053	0.000424372
AT1G33590	-1.41189	0.000463097
AT1G33610	-4.79893	0.000186307
AT1G33700	1.68583	0.0339981
AT1G33720	-1.87302	0.0143166
AT1G33760	-3.96613	0.000676615
AT1G33770	-3.78775	0.00616457
AT1G33790	-2.66621	0.00100414
AT1G33811	-5.38737	0.000228222
AT1G33960	-1.59621	0.0199439
AT1G34000	-1.3799	8.1858e-05
AT1G34340	1.18458	0.00113969
AT1G34355	-2.39364	0.0490002
AT1G34630	1.2525	0.0219729
AT1G34640	1.17865	0.0113402
AT1G34760	-2.07863	0.00434434
AT1G35140	-4.80139	0.000364608
AT1G35180	-3.87155	0.00537308
AT1G35190	1.6651	0.000450743
AT1G35290	-1.83943	0.0165206
AT1G35310	1.20111	0.00585423
AT1G35320	1.12623	0.0033141
AT1G35350	-2.51068	0.000129476
AT1G35516	1.52264	0.000158878
AT1G35580	-1.44968	0.00118687
AT1G35680	-1.64286	0.00340192
AT1G35720	3.70904	4.74259e-06
AT1G35780	-1.71993	0.00651396
AT1G35830	-2.14013	0.00260792
AT1G35910	-2.67195	0.0405717
AT1G36050	-1.13253	0.00259858
AT1G36380	1.72997	0.0048993
AT1G36390	-1.07776	0.0006102
AT1G36730	1.16634	0.000167024
AT1G36940	-2.54556	0.00466958
AT1G37140	2.71801	0.0229539
AT1G37150	1.7975	0.0238418
AT1G38065	-1.66157	0.0168821
AT1G38131	-1.57512	0.0218742
AT1G42970	-1.61826	0.00134098
AT1G43560	-1.55899	0.000284633
AT1G43605	-2.17657	0.0440443
AT1G43670	-2.15233	6.29953e-05
AT1G43700	1.46938	0.000225011
AT1G43765	2.21367	0.00351776
AT1G43800	-4.00533	0.00341857
AT1G44000	-1.68412	0.000776194
AT1G44110	-4.60282	0.00337927
AT1G44414	1.40326	0.0366267
AT1G44575	-1.35083	0.000403221
AT1G44760	2.03024	0.00211288
AT1G44810	1.54303	8.89889e-05
AT1G44830	-3.5846	0.00154991
AT1G44900	-1.51816	0.00285306
AT1G44920	-1.88182	0.00103104
AT1G44960	1.10609	0.00235492
AT1G45010	-1.2723	0.00595064
AT1G45130	-2.48972	0.00129524
AT1G45145	1.95797	0.000422492
AT1G45150	1.34329	0.00101123
AT1G45180	-2.19094	0.0144578
AT1G45191	-1.7271	0.0265688
AT1G45201	-2.04259	0.00752692
AT1G45207	-1.50625	0.0114082
AT1G45230	1.33368	0.00141891
AT1G45249	3.84895	8.73282e-05
AT1G45474	-1.476	0.00109689
AT1G45976	1.32069	0.00117346
AT1G46480	-3.6984	0.019177
AT1G46554	2.93315	5.15269e-05
AT1G46768	2.35317	0.00127619
AT1G47210	-2.07404	0.00098711
AT1G47290	-1.58708	0.00335852
AT1G47370	-1.64399	0.0187502
AT1G47510	2.71552	0.023278
AT1G47560	1.0101	0.011213
AT1G47570	2.64428	0.00194805
AT1G47655	-1.68846	0.0252128
AT1G47670	-1.14649	0.0100425
AT1G47710	1.7453	0.000498218
AT1G47740	-1.40269	0.00135184
AT1G47820	1.87434	7.95199e-05
AT1G47840	-3.67646	0.0115011
AT1G47960	3.05043	2.90961e-05
AT1G47980	5.41811	0.00148042
AT1G48000	5.92239	0.00134834
AT1G48210	-1.34117	0.00436756
AT1G48300	1.24545	0.00599192
AT1G48310	1.29421	0.00431269
AT1G48315	-2.53949	0.00750283
AT1G48350	-1.21587	0.0136126
AT1G48370	2.26253	0.00747431
AT1G48380	1.09795	0.0253356
AT1G48405	2.88805	0.00200169
AT1G48480	-4.57911	0.000584495
AT1G48500	2.87968	0.000415744
AT1G48540	1.14584	0.00491048
AT1G48590	2.42483	0.0183721
AT1G48600	-1.37882	0.0216288
AT1G48610	-2.27343	0.000913992
AT1G48630	-1.14682	0.0063605
AT1G48745	1.16583	0.00348462
AT1G48770	-1.20546	0.0104195
AT1G48840	1.26552	0.00616179
AT1G48920	1.45963	0.000504359
AT1G48970	-1.20243	0.00537963
AT1G49000	-1.76385	0.000777808
AT1G49130	-1.13327	0.0204658
AT1G49170	1.09061	0.0159523
AT1G49200	2.12644	0.00705958
AT1G49210	-3.66098	0.00469417
AT1G49230	-2.41366	0.000228539
AT1G49320	-1.59413	0.0398896
AT1G49430	-2.0369	0.0248223
AT1G49450	2.15573	0.000362218
AT1G49470	-1.38052	0.0031018
AT1G49490	-1.8213	0.0136832
AT1G49540	1.32672	0.00397015
AT1G49560	1.68699	0.00349366
AT1G49660	1.50793	0.000318527
AT1G49670	1.15506	0.0118276
AT1G49700	1.68981	0.0014889
AT1G49730	-3.57382	0.00752146
AT1G49750	-4.70071	0.00076846
AT1G49870	-3.29436	0.0126262
AT1G49920	-2.5834	0.0265944
AT1G49960	2.77367	0.0143004
AT1G49975	-1.57912	0.000277869
AT1G50010	-3.19128	0.000549666
AT1G50040	-5.37378	0.00226959
AT1G50055	1.22831	0.00260485
AT1G50240	-2.98536	0.00820308
AT1G50260	2.09235	0.00704723
AT1G50290	1.32878	0.00619536
AT1G50320	-1.71193	0.000422492
AT1G50380	1.47266	0.000495603
AT1G50420	1.85971	0.00018973
AT1G50460	-1.97186	0.0011078
AT1G50520	1.85938	0.0199911
AT1G50630	1.87265	0.000437963
AT1G50732	-2.18198	0.00540738
AT1G50900	-2.45179	0.0159426
AT1G50930	5.39277	0.000313484
AT1G50950	2.05571	0.0130594
AT1G51060	-1.26664	0.000684377
AT1G51090	2.62871	0.000658195
AT1G51110	-1.59176	0.0032645
AT1G51140	5.28204	2.92656e-05
AT1G51200	1.4991	0.000119181
AT1G51270	-1.71122	0.00765809
AT1G51380	2.09233	0.0200491
AT1G51570	-1.28941	0.00865793
AT1G51580	-1.4774	0.0028067
AT1G51610	-1.00619	0.00181843
AT1G51730	1.14625	0.00103177
AT1G51780	-3.21672	0.00375198
AT1G51805	-3.00599	5.54795e-05
AT1G51820	-3.61436	0.00371775
AT1G51940	-2.50455	0.000407122
AT1G52000	2.84645	0.00584194
AT1G52040	2.89623	0.00529013
AT1G52080	2.42087	0.00637791
AT1G52100	1.99854	0.0184971
AT1G52140	-3.68159	0.00169101
AT1G52190	-3.91634	0.00121667
AT1G52200	-4.05776	0.00140103
AT1G52220	-2.56754	4.83113e-05
AT1G52230	-3.11563	8.98196e-05
AT1G52245	-3.24951	0.0180164
AT1G52280	-1.5817	0.000894143
AT1G52290	-4.06564	0.000100659
AT1G52510	-2.68527	0.000974145
AT1G52565	4.06923	0.00930315
AT1G52570	2.96883	0.0093899
AT1G52590	1.66265	5.15269e-05
AT1G52600	1.04544	0.000448693
AT1G52690	12.404	0.00125001
AT1G52700	-4.74924	0.00711736
AT1G52720	-1.16806	0.0144415
AT1G52750	-3.98276	0.00696677
AT1G52770	-1.72947	0.0122069
AT1G52820	2.10856	0.00122954
AT1G52830	-3.84169	0.0148417
AT1G52855	2.29616	0.000893323
AT1G52890	3.00719	0.000276282
AT1G52905	1.68336	0.000482411
AT1G52980	1.25066	0.000644237
AT1G52990	2.09566	0.0297704
AT1G53000	1.46057	0.000432552
AT1G53030	1.50899	0.000892604
AT1G53090	2.2622	0.00127347
AT1G53100	2.03226	0.0179733
AT1G53140	-3.95388	0.00209943
AT1G53160	1.77356	0.00908239
AT1G53163	-2.45741	0.00934581
AT1G53170	1.57199	0.0105777
AT1G53200	1.02633	0.024608
AT1G53230	-2.09548	0.0011371
AT1G53240	-1.30935	0.00357739
AT1G53280	1.788	0.000217733
AT1G53290	-1.29367	0.0238604
AT1G53350	-1.5408	0.0175716
AT1G53390	-1.02771	0.020821
AT1G53430	-1.79016	0.00272586
AT1G53460	1.31643	0.000775284
AT1G53470	3.18986	0.019771
AT1G53520	-5.04846	0.000343105
AT1G53540	5.85729	0.0187706
AT1G53580	1.37899	0.000572033
AT1G53590	1.08927	0.00114305
AT1G53655	2.75349	0.0144415
AT1G53680	2.21858	0.0414868
AT1G53690	-3.42855	0.00594706
AT1G53720	1.27182	0.000406614
AT1G53730	-2.83139	0.0367653
AT1G53760	1.06484	0.043714
AT1G53780	1.62669	0.000125791
AT1G53790	1.81183	0.00343403
AT1G53830	-1.97556	0.0201125
AT1G53840	-1.68151	0.000708108
AT1G53887	2.07519	0.000692485
AT1G53910	1.07482	0.00289587
AT1G53920	-3.04622	0.0217771
AT1G54000	-3.89375	0.00741742
AT1G54010	-5.58795	0.00478777
AT1G54100	3.34689	0.000150014
AT1G54120	1.58748	0.00176623
AT1G54160	3.60508	0.000345905
AT1G54180	1.4328	0.0108574
AT1G54217	-2.58101	0.000701764
AT1G54260	1.50662	0.00819848
AT1G54290	1.00943	0.00189618
AT1G54385	-3.76585	0.0234641
AT1G54410	1.23671	0.000385033
AT1G54540	1.98147	0.0310864
AT1G54570	1.01217	0.00229554
AT1G54575	4.03048	6.23905e-05
AT1G54740	-1.4206	0.00043689
AT1G54780	-1.03769	0.00475351
AT1G54820	-3.17361	0.000918502
AT1G54860	3.52684	0.0225646
AT1G54870	7.44558	0.0229435
AT1G55010	-3.7241	0.00988407
AT1G55040	1.32572	0.00343903
AT1G55050	2.41124	0.00506712
AT1G55080	1.46036	0.00175868
AT1G55110	1.36375	0.00211073
AT1G55160	-1.86595	0.00108819
AT1G55180	1.07979	0.00292499
AT1G55200	-3.22594	0.00251729
AT1G55260	-1.79621	0.000250849
AT1G55280	1.23358	0.0246396
AT1G55310	1.74381	0.000892604
AT1G55320	1.65291	0.0469051
AT1G55330	-2.57421	0.0126262
AT1G55360	-1.43915	0.0129211
AT1G55370	-1.56208	0.000229678
AT1G55380	-2.37223	0.0197561
AT1G55390	-1.88813	0.0384056
AT1G55450	-1.43211	0.00112728
AT1G55480	-1.66953	0.000143952
AT1G55490	-1.29013	0.0384186
AT1G55530	1.02376	0.000584186
AT1G55670	-2.79112	0.000238588
AT1G55675	1.16293	0.000369293
AT1G55680	1.34184	0.00011381
AT1G55760	1.78337	0.00995109
AT1G55810	-1.4943	0.00640226
AT1G55920	1.66312	0.00966112
AT1G55990	3.55674	0.0165896
AT1G56010	1.32235	0.00546223
AT1G56190	-1.47263	0.0096868
AT1G56230	1.23316	0.000881087
AT1G56240	-2.29934	0.0297107
AT1G56280	1.3311	7.59725e-05
AT1G56430	-3.78877	0.00430873
AT1G56500	-1.50108	0.000663428
AT1G56520	-1.03639	0.0215041
AT1G56600	4.87233	2.942e-05
AT1G56610	3.72424	0.000604339
AT1G56650	4.23171	0.000294558
AT1G56660	1.50602	0.0318176
AT1G57590	5.87183	0.000250849
AT1G57680	-1.55598	0.000100659
AT1G57770	-1.57741	0.00946581
AT1G57820	-2.73027	0.00203443
AT1G57980	-1.3574	0.0102494
AT1G57990	-3.16573	0.00666208
AT1G58030	1.13401	0.000271558
AT1G58070	-1.26726	0.0116755
AT1G58080	-1.07507	0.000700983
AT1G58110	-1.08239	0.00653182
AT1G58190	-2.38523	0.0290184
AT1G58235	1.37598	0.000213788
AT1G58270	2.93809	0.000140315
AT1G58290	-2.11508	0.000858805
AT1G58360	2.15291	0.000159833
AT1G58370	-2.635	0.0062318
AT1G58440	-2.05193	0.000334532
AT1G58520	1.81461	0.00375592
AT1G58590	1.13174	0.000918502
AT1G58602	-1.31662	0.0148533
AT1G59530	2.0489	0.0311813
AT1G59560	-1.31008	0.00756512
AT1G59590	-1.41154	0.00149671
AT1G59640	2.80422	0.000909136
AT1G59700	1.57218	0.000212749
AT1G59840	-1.49665	0.0246524
AT1G59870	-1.43876	0.000255126
AT1G60060	-2.18846	0.00283239
AT1G60190	5.33601	7.84082e-05
AT1G60390	-1.70715	0.0361135
AT1G60420	1.49789	0.000234024
AT1G60470	5.11144	0.00586754
AT1G60550	-1.73374	0.00268528
AT1G60590	-4.86884	0.00201581
AT1G60600	-1.20645	0.00216179
AT1G60610	1.68785	0.00131053
AT1G60620	1.60649	0.00361903
AT1G60660	-1.41863	0.00158384
AT1G60680	4.0553	0.000835206
AT1G60710	1.34863	0.000129043
AT1G60730	1.31042	0.00738702
AT1G60800	-2.08262	0.000788378
AT1G60900	1.04969	0.0103744
AT1G60950	-2.28545	0.000174435
AT1G60960	-1.72136	0.0106801
AT1G60970	6.63373	0.00010923
AT1G60989	1.86965	0.00100414
AT1G61100	-1.76618	0.00133292
AT1G61170	-2.28767	0.000836498
AT1G61340	1.71707	0.0400039
AT1G61360	-1.12949	0.0130752
AT1G61460	1.83039	0.0144729
AT1G61520	-1.77587	0.000210228
AT1G61590	2.17307	0.00974729
AT1G61620	1.47602	8.07006e-05
AT1G61740	-1.61897	0.0176729
AT1G61795	-2.28676	0.0139225
AT1G61800	5.2641	0.00980692
AT1G61870	1.02285	0.00961591
AT1G61890	1.73681	0.00250385
AT1G61900	-1.42079	0.000589971
AT1G61970	1.19186	0.0178796
AT1G62030	1.61413	0.00770768
AT1G62040	1.01928	0.000254413
AT1G62130	1.26892	0.00447616
AT1G62290	3.26698	0.00023322
AT1G62305	1.32128	0.0187232
AT1G62370	2.45771	0.00892643
AT1G62380	-3.0791	9.32936e-05
AT1G62420	-2.22314	0.0368136
AT1G62440	-5.06139	0.00200759
AT1G62480	-3.36164	5.15269e-05
AT1G62500	-6.1363	0.000659392
AT1G62510	2.33998	0.000735415
AT1G62520	-2.82144	0.00467208
AT1G62540	2.08808	0.00740366
AT1G62570	3.29518	0.000299988
AT1G62620	4.42482	0.000718046
AT1G62630	-1.28078	0.0226641
AT1G62640	-1.40556	0.00269264
AT1G62710	3.66204	7.95199e-05
AT1G62750	-1.41827	0.000913732
AT1G62780	-1.19523	0.000628868
AT1G62790	-1.3682	0.000871864
AT1G62810	2.21434	0.00023322
AT1G63010	1.59006	0.000871864
AT1G63057	1.47748	0.0498273
AT1G63100	-2.73468	0.00561401
AT1G63220	-2.24456	0.001533
AT1G63245	2.82947	0.0116755
AT1G63260	-3.64687	0.000297594
AT1G63300	-1.18809	0.0148373
AT1G63310	-1.90644	0.00389205
AT1G63370	3.4537	0.00126324
AT1G63380	1.10993	0.0236585
AT1G63420	1.78751	0.00029561
AT1G63470	-1.70595	0.0047895
AT1G63480	-1.71998	0.00344757
AT1G63570	1.9562	0.0289502
AT1G63690	-1.4376	0.000473102
AT1G63710	-4.77317	0.00149264
AT1G63720	2.02593	0.0076265
AT1G63840	1.73687	7.34355e-05
AT1G64010	2.17307	0.00974729
AT1G64080	1.28052	0.0223837
AT1G64110	9.33827	0.000113543
AT1G64170	-4.49286	0.00275447
AT1G64200	-2.92309	0.00289184
AT1G64253	1.15954	0.0221065
AT1G64280	-1.17963	0.00191047
AT1G64320	3.09419	0.0434299
AT1G64350	1.28582	0.000949587
AT1G64370	1.28112	0.000154165
AT1G64405	2.72991	0.0157232
AT1G64490	1.57563	0.000235278
AT1G64510	-2.17418	0.000763765
AT1G64550	1.01154	0.000730531
AT1G64600	1.31583	0.0197508
AT1G64625	-2.98568	0.000792901
AT1G64640	-2.87897	0.00218829
AT1G64660	3.16158	0.000406593
AT1G64670	-2.20357	0.000609162
AT1G64690	1.90838	0.0033807
AT1G64750	1.03608	0.000450743
AT1G64760	-1.83348	0.0059849
AT1G64770	-1.33331	0.00118734
AT1G64795	3.36672	7.95199e-05
AT1G64810	1.54188	0.000403221
AT1G64820	2.42016	0.00224492
AT1G64900	1.33346	0.00787394
AT1G64940	1.57596	0.00184024
AT1G64950	2.53926	0.00023837
AT1G64970	1.74555	0.000137724
AT1G65000	1.17755	0.00114756
AT1G65010	-1.93735	0.0189798
AT1G65040	1.43904	0.000314316
AT1G65060	-1.384	0.041048
AT1G65090	2.92234	0.0330878
AT1G65120	2.39842	0.0457808
AT1G65230	-2.57078	0.00214327
AT1G65240	-3.20015	0.000900406
AT1G65280	1.61607	0.000303479
AT1G65295	-1.57519	0.000140315
AT1G65330	-3.70978	0.000451915
AT1G65390	-7.32571	0.000358146
AT1G65450	-3.76414	0.00279127
AT1G65470	-2.33925	0.00361771
AT1G65484	-2.90313	0.0144112
AT1G65486	-4.33272	0.00191741
AT1G65490	-2.06413	0.000788117
AT1G65590	-3.75058	0.000641854
AT1G65620	-1.64227	0.0103597
AT1G65660	1.87151	0.000119181
AT1G65690	2.1847	0.00060729
AT1G65710	-4.38779	0.00265429
AT1G65790	-1.19292	0.045263
AT1G65845	-4.78123	0.0013937
AT1G65890	3.52677	0.00139769
AT1G65980	1.82267	5.15269e-05
AT1G66020	2.43814	0.0238701
AT1G66050	-1.49713	0.0245229
AT1G66060	-2.5458	0.0134355
AT1G66090	-2.7892	0.00126745
AT1G66100	-9.75066	0.00025846
AT1G66150	-2.03078	0.00028747
AT1G66180	-2.58384	8.1066e-05
AT1G66190	-3.14792	0.00214938
AT1G66200	-1.66055	8.36583e-05
AT1G66230	-1.8892	0.00483639
AT1G66240	1.8463	5.32333e-05
AT1G66320	-2.06405	0.00868673
AT1G66350	-2.55687	0.00138772
AT1G66390	6.93804	5.99219e-05
AT1G66410	1.04431	0.000125128
AT1G66465	-3.75805	0.0237372
AT1G66500	1.69061	0.0242599
AT1G66550	2.3405	0.00676409
AT1G66590	1.05022	0.0027196
AT1G66700	2.26136	0.0476517
AT1G66840	1.58122	0.0169921
AT1G66890	1.69221	9.75177e-05
AT1G66920	-1.76192	0.00348172
AT1G66930	-5.79289	0.000290475
AT1G66940	-5.30079	0.00186857
AT1G66970	-2.86723	0.00473799
AT1G66980	-1.00719	0.041421
AT1G67020	1.74932	0.034473
AT1G67025	1.68335	0.0362713
AT1G67090	-3.87696	0.000268334
AT1G67180	-3.06122	0.00480397
AT1G67260	-1.29185	0.0164033
AT1G67300	2.51547	5.66598e-05
AT1G67340	1.56767	0.00146877
AT1G67360	3.48186	2.90961e-05
AT1G67365	3.95679	3.36299e-05
AT1G67470	-1.19333	0.0487538
AT1G67480	-1.68163	0.0143361
AT1G67500	1.02075	0.00571938
AT1G67590	1.43744	0.00216179
AT1G67650	1.61221	0.0345021
AT1G67700	-1.091	0.00468241
AT1G67740	-3.37842	0.000486948
AT1G67750	-4.47244	8.36161e-05
AT1G67780	-1.89652	0.00730938
AT1G67810	-2.09536	0.00446144
AT1G67820	1.76373	0.00505894
AT1G67830	-1.4696	0.0115702
AT1G67840	-1.04853	0.00619261
AT1G67850	1.13655	0.00828243
AT1G67856	2.34002	0.0383202
AT1G67860	-1.29392	0.00112511
AT1G67865	-1.23333	0.00135236
AT1G67880	1.05187	0.00229844
AT1G67900	-1.18938	0.00570315
AT1G67910	-2.80268	0.00519542
AT1G67920	5.54503	8.36583e-05
AT1G67960	1.05292	0.00820629
AT1G68010	-1.03618	0.0282848
AT1G68060	-1.00184	0.00196078
AT1G68110	-3.18782	0.0024744
AT1G68238	-3.49142	0.0022085
AT1G68240	-3.06884	0.0158806
AT1G68250	6.31143	0.00533909
AT1G68320	2.46011	0.00892938
AT1G68330	-4.80621	0.00329249
AT1G68340	1.32945	0.00200964
AT1G68400	-2.71648	0.0019372
AT1G68450	4.1425	0.0172984
AT1G68470	2.01996	0.0114852
AT1G68500	2.96163	0.00197578
AT1G68520	-1.36166	0.00716024
AT1G68560	-2.01164	0.00118582
AT1G68570	2.70036	3.80307e-05
AT1G68585	-1.71942	0.000334532
AT1G68590	-1.61038	0.000909963
AT1G68610	3.58756	0.00461737
AT1G68620	1.48176	0.0366852
AT1G68640	2.80583	0.0307809
AT1G68700	1.66253	0.0215222
AT1G68725	-2.26656	0.00461239
AT1G68765	4.24349	0.0253356
AT1G68780	-2.14375	0.00660494
AT1G68795	2.15974	0.0284147
AT1G68800	-4.01091	0.0261196
AT1G68840	-4.4802	0.00014633
AT1G68890	-1.41398	0.0211624
AT1G68990	1.24415	0.0135022
AT1G69030	-2.03319	0.000918502
AT1G69040	-2.1161	0.000561192
AT1G69070	1.09124	0.00225119
AT1G69080	-2.70082	0.00141496
AT1G69160	-2.22941	0.00128652
AT1G69252	3.04025	2.90961e-05
AT1G69260	2.87705	8.18639e-05
AT1G69270	1.91482	0.000217624
AT1G69295	2.55197	2.942e-05
AT1G69330	-1.57858	0.0165919
AT1G69360	1.04567	0.00773918
AT1G69370	-1.49793	0.0459946
AT1G69410	1.9084	0.000245934
AT1G69420	-1.47291	0.0302902
AT1G69430	1.76157	0.00415073
AT1G69480	3.53466	0.0115538
AT1G69490	2.38775	8.07006e-05
AT1G69523	-1.88897	0.0132027
AT1G69530	-4.49038	0.000110696
AT1G69540	3.56523	0.00642796
AT1G69610	2.77615	0.00060506
AT1G69640	1.21869	0.00117147
AT1G69690	-1.14245	0.0195191
AT1G69700	-1.86932	0.000775364
AT1G69740	-1.19342	0.000334532
AT1G69770	-1.73641	0.00418364
AT1G69780	-2.26722	0.00155218
AT1G69790	4.01523	0.000414989
AT1G69800	1.57218	0.00334663
AT1G69890	-1.11447	0.00414487
AT1G69900	-4.1861	0.000188546
AT1G69930	3.03895	0.00766896
AT1G70000	1.38513	0.00741742
AT1G70090	-2.79423	0.000129476
AT1G70160	1.66165	6.90446e-05
AT1G70270	-5.06485	0.000569843
AT1G70280	-1.65752	0.0405036
AT1G70300	3.34049	0.000612912
AT1G70360	2.15092	0.0102946
AT1G70370	-1.96231	0.000158879
AT1G70410	-2.66586	0.00201358
AT1G70430	-2.74854	0.00613622
AT1G70470	-2.178	0.010446
AT1G70510	1.27491	0.0265389
AT1G70518	1.19755	0.000508289
AT1G70550	-1.49286	0.032629
AT1G70560	-1.04858	0.0339981
AT1G70640	2.96394	8.36583e-05
AT1G70650	1.65701	0.0351579
AT1G70690	-2.99212	0.00201581
AT1G70700	-1.85024	0.00137228
AT1G70710	-2.73689	0.0193179
AT1G70720	3.035	0.0112342
AT1G70800	2.24084	0.00141169
AT1G70810	1.53185	0.0082149
AT1G70820	-3.7609	5.23992e-05
AT1G70880	-2.22291	0.00240966
AT1G70895	-1.15093	0.0433579
AT1G70900	1.35319	0.000528537
AT1G70920	3.32064	0.00111624
AT1G70990	-3.63673	0.028779
AT1G71000	5.67073	0.00439812
AT1G71015	-2.56893	0.00242071
AT1G71020	-2.00947	0.000149388
AT1G71030	-2.00331	0.00275447
AT1G71090	1.44615	0.000651321
AT1G71110	1.90926	0.00063155
AT1G71230	1.08528	0.0446074
AT1G71260	1.97057	0.00118978
AT1G71310	1.12863	0.00341857
AT1G71330	2.93249	0.00157096
AT1G71340	2.26012	8.1858e-05
AT1G71350	1.28874	0.0111637
AT1G71360	2.44564	0.000979312
AT1G71500	-1.1008	0.00553265
AT1G71695	1.09084	0.000203818
AT1G71730	1.15528	0.000587956
AT1G71830	-2.53798	0.0422781
AT1G71840	1.18893	0.000504359
AT1G71860	-1.11292	0.00265523
AT1G71866	-2.44077	0.0227476
AT1G71880	-1.89852	0.00259183
AT1G71910	2.07143	0.000674528
AT1G71950	1.3577	0.000606726
AT1G71970	-1.30275	0.000504359
AT1G71980	1.39189	0.000213788
AT1G72040	1.41069	0.00158376
AT1G72100	3.94569	0.00133292
AT1G72120	2.19968	0.000186665
AT1G72150	-1.3571	0.000311613
AT1G72180	-1.4679	0.00031291
AT1G72210	1.09994	0.0101953
AT1G72230	-1.18988	0.0113812
AT1G72240	1.98529	0.00758785
AT1G72250	-3.74132	0.0013937
AT1G72260	1.76475	0.0389623
AT1G72416	-5.48446	0.000114141
AT1G72430	-2.64139	0.000271558
AT1G72450	-1.48348	0.00447409
AT1G72510	1.46236	0.000625657
AT1G72610	-7.11548	0.000604339
AT1G72620	-4.3596	0.000871034
AT1G72640	-1.24594	0.00340573
AT1G72650	1.08068	0.00351776
AT1G72660	3.64031	0.00166456
AT1G72670	-3.91922	0.000566519
AT1G72680	1.35188	0.000684377
AT1G72690	1.92579	0.00102154
AT1G72700	2.30002	0.000174619
AT1G72720	1.54148	0.0107075
AT1G72730	-2.11535	0.0136832
AT1G72770	4.41646	5.13597e-05
AT1G72830	2.72238	0.000458808
AT1G72910	-1.56534	0.0305132
AT1G72920	-1.49218	0.040535
AT1G72930	-2.24681	0.00704136
AT1G72940	-1.03799	0.0310421
AT1G72970	-2.41786	0.00062525
AT1G73010	3.16122	0.00135195
AT1G73020	-2.22801	0.0122305
AT1G73040	3.19538	0.00148042
AT1G73110	-2.0214	0.00126324
AT1G73130	1.50558	0.0225173
AT1G73177	1.15078	0.00818511
AT1G73220	3.25065	0.0076683
AT1G73325	-1.72132	0.0296525
AT1G73380	1.20332	0.0027196
AT1G73390	3.0036	0.000200641
AT1G73400	1.13878	0.0305616
AT1G73550	-2.70346	0.00231041
AT1G73590	-1.44173	0.00428301
AT1G73600	-3.24701	0.000403942
AT1G73620	-3.17479	0.00142304
AT1G73655	-1.73575	0.00687857
AT1G73680	2.37431	0.000161941
AT1G73687	3.35764	0.0374606
AT1G73760	-1.16203	0.0352623
AT1G73805	-1.21612	0.0459188
AT1G73810	2.66162	0.00330043
AT1G73830	-1.82411	0.00135847
AT1G73910	2.78307	0.0289367
AT1G73980	1.13252	0.000722907
AT1G74010	3.0359	0.0270922
AT1G74020	2.11476	0.0358518
AT1G74070	-1.70831	0.000977966
AT1G74230	1.08341	0.00216179
AT1G74440	-1.87861	0.0109711
AT1G74560	1.64899	0.00111828
AT1G74670	-5.79174	0.00136019
AT1G74675	-4.06863	0.00109689
AT1G74690	-1.99609	0.0010683
AT1G74730	-1.81079	8.88251e-05
AT1G74790	-1.42701	0.00299289
AT1G74890	-4.32789	0.00406198
AT1G74910	-1.69164	0.00279976
AT1G74950	-1.02162	0.00601547
AT1G74970	-1.19042	0.00261459
AT1G75030	-2.30202	0.000898948
AT1G75050	-2.70867	0.00140644
AT1G75110	1.81321	0.00206086
AT1G75150	-1.97228	0.0172777
AT1G75166	1.14035	0.000886378
AT1G75170	1.86661	0.00631232
AT1G75180	-1.29858	0.000444255
AT1G75190	-1.18338	0.00215507
AT1G75220	-1.46206	0.000138333
AT1G75250	-5.74054	0.000728338
AT1G75280	-1.52886	0.000673421
AT1G75290	2.26129	0.00843393
AT1G75300	1.51629	0.0209595
AT1G75380	-1.47525	0.000929621
AT1G75390	1.20025	0.00320288
AT1G75400	1.58321	0.000148641
AT1G75420	1.02634	0.027483
AT1G75450	-3.27584	0.0206206
AT1G75500	-2.37921	0.00592761
AT1G75590	-3.98217	0.00023837
AT1G75600	4.12043	0.027141
AT1G75630	1.28169	0.000308311
AT1G75640	-3.6551	0.00703151
AT1G75670	1.59919	0.00854531
AT1G75680	-2.01583	0.00593675
AT1G75690	-2.90563	6.2552e-05
AT1G75720	-2.56129	0.0216233
AT1G75750	-5.8536	3.26226e-05
AT1G75810	2.07782	0.000660694
AT1G75820	-2.36293	0.00193458
AT1G75830	2.39071	0.00566524
AT1G75840	-1.39137	0.000199341
AT1G75960	-3.71002	0.000454302
AT1G76060	1.38468	0.00581914
AT1G76080	-2.1902	3.36299e-05
AT1G76090	-3.55816	0.000120475
AT1G76100	-1.42739	0.000566519
AT1G76160	-3.38947	2.92656e-05
AT1G76185	1.3738	0.000270693
AT1G76210	2.36287	0.04145
AT1G76240	-6.28736	0.000201124
AT1G76300	1.02324	0.00192756
AT1G76310	-4.56621	0.00855296
AT1G76405	-1.10643	0.00199722
AT1G76410	-1.95301	0.000781916
AT1G76470	3.62768	0.0117546
AT1G76540	-3.25819	0.0030342
AT1G76560	1.15213	0.000403221
AT1G76570	1.09942	0.00783529
AT1G76580	1.53583	0.000446081
AT1G76590	2.34989	7.65834e-05
AT1G76680	-1.50583	0.000578613
AT1G76720	1.40009	0.00103104
AT1G76740	-3.73541	0.000952706
AT1G76800	-1.43909	0.00254501
AT1G76820	1.57903	0.000138692
AT1G76860	1.05514	0.00280888
AT1G76870	-1.76004	0.0185372
AT1G76890	-1.91189	0.000641084
AT1G76960	2.46653	9.89986e-05
AT1G76980	3.01051	0.000560176
AT1G76990	-1.43629	0.000414989
AT1G77000	1.15902	0.00119566
AT1G77060	-1.36029	0.00234512
AT1G77093	1.93736	0.011398
AT1G77120	3.67073	0.000363382
AT1G77145	2.05379	0.00153238
AT1G77200	2.06537	0.0437128
AT1G77370	1.6198	6.05711e-05
AT1G77450	3.29948	4.99321e-05
AT1G77490	-3.17222	0.000383526
AT1G77510	1.33217	0.00740205
AT1G77520	2.42217	0.00429425
AT1G77570	1.34616	0.0359239
AT1G77580	1.6678	0.00416208
AT1G77630	-1.28389	0.0110987
AT1G77640	-4.1068	0.00697001
AT1G77690	-4.68362	0.00103474
AT1G77710	1.38434	8.07006e-05
AT1G77760	-1.71765	0.000172613
AT1G77810	1.87415	0.00171591
AT1G77855	-2.65914	0.0281954
AT1G77870	-2.80308	0.0167583
AT1G77880	2.365	0.0310281
AT1G77950	5.60858	0.00138707
AT1G77960	1.46692	0.0233438
AT1G77990	-2.48532	0.00633754
AT1G78000	-2.83052	0.000714415
AT1G78070	3.07158	0.000119181
AT1G78090	-3.89071	0.00169293
AT1G78120	-3.33391	0.0166837
AT1G78170	-1.81925	0.0125859
AT1G78190	1.2873	0.00104014
AT1G78240	-1.0737	0.0164701
AT1G78260	-1.76953	0.00447616
AT1G78300	-1.45225	0.000138692
AT1G78320	-1.54093	0.0336784
AT1G78370	-2.35955	0.0012881
AT1G78380	1.27927	0.000271119
AT1G78430	-3.75774	0.00139775
AT1G78440	-2.42709	0.0480232
AT1G78450	-6.10327	0.00514975
AT1G78460	-2.68602	5.58963e-05
AT1G78510	1.30092	0.000354167
AT1G78530	-3.2425	0.00456064
AT1G78610	1.63616	0.00023837
AT1G78630	-1.01862	0.00964207
AT1G78670	1.47975	0.00259858
AT1G78770	-2.37665	0.00126324
AT1G78850	1.2189	6.00161e-05
AT1G78860	-2.58084	0.0128404
AT1G78865	-3.82147	0.0053438
AT1G78915	-1.08488	0.0286976
AT1G78930	1.84487	0.0171734
AT1G78970	-2.588	0.00352694
AT1G79110	1.13094	0.00151223
AT1G79260	1.72285	0.00138021
AT1G79270	3.51303	0.00390671
AT1G79280	1.36973	0.000916263
AT1G79390	1.15539	0.00971103
AT1G79490	1.57351	0.00836087
AT1G79520	3.98948	0.000159034
AT1G79610	1.47197	0.00129113
AT1G79630	1.46309	0.00461737
AT1G79700	-2.79686	0.00227543
AT1G79720	-2.30057	0.00399287
AT1G79770	-3.86922	0.00192
AT1G79780	1.62944	0.0138277
AT1G79790	-1.005	0.013172
AT1G79830	1.00208	0.000301955
AT1G79880	1.40019	0.000246219
AT1G79900	4.64998	0.001648
AT1G79915	1.03323	0.0219729
AT1G79970	1.40802	0.00191047
AT1G80090	2.9696	0.0119015
AT1G80110	2.97641	0.00040675
AT1G80130	4.43956	0.000566432
AT1G80150	1.75797	0.0424291
AT1G80160	5.87142	0.00174494
AT1G80245	1.77009	0.0025222
AT1G80280	-4.15596	0.00370492
AT1G80300	1.87951	3.36299e-05
AT1G80340	-1.88763	0.014677
AT1G80370	-2.98295	0.00174494
AT1G80380	-1.56203	0.000199341
AT1G80440	-1.15254	0.000763765
AT1G80460	-1.11309	0.00340573
AT1G80530	1.7522	0.00038461
AT1G80560	-1.14737	0.0389234
AT1G80570	1.66124	0.00242071
AT1G80610	1.54856	0.0201644
AT1G80690	-2.67926	0.0212908
AT1G80760	-2.52376	0.00430721
AT1G80820	2.85953	0.0213556
AT1G80890	1.95256	0.00021751
AT1G80920	-1.75958	0.000211003
AT2G01021	2.85083	0.00890869
AT2G01070	-1.13326	0.014245
AT2G01100	1.30868	0.000591488
AT2G01175	2.73915	0.000696206
AT2G01180	-1.41098	0.00280547
AT2G01270	1.24026	0.00177947
AT2G01300	-3.1072	0.000555838
AT2G01350	1.11926	0.00719843
AT2G01410	2.29976	0.0123288
AT2G01420	-1.5029	0.00043689
AT2G01460	1.37951	0.0128826
AT2G01470	1.27053	8.73282e-05
AT2G01490	1.16794	0.00023322
AT2G01540	1.89524	0.000512898
AT2G01590	-1.86466	0.003032
AT2G01610	-2.12636	0.0249177
AT2G01670	-1.38392	0.00872746
AT2G01690	1.76989	0.0097603
AT2G01818	-2.18714	0.0477529
AT2G01905	-2.59182	0.00540351
AT2G01910	-1.90736	0.0027599
AT2G01918	-1.94373	0.00905467
AT2G01950	-2.69551	0.0125611
AT2G02020	-2.4522	0.0144141
AT2G02060	1.29796	0.00889812
AT2G02070	-1.58072	0.00223607
AT2G02120	5.08414	0.00419185
AT2G02350	2.17593	0.0311533
AT2G02370	1.18138	0.00117093
AT2G02390	1.75198	0.000114141
AT2G02450	-2.03057	0.00309097
AT2G02500	-1.33928	0.00884128
AT2G02590	-1.44895	0.00356422
AT2G02700	2.56393	0.00745926
AT2G02820	-1.87648	0.0103392
AT2G02880	1.37583	0.0299125
AT2G02950	-1.3687	0.0208348
AT2G02955	1.23722	0.0124098
AT2G03350	-2.05802	0.00121667
AT2G03620	1.05737	0.00348053
AT2G03810	1.06053	0.0126509
AT2G03820	1.07683	0.000210228
AT2G03890	1.33333	0.000295374
AT2G04032	-2.92209	0.000272574
AT2G04100	2.2049	0.00443239
AT2G04160	1.09225	0.0226406
AT2G04190	3.78924	0.0227237
AT2G04230	1.01898	0.00375526
AT2G04240	2.65772	5.99219e-05
AT2G04350	2.02458	4.99321e-05
AT2G04560	1.04999	0.030505
AT2G04750	-1.64285	0.0153366
AT2G04780	-3.41249	0.000929257
AT2G04790	-3.50015	0.0444731
AT2G04795	-2.00065	0.00105504
AT2G04805	4.78094	0.0038873
AT2G04940	1.09124	0.00142658
AT2G04955	1.3998	0.00158384
AT2G05070	-3.27856	0.000575786
AT2G05075	1.64263	0.00206837
AT2G05100	-2.93309	0.00302557
AT2G05160	-2.19386	0.0125859
AT2G05185	1.53731	0.00472312
AT2G05440	1.8896	0.00512136
AT2G05510	3.54371	0.0125013
AT2G05520	1.56028	0.000147627
AT2G05530	1.48088	0.0103744
AT2G05630	1.18781	0.000232949
AT2G05655	1.76989	0.0097603
AT2G05710	1.01719	0.0035079
AT2G05765	1.50817	0.000334532
AT2G05790	-2.94563	0.00204571
AT2G05810	-1.50935	0.0269259
AT2G05990	-1.02104	0.000609162
AT2G06002	1.02936	0.0161312
AT2G06520	-2.14796	0.000296923
AT2G06850	-4.43156	7.40508e-05
AT2G06925	-2.518	0.000775284
AT2G07170	-4.59905	0.00103464
AT2G07180	-1.06492	0.016705
AT2G07629	1.53652	0.000324207
AT2G07641	1.14086	0.0100241
AT2G07644	1.20066	0.0332976
AT2G07654	1.94599	0.044278
AT2G07658	2.58068	0.00199328
AT2G07672	2.27096	0.0197734
AT2G07676	1.40057	0.0239952
AT2G07680	-1.24989	0.0351089
AT2G07681	1.1883	0.0182413
AT2G07690	-1.77363	0.0360492
AT2G07695	1.3586	0.0054239
AT2G07696	1.3012	0.00704136
AT2G07706	1.24809	0.00279947
AT2G07715	1.04664	0.0307975
AT2G07727	1.48692	0.00278332
AT2G07741	1.16223	0.00541236
AT2G07768	1.69787	0.0480861
AT2G07773	1.24473	0.0171904
AT2G07795	1.60928	0.028036
AT2G07825	1.39593	0.0313558
AT2G08315	2.335	0.0093761
AT2G08725	1.81473	0.000271558
AT2G08765	1.94381	0.000508289
AT2G08900	1.72931	0.00260723
AT2G08905	3.0701	0.0326384
AT2G08945	-2.82803	0.00186016
AT2G08950	-4.70961	0.000148485
AT2G09205	-2.44308	0.0181332
AT2G09815	3.81664	0.00788689
AT2G09845	2.7256	0.00342831
AT2G10940	-10.1913	0.000437963
AT2G11522	2.16243	0.0199187
AT2G11891	2.49759	0.0138243
AT2G12190	1.72798	0.0186506
AT2G12400	2.70348	0.000110998
AT2G12550	1.33996	0.00461737
AT2G13290	1.2134	0.0143417
AT2G13570	-2.1627	0.0169899
AT2G13610	-2.92714	0.000975763
AT2G13790	-1.74952	0.00433594
AT2G13800	-1.38826	0.00218481
AT2G13820	-3.78381	0.00242375
AT2G13840	1.32633	0.00260723
AT2G13965	1.15482	0.0155589
AT2G14110	1.0902	0.00409247
AT2G14247	-3.90028	0.00295883
AT2G14560	-3.78276	0.00512295
AT2G14620	2.33555	0.0173066
AT2G14825	1.38188	0.00599192
AT2G14878	2.95638	2.90961e-05
AT2G14890	-2.69277	0.000334532
AT2G15042	-1.07748	0.0121385
AT2G15050	-1.31155	0.00338937
AT2G15080	-1.66526	0.0011186
AT2G15090	-3.63621	2.92656e-05
AT2G15390	-1.92791	0.000975763
AT2G15440	1.78074	0.011657
AT2G15480	3.85563	7.95199e-05
AT2G15490	3.31613	0.00330793
AT2G15620	-1.30524	0.000208221
AT2G15690	1.12736	0.000727413
AT2G15880	-1.12262	0.00589441
AT2G15890	-1.42154	0.000436682
AT2G15950	1.76989	0.0097603
AT2G15970	1.25164	0.00345285
AT2G16060	-1.5394	0.000908673
AT2G16280	-1.04426	0.00188718
AT2G16380	-1.09037	0.0417733
AT2G16430	-1.04596	0.00134858
AT2G16440	-2.41882	0.00349645
AT2G16500	-1.17239	0.000826371
AT2G16530	1.29744	0.000714783
AT2G16586	2.19498	0.000280005
AT2G16595	1.9243	0.00569729
AT2G16660	-4.86016	6.94684e-05
AT2G16700	1.60282	0.00387299
AT2G16720	3.19884	0.000542812
AT2G16770	1.82034	0.00824637
AT2G16790	1.3125	0.00422728
AT2G16850	-4.71493	0.00335044
AT2G16890	1.8015	0.00295675
AT2G16990	3.98268	0.000100659
AT2G17230	-3.75109	4.65266e-05
AT2G17480	-1.40594	0.0049783
AT2G17550	-1.3165	0.000683167
AT2G17570	1.32076	0.00139925
AT2G17620	-2.30943	0.00372907
AT2G17670	1.03379	0.00786459
AT2G17680	4.28391	0.0092497
AT2G17730	1.19658	0.00884128
AT2G17740	-3.93464	0.00133974
AT2G17780	-2.3639	0.010074
AT2G17840	1.41107	0.00892691
AT2G17880	-3.40749	5.40728e-05
AT2G17990	1.13568	0.00128086
AT2G18050	5.64278	2.942e-05
AT2G18060	-2.9312	0.0135515
AT2G18100	2.71925	0.00140054
AT2G18170	1.42124	0.000439466
AT2G18180	-3.17496	0.00762755
AT2G18220	1.08075	0.011625
AT2G18230	2.32211	0.00100786
AT2G18240	1.19824	0.00248246
AT2G18260	-1.4841	0.041048
AT2G18290	-1.30679	0.0422757
AT2G18300	-5.51729	0.000331479
AT2G18328	-3.3285	8.98196e-05
AT2G18370	2.55652	0.00760112
AT2G18410	1.18126	0.045194
AT2G18540	3.93497	0.00070095
AT2G18550	4.01816	0.00286304
AT2G18600	1.9154	0.00419185
AT2G18650	-4.15696	0.00273523
AT2G18690	-1.33814	0.0173403
AT2G18700	-1.78984	7.34355e-05
AT2G18730	-2.40327	0.00216179
AT2G18735	1.20533	0.000449583
AT2G18890	-1.54389	0.0163107
AT2G18910	-2.24634	0.000610659
AT2G18950	1.1087	0.0024237
AT2G19080	1.00191	0.000992719
AT2G19090	-3.29853	0.000610659
AT2G19110	-1.81862	0.00349334
AT2G19170	-4.23398	0.0097603
AT2G19310	1.7723	0.000199341
AT2G19320	3.31945	0.00385774
AT2G19350	1.2094	0.000846164
AT2G19460	-1.12018	0.00524339
AT2G19540	1.12335	0.000805364
AT2G19580	1.06113	0.00292499
AT2G19590	-3.57914	0.000548238
AT2G19620	-1.38634	0.0144516
AT2G19690	-2.94085	0.0451355
AT2G19780	-2.46972	0.000464654
AT2G19800	-6.46023	0.00231041
AT2G19810	2.40826	3.39098e-05
AT2G19860	2.18437	0.000491756
AT2G19880	-1.48794	0.00944364
AT2G19900	9.38375	0.000502623
AT2G19920	-3.34678	0.00419185
AT2G19930	1.46315	0.00615391
AT2G19970	-5.72835	0.000263344
AT2G19990	-3.97077	0.000439885
AT2G20020	1.13047	0.00323847
AT2G20260	-1.54108	0.0015365
AT2G20340	-1.04819	0.0114034
AT2G20390	1.14583	0.00517582
AT2G20400	1.69478	0.00190196
AT2G20490	1.19456	0.00215197
AT2G20515	-3.62555	0.0126814
AT2G20560	4.42695	0.0170336
AT2G20590	-4.05821	0.00213406
AT2G20635	-2.23233	0.0118055
AT2G20670	-3.47911	0.000290609
AT2G20700	-2.92287	0.0143361
AT2G20750	-1.83304	0.0213749
AT2G20770	2.77744	0.00018973
AT2G20880	-3.67913	0.00866448
AT2G20930	-1.00623	0.0151021
AT2G20950	1.01039	0.00620172
AT2G20980	-2.29164	0.0283933
AT2G21050	-2.01154	0.0080879
AT2G21060	-1.19989	0.00051813
AT2G21080	-1.50797	0.00606221
AT2G21130	1.2956	0.000312046
AT2G21140	-5.76873	0.000229708
AT2G21170	-1.01023	0.00652109
AT2G21180	3.41823	7.95199e-05
AT2G21187	3.42985	0.0210796
AT2G21210	-1.01791	0.00850155
AT2G21220	-3.4482	0.0130323
AT2G21270	1.04632	0.00137654
AT2G21280	-1.24857	0.000999942
AT2G21320	2.21681	0.0347762
AT2G21385	-1.00741	0.0118496
AT2G21420	1.78291	0.0152905
AT2G21490	2.71611	0.00980692
AT2G21530	-1.37977	0.0136353
AT2G21540	-2.96959	0.00252872
AT2G21580	1.35941	8.73282e-05
AT2G21590	4.07943	0.00147156
AT2G21620	1.65946	0.000114141
AT2G21650	-5.5456	0.00200964
AT2G21780	4.74472	0.000584495
AT2G21820	8.84338	8.36161e-05
AT2G21830	1.47014	0.00459958
AT2G21840	-2.9536	0.00119539
AT2G21910	-2.9536	0.00119539
AT2G21940	1.32262	0.00120669
AT2G21950	1.11462	0.0250709
AT2G21970	1.37649	0.000572372
AT2G22010	1.36096	0.00337475
AT2G22080	1.91397	0.000146439
AT2G22122	-4.8275	0.00296191
AT2G22125	-1.60608	7.84082e-05
AT2G22170	-1.19678	0.0217718
AT2G22190	1.07729	0.00406201
AT2G22230	-1.08609	0.0050076
AT2G22330	-2.66436	0.00302393
AT2G22420	2.25254	0.00136394
AT2G22470	3.27818	0.0246396
AT2G22490	1.13893	0.0048993
AT2G22570	1.4366	0.00586754
AT2G22670	-1.02922	0.0113773
AT2G22780	1.08626	0.000275491
AT2G22810	-2.97982	0.0425291
AT2G22821	1.76278	0.000945446
AT2G22830	-1.87149	0.00385541
AT2G22900	1.76366	0.00140054
AT2G22980	-1.90548	0.00167668
AT2G22990	-1.82987	0.00356422
AT2G23090	1.30349	0.000310488
AT2G23100	-1.17422	0.0348841
AT2G23110	5.29215	0.0327592
AT2G23130	-3.07829	8.36161e-05
AT2G23170	-1.9503	0.0207213
AT2G23290	-1.57896	0.00535633
AT2G23300	-2.98038	0.034375
AT2G23340	1.6011	0.00100494
AT2G23380	-1.15363	0.0227861
AT2G23530	-2.30943	0.00372907
AT2G23560	-2.77181	0.00185819
AT2G23600	-3.19757	2.92656e-05
AT2G23640	2.64574	0.00871018
AT2G23680	-1.28446	0.00813239
AT2G23690	-4.73988	0.00472131
AT2G23700	-2.03546	0.0234998
AT2G23770	-1.03554	0.0145818
AT2G23910	3.39896	0.00476827
AT2G23945	1.51629	0.0209595
AT2G23980	1.02414	0.000836498
AT2G23985	1.57659	0.00501383
AT2G24060	-1.04885	0.0121439
AT2G24090	-1.56934	0.00060845
AT2G24120	1.02267	0.00631918
AT2G24180	1.57828	0.000140964
AT2G24190	2.29074	0.00388992
AT2G24270	1.21844	0.000357413
AT2G24280	1.27272	0.0013231
AT2G24395	-2.62598	0.00174917
AT2G24420	1.15934	0.00029614
AT2G24490	-1.98612	0.00147739
AT2G24500	1.09399	0.000510168
AT2G24580	-1.11257	0.00619261
AT2G24600	-3.25946	0.00114864
AT2G24610	-3.72904	0.00184024
AT2G24645	-2.00783	0.011014
AT2G24692	-3.89438	0.00124486
AT2G24762	-1.04654	0.0035532
AT2G24940	1.59115	5.15269e-05
AT2G24990	1.50048	0.00123412
AT2G25060	-6.6449	0.00442523
AT2G25080	-1.82687	0.000284936
AT2G25090	4.73075	0.000139592
AT2G25130	-2.59182	0.00540351
AT2G25140	1.48084	0.00417242
AT2G25150	-2.12475	0.0146895
AT2G25200	-2.3122	7.95199e-05
AT2G25220	-2.75696	0.00267649
AT2G25240	1.76989	0.0097603
AT2G25297	-2.42171	0.0204617
AT2G25450	2.22369	0.00727614
AT2G25480	-1.12084	0.0333135
AT2G25510	-2.89522	0.000727413
AT2G25570	1.25162	0.0270355
AT2G25620	2.42635	0.000450788
AT2G25625	4.00946	8.36583e-05
AT2G25650	1.10097	0.0400356
AT2G25690	1.5279	0.0151636
AT2G25735	-3.99566	5.23992e-05
AT2G25740	1.15821	0.0232634
AT2G25810	-3.17553	0.0182693
AT2G25820	3.05988	0.00437795
AT2G25880	-3.97893	0.00336427
AT2G25940	2.55253	0.0414868
AT2G25950	1.25458	0.0063351
AT2G25964	2.14223	4.64768e-05
AT2G26010	-4.79309	0.004055
AT2G26020	-4.97206	0.00919797
AT2G26040	-3.22962	0.00154121
AT2G26060	1.12243	0.000397626
AT2G26080	-1.21057	0.000667132
AT2G26120	-2.18927	0.0118026
AT2G26180	-2.9358	0.00254539
AT2G26190	-1.04008	0.00123415
AT2G26310	1.34883	0.0296525
[truncated: 4,206 more rows]

## Sheet: DEGs OX-1
GeneID	Log2FC	FDR
AT1G01110	-1.30625	0.0122805
AT1G01120	-1.91025	0.0280073			GeneID	Log2FC	FDR
AT1G01180	-1.36751	0.0301539
AT1G01210	1.02418	0.00588984
AT1G01250	3.87989	0.00195954
AT1G01300	-1.50334	0.00276307
AT1G01340	-2.33429	0.0106235
AT1G01370	-2.53455	0.0236508
AT1G01380	1.37015	0.0187958
AT1G01390	-1.8247	0.0311248
AT1G01453	2.46608	0.0283456
AT1G01470	2.05512	0.00968993
AT1G01500	1.51563	0.00685127
AT1G01520	4.088	0.0105526
AT1G01600	-4.392	0.0053193
AT1G01620	-3.53212	0.00753546
AT1G01640	2.03641	0.0213149
AT1G01650	1.58262	0.0123105
AT1G01720	2.30026	0.00365648
AT1G01725	1.27389	0.0137035
AT1G01790	-2.35069	0.00268739
AT1G01810	2.17056	0.0354154
AT1G01840	3.32493	0.00649441
AT1G01920	1.22954	0.0348663
AT1G02050	1.51378	0.00277001
AT1G02305	1.04649	0.0469059
AT1G02310	6.17732	0.0405218
AT1G02335	1.02166	0.0435393
AT1G02360	-5.4836	0.00711943
AT1G02380	-2.6429	0.00383091
AT1G02390	3.37444	0.0105798
AT1G02470	2.71285	0.0164282
AT1G02610	-1.42073	0.013456
AT1G02620	-3.97417	0.00472873
AT1G02640	-5.1084	0.00227527
AT1G02650	-4.59841	0.00207694
AT1G02690	-1.2604	0.0173643
AT1G02730	-4.48169	0.00458634
AT1G02770	2.48833	0.00250557
AT1G02800	-3.43109	0.0080852
AT1G02813	3.0697	0.00486187
AT1G02850	2.16527	0.00733195
AT1G02870	1.08619	0.00762494
AT1G02970	-3.06988	0.010557
AT1G03070	3.28605	0.00460535
AT1G03310	1.49376	0.00577613
AT1G03457	-2.32904	0.00716386
AT1G03530	1.01963	0.0223986
AT1G03550	1.34194	0.0344688
AT1G03760	1.46048	0.048513
AT1G03780	-2.87632	0.0177525
AT1G03840	-2.52025	0.0174344
AT1G03870	-6.34676	0.00384161
AT1G04040	-2.22337	0.00142995
AT1G04110	-4.82762	0.00144133
AT1G04160	-1.59363	0.0424646
AT1G04180	-4.89191	0.00988839
AT1G04220	1.44102	0.0378707
AT1G04250	-2.00925	0.00142995
AT1G04357	-1.41033	0.0228404
AT1G04360	-3.17479	0.0376251
AT1G04425	-3.4414	0.00664168
AT1G04430	-1.62948	0.00264012
AT1G04520	-3.97464	0.00852352
AT1G04530	-1.07448	0.0446417
AT1G04560	6.07882	0.0140576
AT1G04570	5.83261	0.00433076
AT1G04600	-1.7386	0.0415586
AT1G04660	-3.68506	0.00617467
AT1G04680	-3.01666	0.0121452
AT1G04730	-1.54563	0.0363373
AT1G04800	-3.08446	0.00555987
AT1G04820	-1.73571	0.00250557
AT1G04830	1.72469	0.00416691
AT1G04877	-1.66331	0.0286381
AT1G05010	-1.6488	0.0018221
AT1G05020	-2.53492	0.0250613
AT1G05060	1.46849	0.026336
AT1G05100	3.54457	0.0324613
AT1G05133	3.53077	0.0347451
AT1G05153	-2.53598	0.0479418
AT1G05170	1.69957	0.0273819
AT1G05190	-1.15551	0.00355422
AT1G05210	-3.33286	0.00277001
AT1G05260	1.9423	0.0336949
AT1G05330	4.05954	0.0189709
AT1G05340	5.61563	0.00363036
AT1G05440	-2.76929	0.0122923
AT1G05450	2.51707	0.0106089
AT1G05470	-1.17235	0.0499619
AT1G05510	4.79238	0.0244842
AT1G05630	-1.42108	0.024621
AT1G05805	-1.46522	0.00970176
AT1G05810	-2.57062	0.00162334
AT1G05870	1.84502	0.00376391
AT1G05890	1.02771	0.0058496
AT1G06040	1.00509	0.00928347
AT1G06080	-5.36937	0.00315832
AT1G06090	3.1702	0.0124986
AT1G06110	1.21123	0.00792441
AT1G06160	-4.03916	0.00723676
AT1G06180	3.34376	0.000964788
AT1G06217	2.56659	0.00434765
AT1G06270	1.44395	0.0462286
AT1G06360	-3.25788	0.012722
AT1G06430	1.26479	0.00460535
AT1G06447	-2.67952	0.00440054
AT1G06473	2.91064	0.00445141
AT1G06520	2.10207	0.0389773
AT1G06570	1.99523	0.00194695
AT1G06680	-1.69687	0.0261664
AT1G06710	1.75517	0.024797
AT1G06720	1.57914	0.0389914
AT1G06830	-3.69852	0.00730862
AT1G06850	-1.6935	0.00995778
AT1G06977	1.91792	0.00834062
AT1G07000	-1.55299	0.0104685
AT1G07010	1.05426	0.0221466
AT1G07050	-2.21214	0.00132618
AT1G07120	3.32126	0.0159463
AT1G07135	-2.9119	0.00793688
AT1G07150	-2.05462	0.0034915
AT1G07320	-1.65671	0.00461974
AT1G07350	1.44818	0.00755643
AT1G07370	-5.14846	0.00272499
AT1G07380	1.26068	0.020784
AT1G07390	2.74214	0.0267158
AT1G07430	5.81474	0.000494472
AT1G07440	1.06992	0.0231102
AT1G07510	1.42188	0.00672474
AT1G07530	1.39993	0.0080852
AT1G07540	3.6211	0.0377992
AT1G07610	-1.03856	0.0194562
AT1G07615	1.20955	0.0249951
AT1G07720	1.56453	0.00260405
AT1G07750	1.58868	0.00113611
AT1G07830	1.39986	0.00383527
AT1G07870	1.30445	0.00365648
AT1G07900	4.14733	0.0218424
AT1G07985	4.76331	0.00373247
AT1G08040	1.04306	0.0365441
AT1G08050	-1.24152	0.0305344
AT1G08080	3.25233	0.00679254
AT1G08110	1.21004	0.0061688
AT1G08230	2.6165	0.00120659
AT1G08280	-1.67529	0.0137967
AT1G08340	1.72664	0.02463
AT1G08380	-1.38296	0.0210779
AT1G08440	3.18508	0.0127346
AT1G08560	-3.11824	0.0159538
AT1G08570	1.23729	0.00684963
AT1G08630	2.54993	0.0104569
AT1G08640	1.16406	0.0312596
AT1G08643	-1.82059	0.0365363
AT1G08650	1.81776	0.00490836
AT1G08757	-3.91077	0.00425418
AT1G08810	-1.95173	0.0129903
AT1G08890	1.4767	0.00387407
AT1G08920	2.35263	0.00813221
AT1G08930	-2.23784	0.0048036
AT1G09140	1.40085	0.0212416
AT1G09180	2.07689	0.00748323
AT1G09200	-3.18174	0.00259009
AT1G09217	-1.15479	0.0177669
AT1G09220	1.93151	0.00748323
AT1G09250	-1.92009	0.0325709
AT1G09290	1.29572	0.00433031
AT1G09340	-2.1588	0.00258977
AT1G09390	-2.36265	0.00277132
AT1G09440	1.67135	0.00623542
AT1G09450	-3.2005	0.0168771
AT1G09460	-4.37767	0.00105768
AT1G09470	-2.37557	0.0218753
AT1G09500	4.12428	0.0293609
AT1G09510	2.69057	0.0372261
AT1G09530	2.60447	0.00227527
AT1G09575	-1.22771	0.00829051
AT1G09750	-5.36849	0.000854924
AT1G09870	1.00568	0.0283173
AT1G09913	-1.74686	0.00910063
AT1G09930	-2.77486	0.00778978
AT1G09937	1.20302	0.0123621
AT1G10020	-3.47025	0.00250557
AT1G10030	-1.63895	0.00625159
AT1G10040	2.03178	0.00883141
AT1G10060	-1.80524	0.0321859
AT1G10070	2.03337	0.0482994
AT1G10120	-1.00477	0.0479418
AT1G10140	1.25474	0.041721
AT1G10210	1.70206	0.00460535
AT1G10360	-1.70082	0.0241042
AT1G10470	-2.18063	0.00419771
AT1G10490	1.62184	0.0287769
AT1G10550	-5.73296	0.00113611
AT1G10657	-3.32275	0.0251238
AT1G10660	1.09496	0.0255522
AT1G10680	-2.40162	0.0454084
AT1G10800	2.61612	0.0266742
AT1G10865	1.25542	0.0259125
AT1G10960	-1.30357	0.012486
AT1G10980	-2.51827	0.0408271
AT1G10990	-2.43881	0.0192401
AT1G11125	-1.01169	0.04658
AT1G11170	2.55789	0.0112528
AT1G11175	1.65286	0.00195083
AT1G11185	-2.84181	0.0225085
AT1G11190	2.10915	0.0133261
AT1G11210	2.09446	0.00631369
AT1G11230	2.70781	0.0161135
AT1G11260	-3.49144	0.0332915
AT1G11270	1.3703	0.0287222
AT1G11300	2.18181	0.00279276
AT1G11303	-1.90648	0.0158738
AT1G11340	-1.54954	0.0284983
AT1G11350	-1.25842	0.0271644
AT1G11362	-3.93674	0.00316309
AT1G11380	-1.16106	0.00524156
AT1G11410	1.47943	0.0111792
AT1G11475	1.09381	0.00264012
AT1G11545	-5.84002	0.00414164
AT1G11580	-1.33051	0.0283173
AT1G11700	1.55108	0.00822894
AT1G11740	-4.4741	0.00460568
AT1G11785	2.96455	0.00418933
AT1G11820	-1.94537	0.0100406
AT1G11850	-3.99204	0.0039478
AT1G11860	-1.86991	0.00428707
AT1G12000	-1.14954	0.00559761
AT1G12020	-1.8377	0.0177422
AT1G12050	1.06272	0.00807883
AT1G12080	-4.39632	0.00460535
AT1G12090	-2.04566	0.000964788
AT1G12100	-3.07733	0.009792
AT1G12110	-3.72961	0.00210768
AT1G12460	-2.47803	0.0397305
AT1G12500	-2.0886	0.00307095
AT1G12570	-3.45876	0.00181961
AT1G12900	-1.6403	0.00772947
AT1G13090	1.28928	0.00231762
AT1G13110	-1.1211	0.00923408
AT1G13210	-1.28326	0.00761844
AT1G13250	-1.83693	0.00648798
AT1G13360	1.2304	0.00253377
AT1G13410	2.39963	0.0229411
AT1G13520	4.96214	0.0187958
AT1G13600	1.36183	0.00924742
AT1G13609	-1.91153	0.0180232
AT1G13670	-2.05905	0.0375924
AT1G13825	1.91792	0.00834062
AT1G13920	2.80302	0.00208569
AT1G13930	1.97451	0.00529433
AT1G13990	1.35683	0.0233548
AT1G14150	-1.9365	0.00245371
AT1G14170	-1.48738	0.00288799
AT1G14250	-4.18151	0.0061688
AT1G14290	-2.88484	0.00264012
AT1G14300	1.36944	0.0102728
AT1G14345	-1.47908	0.0192945
AT1G14430	-3.02855	0.00406021
AT1G14440	-1.15256	0.00793688
AT1G14455	3.22241	0.00802532
AT1G14460	-1.43836	0.0192704
AT1G14630	-1.22631	0.0372261
AT1G14880	-3.92801	0.0299719
AT1G14900	-1.48157	0.00807883
AT1G14920	-1.35178	0.010139
AT1G14940	2.48845	0.0104569
AT1G15100	1.49558	0.00547467
AT1G15190	3.59075	0.0314918
AT1G15200	1.25567	0.00438526
AT1G15230	1.54088	0.0026238
AT1G15310	3.122	0.0182258
AT1G15330	2.82363	0.0130326
AT1G15380	1.37121	0.0354674
AT1G15440	1.4155	0.0144935
AT1G15520	1.25059	0.0127036
AT1G15570	-3.0471	0.014732
AT1G15660	-1.26205	0.018527
AT1G15820	-2.2304	0.01847
AT1G15830	-2.87498	0.0127744
AT1G15840	4.32248	0.000964788
AT1G15980	-1.27155	0.00429188
AT1G16040	1.20671	0.00787879
AT1G16070	-2.6447	0.0359433
AT1G16080	-1.20355	0.0103443
AT1G16170	-1.18152	0.0304896
AT1G16330	-1.98392	0.0162409
AT1G16390	-4.6317	0.00507008
AT1G16510	1.01602	0.0499486
AT1G16515	4.12535	0.00359672
AT1G16640	-3.63864	0.0283009
AT1G16730	1.04167	0.0177194
AT1G16740	1.25669	0.0437571
AT1G16770	1.27882	0.0309766
AT1G16850	5.061	0.000964788
AT1G16880	-1.54488	0.00147828
AT1G16950	3.01383	0.00181961
AT1G17020	4.57686	0.00960942
AT1G17140	-2.52453	0.0394049
AT1G17345	-2.80462	0.0139942
AT1G17420	-1.82489	0.0205056
AT1G17460	1.44382	0.0137688
AT1G17530	1.40454	0.00364909
AT1G17550	1.51071	0.00439427
AT1G17560	-4.0024	0.0105825
AT1G17620	-1.09803	0.0345653
AT1G17650	-1.53449	0.0105302
AT1G17745	2.41917	0.00289149
AT1G17870	4.5925	0.00751214
AT1G17940	1.9237	0.0034915
AT1G18000	-1.14295	0.0259202
AT1G18010	-1.13267	0.0310469
AT1G18090	-1.48513	0.0215632
AT1G18100	4.85739	0.0026238
AT1G18140	-3.30925	0.0364478
AT1G18200	-1.19709	0.0162614
AT1G18250	-5.76171	0.00955887
AT1G18370	-4.90756	0.00449417
AT1G18400	-2.6487	0.00443747
AT1G18620	-2.75057	0.0331627
AT1G18710	1.89414	0.0184241
AT1G18720	1.12793	0.0154904
AT1G18745	1.53092	0.00434366
AT1G18750	1.19774	0.00677317
AT1G18840	1.57911	0.0215167
AT1G19020	-1.65426	0.00489583
AT1G19050	-2.13769	0.00984867
AT1G19150	-2.24682	0.00372053
AT1G19320	-4.65933	0.00137677
AT1G19373	1.6051	0.00730862
AT1G19380	-3.67518	0.0018591
AT1G19450	-1.87869	0.00486187
AT1G19490	2.63003	0.0298532
AT1G19530	1.55394	0.0315373
AT1G19570	1.61491	0.000964788
AT1G19670	-1.79036	0.00818004
AT1G19950	-2.67549	0.01104
AT1G20010	-2.47973	0.0085997
AT1G20020	-1.91973	0.000692563
AT1G20060	-2.63329	0.0390993
AT1G20090	-1.17473	0.0118689
AT1G20140	1.5016	0.0362508
AT1G20160	3.10815	0.00852877
AT1G20180	2.16119	0.00803231
AT1G20330	-1.50909	0.00221056
AT1G20340	-1.50682	0.0126936
AT1G20380	1.85631	0.0159326
AT1G20440	1.29596	0.0288502
AT1G20450	2.20888	0.00286706
AT1G20490	1.10292	0.0134728
AT1G20780	-1.54313	0.0041872
AT1G20816	1.13643	0.0170124
AT1G20930	-2.93537	0.00610712
AT1G20970	-1.02382	0.0043792
AT1G21000	1.93951	0.00383091
AT1G21050	-2.89321	0.0203294
AT1G21070	-2.0146	0.0439383
AT1G21120	-1.69541	0.0237259
AT1G21210	1.33563	0.0493986
AT1G21270	-1.89895	0.0129813
AT1G21310	1.05712	0.0487666
AT1G21400	2.63924	0.00539714
AT1G21410	1.99255	0.00264012
AT1G21450	1.14962	0.0018591
AT1G21460	1.82734	0.0149931
AT1G21500	-2.24631	0.0151492
AT1G21529	3.60924	0.00444186
AT1G21540	-2.61269	0.017105
AT1G21680	1.78407	0.00264012
AT1G21750	1.27872	0.0158347
AT1G21790	1.8213	0.00331289
AT1G21830	-1.23378	0.00277988
AT1G21880	-1.17585	0.020275
AT1G21910	-3.68196	0.000964788
AT1G22160	2.82554	0.00492796
AT1G22180	1.0591	0.0476198
AT1G22330	-7.76811	0.00285903
AT1G22370	1.958	0.00408712
AT1G22400	-1.12185	0.0221107
AT1G22480	5.41131	0.0258467
AT1G22530	-2.39846	0.00105768
AT1G22590	-1.78204	0.0154283
AT1G22640	1.2124	0.0375224
AT1G22650	-2.42578	0.0138582
AT1G22690	-5.83896	0.00155457
AT1G22740	-1.30851	0.0242754
AT1G22885	-1.16714	0.0234648
AT1G22985	1.06406	0.0204241
AT1G22990	7.47973	0.00118447
AT1G23010	1.2187	0.0232513
AT1G23030	-3.07668	0.00181961
AT1G23040	1.36268	0.0170323
AT1G23070	1.91273	0.0149599
AT1G23090	-4.59263	0.000964788
AT1G23120	2.64693	0.00126554
AT1G23205	-3.64035	0.0338103
AT1G23330	2.16904	0.00620586
AT1G23340	-3.51124	0.0234503
AT1G23390	-1.6748	0.0317866
AT1G23480	-5.36114	0.00206459
AT1G23740	1.04134	0.0102708
AT1G23790	-3.63945	0.0187355
AT1G23800	1.31685	0.0150497
AT1G23860	1.16776	0.00426165
AT1G24020	-2.3461	0.00418933
AT1G24147	-3.05099	0.00850922
AT1G24150	-1.05541	0.0228139
AT1G24170	-2.84363	0.00244154
AT1G24470	2.39639	0.0298252
AT1G24530	-2.50157	0.00280189
AT1G24570	2.36552	0.0314351
AT1G24580	3.95172	0.0203114
AT1G24600	4.13328	0.0197316
AT1G25230	-1.6944	0.00672585
AT1G25260	1.03949	0.00767554
AT1G25277	2.09976	0.00316282
AT1G25400	-1.47934	0.0332513
AT1G25450	-4.38612	0.00330663
AT1G25530	2.97289	0.00286784
AT1G26200	-3.82423	0.0131057
AT1G26208	1.7116	0.0151175
AT1G26310	-1.70248	0.0487296
AT1G26520	1.33623	0.0476646
AT1G26540	-3.81579	0.0323424
AT1G26558	1.07417	0.0389914
AT1G26570	-1.57084	0.0134802
AT1G26660	1.28327	0.0256599
AT1G26760	-2.77486	0.00778978
AT1G26770	-1.56471	0.0466592
AT1G26780	-2.96147	0.00254941
AT1G26920	1.14026	0.0153848
AT1G26945	-1.98032	0.0381128
AT1G26960	-1.39357	0.0116985
AT1G27020	-4.89295	0.0168875
AT1G27110	1.70302	0.0161684
AT1G27140	1.91792	0.00834062
AT1G27150	1.88006	0.00619648
AT1G27200	2.47441	0.00288366
AT1G27210	-1.51578	0.0387758
AT1G27460	-2.5381	0.0183969
AT1G27461	4.99187	0.00473123
AT1G27480	-1.20856	0.0312069
AT1G27565	1.01925	0.0080852
AT1G27760	1.04747	0.0116282
AT1G27940	-2.15027	0.0460219
AT1G27960	-1.02569	0.0200181
AT1G27990	2.96353	0.01115
AT1G28010	-2.85899	0.0083513
AT1G28130	-1.57607	0.0185732
AT1G28190	1.06086	0.0278436
AT1G28210	1.1146	0.0382795
AT1G28230	1.8223	0.00562268
AT1G28260	1.71554	0.00172424
AT1G28290	-2.86199	0.00742513
AT1G28370	2.57237	0.0136109
AT1G28470	1.90928	0.0156629
AT1G28610	1.01766	0.0234149
AT1G28650	4.7266	0.009381
AT1G28960	1.02936	0.0128106
AT1G29070	-1.68503	0.00565049
AT1G29100	1.66948	0.0070978
AT1G29160	-1.05108	0.0202834
AT1G29240	1.79066	0.00142995
AT1G29418	1.03033	0.0221662
AT1G29430	-2.42806	0.00959854
AT1G29440	-1.96917	0.0266939
AT1G29450	-1.76695	0.0288467
AT1G29465	1.0235	0.00479982
AT1G29490	-1.7813	0.0261572
AT1G29510	-1.31362	0.0288504
AT1G29640	5.0077	0.00696651
AT1G29660	-2.21124	0.00181961
AT1G29670	-2.04309	0.00667575
AT1G29910	-1.56388	0.00280869
AT1G29920	-2.38996	0.00230633
AT1G29980	-2.38366	0.00138486
AT1G30050	-1.98682	0.0125488
AT1G30070	1.29277	0.0147595
AT1G30190	5.76712	0.00809753
AT1G30220	5.86684	0.00624575
AT1G30280	-3.06455	0.00264012
AT1G30380	-1.90902	0.00339387
AT1G30455	1.91792	0.00834062
AT1G30500	2.66142	0.00677317
AT1G30515	-2.77844	0.0090076
AT1G30520	-2.56322	0.00642674
AT1G30640	1.00754	0.0138109
AT1G30690	-1.19809	0.00600659
AT1G30720	-4.64109	0.00990878
AT1G30730	-3.86683	0.00732302
AT1G30820	1.17695	0.0214294
AT1G30880	1.39323	0.00259009
AT1G31010	1.30643	0.0266925
AT1G31170	1.11481	0.00626148
AT1G31330	-2.00543	0.0107271
AT1G31335	-1.35571	0.00971338
AT1G31350	-1.2327	0.00712789
AT1G31420	-1.11372	0.0127183
AT1G31430	1.05105	0.0337752
AT1G31580	-4.01472	0.00705043
AT1G31690	-6.1487	0.00119364
AT1G31710	-2.30987	0.0249015
AT1G31750	5.85148	0.00800223
AT1G31800	-1.41702	0.00339387
AT1G31820	1.8591	0.0148019
AT1G31830	1.10419	0.0180232
AT1G32060	-1.51111	0.00448155
AT1G32080	-2.00298	0.00182634
AT1G32090	-1.31163	0.00593103
AT1G32100	1.5939	0.0140382
AT1G32170	-2.02015	0.00405272
AT1G32200	-1.53569	0.00489634
AT1G32220	-1.01566	0.00297603
AT1G32350	6.49107	0.00731703
AT1G32450	3.03545	0.00179895
AT1G32470	-2.59108	0.00264012
AT1G32520	1.2335	0.00409525
AT1G32560	4.37161	0.00270772
AT1G32583	2.37096	0.0107887
AT1G32770	4.22046	0.0020724
AT1G32870	1.58862	0.00264012
AT1G32900	2.39988	0.00636338
AT1G32910	-2.88947	0.0454531
AT1G32920	-1.0788	0.0487666
AT1G32990	-1.49649	0.00709131
AT1G33102	3.57477	0.00259009
AT1G33110	1.093	0.0392651
AT1G33170	-2.52934	0.00227527
AT1G33240	-2.26523	0.00663626
AT1G33265	1.59967	0.00291486
AT1G33270	1.18096	0.0245586
AT1G33415	1.46647	0.0494756
AT1G33480	2.14395	0.00739491
AT1G33490	1.28369	0.0147041
AT1G33610	-3.1652	0.013143
AT1G33760	-3.58701	0.00138486
AT1G33770	-2.52434	0.00460535
AT1G33790	-3.67971	0.0179277
AT1G33800	2.06408	0.0299325
AT1G33811	-3.54527	0.00276123
AT1G34160	1.52919	0.00581113
AT1G34245	-2.03087	0.035563
AT1G34580	-1.83023	0.0295209
AT1G35140	-5.53875	0.00666443
AT1G35180	-2.1992	0.0365254
AT1G35190	1.51924	0.00181961
AT1G35320	1.21497	0.0204241
AT1G35350	-1.79878	0.00819369
AT1G35516	1.35849	0.00582878
AT1G35580	-1.32709	0.00287085
AT1G35680	-1.36303	0.00474992
AT1G35720	2.85561	0.00673639
AT1G35780	-1.52749	0.0221555
AT1G36050	-1.17054	0.00259009
AT1G36340	1.66948	0.0070978
AT1G36940	-2.65731	0.0212968
AT1G42970	-1.10543	0.0455379
AT1G43560	-1.23048	0.031103
AT1G43605	-1.86536	0.0405218
AT1G43670	-1.88336	0.00184252
AT1G43700	1.22891	0.00450836
AT1G43800	-1.9862	0.00555987
AT1G44000	-1.27621	0.0167155
AT1G44110	-3.60415	0.014824
AT1G44760	1.41977	0.00157341
AT1G44810	1.54735	0.00412943
AT1G44830	-4.77087	0.00130826
AT1G44900	-2.84137	0.00713839
AT1G44920	-1.10367	0.0205733
AT1G44970	-3.59067	0.0321535
AT1G45130	-1.49754	0.0474256
AT1G45145	1.22394	0.0107209
AT1G45180	-2.57606	0.0095347
AT1G45191	-1.28538	0.0433455
AT1G45230	1.43178	0.00358729
AT1G45231	1.10174	0.0184583
AT1G45249	3.87872	0.000692563
AT1G45976	1.13279	0.0188659
AT1G46480	-2.33575	0.0333804
AT1G46554	2.19868	0.00331289
AT1G46768	2.20225	0.00684963
AT1G47210	-2.53398	0.00721
AT1G47290	-1.68302	0.000964788
AT1G47510	3.13443	0.0328958
AT1G47570	1.61053	0.006984
AT1G47710	1.1043	0.0102301
AT1G47740	-1.33143	0.00610712
AT1G47820	1.24705	0.00264012
AT1G47960	2.84365	0.00279276
AT1G47980	4.40043	0.0221022
AT1G48000	4.49193	0.00264012
AT1G48210	-1.1341	0.00619648
AT1G48300	1.01794	0.0336906
AT1G48370	2.35022	0.0217998
AT1G48460	1.14687	0.014189
AT1G48480	-3.94098	0.00314784
AT1G48500	2.86919	0.0141324
AT1G48540	1.26914	0.00592934
AT1G48610	-1.50987	0.014849
AT1G48630	-1.22459	0.00732261
AT1G48745	1.15865	0.0131057
AT1G48920	1.18466	0.0161208
AT1G49210	-1.95442	0.0338103
AT1G49230	-1.282	0.00181961
AT1G49430	-1.71497	0.00539718
AT1G49450	2.94135	0.0121627
AT1G49540	1.46806	0.0160148
AT1G49560	1.159	0.0194785
AT1G49660	1.86679	0.000964788
AT1G49700	1.33689	0.0128316
AT1G49720	1.13937	0.00443747
AT1G49730	-3.57266	0.00979752
AT1G49750	-3.25816	0.0125488
AT1G49800	1.91273	0.0149599
AT1G49832	1.25095	0.0141525
AT1G49870	-3.51685	0.00126554
AT1G49938	1.66948	0.0070978
AT1G50010	-2.45567	0.00216342
AT1G50040	-4.7176	0.00108164
AT1G50110	-3.25155	0.009381
AT1G50240	-4.12731	0.0175604
AT1G50260	1.78236	0.0183005
AT1G50320	-1.08197	0.00792441
AT1G50420	1.48637	0.00333118
AT1G50430	-1.03567	0.00267636
AT1G50460	-1.86407	0.00224804
AT1G50490	-2.10897	0.0194562
AT1G50630	1.5416	0.0150092
AT1G50950	1.31542	0.00526901
AT1G51055	-1.91153	0.0180232
AT1G51060	-1.02659	0.0142775
AT1G51070	-1.18558	0.0283956
AT1G51090	2.90202	0.00376391
AT1G51140	4.4889	0.00140775
AT1G51200	1.22118	0.00601929
AT1G51520	2.33548	0.00356674
AT1G51570	-1.10541	0.00415561
AT1G51700	1.45644	0.00647758
AT1G51760	-1.30146	0.00800748
AT1G51805	-2.08496	0.0076773
AT1G51850	-2.74931	0.0406621
AT1G51940	-1.45872	0.00259009
AT1G52000	2.86647	0.0132283
AT1G52040	2.83812	0.0108315
AT1G52080	2.31506	0.0127132
AT1G52140	-2.6134	0.0138654
AT1G52200	-3.70589	0.012543
AT1G52220	-1.82466	0.0139855
AT1G52230	-1.96647	0.00980347
AT1G52280	-1.27386	0.00685127
AT1G52290	-3.25509	0.00238097
AT1G52450	2.23763	0.0353112
AT1G52510	-1.84134	0.00298294
AT1G52565	2.10439	0.0422838
AT1G52570	1.80707	0.0269461
AT1G52590	1.10285	0.0127036
AT1G52690	10.336	0.0169807
AT1G52700	-3.0275	0.00433031
AT1G52720	-1.1365	0.0038582
AT1G52750	-4.39483	0.00315832
AT1G52820	1.11442	0.0402136
AT1G52830	-3.3098	0.0472976
AT1G52855	1.5225	0.00496034
AT1G52890	2.96665	0.00126554
AT1G52905	1.15879	0.00365667
AT1G52920	3.67383	0.0147416
AT1G53035	1.10406	0.00330832
AT1G53090	1.14775	0.0198767
AT1G53100	2.02445	0.0187958
AT1G53110	1.59792	0.00449417
AT1G53140	-3.24735	0.00426721
AT1G53170	1.70247	0.0143064
AT1G53200	1.40339	0.0216092
AT1G53230	-1.69201	0.0018221
AT1G53240	-1.41537	0.0106169
AT1G53250	-1.24568	0.0195753
AT1G53280	1.12443	0.00126554
AT1G53300	-1.04761	0.0163871
AT1G53390	-1.08396	0.0248452
AT1G53430	-1.27589	0.0245439
AT1G53460	1.42367	0.00213957
AT1G53520	-5.28698	0.0053193
AT1G53580	1.55157	0.0242902
AT1G53720	1.03311	0.00700399
AT1G53780	1.1754	0.0244687
AT1G53790	1.44153	0.0153398
AT1G53830	-1.02547	0.0413292
AT1G53840	-1.32776	0.0102544
AT1G53887	1.79785	0.00123106
AT1G54000	-3.70733	0.0212986
AT1G54010	-2.88927	0.01594
AT1G54100	2.85687	0.0028141
AT1G54110	1.53222	0.0343841
AT1G54160	2.37026	0.0161287
AT1G54217	-1.72325	0.0074822
AT1G54380	1.0285	0.013253
AT1G54385	-4.21863	0.0174793
AT1G54450	-1.38418	0.0141493
AT1G54460	-1.0713	0.0292725
AT1G54570	1.56214	0.0158396
AT1G54575	3.28413	0.004287
AT1G54860	3.31378	0.00731463
AT1G54870	6.72079	0.0371564
AT1G55160	-1.5098	0.00164781
AT1G55200	-1.85715	0.0223814
AT1G55260	-1.07773	0.00264221
AT1G55310	1.1955	0.00814734
AT1G55330	-3.14719	0.00195083
AT1G55380	-2.79953	0.0116299
AT1G55450	-1.09393	0.00279276
AT1G55490	-1.17737	0.0460219
AT1G55670	-1.80517	0.0148705
AT1G55760	1.83053	0.0143023
AT1G55810	-1.21939	0.00422447
AT1G55920	2.07845	0.00434765
AT1G56190	-1.28423	0.00938433
AT1G56210	-1.41299	0.046578
AT1G56230	1.14534	0.00445441
AT1G56240	-3.47001	0.00264012
AT1G56280	1.40245	0.0103434
AT1G56430	-4.0018	0.0329631
AT1G56500	-1.01274	0.0132943
AT1G56600	3.60077	0.00258028
AT1G56650	3.8086	0.00264012
AT1G57590	4.76849	0.00791159
AT1G57680	-1.28538	0.00195848
AT1G57770	-1.205	0.0197316
AT1G57820	-3.05872	0.00454725
AT1G57990	-2.68117	0.00134616
AT1G58120	-1.98392	0.0162409
AT1G58235	1.19558	0.00601929
AT1G58270	2.56603	0.00235183
AT1G58360	1.96236	0.00404177
AT1G58370	-1.25716	0.0318957
AT1G58440	-1.11764	0.00873391
AT1G58520	1.6985	0.0348153
AT1G58602	-1.1597	0.0279404
AT1G59640	2.04434	0.00753546
AT1G59670	3.11135	0.0121169
AT1G59700	1.56444	0.00948312
AT1G59840	-1.23425	0.0305344
AT1G59860	-1.4859	0.00637284
AT1G60060	-2.37634	0.0290546
AT1G60110	-4.22937	0.0132283
AT1G60190	4.77645	0.000692563
AT1G60550	-1.58438	0.00789135
AT1G60590	-2.96925	0.00984867
AT1G60600	-1.11066	0.00752785
AT1G60610	1.68456	0.0110495
AT1G60630	-1.31936	0.0198807
AT1G60660	-1.1264	0.0162416
AT1G60800	-1.23868	0.0311211
AT1G60890	1.27483	0.0271969
AT1G60950	-1.67548	0.0106319
AT1G60970	5.4217	0.00910063
AT1G60986	1.66948	0.0070978
AT1G60987	3.67471	0.00460535
AT1G60989	2.18629	0.00352282
AT1G61100	-1.50048	0.00280929
AT1G61130	-1.73723	0.0267539
AT1G61170	-1.93409	0.0170056
AT1G61450	-4.10899	0.0134282
AT1G61460	1.66253	0.0067869
AT1G61700	2.61619	0.0364719
AT1G61740	-2.02486	0.0135627
AT1G61800	4.03971	0.0200223
AT1G61810	3.4985	0.0323943
AT1G61890	1.57933	0.00227681
AT1G61900	-1.18728	0.00923408
AT1G61970	1.13278	0.00987142
AT1G62290	2.91422	0.000692563
AT1G62320	-1.73723	0.0267539
AT1G62333	1.55023	0.0132014
AT1G62370	2.71513	0.00364604
AT1G62380	-2.304	0.00126554
AT1G62440	-2.94692	0.0226944
AT1G62480	-2.87515	0.00197311
AT1G62500	-5.13096	0.00394319
AT1G62510	3.4881	0.00104066
AT1G62520	-2.54118	0.0408412
AT1G62540	1.43105	0.00561719
AT1G62560	1.22148	0.00412606
AT1G62570	2.9632	0.00328159
AT1G62610	1.24621	0.0119009
AT1G62620	4.54175	0.00731463
AT1G62700	-2.51047	0.0115151
AT1G62710	2.99432	0.00327977
AT1G62780	-1.14747	0.0155619
AT1G62790	-1.39486	0.00928758
AT1G62810	1.95928	0.00628369
AT1G63010	1.64717	0.00227527
AT1G63050	1.04891	0.0431508
AT1G63055	2.69712	0.0266298
AT1G63100	-2.07508	0.0279067
AT1G63180	-1.76832	0.00638135
AT1G63220	-1.98225	0.00851917
AT1G63245	1.76407	0.046509
AT1G63250	1.07879	0.0293349
AT1G63260	-3.00188	0.0120223
AT1G63310	-1.42546	0.0115456
AT1G63370	2.25509	0.00988483
AT1G63380	1.81015	0.0253343
AT1G63420	1.20815	0.00765734
AT1G63480	-1.85122	0.00731844
AT1G63630	-2.15685	0.00877599
AT1G63710	-5.43647	0.000692563
AT1G63720	1.20771	0.0319285
AT1G63840	1.93849	0.00315133
AT1G63910	3.97375	0.00346017
AT1G64110	8.4855	0.00130401
AT1G64170	-3.38802	0.00195083
AT1G64180	1.64819	0.00460535
AT1G64200	-1.93544	0.0133527
AT1G64253	1.30819	0.0492325
AT1G64370	1.27471	0.00588959
AT1G64450	-1.63339	0.0405026
AT1G64510	-1.77936	0.00742465
AT1G64640	-2.19193	0.00245371
AT1G64660	2.60618	0.00558465
AT1G64670	-2.91113	0.00647758
AT1G64760	-1.10362	0.0247833
AT1G64810	1.40178	0.00749826
AT1G64890	1.29355	0.00475525
AT1G64900	1.78672	0.00213234
AT1G64940	1.52167	0.0230936
AT1G64950	2.08395	0.00527267
AT1G64970	1.50177	0.00748323
AT1G65010	-1.89771	0.000964788
AT1G65040	1.21741	0.00414164
AT1G65090	3.44124	0.00181961
AT1G65230	-1.78564	0.000964788
AT1G65240	-2.08435	0.0479617
AT1G65295	-1.08578	0.0113633
AT1G65346	1.50552	0.00684963
AT1G65350	1.07418	0.0157754
AT1G65390	-6.35154	0.00443424
AT1G65450	-4.59704	0.014388
AT1G65470	-1.59691	0.0257343
AT1G65486	-2.63344	0.0403249
AT1G65490	-1.21502	0.0486127
AT1G65590	-1.99112	0.0233312
AT1G65660	1.55298	0.00280189
AT1G65690	2.33063	0.0105798
AT1G65710	-5.6097	0.002257
AT1G65890	2.5025	0.002307
AT1G65980	1.30918	0.00646453
AT1G66040	-2.0295	0.0454084
AT1G66050	-3.50297	0.0276159
AT1G66100	-6.55678	0.00995778
AT1G66150	-1.10461	0.0483737
AT1G66173	-3.43706	0.0147674
AT1G66180	-2.19475	0.00121313
AT1G66200	-1.28372	0.049484
AT1G66240	1.14075	0.00443747
AT1G66350	-1.97687	0.0378486
AT1G66390	4.37167	0.0143281
AT1G66620	-2.29669	0.0115151
AT1G66830	2.08558	0.00147828
AT1G66840	2.20606	0.00453163
AT1G66890	1.20467	0.00622434
AT1G66930	-5.10342	0.00452862
AT1G66940	-6.19169	0.00376305
AT1G66970	-1.88391	0.0235257
AT1G67035	-3.20291	0.0454206
AT1G67090	-2.87152	0.00283734
AT1G67105	1.14033	0.0482994
AT1G67300	1.82064	0.00784999
AT1G67320	-1.52343	0.0177257
AT1G67340	1.25447	0.0307202
AT1G67360	2.46371	0.00457019
AT1G67365	2.74065	0.00452531
AT1G67480	-1.62363	0.00732086
AT1G67590	1.1514	0.0120344
AT1G67630	-1.83525	0.0192707
AT1G67740	-2.71307	0.0288159
AT1G67750	-3.13436	0.00331813
AT1G67830	-1.44399	0.0103178
AT1G67856	1.87368	0.0129532
AT1G67910	-1.34427	0.00787731
AT1G67920	3.79571	0.00416691
AT1G68110	-2.10531	0.00965088
AT1G68170	-1.98682	0.0125488
AT1G68238	-2.30672	0.0196835
AT1G68330	-2.09381	0.00833056
AT1G68360	1.5202	0.00869883
AT1G68400	-2.23112	0.00597893
AT1G68450	4.98981	0.000964788
AT1G68510	-1.90677	0.0258467
AT1G68520	-1.09838	0.0300025
AT1G68570	1.87101	0.00658398
AT1G68585	-1.64705	0.00923408
AT1G68590	-1.42077	0.0061688
AT1G68610	3.70496	0.0113161
AT1G68765	2.53882	0.0292195
AT1G68780	-1.87591	0.00446961
AT1G68840	-3.1247	0.0138582
AT1G68890	-1.60492	0.00423422
AT1G69030	-1.43101	0.00910867
AT1G69040	-1.32513	0.0138014
AT1G69085	-1.98392	0.0162409
AT1G69230	1.07954	0.0047761
AT1G69252	2.91923	0.00230633
AT1G69260	2.69242	0.00195954
AT1G69295	1.81918	0.00684963
AT1G69360	1.37164	0.00336737
AT1G69410	1.22546	0.0137639
AT1G69420	-1.56663	0.00239088
AT1G69430	1.9854	0.021806
AT1G69480	4.44977	0.0122065
AT1G69530	-3.39297	0.00460535
AT1G69540	2.91475	0.00984867
AT1G69610	2.10114	0.021795
AT1G69640	1.0894	0.00524156
AT1G69700	-1.52794	0.0111739
AT1G69740	-1.03127	0.00429371
AT1G69770	-1.99361	0.0230406
AT1G69780	-1.51016	0.0183969
AT1G69790	3.03627	0.00264012
AT1G69800	1.0147	0.00824769
AT1G69870	1.17715	0.0381583
AT1G69900	-2.30606	0.0270823
AT1G69910	-1.03533	0.0194883
AT1G70000	1.40588	0.00765855
AT1G70090	-2.70249	0.00145471
AT1G70160	1.67468	0.00184252
AT1G70185	1.19993	0.0227902
AT1G70270	-4.9455	0.00235183
AT1G70280	-1.27702	0.0115029
AT1G70300	3.3735	0.000964788
AT1G70370	-1.33867	0.0146179
AT1G70390	2.19236	0.0437552
AT1G70410	-2.00803	0.00154742
AT1G70430	-2.3597	0.0422442
AT1G70470	-1.67211	0.0186419
AT1G70550	-1.45398	0.00864882
AT1G70560	-1.11167	0.0108091
AT1G70640	2.87621	0.00280929
AT1G70700	-1.20839	0.00484976
AT1G70820	-2.19589	0.00333118
AT1G70880	-3.46337	0.0210514
AT1G70920	1.9854	0.021173
AT1G70985	-1.87921	0.0314529
AT1G70990	-2.7792	0.0297538
AT1G71050	1.07439	0.036816
AT1G71090	1.03419	0.00375434
AT1G71140	1.05321	0.0276259
AT1G71240	1.09733	0.0244575
AT1G71260	1.38832	0.0294301
AT1G71340	1.74797	0.00195083
AT1G71360	2.24577	0.00416598
AT1G71840	1.07741	0.00685629
AT1G71910	1.83229	0.001864
AT1G71980	1.26503	0.00181961
AT1G72100	3.92598	0.0157624
AT1G72120	1.76933	0.00614036
AT1G72180	-1.32533	0.000964788
AT1G72200	1.93104	0.030698
AT1G72250	-4.5196	0.0186867
AT1G72270	2.07606	0.0241577
AT1G72360	-1.35474	0.00739491
AT1G72416	-5.00542	0.00181961
AT1G72430	-2.36119	0.000692563
AT1G72470	-1.49784	0.0381128
AT1G72510	1.4041	0.0149599
AT1G72610	-5.93516	0.00270772
AT1G72620	-4.90492	0.0143261
AT1G72640	-1.07364	0.0162409
AT1G72680	1.25689	0.00443424
AT1G72690	1.38273	0.0127624
AT1G72700	2.01914	0.00305848
AT1G72730	-1.78745	0.0328831
AT1G72770	3.7736	0.000692563
AT1G72830	1.63866	0.0144522
AT1G72930	-2.7213	0.0115029
AT1G72940	-1.25915	0.0464912
AT1G72970	-1.8418	0.0119292
AT1G73010	2.81519	0.0236282
AT1G73040	3.25607	0.0194562
AT1G73110	-1.23698	0.0122805
AT1G73210	1.69989	0.0186419
AT1G73220	5.44879	0.00322468
AT1G73260	4.48497	0.0241577
AT1G73390	3.25073	0.00145471
AT1G73600	-2.54336	0.00288799
AT1G73620	-3.72078	0.039113
AT1G73655	-1.4667	0.00698793
AT1G73680	1.96717	0.00720459
AT1G73687	3.14272	0.0443822
AT1G73710	1.01742	0.00287591
AT1G73810	2.35303	0.00752785
AT1G73830	-1.66562	0.0417112
AT1G73910	2.62759	0.00320594
AT1G74010	2.35875	0.015827
AT1G74020	1.65317	0.0239923
AT1G74070	-1.56968	0.0145379
AT1G74080	1.55211	0.00815902
AT1G74440	-1.40809	0.00901219
AT1G74560	1.69532	0.00582822
AT1G74675	-2.03605	0.0460206
AT1G74690	-1.79122	0.0220998
AT1G74730	-1.36955	0.00430328
AT1G74770	2.16119	0.00803231
AT1G74790	-1.54004	0.00736308
AT1G74890	-3.0192	0.010276
AT1G74910	-1.30296	0.00983935
AT1G74950	-1.00514	0.0154145
AT1G74970	-1.09601	0.00489308
AT1G75150	-1.5141	0.0206514
AT1G75170	1.32231	0.037528
AT1G75180	-1.58281	0.0176257
AT1G75190	-1.01351	0.0194975
AT1G75220	-1.17923	0.00684963
AT1G75250	-4.71315	0.0150016
AT1G75370	1.19945	0.00445441
AT1G75500	-1.9794	0.041734
AT1G75590	-2.93908	0.00473123
AT1G75640	-3.28255	0.027754
AT1G75690	-1.98743	0.0063329
AT1G75750	-5.44246	0.00277001
AT1G75810	1.35837	0.00280986
AT1G75840	-1.11046	0.00288799
AT1G75960	-3.97764	0.00144133
AT1G76080	-1.51647	0.00554474
AT1G76090	-2.76502	0.000964788
AT1G76160	-3.60746	0.00178524
AT1G76180	1.01381	0.00592934
AT1G76240	-4.3542	0.00443747
AT1G76280	1.00056	0.022166
AT1G76310	-4.50799	0.00411269
AT1G76380	1.06832	0.0425798
AT1G76420	-1.98682	0.0125488
AT1G76530	-2.15027	0.0460219
AT1G76540	-2.46642	0.00428134
AT1G76560	1.26812	0.0209551
AT1G76580	1.29592	0.0127132
AT1G76590	2.14735	0.00711943
AT1G76680	-1.74215	0.00407475
AT1G76740	-2.36027	0.041721
AT1G76820	1.08004	0.0224432
AT1G76890	-1.15347	0.0173505
AT1G76955	1.26523	0.00851747
AT1G76960	1.54824	0.0265135
AT1G76980	2.00927	0.0127357
AT1G76990	-1.49631	0.0132399
AT1G77000	1.37159	0.00997708
AT1G77010	2.62187	0.0304005
AT1G77120	2.65041	0.0211145
AT1G77145	2.39824	0.0239531
AT1G77200	1.93885	0.0144205
AT1G77370	1.2532	0.00984867
AT1G77450	3.186	0.00739902
AT1G77490	-2.13545	0.00448155
AT1G77510	1.05304	0.0203047
AT1G77520	2.78281	0.0136109
AT1G77530	1.91273	0.0149599
AT1G77570	1.24661	0.00712043
AT1G77580	2.68873	0.0204932
AT1G77630	-1.78801	0.0111792
AT1G77640	-3.55235	0.017363
AT1G77690	-2.67483	0.0114408
AT1G77710	1.0156	0.00895797
AT1G77760	-1.79182	0.0374518
AT1G77810	1.2287	0.00856753
AT1G77950	4.90623	0.00231888
AT1G77990	-1.32898	0.00574985
AT1G78000	-2.73641	0.00674882
AT1G78070	3.01458	0.00126554
AT1G78170	-1.87251	0.00344733
AT1G78190	1.00235	0.0103302
AT1G78260	-1.44921	0.0203294
AT1G78300	-1.30068	0.00108768
AT1G78450	-4.69746	0.00259009
AT1G78510	1.09186	0.00642674
AT1G78610	1.40824	0.0499997
AT1G78630	-1.01853	0.0270501
AT1G78670	1.41527	0.0109973
AT1G78850	1.17807	0.0175894
AT1G78860	-2.29086	0.0376357
AT1G78865	-4.861	0.0134624
AT1G78995	-1.29508	0.0392596
AT1G79160	1.296	0.00245371
AT1G79270	3.08289	0.00139936
AT1G79310	-2.77009	0.0114749
AT1G79450	1.67643	0.0194144
AT1G79500	-1.38839	0.0187355
AT1G79520	3.44065	0.000964788
AT1G79610	1.66469	0.00471688
AT1G79700	-2.53911	0.0343119
AT1G79720	-2.15443	0.0070978
AT1G79880	1.2773	0.00977336
AT1G79900	4.07997	0.000964788
AT1G79970	1.33472	0.00248086
AT1G80090	3.92913	0.00264012
AT1G80100	-1.73723	0.0267539
AT1G80110	2.39351	0.00416598
AT1G80130	3.66875	0.00524156
AT1G80160	4.78055	0.00594643
AT1G80280	-3.63217	0.0129978
AT1G80300	1.62247	0.00495555
AT1G80370	-4.07691	0.0140993
AT1G80380	-1.22458	0.00468886
AT1G80530	1.10672	0.00142995
AT1G80560	-1.13584	0.0136536
AT1G80610	1.03518	0.0130013
AT1G80640	-1.10388	0.0220603
AT1G80820	2.99594	0.0347685
AT2G01100	1.03286	0.0198084
AT2G01175	1.49006	0.0347347
AT2G01180	-1.20368	0.0148207
AT2G01300	-2.67251	0.00966779
AT2G01350	1.00221	0.0356722
AT2G01390	2.70473	0.0142633
AT2G01400	1.20321	0.0469773
AT2G01490	1.06353	0.0157403
AT2G01505	1.36031	0.0140827
AT2G01540	1.31276	0.00873992
AT2G01590	-1.23843	0.0100406
AT2G01660	-1.38002	0.0243955
AT2G01670	-1.34377	0.00428134
AT2G01818	-3.42657	0.00679254
AT2G01870	-1.02836	0.0231911
AT2G01890	5.10286	0.0488732
AT2G01910	-1.40219	0.00416598
AT2G01918	-1.28693	0.0475135
AT2G02147	-4.06453	0.00619648
AT2G02350	1.38166	0.0106089
AT2G02380	2.57256	0.0321855
AT2G02390	1.41841	0.0173643
AT2G02450	-1.2321	0.00569581
AT2G02500	-1.17028	0.00673639
AT2G02540	1.58608	0.0467411
AT2G02820	-1.44256	0.0108315
AT2G02950	-1.69725	0.0495635
AT2G03200	2.24308	0.0343833
AT2G03260	1.25771	0.0308453
AT2G03350	-2.05551	0.00742513
AT2G03360	3.10009	0.00804992
AT2G03710	1.25096	0.0242974
AT2G03850	3.86464	0.00270772
AT2G04032	-4.24238	0.0199235
AT2G04100	2.06302	0.00264012
AT2G04205	-2.73026	0.0313056
AT2G04240	1.97804	0.00772947
AT2G04350	1.48062	0.00682284
AT2G04780	-2.71176	0.000964788
AT2G04790	-1.8077	0.0139681
AT2G04795	-1.83481	0.00970563
AT2G04805	4.25699	0.00272245
AT2G04890	1.01079	0.0347347
AT2G05075	1.30208	0.00552923
AT2G05185	1.47035	0.00504383
AT2G05315	1.34586	0.0395805
AT2G05530	1.2297	0.00588316
AT2G05540	2.00115	0.0434529
AT2G05695	2.45036	0.0433887
AT2G05765	1.01342	0.0313349
AT2G05790	-2.57599	0.00443747
AT2G05810	-1.71523	0.019609
AT2G06520	-1.38277	0.0140382
AT2G06850	-4.04315	0.000494472
AT2G06925	-2.28514	0.00195083
AT2G07170	-4.21318	0.0128387
AT2G07643	1.53844	0.0315113
AT2G07652	1.11775	0.0184706
AT2G07674	1.20275	0.0416351
AT2G07675	1.30672	0.0149575
AT2G07702	2.64603	0.0160272
AT2G07706	1.10405	0.00383091
AT2G07714	2.73459	0.0360613
AT2G07727	1.38932	0.013143
AT2G07748	1.91273	0.0149599
AT2G07749	1.17067	0.0438523
AT2G08630	1.66948	0.0070978
AT2G08765	1.14104	0.0221761
AT2G08900	1.56292	0.0221647
AT2G08950	-4.16652	0.0112925
AT2G09150	2.29914	0.0282169
AT2G10606	-2.18222	0.0327458
AT2G10940	-8.47821	0.00810545
AT2G12190	2.37022	0.0165817
AT2G12400	2.81955	0.00573981
AT2G12550	1.40592	0.00233132
AT2G13290	1.18176	0.0092763
AT2G13610	-1.45286	0.042319
AT2G13790	-1.36251	0.0194485
AT2G13820	-3.74125	0.00342784
AT2G13960	1.24063	0.037994
AT2G14247	-2.96959	0.0319146
AT2G14580	-1.74686	0.00910063
AT2G14825	1.25229	0.00565049
AT2G14878	2.71191	0.00264012
AT2G14890	-2.11153	0.00443747
AT2G15020	1.80455	0.0379781
AT2G15090	-2.66629	0.000964788
AT2G15280	-1.36961	0.0283697
AT2G15480	3.17068	0.00107789
AT2G15490	2.73091	0.014892
AT2G15880	-1.56787	0.0331428
AT2G15970	1.52802	0.00279276
AT2G16060	-1.56434	0.00574985
AT2G16280	-1.24694	0.00231288
AT2G16586	1.05268	0.00560208
AT2G16595	1.74713	0.00139523
AT2G16660	-3.84305	0.013253
AT2G16700	1.4384	0.0201147
AT2G16720	2.57452	0.00126554
AT2G16770	1.92279	0.0047761
AT2G16790	1.06543	0.0419964
AT2G16850	-2.73059	0.0280073
AT2G16990	4.34157	0.00393243
AT2G17050	-1.49724	0.00971338
AT2G17230	-3.01554	0.000964788
AT2G17620	-2.18862	0.0221942
AT2G17680	4.08259	0.0290751
AT2G17780	-3.25613	0.0358613
AT2G17840	1.53606	0.0124954
AT2G17880	-2.56094	0.00196141
AT2G18050	4.60432	0.00305848
AT2G18100	1.32375	0.00682787
AT2G18170	1.42742	0.00482393
AT2G18196	1.03378	0.00886906
AT2G18230	1.50103	0.0029231
AT2G18240	1.47002	0.0164496
AT2G18290	-1.09328	0.0288502
AT2G18328	-2.97922	0.0225085
AT2G18540	3.87922	0.00237429
AT2G18550	2.58417	0.0396123
AT2G18600	1.35629	0.00865927
AT2G18700	-1.35058	0.0185732
AT2G18780	1.55241	0.0106235
AT2G18910	-1.85005	0.00179895
AT2G18950	1.50323	0.00363036
AT2G19170	-2.90103	0.00696651
AT2G19240	1.40908	0.0453838
AT2G19310	1.02666	0.00414638
AT2G19330	1.68308	0.0315165
AT2G19385	1.12555	0.0202141
AT2G19590	-2.59563	0.00852364
AT2G19620	-1.80001	0.0265444
AT2G19660	-4.08741	0.0121794
AT2G19690	-2.43223	0.0131874
AT2G19780	-1.24932	0.0162416
AT2G19800	-6.39334	0.00280869
AT2G19810	2.25075	0.00461335
AT2G19860	1.98895	0.00581113
AT2G19880	-1.24153	0.0387286
AT2G19900	8.22864	0.0246202
AT2G19920	-2.36235	0.0177288
AT2G19930	1.01168	0.0205089
AT2G19970	-5.05652	0.00833056
AT2G19990	-3.18012	0.0199471
AT2G20260	-1.04401	0.0410536
AT2G20400	1.72813	0.00330832
AT2G20490	1.04308	0.00804992
AT2G20562	-4.47118	0.00313328
AT2G20590	-4.04343	0.00506747
AT2G20670	-1.97403	0.0137779
AT2G20770	2.30519	0.0102737
AT2G20870	-6.98818	0.000494472
AT2G21060	-1.24778	0.0173878
AT2G21080	-1.59361	0.00486187
AT2G21100	2.15804	0.0455026
AT2G21140	-4.94352	0.00156218
AT2G21180	2.69252	0.00175707
AT2G21187	2.85597	0.0454229
AT2G21220	-2.82575	0.0203445
AT2G21260	1.7705	0.0132311
AT2G21320	2.27197	0.00457623
AT2G21560	1.3903	0.0111929
AT2G21590	3.80663	0.0443499
AT2G21620	1.45254	0.00290778
AT2G21650	-5.27741	0.00563372
AT2G21780	3.81955	0.00832148
AT2G21790	-1.12507	0.0118032
AT2G21820	7.22152	0.00269191
AT2G21840	-2.26515	0.0280231
AT2G22080	1.78795	0.00348346
AT2G22122	-4.0221	0.0465274
AT2G22125	-1.48176	0.00195083
AT2G22140	-2.57605	0.0176686
AT2G22170	-1.43366	0.00665996
AT2G22190	1.65246	0.000964788
AT2G22420	1.55322	0.00944966
AT2G22510	2.70286	0.0348153
AT2G22570	1.12094	0.0315334
AT2G22610	-3.4786	0.00370766
AT2G22821	1.51838	0.004864
AT2G22830	-1.77177	0.00367914
AT2G22900	1.2481	0.00221056
AT2G23030	3.22188	0.0173643
AT2G23130	-2.76284	0.00331289
AT2G23170	-1.39564	0.0286635
AT2G23240	4.27728	0.0220434
AT2G23290	-2.28715	0.00452434
AT2G23320	-1.11104	0.0150844
AT2G23380	-1.93849	0.0210779
AT2G23560	-2.60472	0.00154742
AT2G23600	-2.75432	0.00101289
AT2G23660	1.91273	0.0149599
AT2G23690	-3.78421	0.0134624
AT2G23700	-1.459	0.0294152
AT2G24090	-1.18339	0.00808496
AT2G24170	-1.3326	0.0128106
AT2G24270	1.04244	0.0168875
AT2G24280	1.00522	0.0128949
AT2G24395	-2.43952	0.00191707
AT2G24430	2.33179	0.0435041
AT2G24490	-2.28608	0.00860842
AT2G24600	-1.65202	0.00331289
AT2G24610	-2.56127	0.00210838
AT2G24645	-1.72315	0.029081
AT2G24692	-3.34028	0.00259009
AT2G24700	-3.04483	0.0442317
AT2G24870	1.92508	0.0430048
AT2G24940	1.43403	0.00297603
AT2G24990	1.48898	0.0140576
AT2G25060	-5.63564	0.00195083
AT2G25140	1.15287	0.0207946
AT2G25220	-1.78496	0.0324613
AT2G25270	-2.66963	0.0219223
AT2G25450	1.76459	0.0188772
AT2G25460	1.40367	0.0402108
AT2G25510	-2.82071	0.00287085
AT2G25620	1.71777	0.0221644
AT2G25625	3.64069	0.00290778
AT2G25680	1.86765	0.00436857
AT2G25735	-2.59223	0.00258828
AT2G25780	-1.91153	0.0180232
AT2G25810	-4.80312	0.00318203
AT2G25820	2.78621	0.014189
AT2G25880	-1.92896	0.0410593
AT2G25964	1.94279	0.00113611
AT2G26010	-6.07421	0.0170531
AT2G26020	-6.57636	0.013313
AT2G26355	2.29832	0.00356674
AT2G26440	-2.10141	0.0111739
AT2G26520	-4.19473	0.0020724
AT2G26530	-2.17839	0.0178503
AT2G26540	-1.07659	0.00272729
AT2G26730	-1.27197	0.0067869
AT2G26760	-4.24703	0.0133419
AT2G26860	1.24859	0.0135772
AT2G26910	-1.44401	0.018527
AT2G27035	-2.38681	0.0445531
AT2G27040	-1.03837	0.0227044
AT2G27060	-1.26504	0.0202144
AT2G27150	1.29093	0.0324386
AT2G27180	2.06441	0.0282256
AT2G27190	1.13604	0.0114908
AT2G27389	2.29298	0.0499997
AT2G27402	-2.99232	0.00820455
AT2G27505	-1.49724	0.00971338
AT2G27690	-2.34686	0.0148705
AT2G27810	-1.35486	0.00447677
AT2G27820	-1.37626	0.00291574
AT2G27830	1.0267	0.0265506
AT2G27930	-2.53033	0.0173505
AT2G27970	-1.428	0.0391737
AT2G27990	1.75132	0.00689678
AT2G28080	-2.1532	0.00627196
AT2G28140	-3.74679	0.0124101
AT2G28190	-1.93785	0.00315832
AT2G28210	-4.56264	0.00290225
AT2G28400	1.88534	0.00338836
AT2G28500	2.70012	0.0125447
AT2G28550	1.15734	0.007019
AT2G28605	-1.15841	0.0180046
AT2G28620	-4.59418	0.0182761
AT2G28630	-4.36362	0.0225085
AT2G28680	2.60035	0.0220013
AT2G28740	-1.57834	0.00376305
AT2G28790	-2.1981	0.0050304
AT2G28840	1.46664	0.00259009
AT2G28910	1.20908	0.0134283
AT2G28950	-3.4218	0.00941044
AT2G29090	2.95872	0.0225744
AT2G29130	2.74628	0.0460791
AT2G29140	1.46181	0.00449417
AT2G29300	3.74909	0.00126554
AT2G29350	3.12848	0.0186461
AT2G29370	1.91296	0.0120818
AT2G29420	1.15798	0.0108091
AT2G29460	2.94406	0.0181862
AT2G29470	4.30373	0.0116143
AT2G29550	-1.41211	0.038061
AT2G29570	-2.0324	0.0286057
AT2G29680	-3.80799	0.00593126
AT2G29710	-1.74886	0.0469433
AT2G29950	2.87277	0.0176167
AT2G29980	-2.16377	0.00245371
AT2G29990	1.44902	0.020219
AT2G30000	1.01094	0.0169807
AT2G30010	-6.68403	0.0027154
AT2G30100	1.09108	0.0251804
AT2G30140	1.60492	0.0107682
AT2G30370	-3.46629	0.00876458
AT2G30420	-2.75987	0.0399222
AT2G30432	-5.64008	0.00545799
AT2G30480	1.42035	0.0378004
AT2G30540	1.72688	0.0213774
AT2G30550	2.01894	0.0018591
AT2G30570	-1.45716	0.0245439
AT2G30600	-3.14077	0.0355931
AT2G30790	1.19583	0.0202144
AT2G30890	-2.58181	0.041021
AT2G30930	-1.89363	0.00786474
AT2G30990	-1.43023	0.0083721
AT2G31010	-3.33596	0.00577613
AT2G31020	-3.09227	0.0472976
AT2G31180	3.08456	0.0156477
AT2G31270	-2.47379	0.0288506
AT2G31280	1.31908	0.00216342
AT2G31350	1.25845	0.00715019
AT2G31585	2.01941	0.00458636
AT2G31600	1.16348	0.0061688
AT2G31730	-4.81955	0.0163041
AT2G31810	-1.51992	0.0157754
AT2G31930	3.77446	0.0151175
AT2G31945	3.53005	0.0133527
AT2G31960	1.1513	0.00438526
AT2G31970	1.33317	0.0136109
AT2G31985	2.6106	0.0128387
AT2G31990	1.56606	0.00505305
AT2G32080	-1.18896	0.0484753
AT2G32090	1.48933	0.00380336
AT2G32100	-2.53381	0.0202218
AT2G32120	2.86868	0.00108164
AT2G32200	-3.22394	0.0137242
AT2G32220	1.04038	0.0303708
AT2G32280	-1.88496	0.0456691
AT2G32380	-3.61575	0.0124986
AT2G32400	-1.46586	0.0347347
AT2G32430	1.61836	0.0132283
AT2G32487	-1.50723	0.0455279
AT2G32500	-1.66474	0.00280596
AT2G32530	2.57814	0.0067175
AT2G32640	-1.49671	0.0195603
AT2G32690	-2.55962	0.0102544
AT2G32765	-1.74019	0.034184
AT2G32795	1.03505	0.0140642
AT2G32870	1.36102	0.00250557
AT2G33080	5.6847	0.00195083
AT2G33280	4.87572	0.00277001
AT2G33310	1.09382	0.00457019
AT2G33330	-4.18752	0.0138329
AT2G33350	-2.65254	0.0366692
AT2G33380	2.52596	0.00140775
AT2G33400	-3.47052	0.0188469
AT2G33560	-3.38489	0.0225871
AT2G33585	1.25786	0.0354674
AT2G33590	3.01241	0.00434349
AT2G33793	-3.69285	0.0283227
AT2G33850	-3.6035	0.00195954
AT2G34060	-1.97901	0.0330874
AT2G34070	-2.16038	0.00280986
AT2G34080	2.42829	0.0454223
AT2G34170	-2.4761	0.0215167
AT2G34180	-2.64868	0.028572
AT2G34190	-3.94491	0.0266988
AT2G34300	-1.99664	0.00352292
AT2G34310	1.20747	0.00443747
AT2G34360	-3.43745	0.0301041
AT2G34430	-5.3527	0.00173928
AT2G34500	2.63586	0.00336737
AT2G34510	-3.09902	0.004507
AT2G34620	-2.59115	0.0060051
AT2G34680	-1.95373	0.0118683
AT2G34720	2.03301	0.0104479
AT2G34730	1.61532	0.00156218
AT2G34770	-1.23931	0.00787731
AT2G34790	1.88857	0.0190832
AT2G34810	1.25462	0.00815902
AT2G34850	4.82172	0.0256566
AT2G34900	1.21113	0.00113611
AT2G34925	-1.10354	0.0127357
AT2G34930	-2.28913	0.0158738
AT2G35060	1.98095	0.00246167
AT2G35070	4.82633	0.00173343
AT2G35190	-1.80305	0.0147552
AT2G35210	-2.5302	0.0254851
AT2G35300	6.91341	0.037872
AT2G35343	5.03164	0.0138329
AT2G35370	-1.00287	0.00776487
AT2G35387	1.02571	0.0210277
AT2G35390	-1.30748	0.00216342
AT2G35420	-1.91153	0.0180232
AT2G35637	-2.56527	0.0123826
AT2G35650	-2.66296	0.00227527
AT2G35730	4.81815	0.0361037
AT2G35795	1.00226	0.00418933
AT2G35860	-1.6106	0.004834
AT2G35880	-1.64079	0.00401799
AT2G35930	-4.49427	0.0090725
AT2G35940	1.43488	0.00611463
AT2G35950	2.27392	0.0143651
AT2G36050	-4.25499	0.0101576
AT2G36090	1.29404	0.0358117
AT2G36120	-1.53376	0.0218844
AT2G36200	-3.99831	0.0127132
AT2G36270	2.17773	0.00552923
AT2G36290	1.05469	0.0163871
AT2G36310	-1.29151	0.000964788
AT2G36400	-1.21058	0.0389914
AT2G36570	-1.12461	0.0425711
AT2G36640	4.18385	0.00413002
AT2G36730	1.33066	0.0231086
AT2G36800	1.54435	0.0108275
AT2G36830	-3.44151	0.00223489
AT2G36885	-3.09381	0.0239054
AT2G36895	-1.31184	0.00383091
AT2G36930	1.17871	0.00356947
AT2G36985	-4.76904	0.0101057
AT2G37025	-2.53089	0.0206143
AT2G37050	-1.05062	0.0358432
AT2G37130	-4.58692	0.0044666
AT2G37170	-2.16534	0.0326867
AT2G37180	-2.5489	0.0146057
AT2G37200	1.44253	0.0111706
AT2G37230	1.148	0.0310174
AT2G37240	1.12691	0.00956952
AT2G37300	1.85853	0.00445441
AT2G37340	1.499	0.00119364
AT2G37390	-2.60241	0.0117176
AT2G37410	1.13405	0.0049039
AT2G37450	-1.08986	0.0133444
AT2G37460	-2.47321	0.00216342
AT2G37470	-1.20965	0.00907291
AT2G37510	-1.9395	0.0070978
AT2G37540	-1.14832	0.0380852
AT2G37560	-3.75597	0.0381909
AT2G37585	-1.63913	0.0295046
AT2G37640	-3.14215	0.0211311
AT2G37760	2.5606	0.00430328
AT2G37870	8.19775	0.00247176
AT2G37890	1.10173	0.0366692
AT2G37900	2.54672	0.00259009
AT2G37950	-3.46175	0.00325929
AT2G37970	2.40919	0.000964788
AT2G38120	-2.45986	0.0146057
AT2G38140	-1.29683	0.00458636
AT2G38160	-2.95815	0.0351803
AT2G38180	1.24696	0.0110246
AT2G38290	-1.11822	0.0137391
AT2G38310	-6.40294	0.000964788
AT2G38340	4.08612	0.00839446
AT2G38360	-1.08236	0.00988839
AT2G38450	1.33007	0.00441846
AT2G38530	2.93571	0.00253273
AT2G38540	1.29031	0.011297
AT2G38550	1.16531	0.00984643
AT2G38670	1.089	0.0359829
AT2G38750	-1.2939	0.0395805
AT2G38800	1.11057	0.0278516
AT2G38810	-2.33598	0.0188861
AT2G38820	1.02657	0.00673639
AT2G38970	-1.31165	0.00489259
AT2G39030	2.49375	0.0470108
AT2G39050	2.02798	0.00851747
AT2G39180	-2.37783	0.0315642
AT2G39200	-1.43067	0.0258467
AT2G39220	-1.09473	0.0105302
AT2G39250	3.2155	0.00831078
AT2G39320	1.91792	0.00834062
AT2G39375	2.68716	0.0259622
AT2G39470	-1.40793	0.0130326
AT2G39510	2.93393	0.00996621
AT2G39681	1.10369	0.00245371
AT2G39725	1.45563	0.00701717
AT2G39730	-1.62535	0.0187277
AT2G39800	4.2584	0.00169563
AT2G39870	-2.39935	0.00195083
AT2G39880	-3.22858	0.00208323
AT2G39890	-1.24337	0.00322536
AT2G39900	-2.08197	0.00311684
AT2G40095	-1.49677	0.026336
AT2G40100	-2.22181	0.00433031
AT2G40170	5.56034	0.0488296
AT2G40330	-7.7164	0.00181961
AT2G40350	2.0182	0.0437552
AT2G40370	2.91666	0.0370804
AT2G40435	3.04284	0.0139855
AT2G40490	-1.25478	0.00418933
AT2G40610	-4.86815	0.0391375
AT2G40620	-1.57944	0.00696651
AT2G40670	-1.94386	0.0181642
AT2G40700	1.9734	0.00784999
AT2G40820	-2.50488	0.00849366
AT2G40900	1.26328	0.00330832
AT2G40950	1.4172	0.0324613
AT2G41000	1.28816	0.0083721
AT2G41070	1.93447	0.015743
AT2G41090	-3.46573	0.00620586
AT2G41100	-3.34679	0.000964788
AT2G41110	-1.01163	0.0382847
AT2G41170	-1.98066	0.0311602
AT2G41190	6.10443	0.00142995
AT2G41200	1.39312	0.0047761
AT2G41210	2.79709	0.00416598
AT2G41280	2.32471	0.0106089
AT2G41290	1.45934	0.0315801
AT2G41380	1.37204	0.0479834
AT2G41410	1.25272	0.00953518
AT2G41420	-1.09035	0.00332772
AT2G41430	-1.18595	0.0106448
AT2G41440	1.00166	0.0187958
AT2G41460	1.0794	0.0387373
AT2G41640	1.33741	0.0267645
AT2G41700	1.05397	0.00126554
AT2G41730	-1.96073	0.0080852
AT2G41770	-1.13481	0.0085342
AT2G41810	1.85313	0.0323005
AT2G41870	2.55844	0.00137346
AT2G41900	1.33372	0.0213774
AT2G41905	1.73169	0.00639091
AT2G41990	-8.33306	0.00253273
AT2G42040	-2.03897	0.00497315
AT2G42110	-3.25394	0.020465
AT2G42220	-1.86585	0.00504106
AT2G42260	-2.59436	0.0102286
AT2G42290	1.14499	0.003641
AT2G42380	-2.14436	0.0131217
AT2G42540	2.52628	0.0174344
AT2G42580	-3.48493	0.000692563
AT2G42640	1.05581	0.0227687
AT2G42770	-1.01252	0.0049039
AT2G42790	2.11496	0.00500805
AT2G42840	-1.74903	0.00299599
AT2G42870	-4.05393	0.0118683
AT2G42880	-1.30587	0.00102222
AT2G42900	-3.26127	0.0174327
AT2G42955	-1.994	0.00489634
AT2G42980	1.91548	0.0105798
AT2G42990	-2.46557	0.0486287
AT2G43030	-1.22336	0.00353745
AT2G43139	1.91792	0.00834062
AT2G43150	-3.00047	0.0048646
AT2G43390	2.57007	0.00272932
AT2G43470	-1.84225	0.0480242
AT2G43500	1.88156	0.0145456
AT2G43520	-1.85445	0.0047761
AT2G43550	-2.2341	0.00800223
AT2G43560	-1.61914	0.00112451
AT2G43570	3.93355	0.00971338
AT2G43580	2.40392	0.00499954
AT2G43590	3.10751	0.0111929
AT2G43600	-1.98392	0.0162409
AT2G43610	-2.56475	0.0192302
AT2G43690	1.66761	0.0400149
AT2G43720	1.56494	0.0147446
AT2G43780	1.2584	0.0192143
AT2G44210	-1.79417	0.0102506
AT2G44280	1.04218	0.0337505
AT2G44500	-3.00613	0.00631369
AT2G44690	-1.87921	0.0145445
AT2G44740	-4.64567	0.00182362
AT2G44745	1.34604	0.0468122
AT2G44790	-3.67799	0.00280189
AT2G44810	-2.14662	0.0202994
AT2G44830	-2.60724	0.00690466
AT2G44850	1.15918	0.0459083
AT2G44930	-2.25253	0.0337321
AT2G45040	2.98617	0.0382138
AT2G45050	-1.7267	0.00491933
AT2G45170	-1.70384	0.0299633
AT2G45180	-3.31318	0.00105768
AT2G45210	1.18647	0.0263949
AT2G45280	1.16436	0.0166069
AT2G45380	1.3052	0.00787879
AT2G45400	-1.01172	0.0244933
AT2G45470	-1.88779	0.00370766
AT2G45490	-2.84253	0.00184934
AT2G45500	1.52245	0.0408271
AT2G45695	1.04298	0.0160212
AT2G45720	1.34548	0.00489634
AT2G45850	-1.29441	0.0376357
AT2G45970	-2.22895	0.00460535
AT2G46130	1.91792	0.00834062
AT2G46160	-2.15688	0.0137391
AT2G46225	-1.58293	0.0173997
AT2G46270	3.24314	0.00148256
AT2G46330	-3.73863	0.000494472
AT2G46440	-1.27321	0.0417371
AT2G46550	1.11079	0.0111488
AT2G46610	1.45783	0.00883665
AT2G46630	-2.1979	0.00524156
AT2G46660	2.71169	0.0149869
AT2G46680	5.76046	0.000854924
AT2G46690	1.17948	0.00363702
AT2G46740	-2.97447	0.016357
AT2G46810	-1.52289	0.0382689
AT2G46820	-2.15381	0.00440054
AT2G46830	3.00208	0.0070978
AT2G46890	-1.75856	0.00434366
AT2G46940	2.38986	0.041551
AT2G46950	4.53622	0.00238244
AT2G47180	2.22272	0.00443747
AT2G47190	2.43403	0.0120889
AT2G47220	1.3675	0.0270501
AT2G47240	-2.361	0.00119364
AT2G47270	1.39276	0.035563
AT2G47370	-1.30106	0.0369446
AT2G47440	-2.45026	0.00406319
AT2G47600	1.05969	0.00698902
AT2G47670	2.85435	0.00724236
AT2G47730	-1.88527	0.00121313
AT2G47770	8.90275	0.00334682
AT2G47780	2.31511	0.00605964
AT2G47890	1.55308	0.0080852
AT2G47930	-2.30393	0.00962992
AT2G48030	-2.60091	0.00184252
AT2G48070	-1.27384	0.00181961
AT2G48130	1.80266	0.029269
AT3G00980	2.00418	0.0356809
AT3G01100	1.63655	0.00363438
AT3G01290	-3.86726	0.00250557
AT3G01410	-1.46708	0.015491
AT3G01420	5.30977	0.00325108
AT3G01450	-1.19062	0.0162459
AT3G01480	-1.95888	0.00181961
AT3G01490	-1.26275	0.00910063
AT3G01500	-4.52368	0.00352227
AT3G01520	1.22754	0.00863041
AT3G01550	-4.54354	0.00416598
AT3G01570	6.20711	0.00573981
AT3G01600	-2.28025	0.0251238
AT3G01710	-3.4692	0.0143383
AT3G01750	-1.19068	0.0209297
AT3G01810	-1.27831	0.0164793
AT3G01820	1.91144	0.00453163
AT3G01860	-1.66745	0.0334966
AT3G01960	1.37516	0.0419964
AT3G02110	-1.61888	0.0218611
AT3G02120	-6.41671	0.00216342
AT3G02140	-1.9169	0.00449907
AT3G02170	-2.67231	0.00355326
AT3G02230	-1.33967	0.00260884
AT3G02410	-2.47051	0.00365667
AT3G02480	8.04559	0.00876469
AT3G02493	-2.25981	0.0382689
AT3G02570	-1.56444	0.00195954
AT3G02620	3.13043	0.00491933
AT3G02640	-5.18268	0.00339872
AT3G02820	-2.75239	0.00450696
AT3G02832	2.48299	0.0459625
AT3G02880	-1.55691	0.0152794
AT3G02930	-1.13802	0.0425961
AT3G02990	1.08118	0.0146844
AT3G03000	-1.16832	0.0339281
AT3G03130	-3.46513	0.0200664
AT3G03170	3.52991	0.00175707
AT3G03230	4.53562	0.00253273
AT3G03240	3.58686	0.0369347
AT3G03270	1.68052	0.00950574
AT3G03310	2.12156	0.00699597
AT3G03341	3.80259	0.00459954
AT3G03440	2.89636	0.00786474
AT3G03470	2.43819	0.00765855
AT3G03480	4.47367	0.0103443
AT3G03520	1.11984	0.0298072
AT3G03530	3.08679	0.0389914
AT3G03535	3.37687	0.0151492
AT3G03640	1.20452	0.00460294
AT3G03830	-2.69557	0.0247031
AT3G03840	-3.21878	0.0283227
AT3G03900	2.13524	0.0403489
AT3G03915	1.66948	0.0070978
AT3G04010	1.4196	0.00884842
AT3G04020	1.82075	0.0389914
AT3G04040	2.64999	0.00614036
AT3G04060	1.35943	0.0283936
AT3G04065	3.32484	0.0431254
AT3G04070	2.33907	0.0228791
AT3G04130	1.3975	0.0460849
AT3G04210	-2.73595	0.0029231
AT3G04240	1.28664	0.0229382
AT3G04290	-4.71999	0.00162334
AT3G04300	-3.11877	0.0203588
AT3G04530	4.89556	0.00443747
AT3G04630	-1.10818	0.0282725
AT3G04710	1.21086	0.0210464
AT3G04860	-1.80784	0.015509
AT3G04910	-1.40447	0.018629
AT3G05030	1.79328	0.00315646
AT3G05105	1.91792	0.00834062
AT3G05152	-3.13924	0.0199235
AT3G05260	2.84597	0.0370864
AT3G05380	1.37191	0.00361442
AT3G05400	1.95088	0.0114398
AT3G05470	-2.55912	0.0171752
AT3G05490	-1.60498	0.00126554
AT3G05600	-4.26013	0.00705043
AT3G05625	-1.05532	0.0179277
AT3G05630	1.78876	0.00760889
AT3G05640	1.31929	0.00121313
AT3G05650	1.73208	0.00926398
AT3G05660	1.26889	0.0160519
AT3G05727	-2.70396	0.00695915
AT3G05730	-7.73458	0.00280189
AT3G05740	-2.90005	0.00245371
AT3G05800	-2.1011	0.00195083
AT3G05858	-2.84154	0.00227681
AT3G05905	2.782	0.0296894
AT3G05910	-1.6112	0.00948312
AT3G05932	3.79829	0.00597189
AT3G05937	1.13249	0.0173643
AT3G05980	-1.73037	0.0146791
AT3G06020	-3.44333	0.0233566
AT3G06045	2.31921	0.0157303
AT3G06060	-1.1714	0.0056226
AT3G06070	-4.10813	0.00364046
AT3G06080	-1.98969	0.0308453
AT3G06120	-2.56075	0.0423633
AT3G06130	-1.68993	0.0438606
AT3G06140	-3.32065	0.0156477
AT3G06145	-3.2934	0.0150863
AT3G06150	-1.2279	0.00113611
AT3G06345	1.03199	0.00600486
AT3G06520	1.94025	0.0258467
AT3G06740	-1.61687	0.0287648
AT3G06750	-3.08644	0.00410615
AT3G06770	-4.04959	0.00372053
AT3G06778	-2.69239	0.00340291
AT3G06790	1.02101	0.0436406
AT3G06810	1.17151	0.00763748
AT3G06868	-1.92965	0.00443246
AT3G06880	-5.42451	0.00206485
AT3G07000	-3.07929	0.0214383
AT3G07010	-3.91743	0.00103766
AT3G07195	-3.35409	0.0119603
AT3G07270	-1.09827	0.00459954
AT3G07320	-4.17489	0.00154742
AT3G07340	-1.78689	0.00851747
AT3G07360	1.20265	0.0253343
AT3G07410	1.00114	0.0109446
AT3G07460	-2.37852	0.0041316
AT3G07470	-1.96143	0.000964788
AT3G07540	-4.7662	0.023577
AT3G07650	-1.24232	0.0061688
AT3G07675	1.64827	0.0156629
AT3G07730	1.47987	0.0198322
AT3G07750	1.17512	0.00834062
AT3G07970	2.4405	0.0386516
AT3G08455	-2.31017	0.0197316
AT3G08590	1.34919	0.00944966
AT3G08600	-2.14265	0.00191707
AT3G08680	-1.56641	0.00453664
AT3G08690	1.19803	0.0218753
AT3G08770	-3.73406	0.0070978
AT3G08860	2.12552	0.00540731
AT3G08870	2.0652	0.0233573
AT3G08920	-1.49945	0.0144589
AT3G09035	-2.05674	0.0141254
AT3G09070	-1.48234	0.0479418
AT3G09080	-2.97144	0.0104569
AT3G09185	2.56659	0.00434765
AT3G09250	1.75766	0.0020724
AT3G09260	-1.75298	0.0305687
AT3G09390	1.47363	0.00980986
AT3G09450	3.42072	0.0355614
AT3G09580	-1.33765	0.0107682
AT3G09600	3.19081	0.00147828
AT3G09640	3.33114	0.02536
AT3G09745	4.49667	0.00130401
AT3G09770	1.07518	0.00684963
AT3G09910	2.7806	0.0195753
AT3G09940	-3.6013	0.0492237
AT3G10060	-1.78054	0.0011371
AT3G10080	-2.5988	0.0479152
AT3G10130	1.00312	0.00876458
AT3G10190	1.4992	0.0114749
AT3G10250	1.11329	0.0134624
AT3G10310	-2.62582	0.0255864
AT3G10320	4.25787	0.00765855
AT3G10410	1.11306	0.00962169
AT3G10450	1.67063	0.00445141
AT3G10520	-1.61136	0.0138667
AT3G10570	-1.82324	0.0177247
AT3G10605	-2.11055	0.0298718
AT3G10610	-1.23055	0.021795
AT3G10720	-3.45361	0.00542881
AT3G10740	1.19316	0.0361724
AT3G10880	-1.88347	0.0468042
AT3G10910	1.6377	0.0259049
AT3G10930	-1.58329	0.00663009
AT3G10985	-1.10881	0.0452998
AT3G11020	2.62789	0.0244176
AT3G11050	3.22381	0.0482888
AT3G11080	1.78244	0.0399222
AT3G11110	-3.27461	0.00733265
AT3G11170	-1.87735	0.00170697
AT3G11402	-2.50322	0.0067869
AT3G11410	3.15142	0.00103766
AT3G11420	1.46347	0.00573623
AT3G11520	-3.03779	0.035939
AT3G11580	1.22633	0.0419432
AT3G11630	-2.18135	0.00231888
AT3G11670	2.0605	0.00430328
AT3G11690	1.3784	0.0067869
AT3G11700	-2.05645	0.000692563
AT3G11820	-1.35098	0.00416598
AT3G12090	1.35118	0.038
AT3G12110	-3.19036	0.0198056
AT3G12145	-3.67509	0.0206729
AT3G12150	-2.38895	0.00689678
AT3G12170	-1.45826	0.0271996
AT3G12520	1.57233	0.00367914
AT3G12580	5.19817	0.00643568
AT3G12600	-1.32317	0.0143781
AT3G12610	-4.15981	0.00227527
AT3G12700	-2.73429	0.00333118
AT3G12750	-1.64729	0.0196747
AT3G12775	1.66948	0.0070978
AT3G12780	-1.20617	0.0112209
AT3G12870	-5.55442	0.00447677
AT3G12890	-3.26838	0.0018591
AT3G12920	-2.17283	0.00101641
AT3G12955	4.10145	0.00971338
AT3G12960	7.77765	0.00828119
AT3G13000	-1.73178	0.00828119
AT3G13040	1.49387	0.00105768
AT3G13120	-1.51152	0.00279276
AT3G13130	5.58497	0.0026238
AT3G13437	-2.01858	0.0334788
AT3G13450	-1.13443	0.0299325
AT3G13520	-2.22946	0.00184252
AT3G13530	-1.027	0.0482165
AT3G13560	-1.64743	0.00416598
AT3G13672	3.87063	0.000964788
AT3G13690	-1.21012	0.040269
AT3G13750	-4.74737	0.0203114
AT3G13790	-3.11028	0.0391515
AT3G13880	2.03408	0.0356809
AT3G13910	1.03385	0.0106779
AT3G13940	1.51507	0.00460535
AT3G14060	2.38806	0.00582438
AT3G14067	1.05361	0.0409247
AT3G14070	1.75711	0.0412141
AT3G14130	1.34102	0.0177669
AT3G14190	-1.01852	0.00889307
AT3G14240	-1.42242	0.00628369
AT3G14280	2.49841	0.00447079
AT3G14310	-2.45294	0.00195954
AT3G14360	4.78752	0.00384161
AT3G14395	1.47965	0.016217
AT3G14440	1.60089	0.00561719
AT3G14560	2.30253	0.00261354
AT3G14580	3.18243	0.0178328
AT3G14590	2.35686	0.0135248
AT3G14595	1.39233	0.00138486
AT3G14660	1.01297	0.0187877
AT3G14690	1.13373	0.0135744
AT3G14720	1.05665	0.0108857
AT3G14740	-2.99648	0.0261664
AT3G14760	-2.10863	0.025725
AT3G14790	-1.12766	0.02644
AT3G14810	1.39035	0.00500044
AT3G14840	-3.09986	0.0325905
AT3G14850	-2.954	0.0190444
AT3G14870	-1.88017	0.0299698
AT3G14880	2.8639	0.0146844
AT3G14930	-1.54337	0.00250557
AT3G14950	-2.78101	0.00353096
AT3G15060	-1.58315	0.00629664
AT3G15190	-1.25859	0.00542881
AT3G15240	2.87004	0.00895797
AT3G15280	3.69418	0.0120889
AT3G15340	2.43535	0.0187632
AT3G15350	2.1394	0.0074822
AT3G15352	1.05862	0.023614
AT3G15356	-3.31772	0.00460535
AT3G15357	3.91819	0.0374956
AT3G15450	-2.21855	0.0185467
AT3G15460	1.83185	0.0152012
AT3G15520	-2.31319	0.00140573
AT3G15530	-1.18814	0.00140135
AT3G15534	2.01894	0.0109619
AT3G15540	-3.2879	0.00184382
AT3G15590	1.3741	0.0125007
AT3G15620	-1.4991	0.0150104
AT3G15630	-4.24433	0.00279276
AT3G15640	-1.32189	0.00272729
AT3G15680	-2.01664	0.0130013
AT3G15770	-1.57753	0.0323803
AT3G15780	2.33453	0.0018591
AT3G15790	1.85616	0.00593126
AT3G15850	-1.99071	0.00537454
AT3G15990	1.87903	0.0282725
AT3G16030	1.58762	0.0136536
AT3G16140	-1.33065	0.0259049
AT3G16170	1.08139	0.0187958
AT3G16180	-2.36908	0.00570002
AT3G16190	1.26211	0.00761716
AT3G16240	-4.6217	0.0021008
AT3G16250	-2.56596	0.00559313
AT3G16350	-1.01107	0.0354789
AT3G16360	1.54904	0.0143281
AT3G16370	-2.12155	0.00892601
AT3G16400	1.95406	0.00126554
AT3G16410	1.03929	0.0436027
[truncated: 2,153 more rows]
