# Supplementary material
Source: Research Square preprint supplement (doi:10.21203/rs.3.rs-8969427/v1)
Supplement: Supplementary file 4 [file 9f07c91196e708d546b9b69e.xlsx]

## Sheet: Legend
		Supplementary Table S5: Cluster analysis of differentially regulated genes (DEGs) between WT, alkbh10b, and OX-1 under drought vs. control conditions.
		DEGs (drought vs. control) that differed between WT, alkbh10b and OX-1 were determined by ΔΔLog2FC=(Log2FC WT - Log2FC 10b) - (Log2FC WT - Log2FC OX-1). Genes with unchanged expression compared to control conditions (UC) were considered as Log2FC= 0 for the calculations. Genes are classified into 4 clusters based on the regulation between different genotypes listed with their functional annotatio…

## Sheet: ΔΔLog2FC
GeneID	Log2FC WT	Log2FC 10b-1	Log2FC OX-1
AT3G60140	6.681	UC	7.40675
AT5G04190	-3.49344	-6.16749	UC
AT1G74670	-4.63407	-5.79174	UC
AT3G27690	-4.46581	-5.75034	UC
AT3G63110	-2.96685	-5.64333	UC
AT2G18300	-4.40947	-5.51729	UC
AT1G05675	-4.14978	-5.48381	UC
AT5G03615	-3.88652	-5.33293	UC
AT5G16410	-2.80783	-5.3186	UC
AT3G45860	-4.01715	-5.29542	UC
AT5G45820	-3.01142	-5.2947	UC
AT1G10640	-3.58781	-5.17105	UC
AT3G63088	-5.34089	-5.14095	UC
AT2G01890	3.42028	UC	5.10286
AT1G16630	-3.8221	-5.05854	UC
AT1G13260	-3.94942	-4.99843	UC
AT1G13520	UC	UC	4.96214
AT1G05510	2.70991	UC	4.79238
AT1G65845	-3.89201	-4.78123	UC
AT1G10460	-3.40274	-4.76325	UC
AT3G48970	-5.28802	-4.75606	UC
AT1G28650	UC	UC	4.7266
AT5G15265	-4.17383	-4.663	UC
AT2G44240	UC	-4.61963	UC
AT4G08910	UC	-4.59813	UC
AT2G26560	-4.32844	-4.59001	UC
AT5G59305	-4.55602	-4.58365	UC
AT3G42800	-3.53504	-4.5723	UC
AT2G40750	-3.88917	-4.52317	UC
AT5G19110	UC	-4.49032	UC
AT1G73260	UC	UC	4.48497
AT1G25510	-2.74113	-4.4663	UC
AT5G35525	UC	-4.44639	UC
AT3G60840	-2.73988	-4.44639	UC
AT5G46220	-2.74259	-4.35556	UC
AT5G55520	-4.80776	-4.35119	UC
AT2G37380	-1.72316	-4.33017	UC
AT1G15840	UC	UC	4.32248
AT4G19820	-4.02601	-4.31844	UC
AT4G30290	UC	-4.31514	UC
AT3G43850	-2.34711	-4.31492	UC
AT5G03130	-3.75189	-4.3142	UC
AT2G23240	3.67292	UC	4.27728
AT4G33666	-3.20112	-4.26466	UC
AT3G49960	-3.36928	-4.24128	UC
AT1G01190	-3.28806	-4.23829	UC
AT1G32770	3.85995	UC	4.22046
AT4G24265	-4.2203	-4.21735	UC
AT3G22540	-3.03806	-4.20406	UC
AT2G42800	-3.92738	-4.1903	UC
AT2G18650	-2.00664	-4.15696	UC
AT4G23520	UC	UC	4.13585
AT5G13130	UC	-4.12368	UC
AT3G53680	UC	-4.06579	UC
AT4G28680	-1.86247	-4.02951	UC
AT3G13404	UC	-4.02551	UC
AT1G68800	UC	-4.01091	UC
AT4G29270	-3.65332	-4.00275	UC
AT4G37700	-4.19316	-3.97391	UC
AT1G63910	UC	UC	3.97375
AT5G60490	UC	-3.97215	UC
AT5G49690	UC	UC	3.96871
AT4G35620	-3.98561	-3.94253	UC
AT2G17740	UC	-3.93464	UC
AT3G06100	-4.58934	-3.92699	UC
AT1G72670	UC	-3.91922	UC
AT1G52190	-2.99959	-3.91634	UC
AT1G78090	UC	-3.89071	UC
AT1G22900	UC	-3.87876	UC
AT5G14730	-4.2428	-3.87774	UC
AT1G79770	-3.74298	-3.86922	UC
AT5G05510	-3.55282	-3.86652	UC
AT2G03850	3.03595	UC	3.86464
AT5G16023	UC	-3.85826	UC
AT1G01900	-3.60174	-3.85622	UC
AT3G50010	-3.70806	-3.85486	UC
AT2G41510	UC	-3.85038	UC
AT5G50335	-4.23737	-3.84956	UC
AT4G11470	-3.71295	-3.84497	UC
AT4G18260	UC	-3.79801	UC
AT1G20610	-2.1818	-3.7905	UC
AT2G14560	-5.85254	-3.78276	UC
AT5G49630	-3.32456	-3.78175	UC
AT2G31930	UC	UC	3.77446
AT1G66465	UC	-3.75805	UC
AT1G78430	-3.97536	-3.75774	UC
AT3G10280	UC	-3.74673	UC
AT4G10290	UC	-3.74186	UC
AT1G55010	-3.43363	-3.7241	UC
AT4G26960	-2.18388	-3.72235	UC
AT1G65330	-3.80245	-3.70978	UC
AT1G23350	UC	-3.70474	UC
AT4G09420	-2.00358	-3.70398	UC
AT4G00820	UC	-3.69743	UC
AT3G47340	-2.6629	-3.69643	UC
AT1G31310	UC	-3.69447	UC
AT4G35770	-2.55586	-3.69225	UC
AT5G51600	-2.21582	-3.68054	UC
AT2G20880	UC	-3.67913	UC
AT5G20870	UC	-3.67904	UC
AT1G47840	-3.62072	-3.67646	UC
AT1G60987	UC	UC	3.67471
AT1G52920	3.11966	UC	3.67383
AT1G18835	UC	-3.64249	UC
AT2G30424	-2.95378	-3.64041	UC
AT4G08300	-2.32782	-3.63766	UC
AT5G37940	-7.42124	-3.6341	UC
AT3G61920	-4.79161	-3.63345	UC
AT2G46780	-3.32948	-3.62939	UC
AT2G20515	-1.85731	-3.62555	UC
AT1G27045	-4.52946	-3.62245	UC
AT2G38500	UC	-3.6178	UC
AT2G28085	UC	-3.61701	UC
AT1G51820	-2.71117	-3.61436	UC
AT5G46871	-2.03393	-3.60641	UC
AT5G62920	-3.42785	-3.60003	UC
AT4G10160	UC	-3.59886	UC
AT3G46700	UC	UC	3.58735
AT4G23210	UC	-3.56778	UC
AT5G60880	UC	-3.5671	UC
AT5G16920	UC	UC	3.56598
AT1G02630	-2.94445	-3.56367	UC
AT3G53010	-2.79589	-3.56102	UC
AT5G28610	UC	-3.55716	UC
AT1G02900	UC	-3.53679	UC
AT2G31945	UC	UC	3.53005
AT1G10340	-3.58804	-3.51602	UC
AT4G38062	-4.0375	-3.50973	UC
AT5G45840	-1.49392	-3.50531	UC
AT5G36925	-4.71169	-6.29921	-2.79569
AT1G61810	UC	UC	3.4985
AT5G12970	UC	-3.47046	UC
AT5G07570	-2.79549	-3.46585	UC
AT3G25930	UC	UC	3.46534
AT3G51230	UC	-3.46307	UC
AT3G62640	UC	UC	3.45443
AT4G10630	UC	-3.45311	UC
AT3G44769	UC	-3.45022	UC
AT1G53690	-3.82795	-3.42855	UC
AT4G24780	-2.27522	-3.42502	UC
AT3G09450	4.32758	UC	3.42072
AT4G13690	-3.16573	-3.41546	UC
AT3G20395	-2.93759	-3.40463	UC
AT5G66640	UC	-3.40374	UC
AT3G63093	UC	UC	3.40039
AT3G61840	-3.13611	-3.36842	UC
AT1G10770	-3.97154	-3.36645	UC
AT3G13600	UC	-3.36066	UC
AT5G26670	-4.85871	-5.4543	-2.09496
AT4G34800	UC	-3.35236	UC
AT3G09095	UC	-3.34831	UC
AT4G39675	UC	-3.34702	UC
AT2G35710	UC	-3.34375	UC
AT1G78120	-2.89614	-3.33391	UC
AT1G01840	UC	UC	3.32493
AT4G04460	UC	UC	3.32395
AT5G16080	UC	-3.32293	UC
AT5G11410	UC	-3.32152	UC
AT1G07120	UC	UC	3.32126
AT5G20635	-4.07572	-3.32065	UC
AT4G18501	UC	-3.31897	UC
AT4G30230	-3.70806	-3.31686	UC
AT4G20230	UC	-3.31054	UC
AT3G06840	-3.17085	-3.30104	UC
AT2G19090	UC	-3.29853	UC
AT5G10250	-3.31597	-3.29853	UC
AT4G18253	-4.89531	-3.27993	UC
AT5G36920	UC	-3.27971	UC
AT2G05070	-2.09861	-3.27856	UC
AT1G02810	-2.61465	-3.27625	UC
AT1G75450	-2.35339	-3.27584	UC
AT1G08390	UC	-3.27297	UC
AT2G42885	UC	-3.26842	UC
AT3G53040	2.72761	UC	3.2546
AT1G08080	UC	UC	3.25233
AT1G52245	UC	-3.24951	UC
AT5G07810	UC	-3.24641	UC
AT5G04180	UC	-3.24494	UC
AT5G56960	-3.59539	-3.24399	UC
AT1G78530	-3.22543	-3.2425	UC
AT2G26040	UC	-3.22962	UC
AT2G23030	3.55414	UC	3.22188
AT1G08160	-2.95535	-3.22141	UC
AT1G51780	-2.4932	-3.21672	UC
AT4G24250	UC	-3.21456	UC
AT3G48510	UC	UC	3.21156
AT4G20430	-1.79516	-3.20672	UC
AT1G66100	-9.15213	-9.75066	-6.55678
AT2G34010	-2.74526	-3.19178	UC
AT3G51590	UC	UC	3.18836
AT1G06350	-3.73176	-3.18773	UC
AT4G02850	-4.08682	-3.18654	UC
AT5G24290	UC	-3.18405	UC
AT3G14580	UC	UC	3.18243
AT4G28395	UC	UC	3.17802
AT2G18180	UC	-3.17496	UC
AT5G16030	-1.90042	-3.17418	UC
AT1G54820	-3.23013	-3.17361	UC
AT3G03850	-3.88789	-3.15095	UC
AT1G11500	UC	-3.1502	UC
AT1G11112	UC	-3.14978	UC
AT1G66190	-2.3976	-3.14792	UC
AT5G25810	-1.59981	-3.13339	UC
AT4G32810	UC	UC	3.12717
AT4G26530	-2.61673	-3.12041	UC
AT5G05890	-1.84357	-3.11968	UC
AT5G67460	-3.13328	-3.11801	UC
AT3G05900	-1.54811	-3.1147	UC
AT1G59670	UC	UC	3.11135
AT4G11460	UC	-3.10521	UC
AT5G05965	1.95372	UC	3.1012
AT2G03360	UC	UC	3.10009
AT4G12830	-3.26815	-3.09544	UC
AT5G60140	UC	UC	3.09303
AT3G03530	2.47914	UC	3.08679
AT3G27440	2.97335	UC	3.08594
AT1G02813	UC	UC	3.0697
AT1G17700	-2.80665	-3.06909	UC
AT1G68240	UC	-3.06884	UC
AT1G67180	-2.95565	-3.06122	UC
AT1G53920	-3.58282	-3.04622	UC
AT3G09780	-3.17923	-3.03989	UC
AT2G33750	UC	-3.03954	UC
AT5G53980	-3.36928	-3.03649	UC
AT3G60972	UC	UC	3.03485
AT3G28917	UC	UC	3.0309
AT1G16950	UC	UC	3.01383
AT2G46830	2.42054	UC	3.00208
AT5G56870	UC	-5.9099	-2.91553
AT5G10770	-1.78109	-2.99271	UC
AT1G70690	UC	-2.99212	UC
AT3G06990	UC	-2.99006	UC
AT1G12010	UC	-2.9877	UC
AT3G23370	UC	-2.98702	UC
AT5G23400	-3.52456	-2.98694	UC
AT2G45040	UC	UC	2.98617
AT1G64625	UC	-2.98568	UC
AT2G23300	UC	-2.98038	UC
AT2G22810	-1.18493	-2.97982	UC
AT3G57157	UC	-2.97764	UC
AT2G21540	-2.12273	-2.96959	UC
AT5G42930	3.19466	UC	2.96914
AT5G06800	UC	-2.96869	UC
AT5G40180	UC	-2.9645	UC
AT1G27990	UC	UC	2.96353
AT4G30610	-1.69018	-2.95391	UC
AT2G21910	UC	-2.9536	UC
AT4G09240	UC	-2.9536	UC
AT4G34930	UC	-2.94615	UC
AT5G06470	-3.12186	-2.94488	UC
AT4G28500	UC	-2.94221	UC
AT1G26330	-2.72381	-2.93624	UC
AT2G26180	-2.4765	-2.9358	UC
AT1G22220	UC	-2.93513	UC
AT5G51480	UC	-2.93502	UC
AT2G05100	-1.81527	-2.93309	UC
AT3G30530	UC	-2.93249	UC
AT2G18060	UC	-2.9312	UC
AT5G60660	UC	-2.93094	UC
AT2G27313	UC	-2.92803	UC
AT3G01070	-1.91112	-2.92639	UC
AT2G20700	UC	-2.92287	UC
AT1G06713	UC	-2.92113	UC
AT2G40370	UC	UC	2.91666
AT5G41060	-2.77873	-2.9135	UC
AT5G14100	UC	-2.91305	UC
AT4G15830	-3.29853	-2.9111	UC
AT3G21710	3.27978	UC	2.91105
AT3G15440	UC	-2.9093	UC
AT5G09805	-1.61477	-2.90695	UC
AT4G29340	UC	UC	2.90335
AT4G11000	-3.2177	-2.90326	UC
AT1G65484	-3.11919	-2.90313	UC
AT5G27550	-2.40666	-2.89909	UC
AT3G55485	UC	UC	2.89874
AT5G45000	UC	-2.892	UC
AT5G49360	-1.81281	-2.88944	UC
AT5G18050	-2.62942	-2.88011	UC
AT3G18010	UC	-2.87832	UC
AT3G03265	UC	-2.87414	UC
AT5G44578	-3.04643	-2.87408	UC
AT5G43650	UC	UC	2.87325
AT3G15240	UC	UC	2.87004
AT1G23760	UC	-2.86128	UC
AT1G27020	-5.13852	-7.7541	-4.89295
AT1G02670	UC	-2.8607	UC
AT1G29280	UC	-2.85889	UC
AT3G43190	-1.66927	-2.85854	UC
AT5G07510	UC	UC	2.85787
AT2G29890	-3.0798	-2.85766	UC
ATMG00860	UC	UC	2.8523
AT4G30090	UC	-2.85106	UC
AT1G03660	-2.71073	-2.85053	UC
AT5G40510	2.68375	UC	2.85031
AT4G04445	UC	UC	2.84946
AT2G27080	UC	-2.84906	UC
AT3G05260	UC	UC	2.84597
AT4G37240	-7.48655	-8.35472	-5.51379
AT5G22490	UC	-2.84034	UC
AT1G53730	-4.15525	-2.83139	UC
AT2G08945	-1.99718	-2.82803	UC
AT3G62380	UC	UC	2.82688
AT1G18550	-1.9261	-2.82553	UC
AT3G51325	UC	UC	2.82227
AT5G50060	UC	-2.82071	UC
AT5G21030	UC	UC	2.81759
AT3G57160	UC	-2.81735	UC
AT4G12890	UC	-2.8146	UC
AT4G32890	UC	-2.80883	UC
AT1G06100	-3.63109	-2.80757	UC
AT4G23140	-1.70627	-2.80388	UC
AT1G77870	UC	-2.80308	UC
AT4G25420	-2.44059	-4.06741	-1.26709
AT4G13710	UC	-2.79974	UC
AT3G19850	-1.51856	-2.79104	UC
AT1G66090	-2.67947	-2.7892	UC
AT5G38930	UC	-2.78839	UC
AT4G36230	-2.92585	-2.7878	UC
AT5G51160	UC	UC	2.78522
AT3G05905	UC	UC	2.782
AT4G17905	UC	-2.77992	UC
AT5G13060	-3.19426	-2.77782	UC
AT4G18540	-3.3968	-2.77645	UC
AT4G15430	UC	-2.77265	UC
AT4G28703	UC	UC	2.77125
AT3G60550	-3.49132	-2.77006	UC
AT5G39240	-1.7672	-2.76367	UC
AT2G40610	-6.71844	-7.62581	-4.86815
AT4G13370	-3.04825	-2.7482	UC
AT1G13420	UC	-2.74746	UC
AT2G29130	UC	UC	2.74628
AT4G11210	-3.59155	-2.7462	UC
AT4G13860	UC	UC	2.74109
AT3G20470	-2.36901	-2.73965	UC
AT4G14130	UC	-2.73766	UC
AT1G70710	-3.01095	-2.73689	UC
AT3G60990	UC	-2.73688	UC
AT2G07714	UC	UC	2.73459
AT3G19200	UC	-2.72753	UC
AT1G68330	-3.65952	-4.80621	-2.09381
AT1G75050	UC	-2.70867	UC
AT2G33175	UC	-2.70867	UC
AT1G11230	UC	UC	2.70781
AT5G24105	-4.25401	-5.28003	-2.57257
AT5G12300	UC	-2.70691	UC
AT5G22870	UC	-2.70624	UC
AT4G22900	-2.71818	-2.70558	UC
AT2G01390	UC	UC	2.70473
AT1G73550	UC	-2.70346	UC
AT2G22510	2.30524	UC	2.70286
AT1G69080	-1.49523	-2.70082	UC
AT1G15175	-3.39706	-2.69922	UC
AT4G18470	UC	-2.69894	UC
AT5G63087	-3.22567	-2.69889	UC
AT1G54010	-2.86946	-5.58795	-2.88927
AT1G63055	3.81991	UC	2.69712
AT1G28010	-3.67741	-5.55532	-2.85899
AT3G26470	-1.24795	-2.696	UC
AT2G01950	-1.95361	-2.69551	UC
AT5G42180	UC	-2.69457	UC
AT5G03640	2.52413	UC	2.69323
AT4G23060	-1.97629	-2.69314	UC
AT5G51850	-3.07917	-5.34801	-2.65804
AT3G20200	UC	-2.68916	UC
AT5G65510	UC	-2.68828	UC
AT2G39375	UC	UC	2.68716
AT4G06265	UC	-2.6864	UC
AT1G78460	-2.01273	-2.68602	UC
AT1G19940	UC	-2.67847	UC
AT5G59080	-2.79652	-2.67387	UC
AT1G30040	UC	-2.67222	UC
AT1G35910	UC	-2.67195	UC
AT2G32750	UC	-2.67116	UC
AT3G51060	UC	-2.67116	UC
AT5G49730	-2.14695	-2.67063	UC
AT3G20350	-1.50345	-2.66809	UC
AT4G30170	UC	-2.66797	UC
AT1G01390	-4.28565	-4.4916	-1.8247
AT2G37925	-3.07662	-2.66657	UC
AT2G22330	-1.66077	-2.66436	UC
AT5G16570	-1.8121	-2.66107	UC
AT1G77855	UC	-2.65914	UC
AT5G55680	-3.4411	-2.64814	UC
AT5G14470	UC	-2.64733	UC
AT2G07702	UC	UC	2.64603
AT5G51440	UC	UC	2.64504
AT5G03995	-2.81497	-2.64373	UC
AT3G28040	-2.06482	-2.64258	UC
AT5G27360	-1.30525	-2.64052	UC
AT3G28860	-2.09855	-2.63826	UC
AT5G48940	UC	-2.63541	UC
AT3G23930	UC	UC	2.63388
AT5G24770	UC	UC	2.63186
AT2G44578	UC	-2.63161	UC
AT4G10310	UC	-2.62837	UC
AT3G11020	UC	UC	2.62789
AT1G11450	-2.64811	-2.62625	UC
AT5G10570	-2.49885	-2.62598	UC
AT3G61510	-4.10351	-2.62302	UC
AT1G77010	UC	UC	2.62187
AT5G62998	UC	UC	2.62043
AT1G04760	-2.67651	-2.62032	UC
AT5G14750	UC	UC	2.61667
AT1G61700	2.4723	UC	2.61619
AT1G10800	UC	UC	2.61612
AT5G57780	-2.70736	-2.61498	UC
AT2G31985	3.05233	UC	2.6106
AT4G06695	UC	UC	2.60825
AT4G03925	UC	UC	2.60727
AT3G55900	UC	UC	2.6047
AT1G03170	UC	-2.60421	UC
AT3G50270	-1.50763	-2.60348	UC
AT5G04065	3.01394	UC	2.60035
AT2G28680	UC	UC	2.60035
AT5G37950	-3.64314	-2.59471	UC
AT5G01530	-1.99292	-2.59299	UC
AT2G01905	UC	-2.59182	UC
AT2G25130	UC	-2.59182	UC
AT1G03130	-1.56728	-2.58883	UC
AT1G78970	-2.44583	-2.588	UC
AT3G19550	-2.24598	-2.58548	UC
AT5G06720	UC	-2.58455	UC
AT1G32350	UC	3.90701	6.49107
AT1G49920	-3.05755	-2.5834	UC
AT4G05180	-1.76988	-2.5802	UC
AT4G26830	UC	-2.57952	UC
AT5G48690	UC	-2.57755	UC
AT2G30395	UC	-2.57452	UC
AT2G39560	UC	-2.57379	UC
AT5G09195	2.10514	UC	2.57319
AT2G02380	UC	UC	2.57256
AT5G05300	-2.99646	-2.57062	UC
AT1G71015	UC	-2.56893	UC
AT3G22790	UC	-2.56686	UC
AT1G06217	UC	UC	2.56659
AT3G09185	UC	UC	2.56659
AT1G02340	-2.51611	-2.56354	UC
AT1G75720	UC	-2.56129	UC
AT1G33340	UC	-2.55793	UC
AT4G29700	-2.56496	-4.26671	-1.7152
AT5G46280	-2.03279	-2.54891	UC
AT4G29690	UC	-2.54661	UC
AT1G66060	UC	-2.5458	UC
AT4G24140	UC	-2.54548	UC
AT1G48315	UC	-2.53949	UC
AT3G44350	UC	-2.53949	UC
AT1G71830	UC	-2.53798	UC
AT5G24420	UC	-2.53662	UC
AT4G14380	-2.76905	-2.53552	UC
AT5G64850	-1.74797	-2.53421	UC
ATCG01270	UC	-2.53367	UC
AT1G17065	UC	-2.53141	UC
AT5G06250	UC	-2.53141	UC
AT4G22790	UC	-2.52543	UC
AT1G80760	-1.50937	-2.52376	UC
AT3G50390	UC	UC	2.52319
AT2G47160	-1.42422	-2.52149	UC
AT1G05450	4.04188	UC	2.51707
AT2G27430	UC	-2.50797	UC
AT5G52100	UC	-2.5065	UC
AT3G59880	-2.4525	-2.50455	UC
AT1G09932	-3.51208	-2.50009	UC
AT4G18840	UC	UC	2.49454
AT3G24065	UC	-2.49046	UC
AT3G48540	UC	-2.49036	UC
AT5G37478	UC	UC	2.48982
AT1G14940	UC	UC	2.48845
AT3G24420	-2.68791	-2.48596	UC
AT5G36970	UC	UC	2.4851
AT5G15150	UC	-2.48205	UC
ATMG00630	UC	UC	2.47764
AT4G00400	-4.77371	-6.43081	-3.95389
AT4G09755	UC	-2.47104	UC
AT3G56230	UC	-2.46739	UC
AT1G01453	UC	UC	2.46608
ATMG00440	UC	UC	2.46491
ATMG01140	UC	UC	2.46491
AT4G04830	-2.22287	-3.77041	-1.30676
AT3G54830	-5.25186	-6.60461	-4.14136
AT5G67390	-1.95918	-2.46083	UC
AT3G23880	-1.91193	-3.66519	-1.20677
AT1G53163	-2.49318	-2.45741	UC
AT5G07455	UC	UC	2.45349
AT2G02020	UC	-2.4522	UC
AT1G50900	UC	-2.45179	UC
AT3G49340	UC	UC	2.45093
AT2G05695	3.31597	UC	2.45036
AT2G44380	UC	-2.44925	UC
AT2G47520	UC	-2.44915	UC
AT3G51930	UC	-2.44601	UC
AT3G05932	UC	1.35231	3.79829
AT5G22930	-3.73987	-2.44373	UC
AT2G09205	UC	-2.44308	UC
AT3G45730	-2.00631	-2.44237	UC
AT1G71866	UC	-2.44077	UC
AT4G08835	UC	UC	2.43752
AT3G26960	UC	-2.43696	UC
AT3G15340	1.87951	UC	2.43535
AT1G06170	UC	-2.43443	UC
AT2G46770	UC	-2.43443	UC
AT1G03020	UC	-2.42893	UC
AT2G34080	UC	UC	2.42829
AT1G78440	-1.94288	-2.42709	UC
AT4G23882	-2.24781	-2.42437	UC
AT4G38530	UC	UC	2.42348
AT3G55500	-1.70604	-2.42327	UC
AT2G25297	-2.25582	-2.42171	UC
AT2G16440	-2.2365	-2.41882	UC
AT5G51795	-1.90282	-2.4127	UC
AT3G24000	UC	UC	2.41237
AT3G03325	UC	-2.41053	UC
AT2G44580	-2.83681	-2.41004	UC
AT3G57440	UC	-2.40971	UC
AT4G23340	-2.62474	-2.40741	UC
AT3G60650	UC	-2.406	UC
AT2G18730	-1.75664	-2.40327	UC
AT1G13410	UC	UC	2.39963
AT1G34355	UC	-2.39364	UC
AT1G04020	-2.8391	-2.39329	UC
AT5G59680	-2.82754	-4.43705	-2.04966
AT3G18070	UC	-2.3858	UC
AT1G58190	UC	-2.38523	UC
AT4G15670	-1.84119	-2.38482	UC
AT5G54530	-2.20123	-2.38481	UC
AT5G25460	-2.06393	-2.38292	UC
AT4G16880	-3.25407	-3.768	-1.38655
AT4G21760	UC	-2.38035	UC
AT4G18250	-3.74186	-2.37747	UC
AT1G78770	UC	-2.37665	UC
AT3G07635	-1.10655	-2.37306	UC
AT2G30830	UC	-2.37223	UC
AT1G32583	UC	UC	2.37096
AT5G19260	-2.0478	-2.37003	UC
AT3G54510	UC	-2.36811	UC
AT1G24570	2.32812	UC	2.36552
AT1G75820	-1.87218	-2.36293	UC
AT4G29610	-4.80613	-6.08295	-3.72062
AT2G46720	-2.21146	-2.36175	UC
AT5G38770	UC	-2.36141	UC
AT1G78370	UC	-2.35955	UC
AT3G52115	UC	-2.35824	UC
AT3G48580	UC	UC	2.35539
AT4G37970	2.03639	UC	2.35471
AT5G11160	-2.0815	-2.3514	UC
AT5G46330	-1.57103	-2.35125	UC
AT5G57130	UC	-2.34697	UC
AT5G59990	UC	-2.34645	UC
AT1G19840	-2.18006	-2.34635	UC
AT3G18900	UC	-2.34424	UC
AT1G22500	UC	-2.3414	UC
AT5G19340	-1.99077	-2.34085	UC
AT1G51520	UC	UC	2.33548
AT2G24430	UC	UC	2.33179
AT1G11730	-3.10916	-2.33138	UC
AT4G21350	UC	UC	2.33038
AT3G05330	-1.97846	-2.32831	UC
AT5G10000	UC	UC	2.32699
AT3G33528	UC	UC	2.32495
AT2G41280	UC	UC	2.32471
AT3G23450	-1.96417	-2.32378	UC
AT1G05820	UC	-2.32329	UC
AT3G19002	UC	UC	2.32042
AT3G54260	-1.87752	-2.31932	UC
AT3G06045	UC	UC	2.31921
AT5G37660	UC	-2.31829	UC
AT3G04850	UC	-2.31763	UC
AT4G16970	-4.98824	-2.31513	UC
AT2G25200	-1.89823	-2.3122	UC
AT5G44260	-1.53793	-2.31191	UC
AT3G09345	UC	-2.31003	UC
AT2G23530	UC	-2.30943	UC
AT4G34420	UC	-2.30943	UC
AT2G31110	-1.13817	-2.30688	UC
AT1G75030	-3.49601	-2.30202	UC
AT5G56530	-2.01368	-2.3016	UC
AT3G01700	UC	-2.30133	UC
AT3G53250	UC	-2.30133	UC
AT5G20820	-4.16858	-5.31158	-3.01206
AT2G09150	UC	UC	2.29914
AT4G34138	UC	-2.29735	UC
AT5G46140	UC	-2.2954	UC
AT5G44306	1.49935	1.27556	3.57022
AT5G09976	-2.55808	-2.29387	UC
AT2G29290	-2.53345	-2.29182	UC
AT2G20980	UC	-2.29164	UC
AT4G07820	UC	-2.29	UC
AT5G39970	UC	-2.29	UC
AT5G51470	UC	-2.29	UC
AT5G66770	-1.7475	-2.28971	UC
AT1G61795	UC	-2.28676	UC
AT4G34900	UC	-2.28499	UC
AT5G49740	-1.75947	-2.2849	UC
AT1G22110	UC	-2.28447	UC
AT3G27730	UC	-2.2809	UC
AT5G02580	-1.75473	-2.28068	UC
AT5G48600	-2.69326	-2.28067	UC
AT3G29670	-2.33196	-2.27566	UC
AT2G35950	3.14132	UC	2.27392
AT3G05140	UC	-2.27172	UC
AT1G68725	UC	-2.26656	UC
AT2G37280	UC	-2.26587	UC
AT2G39700	-2.09722	-2.2646	UC
AT5G12030	3.65201	UC	2.26192
AT5G02150	UC	UC	2.25867
AT2G32990	UC	-2.25515	UC
AT4G10910	-3.38453	-2.25103	UC
AT1G15085	UC	-2.25072	UC
AT5G39350	UC	UC	2.24811
AT2G03200	UC	UC	2.24308
AT3G51340	UC	-2.23808	UC
AT1G52450	UC	UC	2.23763
AT5G51380	-2.91853	-2.23676	UC
AT4G31500	-1.93642	-2.23579	UC
AT5G60200	-1.84826	-2.23484	UC
AT5G49390	UC	-2.23474	UC
AT2G20635	UC	-2.23233	UC
AT5G43420	-1.38722	-2.23153	UC
AT1G69160	-2.00756	-2.22941	UC
AT1G73020	-1.90117	-2.22801	UC
AT1G11670	-3.12799	-2.22661	UC
AT3G23740	UC	-2.22412	UC
AT1G62420	UC	-2.22314	UC
AT1G17600	UC	-2.22225	UC
AT4G22910	-1.7562	-2.22118	UC
AT4G36930	1.14502	UC	2.21868
AT5G06790	UC	-2.21813	UC
AT3G18080	-1.63385	-2.20899	UC
AT3G16280	UC	-2.20747	UC
AT3G21500	UC	UC	2.20411
AT4G28780	-6.03502	-7.07498	-4.87604
AT1G73220	4.84622	3.25065	5.44879
AT5G26230	-2.09475	-2.19812	UC
AT2G05160	UC	-2.19386	UC
AT1G70390	UC	UC	2.19236
AT4G19380	-2.98899	-2.19028	UC
AT2G26120	UC	-2.18927	UC
AT4G36570	-7.08283	-5.31117	-3.1273
AT1G50732	-2.00753	-2.18198	UC
AT1G03010	UC	-2.1781	UC
AT4G25845	UC	UC	2.17807
AT3G21080	-2.90202	-2.17657	UC
AT3G58990	UC	-2.17413	UC
AT5G23830	UC	-2.17243	UC
AT3G52790	UC	UC	2.17018
AT3G47380	-6.32933	-6.26949	-4.10394
AT4G28110	UC	UC	2.16319
AT2G13570	UC	-2.1627	UC
AT2G37950	-4.67051	-5.62421	-3.46175
AT5G43040	UC	-2.16204	UC
AT1G20180	UC	UC	2.16119
AT1G74770	UC	UC	2.16119
AT5G59860	UC	UC	2.16039
AT5G41590	UC	-2.16028	UC
AT5G23210	-4.53188	-5.36673	-3.20832
AT2G21100	UC	UC	2.15804
AT5G55150	UC	UC	2.15775
AT5G56510	UC	UC	2.15775
AT5G59780	1.84639	UC	2.1542
AT5G48540	-2.77839	-2.14733	UC
AT5G25190	-4.99644	-5.3793	-3.23307
AT4G21926	UC	-2.14588	UC
AT5G05340	UC	UC	2.14546
AT2G42388	UC	-2.14485	UC
AT2G28690	UC	-2.14179	UC
AT1G07880	-3.74582	-2.14045	UC
AT1G35830	-2.0488	-2.14013	UC
AT5G15300	UC	UC	2.13888
AT2G36010	UC	-2.13436	UC
AT4G16350	UC	-2.1339	UC
AT5G65800	UC	-2.1339	UC
AT3G07580	UC	-2.13358	UC
AT1G30250	-1.78935	-2.13166	UC
AT2G01610	-2.01224	-2.12636	UC
AT2G25150	UC	-2.12475	UC
AT3G46616	UC	-2.12475	UC
AT1G58290	-1.6963	-2.11508	UC
AT1G62440	-4.21692	-5.06139	-2.94692
AT5G10180	-1.76664	-2.11205	UC
AT3G16920	UC	UC	2.1074
AT1G06520	UC	UC	2.10207
AT2G35910	UC	-2.10188	UC
AT4G27740	-1.68587	-2.09922	UC
AT1G67810	-1.90786	-2.09536	UC
AT5G57640	UC	-2.08845	UC
AT1G66830	2.13699	UC	2.08558
AT5G49600	UC	UC	2.08173
AT5G50150	UC	-3.05321	-0.972303
ATMG00516	1.85	UC	2.08079
AT1G34760	-1.59124	-2.07863	UC
AT1G72270	UC	UC	2.07606
AT4G18660	UC	UC	2.07606
AT5G27765	UC	UC	2.07606
AT2G42170	-2.08901	-2.07429	UC
AT4G37750	-2.40757	-4.09597	-2.02226
AT3G50665	UC	UC	2.07283
AT3G63200	-1.34376	-2.06907	UC
AT5G54510	-1.6946	-2.06567	UC
AT3G15800	UC	-2.06497	UC
AT2G27180	2.17301	UC	2.06441
AT1G33800	UC	UC	2.06408
AT1G66320	UC	-2.06405	UC
AT2G30130	UC	-2.06405	UC
AT4G19030	UC	-2.06405	UC
AT5G58360	UC	-2.06405	UC
AT1G05420	UC	-2.06009	UC
AT3G58120	-4.58181	-6.39975	-4.34104
AT1G19960	-3.34236	-2.05608	UC
AT5G25620	UC	UC	2.0527
AT3G02920	-1.19481	-2.05258	UC
AT2G25880	-3.43852	-3.97893	-1.92896
AT1G13470	-2.53125	-2.04981	UC
AT2G36690	UC	-2.04897	UC
AT5G06380	UC	-2.04897	UC
AT3G08940	-1.15403	-2.04861	UC
AT1G15830	-5.01392	-4.92237	-2.87498
AT1G22330	-8.34566	-9.81521	-7.76811
AT5G01740	-2.2435	-2.04306	UC
AT1G45201	-1.76085	-2.04259	UC
AT3G09032	UC	-2.04186	UC
AT5G02515	UC	-2.03998	UC
AT5G02065	UC	UC	2.03831
AT2G33205	UC	-2.03609	UC
AT3G13880	UC	UC	2.03408
AT3G08660	UC	-2.03346	UC
AT5G18010	-2.04297	-2.0328	UC
AT1G74675	UC	-4.06863	-2.03605
AT5G01620	UC	-2.02837	UC
AT1G08283	UC	-2.0282	UC
AT3G15720	-3.05877	-2.02614	UC
AT5G65730	-6.80159	-7.8808	-5.85615
AT5G44973	-1.15401	-2.0216	UC
AT2G28410	-2.32537	-2.01997	UC
AT3G06070	-5.43027	-6.12745	-4.10813
AT5G18060	-1.45416	-2.01918	UC
AT1G43800	-2.3076	-4.00533	-1.9862
AT5G45650	-1.366	-2.01841	UC
AT3G01440	-1.88746	-2.01827	UC
AT1G75680	-1.50864	-2.01583	UC
AT1G05300	-2.1152	-2.01504	UC
AT3G21600	UC	UC	2.01167
AT1G68560	-1.3929	-2.01164	UC
AT2G21050	UC	-2.01154	UC
AT4G17460	-4.0695	-4.88825	-2.8793
AT1G77690	-2.6923	-4.68362	-2.67483
AT3G26500	-2.04427	-2.00549	UC
AT1G26590	UC	-2.00506	UC
AT2G43100	UC	-2.00492	UC
AT1G71030	-0.964384	-2.00331	UC
AT3G01330	UC	-2.00083	UC
AT4G28180	UC	-3.24385	-1.24531
AT4G01430	UC	UC	1.99447
AT5G39865	-3.07746	-1.99351	UC
AT4G21065	UC	UC	1.99114
AT1G18650	-1.32277	-1.99113	UC
AT2G16850	-3.71056	-4.71493	-2.73059
AT5G18690	-3.47991	-4.21969	-2.23614
AT4G39940	-1.77037	-1.98259	UC
AT2G31880	-2.44419	-1.97833	UC
AT5G41880	-2.13791	-1.97357	UC
AT5G33300	UC	-1.97343	UC
AT2G32100	-3.55962	-4.50686	-2.53381
AT2G36050	-5.48094	-6.22564	-4.25499
AT3G11110	-4.50133	-5.23981	-3.27461
AT2G36120	-2.1914	-3.49411	-1.53376
AT4G03190	-1.28089	-1.95857	UC
AT2G37460	-3.11767	-4.42735	-2.47321
AT3G05400	UC	UC	1.95088
AT1G29930	-1.20659	-1.94919	UC
AT5G62360	-6.68883	-7.42052	-5.47193
AT1G06080	-5.84101	-7.31767	-5.36937
AT2G34960	UC	-1.94802	UC
AT3G48080	-3.38041	-1.94412	UC
AT5G28020	UC	-1.94374	UC
AT3G55240	-1.41056	-1.93805	UC
AT1G21100	-1.87892	-1.93368	UC
AT3G47540	-2.36493	-1.93318	UC
AT1G76240	-5.2741	-6.28736	-4.3542
AT1G72200	UC	UC	1.93104
AT2G34490	UC	-1.92921	UC
AT4G36550	-1.62194	-1.92813	UC
AT2G15390	UC	-1.92791	UC
AT3G45140	UC	-1.92756	UC
AT4G31351	UC	UC	1.9258
AT2G24870	UC	UC	1.92508
AT5G54670	UC	-1.92323	UC
AT3G53380	-1.42703	-1.92317	UC
AT4G26580	1.99256	UC	1.9201
AT5G64900	-2.00736	-1.91864	UC
AT2G46130	2.34842	UC	1.91792
AT1G06977	UC	UC	1.91792
AT1G13825	UC	UC	1.91792
AT1G27140	UC	UC	1.91792
AT1G30455	UC	UC	1.91792
AT2G39320	UC	UC	1.91792
AT2G43139	UC	UC	1.91792
AT3G05105	UC	UC	1.91792
AT3G27785	UC	UC	1.91792
AT3G58060	UC	UC	1.91792
AT4G09375	UC	UC	1.91792
AT5G00855	1.97821	UC	1.91461
AT5G45880	UC	UC	1.91461
AT5G62830	UC	UC	1.91461
AT2G29370	UC	UC	1.91296
AT1G23070	2.63055	UC	1.91273
AT1G49800	UC	UC	1.91273
AT1G77530	UC	UC	1.91273
AT2G07748	UC	UC	1.91273
AT2G23660	UC	UC	1.91273
AT5G01747	UC	UC	1.91273
ATMG00720	UC	UC	1.91273
ATMG00930	UC	UC	1.91273
AT1G28470	UC	UC	1.90928
AT4G30280	-3.9021	-5.91009	-4.00084
AT5G52330	UC	UC	1.90753
AT2G22980	-1.06406	-1.90548	UC
AT5G44020	-7.42028	-8.4394	-6.53799
AT1G60590	-3.76621	-4.86884	-2.96925
AT1G71880	-1.3586	-1.89852	UC
AT1G11915	UC	-1.89652	UC
AT1G67780	UC	-1.89652	UC
AT3G23800	UC	-1.89652	UC
AT5G57650	UC	-1.89652	UC
AT5G37960	-1.84026	-1.89652	UC
AT3G01140	-2.99214	-1.89652	UC
AT4G20362	UC	-1.89335	UC
AT5G66740	UC	-1.88998	UC
AT1G66230	UC	-1.8892	UC
AT1G69523	-1.40308	-1.88897	UC
AT2G34790	UC	UC	1.88857
AT1G55390	UC	-1.88813	UC
AT1G13610	UC	-1.88763	UC
AT1G80340	UC	-1.88763	UC
AT2G32310	UC	-1.88763	UC
AT3G09605	UC	-1.88763	UC
AT4G35390	UC	-1.88763	UC
AT4G35350	-2.05481	-1.88568	UC
AT3G01080	-1.57929	-1.88543	UC
AT4G25240	-3.94649	-5.33674	-3.45229
AT2G32680	UC	-1.88361	UC
AT2G46040	UC	-1.88249	UC
AT3G59220	UC	-1.88249	UC
AT5G25880	UC	-1.8816	UC
AT1G06717	UC	-1.88016	UC
AT1G07175	UC	-1.88016	UC
AT3G16380	UC	-1.88016	UC
AT5G45455	UC	-1.88016	UC
AT1G69900	-4.3365	-4.1861	-2.30606
AT3G15990	UC	UC	1.87903
AT3G44970	-3.95433	-5.04074	-3.16355
AT1G10560	-1.46527	-1.87645	UC
AT5G58760	2.1591	UC	1.87373
AT1G33720	UC	-1.87302	UC
AT4G16160	3.24822	2.3202	4.19133
AT5G40150	-1.55633	-1.8699	UC
AT5G05880	2.45596	UC	1.86983
AT2G25680	UC	UC	1.86765
AT5G51890	UC	UC	1.86662
AT5G10520	UC	-1.86622	UC
AT4G19420	-1.22601	-1.86305	UC
AT3G13750	-5.33077	-6.60699	-4.74737
AT5G60285	UC	-1.85747	UC
AT2G41810	UC	UC	1.85313
AT4G02330	-6.85361	-5.11524	-3.26225
AT4G39770	-2.76722	-1.85249	UC
AT2G28630	UC	-6.21426	-4.36362
AT4G03400	UC	-1.84558	UC
AT5G03960	UC	-1.8429	UC
AT1G33811	-4.58995	-5.38737	-3.54527
AT1G35290	UC	-1.83943	UC
AT3G06140	-3.00429	-5.15898	-3.32065
AT2G32880	-1.29111	-1.83632	UC
AT3G10080	-3.75915	-4.43259	-2.5988
AT2G20750	-2.72277	-1.83304	UC
AT4G11211	-1.53317	-1.8324	UC
AT5G50010	-1.29844	-1.83005	UC
AT5G10240	-2.1376	-1.8295	UC
AT4G16740	UC	-1.82897	UC
AT2G25080	-1.1043	-1.82687	UC
AT5G64630	-1.14822	-1.82256	UC
AT1G49490	UC	-1.8213	UC
AT4G07960	UC	-1.82103	UC
AT3G63510	-1.24317	-1.81988	UC
AT2G19110	UC	-1.81862	UC
AT1G14350	-1.70118	-1.81861	UC
AT3G55515	UC	-1.81601	UC
AT5G27000	UC	-1.81391	UC
AT2G28460	UC	-1.81384	UC
AT1G11600	-2.47011	-1.81287	UC
AT3G13510	-1.5867	-1.81168	UC
AT2G45190	-1.01704	-1.81008	UC
AT5G57530	UC	-1.80851	UC
AT3G44940	UC	-3.91939	-2.11156
AT2G15020	UC	UC	1.80455
AT2G48130	UC	UC	1.80266
AT4G04485	UC	UC	1.79845
AT4G22120	-1.33978	-1.79408	UC
AT5G04310	-3.18347	-4.87873	-3.08589
AT1G32460	UC	-1.79147	UC
AT3G20150	-2.61281	-1.78981	UC
AT4G30680	-1.34058	-1.78794	UC
AT2G45180	-3.59014	-5.10043	-3.31318
AT4G29080	-1.39697	-1.78257	UC
ATCG01090	-4.48598	-1.78152	UC
AT4G17490	-4.07926	-4.16221	-2.38086
AT1G17060	-0.881255	-1.78108	UC
AT5G23360	-1.51182	-1.78078	UC
AT5G66570	-1.27743	-1.77459	UC
AT5G19600	UC	-4.42809	-2.65442
AT2G07690	-1.96075	-1.77363	UC
AT4G22305	-2.50671	-1.77306	UC
AT2G21260	1.10162	UC	1.7705
AT1G22550	UC	-1.7704	UC
AT3G18660	UC	UC	1.77009
AT3G26760	UC	-1.76904	UC
AT4G29740	-6.75944	-7.01503	-5.24748
AT1G11080	-1.70395	-1.76522	UC
AT4G35900	-2.72065	-1.76476	UC
AT1G49000	UC	-1.76385	UC
AT1G66920	-1.11146	-1.76192	UC
AT5G06690	-1.28359	-1.76163	UC
AT1G29520	-1.8066	-1.76156	UC
AT3G17680	-2.68247	-3.71438	-1.95403
AT1G76870	UC	-1.76004	UC
AT1G80920	-1.47136	-1.75958	UC
AT1G65590	-2.1777	-3.75058	-1.99112
AT3G52290	-1.85615	-1.75694	UC
AT1G19780	UC	-1.75653	UC
AT1G06710	2.43046	UC	1.75517
AT3G29370	-2.57164	-3.54696	-1.79253
AT5G51720	-5.38597	-5.21706	-3.46289
AT2G27990	1.77225	UC	1.75132
AT1G19990	-1.3907	-1.75101	UC
AT4G05085	-5.42718	-4.96492	-3.21492
AT1G80690	-1.71592	-2.67926	-0.93344
AT1G29270	-3.06002	-1.74506	UC
AT5G49570	UC	-1.74465	UC
AT1G26761	-1.52848	-1.7435	UC
AT5G18290	-2.32765	-1.74238	UC
AT1G23870	-1.76575	-1.74161	UC
AT5G01015	-1.74954	-1.73977	UC
AT4G23130	UC	-3.8381	-2.09874
AT5G55480	-3.12519	-4.35537	-2.62035
AT1G12240	-1.53394	-1.73312	UC
AT1G21060	UC	-1.7314	UC
AT1G52770	-2.5176	-1.72947	UC
AT1G30420	-1.39575	-1.72772	UC
AT3G49650	UC	-1.72734	UC
AT1G08340	UC	UC	1.72664
AT3G60580	UC	-1.72523	UC
AT4G23220	-2.58842	-3.26272	-1.53937
AT3G46490	-4.56218	-5.38537	-3.66206
AT5G45540	UC	-1.72224	UC
AT1G52700	-2.56165	-4.74924	-3.0275
AT1G60960	-1.07938	-1.72136	UC
AT1G73325	UC	-1.72132	UC
AT3G13960	-2.41035	-1.72104	UC
AT4G32570	UC	-1.72101	UC
AT5G02440	UC	-1.71661	UC
AT5G62840	UC	-2.40954	-0.696184
AT2G10940	-8.35821	-10.1913	-8.47821
AT1G51270	-1.02163	-1.71122	UC
AT3G60890	UC	-3.55355	-1.84587
AT1G60390	-3.14755	-1.70715	UC
AT3G26700	UC	-1.70712	UC
AT1G49210	-4.16779	-3.66098	-1.95442
AT1G63470	UC	-1.70595	UC
AT3G25020	-1.93089	-1.70567	UC
AT3G50400	UC	1.99081	3.69549
AT1G27110	UC	UC	1.70302
AT2G46710	-1.4737	-1.7025	UC
AT1G30600	UC	-1.70246	UC
AT1G10210	UC	UC	1.70206
AT3G52370	UC	-1.70109	UC
AT3G50220	UC	UC	1.70043
AT1G73210	1.56255	UC	1.69989
AT5G09970	UC	-1.69985	UC
AT1G65486	-3.90389	-4.33272	-2.63344
AT3G28960	UC	-4.01968	-2.32198
AT5G64170	UC	UC	1.6941
AT3G52530	UC	UC	1.69362
AT2G04790	-1.969	-3.50015	-1.8077
AT3G32980	UC	-1.6924	UC
AT4G33020	UC	UC	1.69239
AT4G05330	-1.19399	-1.69131	UC
AT5G51790	UC	-1.68937	UC
AT2G43550	-3.14267	-3.92303	-2.2341
AT1G47655	UC	-1.68846	UC
AT3G60150	1.4249	UC	1.68829
AT1G11120	-2.61246	-1.68789	UC
AT3G10880	UC	-3.57039	-1.88347
AT5G60890	UC	-1.68652	UC
AT3G27960	-0.861849	-1.68601	UC
AT4G01883	-1.78726	-1.6857	UC
AT5G61200	UC	-1.68532	UC
AT2G19330	UC	UC	1.68308
ATCG00480	UC	-1.6822	UC
AT5G52250	-1.70602	-1.67674	UC
AT5G11930	UC	-1.67666	UC
AT3G54600	UC	-1.67458	UC
AT2G29050	UC	-1.67322	UC
AT1G35180	-4.30351	-3.87155	-2.1992
AT1G09440	UC	UC	1.67135
AT5G38120	UC	-1.67022	UC
AT4G15660	UC	-1.66965	UC
AT1G29100	UC	UC	1.66948
AT1G36340	UC	UC	1.66948
AT1G49938	UC	UC	1.66948
AT1G60986	UC	UC	1.66948
AT2G08630	UC	UC	1.66948
AT3G03915	UC	UC	1.66948
AT3G12775	UC	UC	1.66948
AT5G01415	UC	UC	1.66948
AT5G23000	UC	UC	1.66948
AT5G40990	UC	UC	1.66948
AT1G03870	-6.43389	-8.01548	-6.34676
AT2G43690	UC	UC	1.66761
AT2G15080	-1.46825	-1.66526	UC
AT1G12570	-4.50794	-5.12396	-3.45876
AT5G43250	-1.49855	-1.66354	UC
AT5G07770	-1.63183	-1.66227	UC
AT1G38065	UC	-1.66157	UC
AT4G33070	UC	-1.65726	UC
AT5G52600	-1.71698	-1.65678	UC
AT3G52720	-3.45877	-4.85905	-3.20264
AT1G11260	-4.26768	-5.14634	-3.49144
AT1G03780	-2.95238	-4.53093	-2.87632
AT5G23010	-1.1872	-1.65181	UC
AT5G47530	3.83459	2.92832	4.57932
AT3G07675	UC	UC	1.64827
AT3G12170	-2.65402	-3.10234	-1.45826
AT1G47370	-2.51343	-1.64399	UC
AT5G09950	UC	1.8468	3.49071
AT5G09220	-0.983843	-1.64358	UC
AT2G04750	UC	-1.64285	UC
AT5G14150	UC	-1.64285	UC
AT5G55330	UC	-1.64285	UC
AT5G59895	UC	-1.64285	UC
AT5G61730	UC	-1.64285	UC
AT1G65620	UC	-1.64227	UC
AT5G65390	-5.31406	-7.28629	-5.64412
AT3G62820	-1.69153	-1.64203	UC
AT3G14190	-2.32864	-2.65966	-1.01852
AT5G10310	UC	-1.6399	UC
AT3G01680	-1.18201	-1.63967	UC
AT4G21310	UC	-1.63813	UC
AT2G42530	-1.10197	-1.63713	UC
AT3G26520	-3.88653	-5.34274	-3.70855
AT1G33610	-4.07622	-4.79893	-3.1652
AT4G19660	-2.13583	-1.63286	UC
AT4G24110	UC	-1.63221	UC
AT3G09730	-2.74606	-1.62644	UC
AT1G10490	UC	UC	1.62184
AT5G06420	UC	UC	1.62111
AT4G04630	-1.4109	-1.62055	UC
AT5G56230	-2.25824	-1.62018	UC
AT2G32430	1.35165	UC	1.61836
AT4G32340	-1.04685	-1.61694	UC
AT5G38990	-2.24348	-1.61654	UC
AT5G65683	UC	-1.61395	UC
AT4G30270	-2.99211	-4.65852	-3.04526
AT5G27390	-1.20489	-1.61126	UC
AT2G43750	-1.16743	-1.61031	UC
AT5G12860	-1.3062	-1.60852	UC
AT2G24600	-2.88753	-3.25946	-1.65202
AT5G50290	UC	-1.60469	UC
AT3G62570	-2.60161	-3.83099	-2.22921
AT4G22475	-6.25963	-5.90262	-4.30122
AT5G07175	UC	-1.60063	UC
AT4G13345	-0.960128	-1.6003	UC
AT4G01540	UC	UC	1.6002
AT3G06145	-5.01072	-4.89338	-3.2934
AT3G46550	UC	-1.59972	UC
AT2G44740	-5.67474	-6.24477	-4.64567
AT1G33960	UC	-1.59621	UC
AT5G62550	-4.32586	-5.54096	-3.94509
AT1G49320	UC	-1.59413	UC
AT5G41050	-1.20973	-1.58846	UC
AT5G24120	0.743561	UC	1.58794
AT1G09470	-3.15291	-3.96256	-2.37557
AT3G50750	-1.06561	-1.58654	UC
AT2G02540	UC	UC	1.58608
AT3G09260	UC	-3.33537	-1.75298
AT5G63580	1.36867	UC	1.58055
AT2G29550	-2.48705	-2.99259	-1.41211
AT1G49975	-0.907637	-1.57912	UC
AT1G69330	-0.539524	-1.57858	UC
AT3G54930	UC	-1.57721	UC
AT3G27050	-1.44733	-1.57672	UC
AT1G38131	UC	-1.57512	UC
AT3G12520	UC	UC	1.57233
AT5G40800	5.31314	4.83234	6.4039
AT1G08980	-1.01087	-1.57032	UC
AT3G60900	-4.02366	-4.86292	-3.29313
AT4G38400	-1.38931	-1.56765	UC
AT2G32590	UC	-1.56673	UC
AT2G32010	-1.34782	-1.56665	UC
AT5G23510	UC	-1.5657	UC
AT1G72910	-2.01937	-1.56534	UC
AT1G70820	-3.10107	-3.7609	-2.19589
AT5G25130	1.7542	UC	1.56424
AT5G01200	1.21884	UC	1.56319
AT4G23190	-2.06357	-1.56082	UC
AT3G60490	-2.91236	-3.0263	-1.46592
AT3G25290	UC	UC	1.55758
AT4G24015	UC	-1.55753	UC
AT4G37800	-3.68746	-5.30503	-3.74798
AT4G12420	-3.88167	-4.71102	-3.15485
AT3G12710	-2.57464	-1.55475	UC
AT1G19530	2.00196	UC	1.55394
AT1G18400	-3.24991	-4.2012	-2.6487
AT2G18780	1.85599	UC	1.55241
AT1G74080	UC	UC	1.55211
AT1G29460	-1.62101	-1.55124	UC
AT3G11520	-3.62751	-4.58855	-3.03779
AT1G62333	UC	UC	1.55023
AT5G16000	-1.73191	-1.54738	UC
AT2G34430	-6.10846	-6.8998	-5.3527
AT4G01700	UC	-1.54645	UC
AT3G62950	UC	-1.54614	UC
AT3G25690	-1.13379	-1.54542	UC
AT1G78320	UC	-1.54093	UC
AT1G53350	UC	-1.5408	UC
AT2G07643	UC	UC	1.53844
AT5G39000	-2.25063	-1.53673	UC
AT5G48220	-0.896603	-1.53437	UC
AT4G32000	UC	-1.53384	UC
AT3G01500	-5.5838	-6.05623	-4.52368
AT1G54110	UC	UC	1.53222
AT4G31840	-5.5217	-6.73285	-5.2012
AT5G28030	UC	-1.52996	UC
AT4G30520	UC	-1.52981	UC
AT5G52540	-1.04433	-1.52966	UC
AT1G34160	1.04686	UC	1.52919
AT1G75280	UC	-1.52886	UC
AT2G37130	-4.958	-6.11434	-4.58692
AT4G04955	-1.37794	-1.52737	UC
AT4G28140	UC	-1.52707	UC
AT1G15570	-2.25669	-4.57389	-3.0471
AT3G22890	-1.17055	-1.52479	UC
AT5G26330	UC	-1.52355	UC
AT1G02360	-7.38773	-7.00526	-5.4836
AT3G55370	UC	-1.52071	UC
AT4G39830	-2.59881	-1.51657	UC
AT5G25470	UC	UC	1.51551
AT3G51030	UC	-1.51507	UC
AT1G02050	1.50374	UC	1.51378
AT2G28660	-1.59875	-1.51229	UC
AT4G22010	-5.09851	-5.96113	-4.44906
AT5G55930	UC	-1.51167	UC
AT1G21520	-1.10361	-1.5109	UC
AT3G18535	UC	-1.50954	UC
AT4G37520	UC	-1.50683	UC
AT1G45207	-1.34515	-1.50625	UC
AT1G65346	UC	UC	1.50552
AT2G20670	-3.10427	-3.47911	-1.97403
AT2G01420	-0.939393	-1.5029	UC
AT5G22380	UC	UC	1.50206
AT5G07100	-1.19924	-1.5009	UC
AT2G40400	-0.924622	-1.49819	UC
AT1G69370	-0.821704	-1.49793	UC
AT4G23490	UC	UC	1.49676
ATMG01110	UC	UC	1.49401
AT4G09500	UC	UC	1.49224
AT1G72920	UC	-1.49218	UC
AT4G03510	-1.05656	-1.49173	UC
AT5G27330	UC	-1.48768	UC
AT5G21060	UC	-1.48604	UC
AT5G38730	UC	UC	1.48602
AT5G27220	UC	-1.48459	UC
AT2G18260	-1.29869	-1.4841	UC
AT3G04720	UC	-1.48386	UC
AT1G72450	-1.16574	-1.48348	UC
AT5G08520	UC	-1.48288	UC
AT3G10230	-1.62166	-1.48101	UC
AT3G07730	UC	UC	1.47987
AT3G58100	-1.47987	-1.47742	UC
AT1G51580	UC	-1.4774	UC
AT2G46630	-2.46966	-3.67437	-2.1979
AT5G22940	-5.72719	-6.15132	-4.67604
AT1G75380	UC	-1.47525	UC
AT1G29071	-1.64113	-1.47455	UC
AT2G13610	-2.19912	-2.92714	-1.45286
AT1G20010	-2.52286	-3.94971	-2.47973
AT5G66750	UC	-1.46874	UC
AT2G37180	-2.26374	-4.01733	-2.5489
AT5G22310	UC	-1.46766	UC
AT2G40530	-1.98524	-1.46582	UC
AT5G50420	UC	-1.4658	UC
AT5G39550	UC	-1.46555	UC
AT4G36670	-3.52959	-4.02736	-2.56211
AT2G34170	-1.38491	-3.94125	-2.4761
AT3G61310	-1.761	-2.8712	-1.40641
AT4G23260	-1.28513	-1.46459	UC
AT5G66920	-4.49877	-5.01696	-3.55419
AT5G20250	-6.06491	-6.57882	-5.11833
AT1G03760	2.08691	UC	1.46048
AT5G56840	-4.31922	-6.06417	-4.6047
AT5G57550	UC	-1.45848	UC
AT1G67910	-3.09218	-2.80268	-1.34427
AT2G42610	-1.02799	-1.45825	UC
AT2G32390	UC	-1.45771	UC
AT4G01580	UC	-1.45697	UC
AT1G51700	0.682554	UC	1.45644
AT1G09780	UC	-1.4552	UC
AT3G18710	-1.19606	-1.45223	UC
AT5G46700	-2.57792	-3.00659	-1.55631
AT4G29170	UC	UC	1.44839
AT1G18570	UC	-1.44812	UC
AT5G06430	UC	-1.44728	UC
AT3G21190	-0.868038	-1.44697	UC
AT2G47500	UC	-1.44692	UC
AT4G37770	-4.65874	-6.28978	-4.84382
AT3G19620	UC	UC	1.44536
AT1G06640	-0.867328	-1.44351	UC
AT1G49750	-4.64699	-4.70071	-3.25816
AT1G73590	UC	-1.44173	UC
AT4G30250	UC	-1.4412	UC
AT4G33420	UC	-1.44105	UC
AT2G38760	UC	-1.44098	UC
AT3G52430	-1.55297	-1.43934	UC
AT1G55360	-1.28834	-1.43915	UC
AT1G76800	-1.14498	-1.43909	UC
AT1G18870	-1.39419	-1.43441	UC
AT5G04200	UC	UC	1.43378
AT4G37100	UC	-1.43244	UC
AT5G67160	UC	UC	1.43178
AT1G30280	-3.29857	-4.49431	-3.06455
AT5G67260	-1.03232	-1.42956	UC
AT1G76100	-1.16373	-1.42739	UC
AT5G63650	UC	-1.42489	UC
AT5G10700	-0.656708	-1.4239	UC
AT2G15890	-1.07866	-1.42154	UC
AT1G54740	-1.37047	-1.4206	UC
AT4G23290	-4.30952	-4.34917	-2.92865
AT4G03110	-2.63387	-3.87579	-2.45592
AT3G04010	UC	UC	1.4196
AT4G17340	-2.98483	-3.86914	-2.44961
AT4G10380	1.34119	UC	1.41911
AT2G44690	-3.39378	-3.29817	-1.87921
AT1G03850	-3.32361	-1.41606	UC
AT3G19553	-1.08943	-1.41486	UC
AT1G59590	-2.22202	-1.41154	UC
AT2G19240	UC	UC	1.40908
AT3G48100	-1.62933	-1.40825	UC
AT5G39020	UC	-1.40745	UC
AT3G05730	-7.98616	-9.14183	-7.73458
AT4G28250	-3.45576	-3.93521	-2.52886
AT2G17480	UC	-1.40594	UC
AT1G78450	-4.58184	-6.10327	-4.69746
AT2G25460	UC	UC	1.40367
AT2G25735	-4.67604	-3.99566	-2.59223
AT5G56780	UC	-1.40327	UC
AT5G38420	-6.52198	-7.28098	-5.8799
AT3G52940	-1.04376	-1.40037	UC
AT4G14040	UC	-1.39996	UC
AT2G44920	-1.12091	-1.39994	UC
AT4G27450	UC	-1.39983	UC
AT3G22400	UC	-1.39829	UC
AT3G04130	UC	UC	1.3975
AT2G05540	1.84893	0.604394	2.00115
AT5G54240	UC	UC	1.39648
AT5G55340	-3.19364	-4.71924	-3.32288
AT3G53690	2.12391	1.38552	2.78085
AT4G10760	UC	UC	1.39365
AT3G05470	-3.30144	-3.95193	-2.55912
AT2G47270	UC	UC	1.39276
AT5G54270	-2.20079	-3.48502	-2.09302
AT5G63350	5.79249	5.8613	7.25158
AT5G59020	UC	-1.39012	UC
AT4G13000	-2.50162	-1.3895	UC
AT5G10450	-1.05641	-1.38726	UC
AT1G04680	-4.41771	-4.40386	-3.01666
AT2G39730	-2.07931	-3.01141	-1.62535
AT3G44740	UC	UC	1.38555
AT1G65060	-1.85441	-1.384	UC
AT4G04840	-5.83823	-7.42825	-6.04437
AT4G15700	UC	-1.38304	UC
AT2G33280	4.14163	3.49472	4.87572
AT1G49470	UC	-1.38052	UC
AT3G23805	-2.40054	-3.08927	-1.7092
AT1G48600	UC	-1.37882	UC
AT1G58370	-1.35367	-2.635	-1.25716
ATMG00640	1.06594	UC	1.37761
AT1G09160	-0.86373	-1.37696	UC
AT1G19510	-1.79933	-1.37624	UC
AT3G48425	-1.39113	-1.37572	UC
AT1G76740	-2.91155	-3.73541	-2.36027
AT1G02950	UC	-1.3748	UC
ATCG01300	UC	-1.37392	UC
AT1G32190	-1.81509	-1.37315	UC
AT1G01620	-4.49735	-4.90442	-3.53212
AT2G41380	UC	UC	1.37204
AT3G45590	UC	UC	1.37203
AT3G19450	-1.24825	-1.37187	UC
AT1G15380	UC	UC	1.37121
AT3G29173	UC	UC	1.37051
AT1G01380	UC	UC	1.37015
AT1G31410	-0.665481	-1.36945	UC
AT1G55200	-3.42788	-3.22594	-1.85715
AT4G28490	-1.42495	-1.36797	UC
AT5G55730	-2.88331	-3.76055	-2.39369
AT4G33560	-2.12347	-2.52242	-1.15763
AT2G35343	2.70977	3.66695	5.03164
AT5G27780	-3.22789	-3.62726	-2.26267
ATCG00840	UC	-1.36266	UC
AT1G46480	UC	-3.6984	-2.33575
AT2G34060	-2.14414	-3.34114	-1.97901
AT3G60390	-1.17172	-1.36164	UC
AT2G01505	0.75614	UC	1.36031
AT3G56060	-2.69407	-3.63144	-2.27143
AT5G66330	-2.68122	-3.76585	-2.40621
AT5G39380	UC	-1.35964	UC
AT3G04060	0.880512	UC	1.35943
AT3G05800	-3.36218	-3.45924	-2.1011
AT1G57980	-1.96404	-1.3574	UC
AT5G64570	UC	-1.35696	UC
AT4G25700	1.25564	UC	1.3562
AT1G05210	-3.4675	-4.68905	-3.33286
AT5G66230	UC	-3.01584	-1.66001
AT1G68840	-3.83542	-4.4802	-3.1247
AT5G02180	UC	-1.35504	UC
AT2G39980	-1.43273	-1.35458	UC
AT3G50700	-1.02298	-1.35418	UC
AT1G23080	UC	-1.35246	UC
AT3G55646	UC	-4.5934	-3.24155
AT3G56940	-0.888963	-1.35131	UC
AT3G12090	UC	UC	1.35118
AT1G44575	-1.12876	-1.35083	UC
AT2G44745	UC	UC	1.34604
AT5G38410	-5.20145	-5.9898	-4.64376
AT1G15670	UC	-1.34591	UC
AT2G05315	UC	UC	1.34586
AT3G48590	-1.11435	-1.34568	UC
AT2G34090	UC	-1.34521	UC
AT4G30060	UC	-1.34339	UC
AT1G15820	-2.56341	-3.57145	-2.2304
AT5G20420	UC	UC	1.33994
AT5G16590	-2.48322	-3.69354	-2.3536
AT3G52910	UC	-1.33941	UC
AT2G18690	UC	-1.33814	UC
AT3G43610	UC	-1.33814	UC
AT1G67750	-4.18169	-4.47244	-3.13436
AT2G41640	UC	UC	1.33741
AT1G26520	UC	UC	1.33623
AT4G21500	UC	-1.33613	UC
AT1G21210	UC	UC	1.33563
AT1G15190	1.50211	2.25544	3.59075
AT4G37445	UC	-1.33447	UC
ATCG00610	-1.47193	-1.33349	UC
AT1G13180	-0.994153	-1.33349	UC
AT2G19170	-3.58516	-4.23398	-2.90103
AT3G51330	-1.57521	-1.33197	UC
AT1G17147	-2.66902	-1.33068	UC
AT3G17710	UC	UC	1.33015
AT5G03180	1.27659	UC	1.32861
AT4G17470	UC	UC	1.32809
AT5G40382	6.01412	6.76762	8.09549
ATCG00790	-1.17655	-1.32783	UC
AT3G48460	-1.16693	-1.3276	UC
AT3G04854	UC	-1.32518	UC
AT3G52900	UC	-1.32409	UC
AT2G41830	-1.22283	-1.3233	UC
AT5G23420	-1.63308	-1.32312	UC
AT1G24577	UC	-1.32254	UC
AT1G14700	UC	-1.32046	UC
AT4G17350	-1.50092	-1.31921	UC
AT1G29920	-2.53137	-3.70902	-2.38996
AT4G12030	UC	-1.31894	UC
AT2G17550	-0.964656	-1.3165	UC
AT3G43800	-2.47116	-2.55049	-1.23486
AT3G13470	-1.36038	-1.31478	UC
AT2G15050	-1.27541	-1.31155	UC
AT3G01690	-0.772192	-1.31094	UC
AT4G24175	UC	-1.30938	UC
AT3G19480	UC	-1.30904	UC
AT1G74890	-3.25586	-4.32789	-3.0192
AT2G34510	-3.18657	-4.40747	-3.09902
AT2G37100	UC	-1.30828	UC
AT2G07675	UC	UC	1.30672
AT1G31010	UC	UC	1.30643
AT2G15620	-1.30848	-1.30524	UC
AT3G45160	UC	-1.3045	UC
AT5G08760	-1.83614	-2.6063	-1.30192
AT3G02700	-1.14508	-1.30405	UC
AT5G57800	-1.22045	-1.30353	UC
AT5G46780	-1.43199	-1.3029	UC
AT1G71970	-1.03555	-1.30275	UC
AT5G11540	UC	-1.30181	UC
AT5G49480	UC	UC	1.30134
AT3G53420	-2.08419	-2.96258	-1.66235
AT4G22513	-5.69022	-5.14323	-3.84308
AT5G18170	-1.07101	-1.30005	UC
AT1G13100	-1.28574	-1.29949	UC
AT5G43620	UC	UC	1.29656
AT3G46090	UC	-1.2957	UC
AT1G67860	UC	-1.29392	UC
AT1G53290	UC	-1.29367	UC
AT1G67260	UC	-1.29185	UC
AT3G05320	-0.990679	-1.28975	UC
AT5G19140	UC	-1.28769	UC
AT3G16240	-5.13446	-5.90773	-4.6217
AT5G46600	UC	-1.28568	UC
AT5G67420	-0.811938	-1.28504	UC
AT2G23680	-1.36585	-1.28446	UC
AT4G18640	-1.37231	-1.28378	UC
AT4G19191	UC	UC	1.28229
AT1G62630	-0.900552	-1.28078	UC
AT2G32140	UC	-1.28006	UC
AT5G49560	UC	-1.27978	UC
AT5G65320	1.4893	1.236	2.5122
AT5G57660	-0.869677	-1.27617	UC
AT1G08010	UC	-1.27587	UC
AT1G60890	0.593885	UC	1.27483
AT4G15690	UC	-1.27483	UC
AT3G17580	UC	-4.29538	-3.02221
AT1G45010	-1.82254	-1.2723	UC
AT5G43980	UC	UC	1.2721
AT5G28630	-5.53975	-6.18244	-4.91199
AT5G23350	-4.06151	-3.81654	-2.54609
AT2G32150	-1.02418	-1.27028	UC
AT4G18370	-1.66404	-1.27024	UC
AT5G04530	1.24678	UC	1.27021
AT4G06955	UC	-2.63602	-1.36771
AT2G37170	-2.4686	-3.43262	-2.16534
AT1G58070	UC	-1.26726	UC
AT3G02110	-2.05161	-2.88577	-1.61888
AT3G22231	-5.51586	-4.54195	-3.27672
AT4G38420	-2.00628	-3.08659	-1.82144
AT2G40690	UC	-1.26354	UC
AT1G33770	-2.90136	-3.78775	-2.52434
AT3G07000	-2.00318	-4.34126	-3.07929
AT1G32540	UC	-1.26036	UC
AT4G25900	UC	-1.25975	UC
AT5G44680	-3.78467	-4.42485	-3.16529
AT4G30690	UC	-1.25782	UC
AT2G03260	UC	UC	1.25771
ATCG00940	UC	-1.25749	UC
AT3G09190	UC	-1.25606	UC
AT3G60700	-3.2474	-4.0564	-2.8011
AT4G00480	-1.58852	-1.25511	UC
ATMG00960	UC	UC	1.25481
AT1G10140	UC	UC	1.25474
AT4G25600	UC	UC	1.2543
AT1G26810	-1.44816	-1.25222	UC
AT2G03710	UC	UC	1.25096
AT1G49832	1.22734	UC	1.25095
AT1G15520	UC	UC	1.25059
AT4G39330	UC	-1.25026	UC
AT2G07680	UC	-1.24989	UC
AT5G24660	UC	-1.24897	UC
AT4G31050	-1.2705	-1.24756	UC
AT5G47500	-4.27479	-4.55421	-3.30712
AT4G20070	-1.40418	-1.24701	UC
AT5G42330	UC	-1.24668	UC
AT1G62610	2.40208	UC	1.24621
AT4G35110	-1.09234	-1.24618	UC
AT5G11970	UC	-1.2458	UC
AT5G47240	-1.07276	-1.2449	UC
AT5G56040	UC	-1.24434	UC
AT4G30000	UC	-1.24406	UC
ATCG01100	UC	-1.24351	UC
AT5G14200	-2.29994	-2.80587	-1.56291
AT1G30440	-1.05695	-1.24263	UC
AT4G39710	-2.83345	-3.80659	-2.56581
AT2G13960	UC	UC	1.24063
AT2G37660	-0.608392	-1.23905	UC
AT4G32915	UC	-1.23778	UC
AT5G23860	-2.24208	-2.97955	-1.74306
AT3G50630	-1.11288	-1.23554	UC
AT1G21640	-1.01195	-1.23363	UC
AT1G18250	-6.87835	-6.99525	-5.76171
AT1G67865	-1.19483	-1.23333	UC
AT5G05680	1.15987	UC	1.23286
AT3G14760	-2.38054	-3.34123	-2.10863
AT1G16260	-2.40066	-1.23111	UC
AT1G08510	-1.11645	-1.23083	UC
AT4G31870	UC	-1.22965	UC
AT1G01920	UC	UC	1.22954
AT2G40000	-1.48797	-1.22944	UC
AT4G13770	UC	-1.22871	UC
AT3G51280	-5.29697	-5.38778	-4.15914
AT1G03457	-3.97156	-3.55632	-2.32904
AT5G14690	UC	-2.53399	-1.30953
AT3G26570	-0.934305	-1.22415	UC
AT1G30730	-4.70888	-5.09094	-3.86683
AT2G19780	-1.67216	-2.46972	-1.24932
AT1G18620	-3.07607	-3.97095	-2.75057
AT1G23380	UC	-1.22003	UC
ATMG00980	UC	UC	1.21935
AT5G62280	-2.9334	-3.96751	-2.74855
AT1G23010	UC	UC	1.2187
AT5G07322	UC	-1.21791	UC
AT1G73805	-1.85851	-1.21612	UC
AT3G13060	UC	-1.21584	UC
AT5G23020	UC	-3.38004	-2.16451
AT4G01950	-1.71609	-1.21494	UC
AT3G13740	UC	-1.2142	UC
AT3G54400	-5.1997	-6.25073	-5.03659
AT3G26782	0.865628	UC	1.21296
AT3G63140	-2.81052	-3.40086	-2.19166
AT3G03820	-1.14384	-1.2072	UC
AT3G48720	-4.35858	-4.80917	-3.6026
AT5G64120	-5.46525	-6.3258	-5.11928
AT4G10340	-2.06637	-3.03969	-1.83356
AT1G48770	UC	-1.20546	UC
AT3G01750	-1.63403	-2.39494	-1.19068
AT5G20400	-0.743315	-1.20379	UC
AT1G19770	-1.35965	-1.20354	UC
AT2G01400	UC	UC	1.20321
AT1G09937	0.983135	UC	1.20302
AT2G38110	UC	-1.20292	UC
AT1G22650	-3.30928	-3.62869	-2.42578
AT2G07674	UC	UC	1.20275
AT4G24120	UC	-1.20219	UC
AT2G35190	-2.3551	-3.00448	-1.80305
AT2G42260	-4.45576	-3.79485	-2.59436
AT2G32200	-3.15763	-4.42402	-3.22394
AT1G70185	UC	UC	1.19993
AT5G04470	UC	-1.19909	UC
AT5G53550	-1.36554	-1.19804	UC
AT5G62710	UC	-1.1974	UC
ATCG01010	-1.51129	-1.19465	UC
AT1G67470	UC	-1.19333	UC
AT3G46780	-2.9064	-3.55846	-2.3653
AT1G65790	-1.82079	-1.19292	UC
AT3G03535	UC	2.18433	3.37687
AT1G21540	-2.28315	-3.8032	-2.61269
AT4G12470	-6.09479	-7.12886	-5.93867
AT1G72230	UC	-1.18988	UC
AT5G48490	-4.45689	-5.29967	-4.10984
AT4G26540	-2.46917	-3.80261	-2.61282
AT2G30520	-0.688678	-1.18895	UC
AT1G63300	-2.02197	-1.18809	UC
AT5G06710	UC	UC	1.18676
AT1G68238	-2.72171	-3.49142	-2.30672
AT1G01600	-4.85381	-5.57635	-4.392
AT2G39450	-0.824173	-1.18236	UC
AT4G10120	-1.23336	-1.18102	UC
AT5G04950	1.34225	UC	1.1807
AT1G72610	-6.49369	-7.11548	-5.93516
AT5G05560	UC	UC	1.18029
AT4G36150	-1.39485	-1.18022	UC
AT1G64280	-0.808211	-1.17963	UC
AT4G02770	-1.49072	-2.2648	-1.08672
AT1G69870	UC	UC	1.17715
AT4G35950	-0.885409	-1.17712	UC
AT3G60510	-0.994733	-1.17693	UC
AT2G23100	UC	-1.17422	UC
AT4G11590	UC	1.9785	3.15239
AT5G66310	-2.5409	-2.81687	-1.64324
AT4G03100	-4.65369	-5.70041	-4.52914
AT4G14360	-1.57506	-1.17092	UC
AT2G07749	1.41879	UC	1.17067
AT3G47750	UC	-2.75868	-1.58934
AT5G23530	UC	-1.16792	UC
AT2G24610	-3.47167	-3.72904	-2.56127
AT1G21500	-2.39778	-3.41295	-2.24631
AT5G04205	UC	UC	1.1665
AT2G26500	-0.932965	-1.1659	UC
AT2G44940	UC	-1.1654	UC
AT5G36710	-5.61414	-5.83799	-4.67319
AT1G28660	UC	-1.16447	UC
AT4G24026	-1.79571	-1.1641	UC
AT4G15560	-0.636196	-1.16399	UC
AT2G31600	0.673902	UC	1.16348
AT1G73760	UC	-1.16203	UC
AT4G22160	-0.656011	-1.16006	UC
AT3G15620	-2.21684	-2.65839	-1.4991
AT2G44850	1.16453	UC	1.15918
AT5G36800	-5.61554	-5.81086	-4.65183
AT1G22480	6.59912	4.25247	5.41131
AT4G29310	-6.67624	-6.3432	-5.18462
AT1G15550	UC	-1.15834	UC
AT5G22580	-5.02014	-4.6282	-3.4707
AT2G28550	0.771998	UC	1.15734
AT5G63850	-2.01504	-3.30491	-2.1479
AT4G18290	UC	-1.1568	UC
AT1G77990	-1.65748	-2.48532	-1.32898
AT5G36220	1.08358	UC	1.15616
AT5G61270	UC	-1.15535	UC
AT3G52780	4.51586	3.80015	4.95469
AT1G80440	-0.874782	-1.15254	UC
AT1G12780	UC	-1.15189	UC
AT1G70895	-0.773637	-1.15093	UC
AT3G56590	UC	-1.15022	UC
AT5G02760	-7.04333	-6.06928	-4.9199
AT1G52230	-2.26506	-3.11563	-1.96647
AT1G10380	UC	-1.14843	UC
AT1G62510	3.34422	2.33998	3.4881
AT4G36530	-0.999833	-1.14807	UC
AT4G23740	-0.926513	-1.14802	UC
AT3G17640	-2.60045	-3.95785	-2.81014
AT4G22570	-1.10446	-1.14703	UC
AT1G16410	UC	-1.14697	UC
AT1G47670	-1.39028	-1.14649	UC
ATCG00750	UC	-1.14601	UC
AT3G61430	-0.482137	-1.14582	UC
AT2G30890	UC	-3.72743	-2.58181
AT5G07660	UC	-2.76736	-1.62216
AT2G37025	-4.07047	-3.67593	-2.53089
AT5G53050	-0.923331	-1.14479	UC
AT1G69690	-0.717136	-1.14245	UC
AT5G02540	-3.00124	-4.40425	-3.26208
AT3G50840	UC	UC	1.14213
AT5G56120	-4.0276	-5.27999	-4.13814
AT3G16690	-5.30316	-5.08057	-3.93904
AT5G58390	-1.09631	-1.14114	UC
AT1G67105	0.815974	UC	1.14033
AT1G26920	0.676467	UC	1.14026
AT2G35155	UC	-1.13863	UC
AT5G03355	-3.5529	-5.56973	-4.43149
AT5G61980	UC	-1.13781	UC
AT5G48910	UC	-1.13589	UC
AT1G33170	-3.38874	-3.66511	-2.52934
AT3G44260	UC	-1.13565	UC
AT5G23820	-2.34341	-3.24386	-2.10856
ATCG01190	UC	-1.13491	UC
AT1G09630	UC	-1.13425	UC
AT1G49130	UC	-1.13327	UC
AT2G01070	-0.63221	-1.13326	UC
AT1G49230	-2.15042	-2.41366	-1.282
AT1G28130	-2.9551	-2.70634	-1.57607
AT1G23480	-6.06698	-6.49103	-5.36114
AT5G15600	UC	-4.05615	-2.92655
AT1G61360	UC	-1.12949	UC
AT5G16150	-0.648567	-1.12945	UC
AT1G04520	-5.41093	-5.10268	-3.97464
ATCG00090	UC	-1.12804	UC
AT3G23090	UC	-1.12739	UC
AT1G06410	-0.709357	-1.12648	UC
AT4G27020	UC	UC	1.12569
AT2G19385	UC	UC	1.12555
AT1G16500	UC	-1.12529	UC
AT4G38620	-2.07308	-2.82442	-1.69974
AT5G52380	1.16147	UC	1.12381
AT2G32487	-2.36869	-2.63075	-1.50723
AT3G23080	-0.628676	-1.12337	UC
AT3G15070	UC	-1.12053	UC
AT2G19460	-0.831756	-1.12018	UC
AT1G31935	UC	-1.12003	UC
AT4G06744	UC	UC	1.11838
AT1G07650	UC	-1.11834	UC
AT5G14740	-3.08177	-3.70932	-2.59117
AT3G20600	-1.35914	-1.1181	UC
AT2G07652	1.86847	UC	1.11775
AT1G71020	-1.15122	-2.00947	-0.892716
AT3G53260	UC	-1.11663	UC
AT4G30410	-2.30337	-2.81409	-1.69812
AT1G65240	UC	-3.20015	-2.08435
AT1G28210	UC	UC	1.1146
AT4G24040	-1.17175	-1.11369	UC
AT1G80460	-0.825917	-1.11309	UC
AT2G24580	UC	-1.11257	UC
AT5G38110	-1.37667	-1.11249	UC
AT3G57070	-1.07197	-1.11153	UC
AT1G10850	-1.61469	-1.11043	UC
AT4G03390	-0.605032	-1.10992	UC
AT5G14660	-0.712158	-1.10949	UC
AT4G18480	-1.58484	-2.41455	-1.30518
AT3G45090	UC	-1.10919	UC
AT3G20362	UC	-1.10872	UC
AT4G27595	UC	-1.10716	UC
AT4G25470	UC	UC	1.10572
AT1G64170	-4.80043	-4.49286	-3.38802
AT5G57170	-0.898213	-1.1039	UC
AT4G13260	-3.71869	-3.93101	-2.82789
AT2G35500	-0.562827	-1.10177	UC
AT1G45231	UC	UC	1.10174
AT3G22970	UC	-1.10121	UC
AT1G29910	-1.88185	-2.66285	-1.56388
AT5G16250	-4.86863	-5.33887	-4.24004
AT4G27940	UC	UC	1.09798
AT1G69530	-3.70958	-4.49038	-3.39297
AT1G71240	0.898615	UC	1.09733
AT4G12900	UC	-1.76927	-0.672917
AT3G58150	4.1316	2.966	4.06155
AT4G33840	UC	-1.09548	UC
ATCG00080	UC	-1.09512	UC
AT5G03150	-0.898343	-1.09422	UC
AT5G06870	-2.89243	-3.84176	-2.74822
AT5G62410	UC	-1.09326	UC
AT2G29970	-0.789684	-1.09194	UC
AT3G50120	-3.85248	-4.78149	-3.69104
AT1G30720	-4.88235	-5.73154	-4.64109
AT5G50450	-1.5945	-2.07901	-0.988604
AT2G16380	UC	-1.09037	UC
AT5G39980	UC	-1.08921	UC
AT4G38660	-4.44969	-5.04651	-3.95782
AT2G46225	-1.53498	-2.67151	-1.58293
AT5G13630	-2.01087	-2.8497	-1.76213
AT4G21280	-2.46502	-3.29748	-2.21047
AT5G18370	UC	UC	1.08674
ATCG00140	UC	-1.08627	UC
AT5G12950	1.17008	UC	1.08537
AT1G12320	UC	-1.08532	UC
AT1G78915	UC	-1.08488	UC
AT2G39200	-2.65282	-2.51532	-1.43067
AT1G07020	UC	-1.08462	UC
AT2G41312	UC	-1.08418	UC
AT5G36740	UC	-1.08266	UC
AT1G68110	UC	-3.18782	-2.10531
AT1G58110	-0.413665	-1.08239	UC
AT5G06340	-0.642998	-1.08187	UC
ATCG00760	-1.82753	-1.08186	UC
AT5G18490	-0.686508	-1.08158	UC
AT4G14310	-1.99536	-3.44603	-2.3658
AT1G69230	0.872789	UC	1.07954
AT1G31690	-6.11371	-7.22807	-6.1487
AT5G44565	-1.40217	-1.07918	UC
AT1G63250	UC	UC	1.07879
AT4G13290	2.64692	1.89678	2.97525
AT3G11210	UC	-1.07841	UC
AT1G08440	UC	2.10699	3.18508
AT4G28950	-3.61074	-5.05619	-3.97849
AT2G15042	UC	-1.07748	UC
AT5G54148	UC	-5.01098	-3.93354
AT5G14060	UC	-1.07675	UC
AT3G59700	0.616598	UC	1.07523
AT4G01120	0.484768	UC	1.07451
AT1G71050	UC	UC	1.07439
AT1G65350	UC	UC	1.07418
AT1G78240	UC	-1.0737	UC
AT2G33530	-0.914254	-1.07323	UC
AT3G20570	-1.67509	-2.27118	-1.19878
AT4G27230	-0.550556	-1.07156	UC
AT5G13180	-1.06703	-1.07114	UC
AT4G14540	-2.50128	-1.07096	UC
AT3G25130	-3.4994	-3.31232	-2.24147
AT1G09340	-2.81906	-3.22875	-2.1588
AT1G76380	1.14107	UC	1.06832
AT3G45780	-0.555515	-1.06827	UC
AT1G52140	-3.01828	-3.68159	-2.6134
AT4G00520	1.19058	UC	1.0678
AT3G47470	-1.07947	-1.98001	-0.912262
AT4G32140	UC	-1.06723	UC
AT5G04490	-0.595419	-1.06694	UC
AT3G16650	UC	UC	1.06573
AT2G07180	-0.968157	-1.06492	UC
AT5G13610	UC	-1.06487	UC
AT3G08670	UC	-1.06441	UC
AT5G49800	-4.43796	-3.4486	-2.38467
AT5G35740	-4.14442	-5.14232	-4.07958
AT4G11310	5.29197	4.44107	5.50351
AT4G04700	UC	-3.3857	-2.32376
AT2G45960	-0.840005	-1.06188	UC
AT4G34150	-1.23025	-1.06168	UC
ATMG01060	0.937808	UC	1.06145
AT3G17100	-0.600897	-1.06134	UC
AT5G09315	1.12015	UC	1.06039
AT2G33570	-1.13559	-1.06029	UC
AT3G23150	UC	-1.06016	UC
AT2G33080	5.17582	4.6249	5.6847
AT5G54830	UC	UC	1.05892
AT1G07180	-0.972828	-1.05819	UC
AT2G38700	-0.688805	-1.05756	UC
AT5G41750	UC	-1.05715	UC
AT5G37600	UC	-1.05682	UC
AT2G45340	UC	-1.05635	UC
AT5G48790	-1.10468	-1.88384	-0.828078
AT5G57830	UC	-1.05503	UC
AT5G38610	UC	-1.05473	UC
AT5G21482	UC	-1.05421	UC
AT4G16680	UC	UC	1.05416
AT4G28040	UC	UC	1.05409
AT2G41700	0.969668	UC	1.05397
AT1G71140	UC	UC	1.05321
AT3G08870	UC	1.01285	2.0652
AT1G31430	UC	UC	1.05105
AT5G06570	UC	-3.37991	-2.3289
AT4G18210	UC	UC	1.05073
AT3G45260	-1.08785	-1.04995	UC
AT1G63050	0.894457	UC	1.04891
AT2G24060	-0.65349	-1.04885	UC
AT1G67840	-0.563151	-1.04853	UC
AT1G03746	UC	-1.04832	UC
AT2G20340	UC	-1.04819	UC
AT3G01940	-1.3523	-1.04808	UC
AT3G55040	UC	-1.04793	UC
AT3G50660	-1.011	-1.04755	UC
AT1G11850	-4.48262	-5.03947	-3.99204
AT4G39270	UC	UC	1.0474
AT4G04340	UC	-1.04687	UC
AT3G55130	UC	-1.04677	UC
AT2G24762	-0.76264	-1.04654	UC
AT2G16430	-1.6753	-1.04596	UC
AT1G51940	-1.70214	-2.50455	-1.45872
AT3G07340	-4.35972	-2.83217	-1.78689
AT5G16480	UC	-1.04514	UC
AT1G75590	-3.3026	-3.98217	-2.93908
AT3G03990	UC	-1.04254	UC
AT1G07570	UC	-1.04172	UC
AT1G23740	UC	UC	1.04134
AT5G57280	0.868261	UC	1.04108
AT4G01750	-2.71451	-2.85122	-1.81186
AT3G16410	UC	UC	1.03929
AT5G64450	2.72683	UC	1.03817
AT1G54780	UC	-1.03769	UC
AT3G51720	-1.60721	-1.0374	UC
AT1G77490	-3.07273	-3.17222	-2.13545
AT5G66080	UC	UC	1.03647
AT1G68010	-0.71092	-1.03618	UC
AT2G23770	-1.12899	-1.03554	UC
AT5G63380	-1.17953	-1.03507	UC
AT5G19580	UC	-1.03387	UC
AT2G18196	UC	UC	1.03378
AT5G40670	-0.735727	-1.03246	UC
AT3G43600	UC	-1.03228	UC
AT5G67190	-1.2617	-1.03023	UC
AT4G16857	UC	-1.03021	UC
AT4G23400	-3.21642	-3.87325	-2.84316
AT5G57345	UC	UC	1.03007
AT5G46240	-3.2086	-4.22015	-3.19129
AT1G75250	-4.79227	-5.74054	-4.71315
AT3G48550	-0.759732	-1.02672	UC
AT3G28840	UC	UC	1.02434
AT5G52510	1.08458	UC	1.02379
AT1G02335	UC	UC	1.02166
AT2G05990	UC	-1.02104	UC
AT1G77580	2.26209	1.6678	2.68873
AT5G51910	UC	-1.02083	UC
AT1G05590	UC	-1.01983	UC
AT3G17650	-0.64466	-1.01912	UC
AT3G63410	-0.754538	-1.0182	UC
AT2G21210	-0.857336	-1.01791	UC
AT1G28610	UC	UC	1.01766
AT2G16660	-3.39486	-4.86016	-3.84305
AT4G32840	-0.819649	-1.84501	-0.828264
AT3G11090	UC	-1.01662	UC
AT4G10770	-1.61795	-1.75155	-0.735398
AT3G21540	1.22516	UC	1.01433
AT5G61190	-0.834355	-1.01388	UC
AT4G32460	UC	-1.01357	UC
AT5G50950	-0.912901	-1.01308	UC
AT1G76410	UC	-1.95301	-0.941199
AT3G17660	1.09773	UC	1.01181
AT1G14880	-6.08424	-4.93976	-3.92801
AT4G13830	UC	-1.01165	UC
AT2G29940	-0.773436	-1.01164	UC
AT5G39860	-4.63015	-7.42414	-6.41283
AT5G17650	UC	-1.01104	UC
AT1G16640	-3.39038	-4.64962	-3.63864
AT2G21170	-0.682286	-1.01023	UC
AT1G09070	-1.14957	-1.00996	UC
AT2G25060	-5.66242	-6.6449	-5.63564
AT1G14250	-5.87192	-5.18899	-4.18151
AT1G66980	UC	-1.00719	UC
AT5G14090	UC	-1.00702	UC
AT1G29510	-1.69722	-2.32016	-1.31362
AT1G51610	-0.59767	-1.00619	UC
AT5G27290	-4.04366	-4.84505	-3.83928
AT4G08470	-1.07931	-1.00561	UC
AT1G67090	-3.13149	-3.87696	-2.87152
AT1G62500	-5.52239	-6.1363	-5.13096
AT1G06040	0.899188	UC	1.00509
AT1G79790	-0.572974	-1.005	UC
AT5G16420	UC	1.00854	2.01297
AT2G42230	UC	-1.00435	UC
AT4G23620	UC	UC	1.00248
AT2G41440	UC	UC	1.00166
AT1G76280	UC	UC	1.00056
AT3G59970	UC	-1.00051	UC
AT1G76980	3.12805	3.01051	2.00927
AT3G05760	0.822394	1.00273	UC
AT3G44750	0.800201	1.00282	UC
AT1G04130	0.983463	1.00336	UC
AT3G48190	1.01261	1.00488	UC
AT5G12930	UC	1.00528	UC
AT1G03380	1.08537	1.00537	UC
AT5G51620	1.0137	1.00542	UC
AT1G28330	1.19188	1.00596	UC
AT3G53740	0.953998	1.0064	UC
AT4G21980	1.07703	1.00781	UC
AT5G26610	UC	1.00805	UC
AT5G47640	1.79451	2.65201	1.64394
AT1G54290	UC	1.00943	UC
AT5G26980	UC	1.00987	UC
AT1G47560	UC	1.0101	UC
AT3G52570	0.625131	1.01023	UC
AT3G58160	UC	1.01074	UC
AT5G43740	0.815251	1.01077	UC
AT5G23590	1.0299	1.01098	UC
AT2G41110	-0.994273	UC	-1.01163
AT1G11125	-2.47012	UC	-1.01169
AT4G31990	1.01459	1.01202	UC
AT5G66650	UC	UC	-1.01324
AT1G33790	-2.67106	-2.66621	-3.67971
AT3G27190	UC	UC	-1.01364
AT5G07180	UC	1.01483	UC
AT2G26740	UC	1.01497	UC
AT3G50770	1.70326	1.01552	UC
AT5G02270	UC	1.01656	UC
AT2G27730	0.710384	1.01681	UC
AT2G05710	1.16371	1.01719	UC
AT1G47980	4.73408	5.41811	4.40043
AT5G08305	1.00586	1.01809	UC
AT1G67360	2.41152	3.48186	2.46371
AT1G05750	UC	1.01838	UC
AT4G21020	4.02929	4.86335	3.84484
AT1G16830	1.99576	1.01894	UC
AT2G04230	UC	1.01898	UC
AT5G20960	0.548284	1.01984	UC
AT1G09467	UC	1.01988	UC
AT3G48250	UC	1.02015	UC
AT1G77120	3.32554	3.67073	2.65041
AT1G67500	1.49126	1.02075	UC
AT2G34570	1.51841	1.0209	UC
AT4G27970	UC	-2.37229	-3.3933
AT3G51980	UC	1.02104	UC
AT5G54260	UC	1.02211	UC
AT2G24120	0.987442	1.02267	UC
AT1G61870	0.695949	1.02285	UC
AT3G01050	0.642953	1.0234	UC
AT2G42110	-2.32072	-2.23008	-3.25394
AT4G17030	4.94705	5.71924	4.69507
AT1G65890	3.17382	3.52677	2.5025
AT4G22350	0.436866	1.02519	UC
AT1G27960	UC	UC	-1.02569
AT1G75420	UC	1.02634	UC
AT5G35330	0.907421	1.0276	UC
AT4G10090	1.18348	1.02794	UC
AT2G44300	1.27522	1.02795	UC
AT5G07330	8.1178	8.72057	7.69232
AT2G01870	-0.81809	UC	-1.02836
AT2G06002	UC	1.02936	UC
AT5G62575	0.879664	1.02984	UC
AT5G57300	0.808204	1.02995	UC
AT1G09794	UC	1.03029	UC
AT1G20230	UC	1.03101	UC
AT1G20030	UC	1.0318	UC
AT3G63180	0.831665	1.03213	UC
AT4G36050	UC	1.03277	UC
AT1G79915	1.09483	1.03323	UC
AT1G47570	2.15623	2.64428	1.61053
AT2G17670	0.751921	1.03379	UC
AT5G55400	1.1402	1.03451	UC
AT2G45240	0.803071	1.03458	UC
ATMG01350	UC	2.11472	1.08004
AT4G19900	UC	1.7454	0.71065
AT1G13195	1.19175	1.03483	UC
AT5G22070	UC	1.03485	UC
AT5G06760	8.10131	9.04338	8.00844
AT5G55750	4.3496	5.74978	4.71477
AT3G02832	2.27518	3.51825	2.48299
AT5G41000	UC	UC	-1.03602
AT1G64750	0.768688	1.03608	UC
AT5G05230	0.572912	1.03616	UC
AT5G62770	UC	1.03723	UC
AT4G03600	1.07632	1.03794	UC
AT4G17440	1.536	2.18298	1.14502
AT2G27040	UC	UC	-1.03837
AT2G18050	4.80214	5.64278	4.60432
AT3G61620	1.30339	1.03927	UC
AT1G78865	-5.2058	-3.82147	-4.861
ATMG01170	1.00885	1.03972	UC
AT5G09270	0.782183	1.0402	UC
AT3G57020	2.44219	3.60273	2.56083
AT2G36370	1.5307	1.04205	UC
AT3G19470	0.906118	1.04215	UC
AT3G50860	0.696312	1.04215	UC
AT5G49880	1.18314	1.04229	UC
AT4G24450	1.47927	1.04244	UC
AT2G42540	2.61531	3.56985	2.52628
AT5G66410	0.982246	1.04385	UC
AT4G05440	UC	1.04394	UC
AT5G02100	1.29732	1.04429	UC
AT1G66410	0.740416	1.04431	UC
AT3G63500	0.501301	1.04562	UC
AT4G26240	UC	1.04636	UC
AT1G69270	1.25759	1.91482	0.86828
AT2G07715	UC	1.04664	UC
AT3G02320	0.748783	1.04716	UC
AT5G11770	1.02476	1.04822	UC
AT2G04560	UC	1.04999	UC
AT1G23340	-2.26728	-2.46061	-3.51124
AT5G39710	UC	1.05065	UC
AT4G39360	2.78445	4.55002	3.49776
AT5G04830	0.766469	1.05273	UC
AT5G37485	UC	2.86073	1.80726
AT3G13810	0.8495	1.05374	UC
AT3G12670	1.03535	1.05409	UC
AT2G37970	2.21345	3.46355	2.40919
AT5G19960	UC	1.05567	UC
AT5G41580	UC	1.05568	UC
AT3G15580	1.03293	1.05607	UC
AT1G13810	UC	1.05616	UC
AT2G03620	0.990834	1.05737	UC
AT1G01940	0.761751	1.05759	UC
AT3G51910	-2.09014	-1.6496	-2.70807
AT3G03305	UC	1.05896	UC
AT2G03810	UC	1.06053	UC
AT4G30650	0.779789	1.0606	UC
AT4G31750	0.736852	1.06101	UC
AT5G28460	UC	1.06123	UC
AT2G32295	1.06538	1.06124	UC
AT5G10170	-3.34331	-2.9005	-3.96329
AT4G04223	1.0545	1.06373	UC
AT5G65300	UC	1.06401	UC
AT5G63500	-0.550659	UC	-1.06437
AT1G53760	1.16461	1.06484	UC
[truncated: 1,396 more rows]

## Sheet: Cluster 1
Gene_ ID	Log2FC WT	log2FC 10b	Log2FC OX-1	Gene Name	Annotation /Function
AT1G01660	UC	1.74349	UC	PUB55	Putative U-box domain-containing protein 55; Functions as an E3 ubiquitin ligase.
AT1G01715	UC	1.55317	UC	A0A1P8AM80	Uncharacterized protein.
AT1G02030	UC	2.28063	UC	ZAT1	Zinc finger protein ZAT1; Probable transcription factor that may be involved in stress responses.
AT1G02070	UC	1.82652	UC	T7I23.30	Zinc ion-binding protein.
AT1G02380	-1.92621	UC	-2.6429	T6A9.7	Transmembrane protein.
AT1G02770	2.16892	3.95999	2.48833	F22D16.24	UPF0725 protein At1g02770; Belongs to the UPF0725 (EMB2204) family.
AT1G02800	-3.74306	UC	-3.43109	CEL2	Endoglucanase 1.
AT1G03220	UC	1.78547	UC	F15K9.17	Eukaryotic aspartyl protease family protein; Belongs to the peptidase A1 family.
AT1G03790	UC	5.0975	UC	TZF4	Zinc finger CCCH domain-containing protein 2; Probable transcription repressor that functions as negative regulator of phytochrome-mediated promotion of seed germination. Inhibits seed germinati [...]
AT1G04367	UC	1.53164	UC	- -	- -
AT1G04730	-2.6875	UC	-1.54563	CTF18	P-loop containing nucleoside triphosphate hydrolases superfamily protein.
AT1G04800	-3.15441	UC	-3.08446	F13M7.21	Glycine-rich protein.
AT1G05237	UC	2.42652	UC	- -	- -
AT1G05730	UC	2.05827	UC	F3F20.18	FAM136A-like protein (DUF842).
AT1G06120	UC	1.99854	UC	T21E18.17	Delta-9 desaturase-like 3 protein; Belongs to the fatty acid desaturase type 1 family.
AT1G06227	UC	1.94765	UC	- -	- -
AT1G06250	UC	1.77488	UC	F9P14.11	Phospholipase A1-IIalpha; Acylhydrolase that catalyzes the hydrolysis of phospholipids at the sn-1 position; Belongs to the AB hydrolase superfamily. Lipase family.
AT1G06283	UC	1.61196	UC	- -	- -
AT1G06440	UC	1.9484	UC	F12K11.21	Ubiquitin carboxyl-terminal hydrolase family protein.
AT1G06553	UC	1.82785	UC	- -	- -
AT1G07128	UC	2.32631	UC	- -	- -
AT1G07290	UC	2.6212	UC	GONST2	GDP-mannose transporter GONST2; GDP-mannose transporter that may be involved in the import of GDP-mannose from the cytoplasm into the Golgi lumen. Belongs to the nucleotide-sugar transporter fam [...]
AT1G07370	-4.28685	-3.18673	-5.14846	PCNA	Proliferating cellular nuclear antigen 1; This protein is an auxiliary protein of DNA polymerase delta and is involved in the control of eukaryotic DNA replication by increasing the polymerase's [...]
AT1G07393	UC	2.39887	UC	- -	- -
AT1G07645	UC	2.45956	UC	- -	- -
AT1G07900	3.56855	5.30569	4.14733	LBD1	LOB domain-containing protein 1.
AT1G07985	5.64443	7.21353	4.76331	Q3EDG6_ARATH	Expressed protein.
AT1G08103	UC	2.3405	UC	- -	- -
AT1G08733	UC	2.48366	UC	- -	- -
AT1G09163	UC	2.92509	UC	- -	- -
AT1G09400	UC	2.39219	UC	F14J9.6	Putative 12-oxophytodienoate reductase-like protein 1; Putative oxophytodienoate reductase that may be involved in the biosynthesis or metabolism of oxylipin signaling molecules. Belongs to the [...]
AT1G09500	4.25308	6.49737	4.12428	F14J9.16	NAD(P)-binding Rossmann-fold superfamily protein.
AT1G09787	UC	1.97305	UC	- -	- -
AT1G09950	1.42091	2.98151	UC	RAS1	Protein RESPONSE TO ABA AND SALT 1; Negative regulator of salt (NaCl) tolerance probably by enhancing abscisic acid (ABA) sensitivity.
AT1G10980	-3.07691	UC	-2.51827	T19D16.10	Lung seven transmembrane receptor family protein.
AT1G11125	-2.47012	UC	-1.01169	F4I7D8_ARATH	Uncharacterized protein.
AT1G11303	-1.51253	UC	-1.90648	T28P6.5	G-type lectin S-receptor-like serine/threonine-protein kinase At1g11303.
AT1G11990	UC	1.92462	UC	OFUT2	O-fucosyltransferase 2.
AT1G12280	UC	1.52597	UC	SUMM2	Disease resistance protein SUMM2; Disease resistance protein that mediates defense responses against the bacterial pathogen Pseudomonas syringae pv tomato strain DC3000, and the virulent oomycet [...]
AT1G13970	UC	1.9191	UC	- -	- -
AT1G14430	-3.4816	-1.66185	-3.02855	F14L17.20	Glyoxal oxidase-related protein.
AT1G15050	UC	2.91087	UC	IAA34	Auxin-responsive protein IAA34; Aux/IAA proteins are short-lived transcriptional factors that function as repressors of early auxin response genes at low auxin concentrations. Repression is thou [...]
AT1G15330	UC	4.0671	2.82363	PV42A	SNF1-related protein kinase regulatory subunit gamma-like PV42a; Plays redundant role with PV42b in regulating male gametogenesis and pollen tube guidance.
AT1G15415	UC	2.1772	UC	F9L1.37	Late embryogenesis abundant-like protein.
AT1G16635	UC	1.939	UC	- -	- -
AT1G17560	-2.94989	UC	-4.0024	HLL	50S ribosomal protein HLL, mitochondrial; Binds to 23S rRNA in mitochondrion (By similarity). Required for the formation of the proximal region of the ovule primordium during floral organogenesi [...]
AT1G17630	UC	2.38859	UC	PCMP-E72	Putative pentatricopeptide repeat-containing protein At1g17630; Belongs to the PPR family. PCMP-E subfamily.
AT1G19190	UC	1.61144	UC	CXE1	Probable carboxylesterase 1; Carboxylesterase acting on esters with varying acyl chain length.
AT1G19200	UC	2.64846	UC	FLZ12	FCS-Like Zinc finger 12; May act as an adapter to facilitate the interaction of SnRK1 complex with effector proteins, conferring tissue- and stimulus-type specific differences in the SnRK1 regul [...]
AT1G19396	UC	2.28409	UC	- -	- -
AT1G19397	UC	2.67155	UC	Q3ED94_ARATH	Transmembrane protein.
AT1G24265	UC	1.5684	UC	F4I974_ARATH	BZIP transcription factor, putative (DUF1664).
AT1G24330	UC	2.90962	UC	PUB6	U-box domain-containing protein 6; Functions as an E3 ubiquitin ligase.
AT1G26450	UC	1.79749	UC	T1K7.18	Carbohydrate-binding X8 domain-containing protein.
AT1G27420	UC	2.06113	UC	F17L21.21	Putative F-box/kelch-repeat protein At1g27420.
AT1G27940	-2.11497	UC	-2.15027	ABCB13	ABC transporter B family member 13.
AT1G28540	0.928383	1.85168	UC	F3M18.29	Transmembrane protein.
AT1G29230	UC	2.97908	UC	CIPK18	CBL-interacting serine/threonine-protein kinase 18; CIPK serine-threonine protein kinases interact with CBL proteins. Binding of a CBL protein to the regulatory NAF domain of CIPK protein lead t [...]
AT1G30500	2.82919	4.35834	2.66142	NFYA7	Nuclear transcription factor Y subunit A-7; Stimulates the transcription of various genes by recognizing and binding to a CCAAT motif in promoters; Belongs to the NFYA/HAP2 subunit family.
AT1G30515	-2.1139	UC	-2.77844	Q8L8T4_ARATH	GATA zinc finger protein.
AT1G31840	UC	1.71911	UC	F5M6.15	Putative pentatricopeptide repeat-containing protein At1g31840.
AT1G32880	UC	3.0863	UC	F9L11.34	ARM repeat superfamily protein.
AT1G33102	3.56102	5.15412	3.57477	Q0WN65_ARATH	Uncharacterized protein.
AT1G34245	-1.35877	UC	-2.03087	EPF2	Protein EPIDERMAL PATTERNING FACTOR 2; Controls stomatal patterning. Regulates the number of cells that enter, and remain in, the stomatal lineage by inhibiting protodermal cells from adopting t [...]
AT1G37140	UC	2.71801	UC	MCT1	MEI2 C-terminal RRM only like 1.
AT1G37150	UC	1.7975	UC	HCS2	Biotin--protein ligase 2; Seems to have no or limited implication in biotin-dependent carboxylase biotinylation in planta.
AT1G43765	UC	2.21367	UC	- -	- -
AT1G48405	UC	2.88805	UC	F11A17.4	Kinase-interacting family protein; May be involved in the receptor-like kinase-mediated signal transduction pathway.
AT1G48590	UC	2.42483	UC	CAR5	Protein C2-DOMAIN ABA-RELATED 5; Stimulates the GTPase/ATPase activities of Obg-like ATPases (By similarity). Mediates the transient calcium-dependent interaction of PYR/PYL/RCAR abscisic acid ( [...]
AT1G50110	-2.34562	UC	-3.25155	BCAT6	Branched-chain-amino-acid aminotransferase 6; Converts 2-oxo acids to branched-chain amino acids. Acts on leucine, isoleucine and valine (By similarity).
AT1G50490	-2.58745	UC	-2.10897	UBC20	Ubiquitin-conjugating enzyme E2 20; Accepts the ubiquitin from the E1 complex and catalyzes its covalent attachment to other proteins; Belongs to the ubiquitin-conjugating enzyme family.
AT1G50520	UC	1.85938	UC	CYP705A27	Cytochrome P450, family 705, subfamily A, polypeptide 27; Belongs to the cytochrome P450 family.
AT1G51380	UC	2.09233	UC	RH34	DEAD-box ATP-dependent RNA helicase 34; ATP-dependent RNA helicase involved in 40S ribosomal subunit biogenesis. Required for the processing and cleavage of 35S pre-rRNA at sites A0, A1, and A2, [...]
AT1G52100	UC	1.99854	UC	JAL11	Jacalin-related lectin 11.
AT1G52565	UC	4.06923	2.10439	A0JPU2_ARATH	Cytochrome P450 family protein.
AT1G53680	UC	2.21858	UC	GSTU28	Glutathione S-transferase U28; May be involved in the conjugation of reduced glutathione to a wide number of exogenous and endogenous hydrophobic electrophiles and have a detoxification role aga [...]
AT1G54540	UC	1.98147	UC	F20D21.35	Late embryogenesis abundant (LEA) hydroxyproline-rich glycoprotein family.
AT1G55050	UC	2.41124	UC	T7N22.1	Uncharacterized protein.
AT1G55990	1.63384	3.55674	UC	F14J16.30	Glycine-rich protein.
AT1G56210	-2.01824	UC	-1.41299	HIPP35	Heavy metal-associated isoprenylated plant protein 35; Heavy-metal-binding protein.
AT1G56610	UC	3.72424	UC	F25P12.94	F-box protein At1g56610; Component of SCF(ASK-cullin-F-box) E3 ubiquitin ligase complexes, which may mediate the ubiquitination and subsequent proteasomal degradation of target proteins.
AT1G57590	4.15463	5.87183	4.76849	PAE2	Pectin acetylesterase 2; Hydrolyzes acetyl esters in homogalacturonan regions of pectin. In type I primary cell wall, galacturonic acid residues of pectin can be acetylated at the O-2 and O-3 po [...]
AT1G59860	-2.00118	UC	-1.4859	HSP17.6A	17.6 kDa class I heat shock protein 1; Possesses chaperone activity.
AT1G61340	UC	1.71707	UC	FBS1	F-box protein At1g61340.
AT1G61450	-3.63238	UC	-4.10899	T1F9.6	CAP-gly domain linker.
AT1G61590	UC	2.17307	UC	PBL15	Probable serine/threonine-protein kinase PBL15; May be involved in plant defense signaling.
AT1G61800	UC	5.2641	4.03971	GPT2	Glucose-6-phosphate/phosphate translocator 2, chloroplastic; Glucose 6-phosphate (Glc6P) transporter. Transports also inorganic phosphate, 3-phosphoglycerate, triose phosphates and, to a leser e [...]
AT1G63245	UC	2.82947	1.76407	CLE14	CLAVATA3/ESR (CLE)-related protein 14; Extracellular signal peptide that regulates cell fate. Represses root apical meristem maintenance. Acts as an elicitor of the root meristem differentiation [...]
AT1G63570	UC	1.9562	UC	CRRSP7	Putative cysteine-rich repeat secretory protein 7.
AT1G64010	UC	2.17307	UC	F22C12.29	Serine protease inhibitor (SERPIN) family protein; Belongs to the serpin family.
AT1G64320	UC	3.09419	UC	F15H21.20	Myosin heavy chain-like protein.
AT1G64405	UC	2.72991	UC	Q3ECI5_ARATH	At1g64405.
AT1G64795	UC	3.36672	UC	A0A1P8APL7	Uncharacterized protein.
AT1G64820	UC	2.42016	UC	DTX7	Protein DETOXIFICATION 7.
AT1G65120	UC	2.39842	UC	T23K8.3	Ubiquitin carboxyl-terminal hydrolase-related protein.
AT1G66020	UC	2.43814	UC	TPS26	Terpenoid synthase 26; Involved in terpene biosynthesis in roots. Possesses sesquiterpene (C15) synthase activity and diterpene (C20) synthase activity in vitro; Belongs to the terpene synthase [...]
AT1G66390	5.10608	6.93804	4.37167	MYB90	Transcription factor MYB90; Transcription activator, when associated with BHLH12/MYC1, EGL3, or GL3. Promotes the synthesis of phenylpropanoid-derived compounds such as anthocyanins.
AT1G66550	UC	2.3405	UC	WRKY67	Probable WRKY transcription factor 67; Transcription factor. Interacts specifically with the W box (5'-(T)TGAC[CT]-3'), a frequently occurring elicitor-responsive cis- acting element (By similar [...]
AT1G66620	-1.99626	UC	-2.29669	T12I7.7	E3 ubiquitin-protein ligase SINA-like 2; E3 ubiquitin-protein ligase that mediates ubiquitination and subsequent proteasomal degradation of target proteins. E3 ubiquitin ligases accept ubiquitin [...]
AT1G66700	UC	2.26136	UC	PXMT1	Paraxanthine methyltransferase 1; Methyltransferase that may methylate 1,7-paraxanthine. Prevents seed germination and modulates root architecture during early seedlings development. Plays a min [...]
AT1G67020	UC	1.74932	UC	F1O19.7	Transmembrane protein.
AT1G67025	UC	1.68335	UC	F4HQ34_ARATH	Wall-associated receptor kinase carboxy-terminal protein.
AT1G67035	-3.23181	UC	-3.20291	F1O19.9	Homeobox Hox-B3-like protein.
AT1G67820	UC	1.76373	UC	F12A21.5	Probable protein phosphatase 2C 14.
AT1G67920	4.26731	5.54503	3.79571	T23K23.23	At1g67920.
AT1G68320	UC	2.46011	UC	MYB62	Transcription factor MYB62; Transcription repressor of phosphate (Pi) starvation-induced genes. Regulates negatively Pi starvation responses via the repression of gibberellic acid (GA) biosynthe [...]
AT1G68470	UC	2.01996	0.883662	GT17	Probable xyloglucan galactosyltransferase GT17; Functions in xyloglucan synthesis by adding side chains to the xylosylated glucan backbone. Involved in the galactosylation of hemicellulose xylog [...]
AT1G68640	UC	2.80583	UC	PAN	Transcription factor PERIANTHIA; Transcriptional activator involved in the determination of floral organ number. Acts to determine floral organ patterning by establishing floral organ primordia [...]
AT1G68700	UC	1.66253	UC	F24J5.7	Transmembrane protein.
AT1G68765	UC	4.24349	2.53882	IDA	Protein IDA; Involved in an ethylene-independent separation step of floral abscission. Promotes abscission zone (AZ) cells rounding. May act with RLK5 and HSL2 as ligand-receptor pairs.
AT1G68795	UC	2.15974	UC	CLE12	CLAVATA3/ESR (CLE)-related protein 12; Extracellular signal peptide that regulates cell fate. Represses root apical meristem maintenance. Belongs to the CLV3/ESR signal peptide family.
AT1G69930	UC	3.03895	UC	GSTU11	Glutathione S-transferase U11; May be involved in the conjugation of reduced glutathione to a wide number of exogenous and endogenous hydrophobic electrophiles and have a detoxification role aga [...]
AT1G70360	UC	2.15092	UC	F17O7.10	F-box protein At1g70360.
AT1G70650	UC	1.65701	UC	F5A18.17	Ran BP2/NZF zinc finger-like superfamily protein.
AT1G71330	1.92549	2.93249	0.922688	NAP5	Probable non-intrinsic ABC protein 5.
AT1G72240	UC	1.98529	UC	T9N14.5	Uncharacterized protein T9N14.5.
AT1G72260	UC	1.76475	UC	THI2.1	Acidic protein; Seems to function as a defense factor. Thionins are small plant proteins which are toxic to animal cells. They seem to exert their toxic effect at the level of the cell membrane. [...]
AT1G72720	UC	1.54148	UC	F28P22.9	At1g72720.
AT1G75300	UC	1.51629	UC	F22H5.16	NmrA-like negative transcriptional regulator family protein.
AT1G75600	UC	4.12043	UC	F10A5.19	Histone H3-like 3; Core component of nucleosome. Nucleosomes wrap and compact DNA into chromatin, limiting DNA accessibility to the cellular machineries which require DNA as a template. Histones [...]
AT1G76210	UC	2.36287	UC	T23E18.14	DUF241 domain protein, putative (DUF241).
AT1G76470	UC	3.62768	UC	F14G6.7	NAD(P)-binding Rossmann-fold superfamily protein.
AT1G77880	UC	2.365	UC	F28K19.9	Putative F-box protein At1g77880.
AT1G79490	UC	1.57351	UC	EMB2217	Pentatricopeptide repeat-containing protein At1g79490, mitochondrial.
AT1G79780	UC	1.62944	UC	F20B17.26	CASP-like protein 3A2; Belongs to the Casparian strip membrane proteins (CASP) family.
AT1G80150	0.920476	1.75797	UC	F18B13.23	Pentatricopeptide repeat-containing protein At1g80150, mitochondrial.
AT2G01021	UC	2.85083	UC	B3H4D4_ARATH	Uncharacterized protein.
AT2G01410	UC	2.29976	UC	F10A8.30	NHL domain-containing protein.
AT2G01690	UC	1.76989	UC	VAC14	Protein VAC14 homolog; The PI(3,5)P2 regulatory complex regulates both the synthesis and turnover of phosphatidylinositol 3,5-bisphosphate (PtdIns(3,5)P2). Regulates the synthesis of PtdIns(3,5) [...]
AT2G02700	UC	2.56393	UC	T20F6.16	Cysteine/Histidine-rich C1 domain family protein.
AT2G04190	UC	3.78924	UC	T16B23.4	TRAF-like family protein.
AT2G04205	-2.53911	UC	-2.73026	- -	- -
AT2G05440	0.754945	1.8896	UC	ATGRP9	Putative glycine-rich protein.
AT2G05655	UC	1.76989	UC	A0A1P8B1D7	Uncharacterized protein.
AT2G07654	UC	1.94599	UC	A0A1P8B2V1	Uncharacterized protein.
AT2G07658	UC	2.58068	UC	A0A1P8B2V7	Uncharacterized protein.
AT2G07672	UC	2.27096	UC	M1050_ARATH	Uncharacterized mitochondrial protein AtMg01050.
AT2G07768	UC	1.69787	UC	F4IL90_ARATH	Cytochrome C assembly protein.
AT2G07795	UC	1.60928	UC	Q2V491_ARATH	Transmembrane protein.
AT2G08315	UC	2.335	UC	- -	- -
AT2G08905	UC	3.0701	UC	- -	- -
AT2G09815	UC	3.81664	UC	- -	- -
AT2G09845	UC	2.7256	UC	- -	- -
AT2G11522	UC	2.16243	UC	B3H5F5_ARATH	Uncharacterized protein.
AT2G11891	UC	2.49759	UC	B3H5I2_ARATH	Uncharacterized protein.
AT2G14580	-2.93633	UC	-1.74686	PRB1	Pathogenesis-related protein 1; Probably involved in the defense reaction of plants against pathogens.
AT2G14620	UC	2.33555	UC	XTH10	Probable xyloglucan endotransglucosylase/hydrolase protein 10; Catalyzes xyloglucan endohydrolysis (XEH) and/or endotransglycosylation (XET). Cleaves and religates xyloglucan polymers, an essent [...]
AT2G15440	UC	1.78074	UC	F26H6.4	Polysaccharide biosynthesis protein (DUF579).
AT2G15950	UC	1.76989	UC	- -	- -
AT2G18370	UC	2.55652	UC	LTP8	Non-specific lipid-transfer protein 8; Plant non-specific lipid-transfer proteins transfer phospholipids as well as galactolipids across membranes. May play a role in wax or cutin deposition in [...]
AT2G18550	2.0781	4.01816	2.58417	ATHB-21	Homeobox-leucine zipper protein ATHB-21; Probable transcription factor; Belongs to the HD-ZIP homeobox family. Class I subfamily.
AT2G19320	UC	3.31945	UC	F27F23.12	At2g19320.
AT2G19660	-2.83959	UC	-4.08741	A0A1P8AY40	Cysteine/Histidine-rich C1 domain family protein.
AT2G20562	-2.76729	UC	-4.47118	TAX2	Signaling peptide TAXIMIN 2; Signaling peptide involved in the regulation of lateral organs separation.
AT2G20870	-6.79248	UC	-6.98818	F5H14.16	Putative cell wall protein.
AT2G21420	UC	1.78291	UC	F3K23.18	RBR-type E3 ubiquitin transferase.
AT2G21820	7.33892	8.84338	7.22152	Q9SJ17_ARATH	Seed maturation protein.
AT2G22140	-1.62676	UC	-2.57605	EME1B	Crossover junction endonuclease EME1B; Interacts with MUS81 to form a DNA structure-specific endonuclease with substrate preference for branched DNA structures with a 5'-end at the branch nick. [...]
AT2G22470	UC	3.27818	UC	AGP2	Classical arabinogalactan protein 2; Proteoglycan that seems to be implicated in diverse developmental roles such as differentiation, cell-cell recognition, embryogenesis and programmed cell dea [...]
AT2G23640	UC	2.64574	UC	RTNLB13	Reticulon-like protein B13.
AT2G23945	UC	1.51629	UC	Q8S8N7_ARATH	Eukaryotic aspartyl protease family protein; Belongs to the peptidase A1 family.
AT2G24190	UC	2.29074	UC	SDR2b	Short-chain dehydrogenase/reductase 2b; Aldehyde reductase that catalyzes the reduction of the aldehyde carbonyl groups on saturated and alpha,beta-unsaturated aldehydes with more than 5 carbons [...]
AT2G24700	-3.25657	UC	-3.04483	REM10	B3 domain-containing protein REM10.
AT2G25240	UC	1.76989	UC	CCP3	Serpin-Z10; Probable serine protease inhibitor; Belongs to the serpin family.
AT2G25270	-1.99778	UC	-2.66963	T22F11.14	Transmembrane protein.
AT2G27220	UC	1.72194	UC	BLH5	BEL1-like homeodomain protein 5.
AT2G27550	UC	3.3517	UC	CEN	Protein CENTRORADIALIS-like; May form complexes with phosphorylated ligands by interfering with kinases and their effectors (By similarity). Can substitute for TERMINAL FLOWER 1 (in vitro); Belo [...]
AT2G27670	UC	1.59526	UC	F15K20.23	Uncharacterized protein.
AT2G27690	-2.0142	UC	-2.34686	CYP94C1	Cytochrome P450 94C1; Involved in the oxidation of the plant hormone jasmonoyl-L- isoleucine (JA-Ile), a bioactive phytohormone of the jasmonate-mediated signaling pathway. Converts 12-hydroxy-J [...]
AT2G28210	-2.88437	UC	-4.56264	ACA2	Alpha carbonic anhydrase 2; Reversible hydration of carbon dioxide.
AT2G28426	UC	2.48694	UC	B3H5L8_ARATH	Uncharacterized protein.
AT2G29460	UC	4.62209	2.94406	GSTU4	Glutathione S-transferase U4; May be involved in the conjugation of reduced glutathione to a wide number of exogenous and endogenous hydrophobic electrophiles and have a detoxification role agai [...]
AT2G29680	-2.68368	UC	-3.80799	CDC6	Cell division control protein 6 homolog; May be involved in the initiation of DNA replication. May play a role in endoreduplication. Could act as one of the factors that contributes to maintain [...]
AT2G30300	UC	2.17307	UC	T9D9.11	Major facilitator superfamily protein.
AT2G30432	-5.21671	UC	-5.64008	TCL1	MYB-like transcription factor TCL1; MYB-type transcription factor involved in trichome cell specification. Acts as a negative regulator of trichome patterning and formation by direct binding to [...]
AT2G30460	UC	1.6491	UC	UXT2	UDP-xylose transporter 2; Nucleotide-sugar transporter that transports UDP-xylose and UMP in a strict counter-exchange mode; Belongs to the TPT transporter family. TPT (TC 2.A.7.9) subfamily.
AT2G30690	UC	1.93736	UC	MYOB4	Probable myosin-binding protein 4; Membrane-anchored myosin receptors that define a distinct, plant-specific transport vesicle compartment.
AT2G30770	UC	5.98198	UC	CYP71A13	Indoleacetaldoxime dehydratase; Involved in the biosynthesis of the indole-derived phytoalexin camalexin. Catalyzes the conversion of indole-3- acetaldoxime to indole-3-acetonitrile. Required fo [...]
AT2G32765	-1.33472	UC	-1.74019	SUMO5	Small ubiquitin-related modifier 5; Ubiquitin-like protein which can be covalently attached to target lysines as a monomer. Does not seem to be involved in protein degradation and may function a [...]
AT2G34030	UC	2.56393	UC	T14G11.15	Calcium-binding EF-hand family protein.
AT2G34360	-2.67613	-1.68176	-3.43745	DTX15	Protein DETOXIFICATION 15.
AT2G35075	UC	4.16463	UC	F4IIZ5_ARATH	Uncharacterized protein.
AT2G35090	UC	1.51629	UC	T4C15.24	Transmembrane protein, putative (DUF1640).
AT2G35300	7.68691	9.0204	6.91341	LEA18	Late embryogenesis abundant protein 18; Involved dehydration tolerance. Involved in the adaptive response of vascular plants to withstand water deficit. May possess chaperone-like activity under [...]
AT2G35859	UC	2.44925	UC	- -	- -
AT2G35980	UC	3.48137	UC	NHL10	NDR1/HIN1-like protein 10; May play a role in plant immunity.
AT2G36750	UC	4.03608	UC	UGT73C1	UDP-glycosyltransferase 73C1; Involved in the O-glucosylation of trans-zeatin and dihydrozeatin. Also active in vitro on cis-zeatin, dihydrozeatin-9-N- Glc, and olomoucine. Can detoxify the expl [...]
AT2G37560	-2.88678	UC	-3.75597	ORC2	Origin of replication complex subunit 2; Essential protein. Component of the origin recognition complex (ORC) that binds origins of replication. DNA- binding is ATP-dependent, however specific D [...]
AT2G38185	UC	1.90801	UC	APD1	E3 ubiquitin-protein ligase APD1; Involved in pollen mitosis II (PMII) regulation during male gametogenesis.
AT2G39240	UC	3.82612	UC	T16B24.12	RNA polymerase I specific transcription initiation factor RRN3 family protein.
AT2G41178	UC	3.67616	UC	- -	- -
AT2G41730	-1.94239	UC	-1.96073	T11A7.17	Calcium-binding site protein.
AT2G42247	UC	2.18047	UC	- -	- -
AT2G42860	UC	1.53403	UC	F7D19.14	Expressed protein.
AT2G42990	-2.86059	UC	-2.46557	F23E6.2	GDSL esterase/lipase At2g42990.
AT2G45220	UC	1.92758	UC	PME17	Probable pectinesterase/pectinesterase inhibitor 17; Acts in the modification of cell walls via demethylesterification of cell wall pectin; In the C-terminal section; belongs to the pectinestera [...]
AT2G46572	UC	1.93736	UC	- -	- -
AT2G46940	2.67369	4.10029	2.38986	F14M4.23	Fold protein.
AT2G47460	UC	1.57923	UC	MYB12	Transcription factor MYB12; Flavonol-specific transcription activator involved in the regulation of several genes of flavonoid biosynthesis. Activates the expression of CHS, CHI, F3H and FLS1. C [...]
AT2G47770	9.88286	10.8413	8.90275	TSPO	Translocator protein homolog; Stress-induced membrane protein that can bind heme and may play
AT3G01600	-2.71117	UC	-2.28025	NAC044	NAC domain containing protein 44.
AT3G02310	UC	3.63432	UC	2002-09-01	Developmental protein SEPALLATA 2; Probable transcription factor. Functions with SEPALLATA1/AGL2 and SEPALLATA3/AGL9 to ensure proper development of petals, stamens and carpels and to prevent th [...]
AT3G02590	UC	2.30205	UC	HDF7	Putative Delta(7)-sterol-C5(6)-desaturase 2; Belongs to the sterol desaturase family.
AT3G02990	1.31174	2.86722	1.08118	HSFA1E	Heat stress transcription factor A-1e; Transcriptional activator that specifically binds DNA sequence 5'-AGAAnnTTCT-3' known as heat shock promoter elements (HSE).
AT3G03450	UC	3.1296	UC	RGL2	DELLA protein RGL2; Probable transcriptional regulator that acts as a repressor of the gibberellin (GA) signaling pathway. No effect of the BOI proteins on its stability. Probably acts by partic [...]
AT3G03776	UC	2.27535	UC	A0A1I9LP11	Hydroxyproline-rich glycoprotein family protein.
AT3G04184	0.973187	1.89914	UC	B3H617_ARATH	Uncharacterized protein.
AT3G04775	UC	2.4094	UC	- -	- -
AT3G05740	-3.05321	UC	-2.90005	RECQL1	ATP-dependent DNA helicase Q-like 1; 3'-5' DNA helicase that may play a role in the repair of DNA. Belongs to the helicase family. RecQ subfamily.
AT3G07075	UC	2.38329	UC	- -	- -
AT3G08275	UC	2.02043	UC	- -	- -
AT3G08700	UC	3.47212	UC	UBC12	Probable ubiquitin-conjugating enzyme E2 12; Accepts the ubiquitin from the E1 complex and catalyzes its covalent attachment to other proteins; Belongs to the ubiquitin-conjugating enzyme family.
AT3G09040	UC	1.76557	UC	PCMP-E88	Pentatricopeptide repeat-containing protein At3g09040, mitochondrial.
AT3G09080	-2.77359	UC	-2.97144	A0A1I9LSE8	Transducin/WD40 repeat-like superfamily protein.
AT3G09162	0.733982	2.13271	UC	Q8GYI0_ARATH	At3g09162.
AT3G09855	UC	2.88365	UC	- -	- -
AT3G10340	UC	1.69674	UC	PAL4	Phenylalanine ammonia-lyase 4; This is a key enzyme of plant metabolism catalyzing the first reaction in the biosynthesis from L-phenylalanine of a wide variety of natural products based on the [...]
AT3G10815	UC	2.60516	UC	- -	- -
AT3G12070	UC	2.32632	UC	RGTB2	Geranylgeranyl transferase type-2 subunit beta 2; Catalyzes the transfer of a geranylgeranyl moiety from geranylgeranyl diphosphate to both cysteines of Rab proteins with the C-terminal sequence [...]
AT3G13170	UC	2.31368	UC	SPO11-1	Meiotic recombination protein SPO11-1; Component of a topoisomerase 6 complex specifically required for meiotic recombination. Together with MTOPVIB, mediates DNA cleavage that forms the double- [...]
AT3G13672	3.78039	5.3534	3.87063	SINAT6	Probable inactive E3 ubiquitin-protein ligase SINAT6; Probable inactive E3 ubiquitin-protein ligase that plays a role in regulation of autophagy. Upon starvation, involved in maintaining ATG6 ho [...]
AT3G13950	UC	2.05451	UC	B9DG91_ARATH	AT3G13950 protein.
AT3G14670	UC	1.93736	UC	Q9LUC7_ARATH	Uncharacterized protein.
AT3G14680	UC	1.68986	UC	CYP72A14	Cytochrome P450 72A14; Belongs to the cytochrome P450 family.
AT3G14850	-3.02034	UC	-2.954	TBL41	Protein trichome birefringence-like 41; May act as a bridging protein that binds pectin and other cell wall polysaccharides. Probably involved in maintaining esterification of pectins (By simila [...]
AT3G15357	3.3048	5.77872	3.91819	Q8LDR8_ARATH	Phosphopantothenoylcysteine decarboxylase subunit.
AT3G16360	1.27535	3.03767	1.54904	AHP4	Histidine-containing phosphotransfer protein 4; Functions as two-component phosphorelay mediators between cytokinin sensor histidine kinases and response regulators (B-type ARRs). Plays an impor [...]
AT3G17520	9.18524	11.5123	8.93199	F4J573_ARATH	Late embryogenesis abundant protein (LEA) family protein.
AT3G22840	4.3447	6.44386	4.63031	ELIP1	Early light-induced protein 1, chloroplastic; Prevents excess accumulation of free chlorophyll by inhibiting the entire chlorophyll biosynthesis pathway (e.g. 5- aminolevulinate synthesis and Mg [...]
AT3G22910	UC	2.73117	1.65486	ACA13	Putative calcium-transporting ATPase 13, plasma membrane-type; This magnesium-dependent enzyme catalyzes the hydrolysis of ATP coupled with the translocation of calcium from the cytosol out of t [...]
AT3G24730	UC	1.5761	UC	Q6NMD4_ARATH	mRNA splicing factor, thioredoxin-like U5 snRNP.
AT3G25060	UC	2.43814	UC	PCMP-E96	Putative pentatricopeptide repeat-containing protein At3g25060, mitochondrial.
AT3G25990	UC	1.52717	UC	GT-4	Trihelix transcription factor GT-4; Probable transcription factor that binds specific DNA sequence.
AT3G26320	-2.70838	UC	-4.34087	CYP71B36	Cytochrome P450 71B36; Belongs to the cytochrome P450 family.
AT3G26550	-3.16591	UC	-3.33609	Q9LRV1_ARATH	Cysteine/Histidine-rich C1 domain family protein.
AT3G26747	UC	2.41342	UC	- -	- -
AT3G26830	UC	2.39981	UC	CYP71B15	Bifunctional dihydrocamalexate synthase/camalexin synthase; Multifunctional enzyme involved in the biosynthesis of the indole-derived phytoalexin camalexin. Catalyzes two reactions, the formatio [...]
AT3G27970	-2.24648	UC	-3.93217	B3LFC1_ARATH	Exonuclease family protein.
AT3G42725	-4.56591	-2.83291	-4.2156	Q949S3_ARATH	Putative membrane lipoprotein.
AT3G44120	UC	1.60263	UC	F26G5.70	F-box/kelch-repeat protein At3g44120.
AT3G44550	UC	3.34476	UC	FAR5	Probable fatty acyl-CoA reductase 5; Catalyzes the reduction of fatty acyl-CoA to fatty alcohols. Catalyzes specifically the formation of C18:0 fatty alcohol. Provides the fatty alcohols require [...]
AT3G44665	UC	2.22411	UC	A0A1I9LQL8	Tyrosine phosphatase.
AT3G46660	UC	2.79724	UC	UGT76E12	Flavonol 3-O-glucosyltransferase UGT76E12; Possesses quercetin 3-O-glucosyltransferase and 7-O- glucosyltransferase activities in vitro.
AT3G47347	UC	1.6956	UC	- -	- -
AT3G48020	3.21624	4.95175	3.641	T17F15.110	At3g48020.
AT3G48090	-1.72089	UC	-1.1381	EDS1	Protein EDS1; Positive regulator of basal resistance and of effector- triggered immunity specifically mediated by TIR-NB-LRR (TNL) resistance proteins. Disruption by bacterial effector of EDS1-T [...]
AT3G48790	UC	2.3949	UC	F4JF53_ARATH	Pyridoxal phosphate (PLP)-dependent transferases superfamily protein.
AT3G48850	UC	3.50857	2.29855	MPT2	Mitochondrial phosphate carrier protein 2, mitochondrial; Transport of phosphate groups from the cytosol to the mitochondrial matrix. Mediates salt stress tolerance through an ATP- dependent pat [...]
AT3G48920	UC	1.9137	UC	T2J13.240	MYB transcription factor.
AT3G49620	-4.0792	UC	-3.49913	DIN11	Probable 2-oxoglutarate-dependent dioxygenase DIN11.
AT3G49950	-2.46528	UC	-3.59819	SCL32	Scarecrow-like protein 32; Probable transcription factor involved in plant development. Belongs to the GRAS family.
AT3G52160	UC	2.61812	UC	KCS15	3-ketoacyl-CoA synthase 15.
AT3G54160	UC	2.04016	UC	F24B22.120	RNI-like superfamily protein.
AT3G54770	-2.77346	UC	-2.73701	ARP1-2	Probable RNA-binding protein ARP1; Probable RNA-binding protein involved in the regulation of abscisic acid (ABA) response during seed germination. May regulate transcript levels of several germ [...]
AT3G56030	UC	1.67164	UC	F27K19_210	Pentatricopeptide repeat-containing protein At3g56030, mitochondrial.
AT3G56260	UC	1.85189	UC	Q6NLT4_ARATH	At3g56260.
AT3G56890	UC	2.73865	UC	T8M16_220	F-box associated ubiquitination effector family protein.
AT3G61410	1.66158	3.36264	1.90578	A0A1I9LQ28	U-box kinase family protein.
AT3G62270	UC	2.63713	UC	BOR2	Probable boron transporter 2; Probable boron transporter. Boron is essential for maintaining the integrity of plants cell walls (By similarity). Belongs to the anion exchanger (TC 2.A.31.3) fami [...]
AT3G63040	UC	2.37817	UC	T20O10_140	At3g63040.
AT3G63050	UC	2.35068	UC	F4IZM5_ARATH	Uncharacterized protein.
AT4G01420	UC	2.67203	UC	CBL5	Calcineurin B-like protein 5; Acts as a calcium sensor. CBL proteins interact with CIPK serine-threonine protein kinases. Binding of a CBL protein to the regulatory NAF domain of a CIPK protein [...]
AT4G02555	UC	2.95004	UC	- -	- -
AT4G02830	UC	2.30535	UC	T5J8.15	Uncharacterized protein AT4g02830.
AT4G03330	-2.22175	UC	-2.95971	SYP123	Syntaxin-123; Vesicle trafficking protein that functions in the secretory pathway.
AT4G03725	UC	2.4268	UC	- -	- -
AT4G04077	UC	1.9137	UC	- -	- -
AT4G04180	UC	1.79527	UC	T27D20.13	P-loop containing nucleoside triphosphate hydrolases superfamily protein; Belongs to the AAA ATPase family.
AT4G04450	-3.16669	UC	-1.36447	WRKY42	WRKY transcription factor 42; Transcription factor. Interacts specifically with the W box (5'-(T)TGAC[CT]-3'), a frequently occurring elicitor-responsive cis- acting element (By similarity). Mod [...]
AT4G04475	1.27662	3.14532	UC	- -	- -
AT4G05631	UC	1.82896	UC	F4JGI3_ARATH	Uncharacterized protein.
AT4G06250	UC	2.0029	UC	- -	- -
AT4G06320	UC	2.31357	UC	- -	- -
AT4G06795	UC	2.14593	UC	- -	- -
AT4G06935	UC	2.90328	UC	- -	- -
AT4G06945	UC	3.24563	1.5208	- -	- -
AT4G07465	UC	2.92521	UC	- -	- -
AT4G08325	UC	2.61675	UC	- -	- -
AT4G08505	UC	1.88734	UC	- -	- -
AT4G09300	UC	1.93736	UC	T30A10.60	LisH and RanBPM domains containing protein.
AT4G09750	UC	2.40569	UC	F17A8.100	NAD(P)-binding Rossmann-fold superfamily protein.
AT4G10040	0.621141	1.8326	UC	CYTC-2	Cytochrome c-2; Electron carrier protein. The oxidized form of the cytochrome c heme group can accept an electron from the heme group of the cytochrome c1 subunit of cytochrome reductase. Cytoch [...]
AT4G10560	-2.49081	UC	-2.28172	F3H7.4	Cysteine/Histidine-rich C1 domain family protein.
AT4G10843	UC	1.76685	UC	A0A1P8B5G1	Uncharacterized protein.
AT4G11480	UC	2.01297	UC	CRK32	Putative cysteine-rich receptor-like protein kinase 32.
AT4G11880	UC	3.9628	UC	AGL14	Agamous-like MADS-box protein AGL14; Transcriptional activator that regulates root development by controlling meristem size and patterning of the root apical meristem. Regulates auxin transport [...]
AT4G12382	2.08568	3.98704	1.39509	T1P17-2	F-box protein At4g12382.
AT4G12735	UC	2.08722	UC	Q8LCC1_ARATH	At4g12735.
AT4G13680	UC	1.9137	UC	F18A5.70	Uncharacterized protein AT4g13680.
AT4G14770	-3.27424	UC	-2.21716	TCX2	Protein tesmin/TSO1-like CXC 2; Plays a role in development of both male and female reproductive tissues; Belongs to the lin-54 family.
AT4G15563	UC	2.01186	UC	A0A1P8B5C8	F-box-like protein.
AT4G16748	UC	2.79168	UC	- -	- -
AT4G16940	UC	1.63443	UC	Dl4500c	Disease resistance protein (TIR-NBS-LRR class) family.
AT4G18510	UC	2.44828	UC	CLE2	CLAVATA3/ESR (CLE)-related protein 2; Extracellular signal peptide that regulates cell fate. May act with CLV1 as a ligand-receptor pair in a signal transduction pathway, coordinating growth bet [...]
AT4G18596	UC	1.51629	UC	F28J12.250-2	Pollen-specific protein-like At4g18596.
AT4G18890	UC	1.67714	UC	BEH3	BES1/BZR1 homolog protein 3.
AT4G19900	UC	1.7454	0.71065	F18F4.6-2	Uncharacterized protein At4g19900.
AT4G21440	UC	2.55654	UC	MYB102	Transcription factor MYB102; Probable transcription factor that may function in osmotic stress and wounding signaling pathways (Probable). Contributes to basal resistance against the herbivore P [...]
AT4G21490	UC	2.67203	UC	NDB3	External alternative NAD(P)H-ubiquinone oxidoreductase B3, mitochondrial; Alternative NADH-ubiquinone oxidoreductase which catalyzes the oxidation of mitochondrial NADH does not translocate prot [...]
AT4G23590	UC	2.39219	UC	F9D16.60	Probable aminotransferase TAT4.
AT4G24010	1.23682	2.51818	UC	CSLG1	Cellulose synthase-like protein G1; Thought to be a Golgi-localized beta-glycan synthase that polymerize the backbones of noncellulosic polysaccharides (hemicelluloses) of plant cell wall.
AT4G24420	UC	2.48659	UC	T22A6.250	RNA-binding (RRM/RBD/RNP motifs) family protein.
AT4G24970	-1.76495	UC	-1.50358	MORC7	Protein MICRORCHIDIA 7; Exhibits ATPase activity. Binds DNA/RNA in a non-specific manner and exhibits endonuclease activity. Probably involved in DNA repair. Involved in RNA-directed DNA methyla [...]
AT4G25380	UC	2.74289	UC	SAP10	Zinc finger A20 and AN1 domain-containing stress-associated protein 10; May be involved in environmental stress response.
AT4G25950	UC	1.57831	UC	VHA-G3	V-type proton ATPase subunit G3; Catalytic subunit of the peripheral V1 complex of vacuolar ATPase (V-ATPase). V-ATPase is responsible for acidifying a variety of intracellular compartments in e [...]
AT4G26220	UC	2.07131	UC	T25K17.30	Probable caffeoyl-CoA O-methyltransferase At4g26220; Methylates caffeoyl-CoA to feruloyl-CoA and 5- hydroxyferuloyl-CoA to sinapoyl-CoA. Plays a role in the synthesis of feruloylated polysacchar [...]
AT4G26890	UC	2.38313	UC	MAPKKK16	Mitogen-activated protein kinase kinase kinase 16; Belongs to the protein kinase superfamily.
AT4G27510	-2.08358	UC	-2.89414	F27G19.110	2-isopropylmalate synthase.
AT4G27530	UC	2.98647	UC	T29A15.20	At4g27530.
AT4G27852	UC	3.05759	UC	- -	- -
AT4G28050	-2.30225	UC	-1.52836	TET7	Tetraspanin-7; May be involved in the regulation of cell differentiation. Belongs to the tetraspanin (TM4SF) family.
AT4G28380	UC	1.88466	UC	F20O9.70	Leucine-rich repeat (LRR) family protein.
AT4G28430	-3.82941	UC	-1.84974	RTNLB18	Reticulon-like protein B18.
AT4G28460	UC	2.69214	UC	PIP1	PAMP-induced secreted peptide 1; Endogenous secreted peptide that acts as elicitor of immune response and positive regulator of defense response. Amplifies the immune response triggered by flg22 [...]
AT4G29540	UC	1.54247	UC	LPXA	Probable acyl-[acyl-carrier-protein]--UDP-N-acetylglucosamine O-acyltransferase, mitochondrial; Involved in the biosynthesis of lipid A, a phosphorylated glycolipid that in bacteria anchors the [...]
AT4G31248	UC	1.8533	UC	- -	- -
AT4G31398	UC	2.14959	UC	- -	- -
AT4G31405	UC	2.89475	UC	A0A1P8B3I7	Uncharacterized protein.
AT4G33467	UC	4.14319	UC	Q570U1_ARATH	Uncharacterized protein.
AT4G34131	UC	3.28135	1.65191	UGT73B3	UDP-glycosyltransferase 73B3; Possesses quercetin 3-O-glucosyltransferase activity in vitro. Also active in vitro on benzoates and benzoate derivatives. Involved in stress or defense responses.
AT4G34210	UC	2.46011	UC	ASK11	SKP1-like protein 11; Involved in ubiquitination and subsequent proteasomal degradation of target proteins. Together with CUL1, RBX1 and a F-box protein, it forms a SCF E3 ubiquitin ligase compl [...]
AT4G35180	-2.86054	UC	-2.16066	LHT7	Lysine histidine transporter-like 7; Amino acid transporter; Belongs to the amino acid/polyamine transporter 2 family. Amino acid/auxin permease (AAAP) (TC 2.A.18.2) subfamily.
AT4G35190	UC	3.10118	UC	LOG5	Cytokinin riboside 5'-monophosphate phosphoribohydrolase LOG5; Cytokinin-activating enzyme working in the direct activation pathway. Phosphoribohydrolase that converts inactive cytokinin nucleot [...]
AT4G35500	0.968486	2.06467	UC	F8D20.10	Protein kinase superfamily protein.
AT4G35810	-2.89525	UC	-2.5212	P4H8	Probable prolyl 4-hydroxylase 8; Catalyzes the post-translational formation of 4- hydroxyproline in -Xaa-Pro-Gly- sequences in proline-rich peptide sequences of plant glycoproteins and other pro [...]
AT4G37070	UC	2.7256	UC	PLP1	Patatin-like protein 1; Possesses non-specific lipolytic acyl hydrolase (LAH) activity. Catalyzes the hydrolysis of the neutral lipids monogalactosyldiacylglycerol (MGDG), digalactosyldiacylglyc [...]
AT4G37608	UC	2.25839	UC	F19F18.90	Uncharacterized protein AT4g37600.
AT4G38010	UC	1.57115	UC	PCMP-E45	Pentatricopeptide repeat-containing protein At4g38010; Belongs to the PPR family. PCMP-E subfamily.
AT4G38905	UC	2.42016	UC	A0A1P8B399	Transmembrane protein.
AT4G39360	2.78445	4.55002	3.49776	T22F8.260	At4g39360.
AT4G39363	UC	1.66681	UC	- -	- -
AT5G01245	UC	2.70085	UC	- -	- -
AT5G01370	-2.72645	UC	-2.71114	ACI1	ALC-interacting protein 1.
AT5G01495	UC	2.14571	UC	- -	- -
AT5G01505	UC	1.68357	UC	- -	- -
AT5G01515	UC	2.57788	UC	- -	- -
AT5G01870	-2.87222	UC	-2.28881	LTP10	Non-specific lipid-transfer protein 10; Plant non-specific lipid-transfer proteins transfer phospholipids as well as galactolipids across membranes. May play a role in wax or cutin deposition in [...]
AT5G01990	UC	1.61209	UC	PILS6	Protein PIN-LIKES 6; Involved in cellular auxin homeostasis by regulating auxin metabolism. Regulates intracellular auxin accumulation at the endoplasmic reticulum and thus auxin availability fo [...]
AT5G03204	2.94144	4.47293	2.59016	B3H6S3_ARATH	Uncharacterized protein.
AT5G03495	UC	2.0929	UC	- -	- -
AT5G04275	UC	1.51629	UC	- -	- -
AT5G04380	UC	3.57685	UC	T19N18.110	S-adenosyl-L-methionine-dependent methyltransferases superfamily protein.
AT5G04425	-3.00759	UC	-1.82556	- -	- -
AT5G04760	UC	2.35853	UC	T1E3_120	Duplicated homeodomain-like superfamily protein.
AT5G04770	-3.15367	UC	-1.45941	CAT6	Cationic amino acid transporter 6, chloroplastic; Permease involved in the transport of the cationic neutral or acidic amino acids.
AT5G05990	UC	1.58184	UC	K18J17.19	Mitochondrial glycoprotein family protein.
AT5G06090	UC	2.28568	UC	GPAT7	Glycerol-3-phosphate acyltransferase 7; Esterifies acyl-group from acyl-ACP to the sn-1 position of glycerol-3-phosphate, an essential step in glycerolipid biosynthesis.
AT5G06115	UC	1.81488	UC	- -	- -
AT5G06190	1.63988	3.71189	1.98249	MBL20.7	Transmembrane protein.
AT5G06230	UC	2.31144	UC	TBL9	Protein trichome birefringence-like 9; May act as a bridging protein that binds pectin and other cell wall polysaccharides. Probably involved in maintaining esterification of pectins (By similar [...]
AT5G06310	UC	1.9182	UC	POT1B	Protection of telomeres protein 1b; Negatively regulates telomerase activity and participates in chromosome end protection. Binds RNA non-specifically. Associates with a regulatory Pol III-depen [...]
AT5G06730	UC	4.13732	UC	PER54	Peroxidase 54; Removal of H(2)O(2), oxidation of toxic reductants, biosynthesis and degradation of lignin, suberization, auxin catabolism, response to environmental stresses such as wounding, pa [...]
AT5G07105	UC	2.75967	UC	- -	- -
AT5G07780	UC	3.54957	UC	FH19	Formin-like protein 19; Belongs to the formin-like family. Class-II subfamily.
AT5G08715	UC	2.18955	UC	- -	- -
AT5G08805	UC	1.62073	UC	- -	- -
AT5G09480	UC	2.09703	UC	T5E8.280	Hydroxyproline-rich glycoprotein family protein.
AT5G11290	UC	2.15855	UC	F2I11.180	Transmembrane protein, putative (DUF247).
AT5G12280	UC	2.48694	UC	Q94CL4_ARATH	SWAP (Suppressor-of-White-APricot)/surp RNA-binding domain-containing protein.
AT5G13080	UC	6.31147	3.61969	WRKY75	Probable WRKY transcription factor 75; Transcription factor. Interacts specifically with the W box (5'-(T)TGAC[CT]-3'), a frequently occurring elicitor-responsive cis- acting element (By similar [...]
AT5G14310	-2.24403	2.83537	UC	CXE16	Probable carboxylesterase 16; Carboxylesterase acting on esters with varying acyl chain length.
AT5G15500	4.68715	6.79584	4.56875	T20K14.110	Ankyrin repeat family protein.
AT5G15510	-3.91958	UC	-2.62991	T20K14.120	TPX2 (Targeting protein for Xklp2) protein family.
AT5G17050	UC	1.73335	UC	UGT78D2	Flavonol 3-O-glucosyltransferase; Flavonol 3-O-glucosyltransferase that catalyzes the transfer of glucose from UDP-glucose to the 3-OH position of quercetin and kaempferol. Possesses high querce [...]
AT5G17360	UC	1.55506	UC	T10B6_20	DNA ligase.
AT5G20640	-2.92547	UC	-2.23386	T1M15.40	Protein LURP-one-related 16; Might be related to the phospholipid scramblase and tubby- like superfamily of membrane tethered transcription factors.
AT5G22140	-2.74326	UC	-2.26979	Q9C574_ARATH	FAD/NAD(P)-binding oxidoreductase family protein.
AT5G22545	5.71311	7.20614	5.27649	Q8GWC9_ARATH	Uncharacterized protein At5g22545.
AT5G23160	UC	2.77922	UC	MKD15.2	Uncharacterized protein At5g23160.
AT5G24655	UC	1.61886	UC	LSU4	Protein RESPONSE TO LOW SULFUR 4; Required for flower development in short-day conditions.
AT5G25020	UC	2.95811	UC	T11H3.30	Enhanced disease resistance-like protein (DUF1336).
AT5G26790	UC	2.69108	UC	F2P16.50	Transmembrane protein.
AT5G26865	UC	2.06254	UC	F2P16.19	AGAMOUS-like MADS-box protein.
AT5G28510	UC	2.30205	UC	BGLU24	Beta-glucosidase 24; Belongs to the glycosyl hydrolase 1 family.
AT5G28650	-3.8418	UC	-2.02539	WRKY74	Probable WRKY transcription factor 74; Transcription factor. Interacts specifically with the W box (5'-(T)TGAC[CT]-3'), a frequently occurring elicitor-responsive cis- acting element (By similar [...]
AT5G33370	-8.35222	-6.28878	-8.32659	F19N2.90	GDSL esterase/lipase At5g33370; Belongs to the 'GDSL' lipolytic enzyme family.
AT5G36180	UC	1.9137	UC	SCPL1	Serine carboxypeptidase-like 1; Probable carboxypeptidase.
AT5G37270	UC	1.51629	UC	MNJ8.6	RING/U-box superfamily protein.
AT5G37485	UC	2.86073	1.80726	- -	- -
AT5G37570	UC	1.57837	UC	PCMP-E37	Putative pentatricopeptide repeat-containing protein At5g37570; Belongs to the PPR family. PCMP-E subfamily.
AT5G38865	UC	1.88199	UC	A0A1P8BB09	Uncharacterized protein.
AT5G38900	UC	1.59427	UC	K15E6.80	Thioredoxin superfamily protein.
AT5G40210	UC	2.62273	UC	UMAMIT42	WAT1-related protein At5g40210.
AT5G42490	UC	2.77367	UC	KIN7J	Kinesin-like protein KIN-7J; Belongs to the TRAFAC class myosin-kinesin ATPase superfamily. Kinesin family. KIN-7 subfamily.
AT5G42700	-2.82411	UC	-2.82059	MJB21.7	B3 domain-containing protein At5g42700.
AT5G42780	-1.90544	UC	-1.28869	ZHD13	Zinc-finger homeodomain protein 13; Putative transcription factor.
AT5G43120	UC	1.92462	UC	MMG4.15	ARM-repeat/Tetratricopeptide repeat (TPR)-like protein.
AT5G44230	UC	1.6117	UC	PCMP-H17	Pentatricopeptide repeat-containing protein At5g44230; Belongs to the PPR family. PCMP-H subfamily.
AT5G44480	UC	2.04617	UC	DUR	Putative UDP-arabinose 4-epimerase 4.
AT5G44930	UC	1.85706	UC	ARAD2	Probable arabinosyltransferase ARAD2; Probable arabinosyl transferase responsible for the polymerization of arabinose into the arabinan of arabinogalactan. May function as inverting enzyme using [...]
AT5G45095	UC	3.22689	UC	Q8GZ89_ARATH	Uncharacterized protein.
AT5G45630	4.04857	5.65599	3.63586	MRA19.3	Uncharacterized protein.
AT5G45890	UC	3.20584	UC	SAG12	Senescence-specific cysteine protease SAG12; Cysteine protease that may have a developmental senescence specific cell death function during apoptosis, heavy metal detoxification, and hypersensit [...]
AT5G46080	0.628484	1.77305	UC	MCL19.13	Serine/threonine protein kinase-like protein.
AT5G46230	-1.73323	UC	-1.12895	MPL12.1	At5g46230.
AT5G46825	2.73165	4.62917	3.47822	A0A1P8BHC5	Uncharacterized protein.
AT5G46845	UC	2.57271	UC	- -	- -
AT5G47250	-2.11436	UC	-1.51285	MQL5.11	Probable disease resistance protein At5g47250; Probable disease resistance protein; Belongs to the disease resistance NB-LRR family.
AT5G47380	-2.57648	UC	-2.60937	MQL5.24	Uncharacterized protein.
AT5G47440	UC	1.87793	UC	MNJ7.2	Auxin canalization protein (DUF828).
AT5G48775	UC	1.75903	UC	- -	- -
AT5G49290	UC	1.59085	UC	RLP56	Receptor-like protein 56; Belongs to the RLP family.
AT5G50770	UC	3.19691	UC	HSD6	11-beta-hydroxysteroid dehydrogenase-like 6.
AT5G51990	UC	5.18193	3.7256	DREB1D	Dehydration-responsive element-binding protein 1D; Transcriptional activator that binds specifically to the DNA sequence 5'-[AG]CCGAC-3'. Binding to the C-repeat/DRE element mediates abscisic ac [...]
AT5G52170	UC	2.24611	UC	HDG7	Homeobox-leucine zipper protein HDG7; Probable transcription factor that binds to the DNA sequence 5'-GCATTAAATGC-3'.
AT5G52300	8.79159	10.8596	8.43941	LTI65	Low-temperature-induced 65 kDa protein; Belongs to the LTI78/LTI65 family.
AT5G53810	UC	1.59243	UC	MGN6.20	Caffeic acid 3-O-methyltransferase-like protein; Belongs to the class I-like SAM-binding methyltransferase superfamily. Cation-independent O-methyltransferase family.
AT5G54060	UC	2.56979	UC	A3G2XYLT	Anthocyanidin 3-O-glucoside 2'''-O-xylosyltransferase; Contributes to the last few anthocyanin biosynthetic steps. Converts cyanidin 3-O-glucoside to cyanidin 3-O-xylosyl(1->2)glucoside. Can use [...]
AT5G54690	UC	1.5395	UC	GAUT12	Probable galacturonosyltransferase 12; Involved in pectin assembly and/or distribution, and in the synthesis of secondary wall glucuronoxylan. Probably involved in the synthesis of the glycosyl [...]
AT5G55430	UC	2.55851	UC	MTE17.14	Uncharacterized protein.
AT5G55720	-3.79287	UC	-4.12043	MDF20.16	Putative pectate lyase 21.
AT5G57123	-2.74297	UC	-3.03396	Q8LCB5_ARATH	At5g57123.
AT5G58340	UC	1.77045	UC	MCK7.21	Myb-like HTH transcriptional regulator family protein.
AT5G60150	-3.1498	UC	-3.29003	F15L12.4	Uncharacterized protein.
AT5G60870	UC	1.71289	UC	RUG3	RCC1 domain-containing protein RUG3, mitochondrial; Regulates DNA damage response (DDR) synergistically with ATM. Together with ATM, involved in the splicing of the ND2/NAD2 mRNA. Required for t [...]
AT5G60966	UC	2.29278	UC	- -	- -
AT5G61000	-2.84312	UC	-2.38461	RPA1D	Replication protein A 70 kDa DNA-binding subunit D; Component of the replication protein A complex (RPA) required for DNA recombination, repair and replication. The activity of RPA is mediated b [...]
AT5G61740	-3.59482	UC	-1.88939	ABCA10	ABC transporter A family member 10.
AT5G61865	UC	2.02202	UC	Q501B3_ARATH	At5g61865.
AT5G62480	3.4663	5.27972	2.57495	GSTU9	Glutathione S-transferase U9; May be involved in the conjugation of reduced glutathione to a wide number of exogenous and endogenous hydrophobic electrophiles and have a detoxification role agai [...]
AT5G63300	UC	3.39845	UC	MDC12.27	Ribosomal protein S21 family protein.
AT5G64080	UC	1.56392	UC	XYP1	Non-specific lipid-transfer protein-like protein At5g64080; Belongs to the plant LTP family.
AT5G64510	UC	2.18785	UC	TIN1	Tunicamycin induced protein.
AT5G64667	-1.29306	UC	-1.73845	IDL2	Protein IDA-LIKE 2; May be involved in floral abscission.
AT5G64800	UC	2.11927	UC	CLE21	CLAVATA3/ESR (CLE)-related protein 21; Extracellular signal peptide that regulates cell fate. Represses root apical meristem maintenance. Belongs to the CLV3/ESR signal peptide family.
AT5G64905	UC	2.78165	UC	PEP3	Elicitor peptide 3; Elicitor of plant defense.
AT5G64960	UC	1.51629	UC	CDKC-2	Cyclin-dependent kinase C-2.
AT5G65500	UC	2.67972	UC	PUB50	Putative U-box domain-containing protein 50; Functions as an E3 ubiquitin ligase.
AT5G66607	UC	2.18047	UC	B3H4Z3_ARATH	Uncharacterized protein.
AT5G66780	8.11729	9.5269	7.72533	MUD21.2	Late embryogenesis abundant protein.
AT5G67090	UC	2.99538	UC	SBT1.9	Subtilisin-like protease SBT1.9.
AT5G67100	-3.46572	UC	-1.91493	POLA	DNA polymerase alpha catalytic subunit; Polymerase alpha in a complex with DNA primase is a replicative polymerase; Belongs to the DNA polymerase type-B family.
AT5G67110	UC	3.01397	UC	ALC	Transcription factor ALC; Required for the dehiscence of fruit, especially for the separation of the valve cells from the replum. Promotes the differentiation of a strip of labile nonlignified c [...]
AT5G67180	UC	2.01611	UC	TOE3	AP2-like ethylene-responsive transcription factor TOE3; Probably acts as a transcriptional activator. Binds to the GCC-box pathogenesis-related promoter element. May be involved in the regulatio [...]
ATMG00060	UC	2.10599	UC	- -	- -
ATMG00110	UC	2.33639	UC	CCMB	Putative cytochrome c biogenesis ccmB-like mitochondrial protein; May be involved in the export of heme to the mitochondrion for the biogenesis of c-type cytochromes.
ATMG00270	UC	2.00363	UC	ND6	NADH-ubiquinone oxidoreductase chain 6; Core subunit of the mitochondrial membrane respiratory chain NADH dehydrogenase (Complex I) that is believed to belong to the minimal assembly required fo [...]
ATMG00470	UC	3.02208	UC	M470_ARATH	Uncharacterized mitochondrial protein AtMg00470.
ATMG00910	UC	2.14422	UC	M910_ARATH	Uncharacterized mitochondrial protein AtMg00910.
ATMG01050	UC	2.04352	UC	M1050_ARATH	Uncharacterized mitochondrial protein AtMg01050.
ATMG01240	UC	2.54753	UC	M1240_ARATH	Uncharacterized mitochondrial protein AtMg01240.
ATMG01350	UC	2.11472	1.08004	M1350_ARATH	Uncharacterized mitochondrial protein AtMg01350.

## Sheet: Cluster 2
Gene_ ID	Log2FC WT	log2FC 10b	Log2FC OX-1	Gene Name	Annotation /Function
AT1G02050	1.50374	UC	1.51378	PKSA	Type III polyketide synthase A; Plant type III polyketide synthases (PKSs) that catalyzes the conden
AT1G02670	UC	-2.8607	UC	- -	- -
AT1G02900	UC	-3.53679	UC	RALF1	Protein RALF-like 1; Cell signaling peptide that may regulate plant stress, growth, and development. Mediates a rapid alkalinization of extracellular space by mediating a transient increase in t [...]
AT1G03010	UC	-2.1781	UC	F10O3.17	BTB/POZ domain-containing protein At1g03010; May act as a substrate-specific adapter of an E3 ubiquitin- protein ligase complex (CUL3-RBX1-BTB) which mediates the ubiquitination and subsequent p [...]
AT1G03020	UC	-2.42893	UC	GRXS1	Monothiol glutaredoxin-S1; May only reduce GSH-thiol disulfides, but not protein disulfides; Belongs to the glutaredoxin family. CC-type subfamily.
AT1G03170	UC	-2.60421	UC	FAF2	Protein FANTASTIC FOUR 2; Regulates the size of the shoot meristem by modulating the CLV3-WUS feedback loop. Can repress WUS but is under negative control by CLV3.
AT1G03760	2.08691	UC	1.46048	F21M11.33	Prefoldin chaperone subunit family protein.
AT1G03780	-2.95238	-4.53093	-2.87632	TPX2	Protein TPX2; Regulates prospindle assembly during late prophase and at the onset of mitosis, before nuclear envelope breakdown (NEB). Is exported from the nucleus shortly before NEB and organiz [...]
AT1G03870	-6.43389	-8.01548	-6.34676	FLA9	Fasciclin-like arabinogalactan protein 9; May be a cell surface adhesion protein; Belongs to the fasciclin-like AGP family.
AT1G05420	UC	-2.06009	UC	OFP12	Transcription repressor OFP12; Transcriptional repressor that regulates multiple aspects of plant growth and development through the regulation of BEL1-LIKE (BLH) and KNOX TALE (KNAT) homeodomai [...]
AT1G05450	4.04188	UC	2.51707	T25N20.10	Bifunctional inhibitor/lipid-transfer protein/seed storage 2S albumin superfamily protein.
AT1G05510	2.70991	UC	4.79238	OBAP1A	Oil body-associated protein 1A; Belongs to the OBAP family.
AT1G05820	UC	-2.32329	UC	SPPL5	Signal peptide peptidase-like 5; Intramembrane-cleaving aspartic protease (I-CLiP) that cleaves type II membrane signal peptides in the hydrophobic plane of the membrane.
AT1G06080	-5.84101	-7.31767	-5.36937	ADS1	Delta-9 acyl-lipid desaturase 1; Involved in delta-9 desaturation of fatty acids. Belongs to the fatty acid desaturase type 1 family.
AT1G06170	UC	-2.43443	UC	BHLH89	Transcription factor bHLH89.
AT1G06710	2.43046	UC	1.75517	F4H5.20	Pentatricopeptide repeat-containing protein At1g06710, mitochondrial.
AT1G06713	UC	-2.92113	UC	- -	- -
AT1G06717	UC	-1.88016	UC	- -	- -
AT1G07175	UC	-1.88016	UC	B3H674_ARATH	Alternative NAD(P)H dehydrogenase.
AT1G08283	UC	-2.0282	UC	- -	- -
AT1G08390	UC	-3.27297	UC	T27G7.27	RecQ-mediated instability-like protein.
AT1G11112	UC	-3.14978	UC	Q1G3V5_ARATH	Uncharacterized protein.
AT1G11500	UC	-3.1502	UC	T23J18.31	Transmembrane protein, putative (DUF1218).
AT1G11915	UC	-1.89652	UC	F12F1.23	Wall-associated receptor kinase galacturonan-binding protein.
AT1G12010	UC	-2.9877	UC	F12F1.12	1-aminocyclopropane-1-carboxylate oxidase 3; Enzyme involved in the ethylene biosynthesis. May promote stem elongation by maximizing the extensibility cells, possibly by activating ethylene bios [...]
AT1G13420	UC	-2.74746	UC	SOT8	Cytosolic sulfotransferase 8; Sulfotransferase that utilizes 3'-phospho-5'-adenylyl sulfate (PAPS) as sulfonate donor. No activity with brassinosteroids. Belongs to the sulfotransferase 1 family.
AT1G13610	UC	-1.88763	UC	F13B4.9	Alpha/beta-Hydrolases superfamily protein.
AT1G15085	UC	-2.25072	UC	A0A1P8AQK1	Uncharacterized protein.
AT1G15570	-2.25669	-4.57389	-3.0471	CYCA2-3	Cyclin-A2-3; Negatively regulates endocycles and acts as a regulator of ploidy levels in endoreduplication. Promotes divisions in the guard cells (GCs) after the guard mother cells (GMC) symmetr [...]
AT1G17065	UC	-2.53141	UC	A0A1P8AQ19	Uncharacterized protein.
AT1G17600	UC	-2.22225	UC	F1L3.30	Disease resistance protein (TIR-NBS-LRR class) family.
AT1G18835	UC	-3.64249	UC	MIF3	Mini zinc finger protein 3; Inhibits zinc finger homeodomain (ZHD) transcription factors by interacting with them to prevent both their nuclear localization and their DNA-binding properties. Inv [...]
AT1G19530	2.00196	UC	1.55394	F18O14.29	DNA polymerase epsilon catalytic subunit A.
AT1G19780	UC	-1.75653	UC	CNGC8	Putative cyclic nucleotide-gated ion channel 8; Putative cyclic nucleotide-gated ion channel; Belongs to the cyclic nucleotide-gated cation channel (TC 1.A.1.5) family.
AT1G19940	UC	-2.67847	UC	GH9B5	Endoglucanase 2; Belongs to the glycosyl hydrolase 9 (cellulase E) family.
AT1G21060	UC	-1.7314	UC	T22I11.12	Uncharacterized protein.
AT1G22110	UC	-2.28447	UC	F2E2.18	Structural constituent of ribosome.
AT1G22220	UC	-2.93513	UC	AUF2	F-box protein At1g22220.
AT1G22330	-8.34566	-9.81521	-7.76811	T16E15.6	RNA-binding (RRM/RBD/RNP motifs) family protein.
AT1G22480	6.59912	4.25247	5.41131	F12K8.17	Blue copper protein-like predicted GPI-anchored protein.
AT1G22500	UC	-2.3414	UC	ATL15	E3 ubiquitin-protein ligase ATL15; E3 ubiquitin-protein ligase able to catalyze polyubiquitination with ubiquitin-conjugating enzyme E2 UBC8, UBC10, UBC11, UBC28 and UBC29 in vitro.
AT1G22550	UC	-1.7704	UC	NPF5.16	Protein NRT1/ PTR FAMILY 5.16; Belongs to the PTR2/POT transporter (TC 2.A.17) family.
AT1G22900	UC	-3.87876	UC	DIR11	Dirigent protein 11; Dirigent proteins impart stereoselectivity on the phenoxy radical-coupling reaction, yielding optically active lignans from two molecules of coniferyl alcohol in the biosynt [...]
AT1G23070	2.63055	UC	1.91273	T26J12.15	Protein LAZ1 homolog 2; Belongs to the TMEM184 family.
AT1G23350	UC	-3.70474	UC	- -	- -
AT1G23760	UC	-2.86128	UC	PGL1	Polygalacturonase 1 beta-like protein 1; Involved in cell size determination.
AT1G24570	2.32812	UC	2.36552	AT1G24570.2	Transmembrane protein, putative (DUF707).
AT1G26590	UC	-2.00506	UC	T1K7.4	C2H2-like zinc finger protein.
AT1G27020	-5.13852	-7.7541	-4.89295	T7N9.8	Plant/protein.
AT1G28010	-3.67741	-5.55532	-2.85899	ABCB14	ABC transporter B family member 14.
AT1G29280	UC	-2.85889	UC	WRKY65	Probable WRKY transcription factor 65; Transcription factor. Interacts specifically with the W box (5'-(T)TGAC[CT]-3'), a frequently occurring elicitor-responsive cis- acting element (By similar [...]
AT1G30040	UC	-2.67222	UC	GA2OX2	Gibberellin 2-beta-dioxygenase 2; Catalyzes the 2-beta-hydroxylation of several biologically active gibberellins, leading to the homeostatic regulation of their endogenous level. Catabolism of g [...]
AT1G30600	UC	-1.70246	UC	SBT2.1	Subtilisin-like protease SBT2.1.
AT1G31310	UC	-3.69447	UC	T19E23.10	Hydroxyproline-rich glycoprotein family protein.
AT1G32460	UC	-1.79147	UC	F5D14.24	F5D14.24 protein.
AT1G32770	3.85995	UC	4.22046	NAC012	NAC domain-containing protein 12; Transcriptional activator of genes involved in biosynthesis of secondary walls. Together with NST1, required for the secondary cell wall thickening and lignific [...]
AT1G33340	UC	-2.55793	UC	F10C21.3	Putative clathrin assembly protein At1g33340.
AT1G33720	UC	-1.87302	UC	F14M2.15	Cytochrome P450, family 76, subfamily C, polypeptide 6; Belongs to the cytochrome P450 family.
AT1G33960	UC	-1.59621	UC	IAN8	Immune-associated nucleotide-binding protein 8.
AT1G34355	UC	-2.39364	UC	PS1	FHA domain-containing protein PS1; Required for normal spindle orientation at male meiosis II and normal formation of tetrad of microspores. Not involved in female meiosis.
AT1G35290	UC	-1.83943	UC	ALT1	Acyl-acyl carrier protein thioesterase ATL1, chloroplastic; Acyl-ACP thioesterase involved in the production of fatty acids and beta-keto fatty acids. Can produce fatty acids of medium to long c [...]
AT1G35910	UC	-2.67195	UC	TPPD	Probable trehalose-phosphate phosphatase D; Removes the phosphate from trehalose 6-phosphate to produce free trehalose. Trehalose accumulation in plant may improve abiotic stress tolerance (By s [...]
AT1G38065	UC	-1.66157	UC	OFUT10	O-fucosyltransferase 10; Belongs to the glycosyltransferase GT106 family.
AT1G38131	UC	-1.57512	UC	OFUT11	O-fucosyltransferase 11; Belongs to the glycosyltransferase GT106 family.
AT1G43800	-2.3076	-4.00533	-1.9862	S-ACP-DES6	Stearoyl-[acyl-carrier-protein] 9-desaturase 6, chloroplastic; Converts stearoyl-ACP to oleoyl-ACP by introduction of a cis double bond between carbons 9 and 10 of the acyl chain. Belongs to the [...]
AT1G46480	UC	-3.6984	-2.33575	WOX4	WUSCHEL-related homeobox 4; Transcription factor which may be involved in developmental processes.
AT1G47655	UC	-1.68846	UC	DOF1.6	Dof zinc finger protein DOF1.6; Transcription factor that binds specifically to a 5'-AA[AG]G- 3' consensus core sequence.
AT1G48315	UC	-2.53949	UC	- -	- -
AT1G49000	UC	-1.76385	UC	F27J15.21	Transmembrane protein.
AT1G49320	UC	-1.59413	UC	USPL1	BURP domain protein USPL1; Associated with the protein storage vacuole formation.
AT1G49490	UC	-1.8213	UC	PEX2-2	Pollen-specific leucine-rich repeat extensin-like protein 2; Modulates cell morphogenesis by regulating cell wall formation and assembly, and/or growth polarization.
AT1G50900	UC	-2.45179	UC	LTD	Protein LHCP TRANSLOCATION DEFECT; Involved in the import of light-harvesting complex proteins (LHCP) and subsequent routing of these proteins to the chloroplast signal recognition particle (SRP [...]
AT1G52245	UC	-3.24951	UC	- -	- -
AT1G52700	-2.56165	-4.74924	-3.0275	F6D8.5	Alpha/beta-Hydrolases superfamily protein.
AT1G52920	3.11966	UC	3.67383	GCR2	LanC-like protein GCR2; May play a role in abscisic acid (ABA) signaling. Belongs to the LanC-like protein family.
AT1G53350	UC	-1.5408	UC	RPP8L2	Probable disease resistance RPP8-like protein 2; Potential disease resistance protein; Belongs to the disease resistance NB-LRR family. RPP8/HRT subfamily.
AT1G54010	-2.86946	-5.58795	-2.88927	GLL23	Inactive GDSL esterase/lipase-like protein 23; Involved in the control of the PYK10 complex size and possibly substrate specificity. May be exported from the endoplamic reticulum upon interactio [...]
AT1G55390	UC	-1.88813	UC	T18I3.3	Cysteine/Histidine-rich C1 domain family protein.
AT1G58190	UC	-2.38523	UC	RLP9B	Receptor-like protein 9b.
AT1G60590	-3.76621	-4.86884	-2.96925	F8A5.12	Pectin lyase-like superfamily protein.
AT1G61700	2.4723	UC	2.61619	NRPB10L	DNA-directed RNA polymerase subunit 10-like protein; Belongs to the archaeal RpoN/eukaryotic RPB10 RNA polymerase subunit family.
AT1G61795	UC	-2.28676	UC	RIC9	CRIB domain-containing protein RIC9; Functions as downstream effector of Rho-related GTP binding proteins of the 'Rho of Plants' (ROPs) family. Participates in the propagation of ROP GTPase sign [...]
AT1G62420	UC	-2.22314	UC	F24O1.44	DUF506 family protein (DUF506).
AT1G62610	2.40208	UC	1.24621	T3P18.17	NAD(P)-binding Rossmann-fold superfamily protein; Belongs to the short-chain dehydrogenases/reductases (SDR) family.
AT1G63055	3.81991	UC	2.69712	Q5XVH6_ARATH	Transmembrane protein.
AT1G63470	UC	-1.70595	UC	AHL5	AT-hook motif nuclear-localized protein 5; Transcription factor that specifically binds AT-rich DNA sequences related to the nuclear matrix attachment regions (MARs).
AT1G64625	UC	-2.98568	UC	BHLH157	Transcription factor bHLH157; Transcription factor that may regulate root development.
AT1G65240	UC	-3.20015	-2.08435	T23K8.15	Aspartic proteinase-like protein 2.
AT1G65590	-2.1777	-3.75058	-1.99112	HEXO3	Beta-hexosaminidase 3; Has a broad substrate specificity. Can use synthetic substrates such as pyridylaminated chitotriose, p-nitrophenyl-beta-N- acetylglucosaminide, p-nitrophenyl-2-acetamido-2 [...]
AT1G65620	UC	-1.64227	UC	AS2	Protein ASYMMETRIC LEAVES 2; Negative regulator of cell proliferation in the adaxial side of leaves. Regulates the formation of a symmetric lamina and the establishment of venation. Positively r [...]
AT1G66060	UC	-2.5458	UC	F15E12.9	Uncharacterized protein F15E12.9.
AT1G66230	UC	-1.8892	UC	MYB20	Transcription factor MYB20; Transcription factor that acts as positive regulator of abscisic acid (ABA) signaling in response to salt stress. Acts as negative regulator ABI1, ABI2 and PP2CA, whi [...]
AT1G66320	UC	-2.06405	UC	T27F4.7	FBD-associated F-box protein At1g66320.
AT1G66465	UC	-3.75805	UC	A0A1P8ASK0	Transmembrane protein.
AT1G66830	2.13699	UC	2.08558	F4N21.23	Probable inactive leucine-rich repeat receptor-like protein kinase At1g66830; Belongs to the protein kinase superfamily. Ser/Thr protein kinase family.
AT1G67780	UC	-1.89652	UC	F12A21.9	Zinc-finger domain of monoamine-oxidase A repressor R1 protein.
AT1G68110	UC	-3.18782	-2.10531	T23K23.4	Putative clathrin assembly protein At1g68110.
AT1G68240	UC	-3.06884	UC	BHLH109	Transcription factor bHLH109; Transcription factor involved in somatic embryogenesis. Acts as positive regulator of somatic embryo formation. Acts as positive regulator of ECP63 by targeting its [...]
AT1G68725	UC	-2.26656	UC	AGP19	Lysine-rich arabinogalactan protein 19; Proteoglycan that seems to be implicated in diverse developmental roles such as differentiation, cell-cell recognition, embryogenesis and programmed cell [...]
AT1G68800	UC	-4.01091	UC	TCP12	Transcription factor TCP12; Transcription factor that prevents axillary bud outgrowth. May also delay early axillary bud development. Probably involved in the auxin-induced control of apical dom [...]
AT1G70690	UC	-2.99212	UC	PDLP5	Plasmodesmata-located protein 5; Modulates cell-to-cell trafficking. Has a positive role in innate immunity. Required for systemic acquired resistance (SAR) which is mediated by the signaling mo [...]
AT1G71015	UC	-2.56893	UC	F15H11.21	Plastid movement impaired protein.
AT1G71030	-0.964384	-2.00331	UC	MYBL2	Putative transcription factor; 20982-20139.
AT1G71830	UC	-2.53798	UC	SERK1	Somatic embryogenesis receptor kinase 1; Dual specificity kinase acting on both serine/threonine- and tyrosine-containing substrates. Phosphorylates BRI1 on 'Ser-887' and CDC48 on at least one t [...]
AT1G71866	UC	-2.44077	UC	EPFL7	EPIDERMAL PATTERNING FACTOR-like protein 7; Controls stomatal patterning; Belongs to the plant cysteine rich small secretory peptide family. Epidermal patterning factor subfamily.
AT1G72670	UC	-3.91922	UC	Iqd8	IQ-domain 8.
AT1G73210	1.56255	UC	1.69989	T18K17.12	At1g73210.
AT1G73220	4.84622	3.25065	5.44879	OCT1-2	Organic cation/carnitine transporter 1; High affinity carnitine transporter involved in the active cellular uptake of carnitine. Also transports organic cations. Regulates lateral root developme [...]
AT1G73325	UC	-1.72132	UC	KTI3	Kunitz trypsin inhibitor 3; Exhibits Kunitz trypsin protease inhibitor activity. Belongs to the protease inhibitor I3 (leguminous Kunitz- type inhibitor) family.
AT1G73550	UC	-2.70346	UC	T9L24.29	Bifunctional inhibitor/lipid-transfer protein/seed storage 2S albumin superfamily protein.
AT1G74675	UC	-4.06863	-2.03605	A0A1P8AVR2	Transmembrane protein.
AT1G75050	UC	-2.70867	UC	F9E10.10	Pathogenesis-related thaumatin superfamily protein.
AT1G75280	UC	-1.52886	UC	F22H5.17	Isoflavone reductase homolog P3; Belongs to the NmrA-type oxidoreductase family. Isoflavone reductase subfamily.
AT1G75720	UC	-2.56129	UC	F10A5.8	WEB family protein At1g75720.
AT1G76240	-5.2741	-6.28736	-4.3542	T23E18.17	DUF241 domain protein (DUF241).
AT1G76410	UC	-1.95301	-0.941199	ATL8	RING-H2 finger protein ATL8; Belongs to the RING-type zinc finger family. ATL subfamily.
AT1G76870	UC	-1.76004	UC	F7O12.4	Transcription factor.
AT1G77690	-2.6923	-4.68362	-2.67483	LAX3	Auxin transporter-like protein 3; Carrier protein involved in proton-driven auxin influx. Mediates the formation of auxin gradient from developing leaves (site of auxin biosynthesis) to tips by [...]
AT1G77855	UC	-2.65914	UC	F4I8K1_ARATH	BPS1-like protein.
AT1G77870	UC	-2.80308	UC	MUB5	Membrane-anchored ubiquitin-fold protein 5; May serve as docking site to facilitate the association of other proteins to the plasma membrane.
AT1G78090	UC	-3.89071	UC	TPPB	Trehalose-phosphate phosphatase B; Removes the phosphate from trehalose 6-phosphate to produce free trehalose. Trehalose accumulation in plant may improve abiotic stress tolerance.
AT1G78320	UC	-1.54093	UC	GSTU23	Glutathione S-transferase U23; May be involved in the conjugation of reduced glutathione to a wide number of exogenous and endogenous hydrophobic electrophiles and have a detoxification role aga [...]
AT1G78370	UC	-2.35955	UC	GSTU20	Glutathione S-transferase U20; Exhibits glutathione-dependent thiol transferase activities. Can use glutathione (GSH) and 1-chloro-2,4-dinitrobenzene (CDNB) as substrates. Involved in the regula [...]
AT1G78770	UC	-2.37665	UC	APC6	Anaphase-promoting complex subunit 6; Component of the anaphase promoting complex/cyclosome (APC/C), a cell cycle-regulated E3 ubiquitin-protein ligase complex that controls progression through [...]
AT1G80340	UC	-1.88763	UC	GA3OX2	Gibberellin 3-beta-dioxygenase 2; Converts the inactive gibberellin (GA) precursors GA9 and GA20 in the bioactives gibberellins GA4 and GA1. Involved in the production of bioactive GA for vegeta [...]
AT1G80690	-1.71592	-2.67926	-0.93344	F23A5.4	PPPDE putative thiol peptidase family protein.
AT2G01890	3.42028	UC	5.10286	PAP8	Purple acid phosphatase 8.
AT2G01905	UC	-2.59182	UC	CYCJ18	Cyclin-J18.
AT2G02020	UC	-2.4522	UC	NPF8.4	Protein NRT1/ PTR FAMILY 8.4.
AT2G03850	3.03595	UC	3.86464	T18C20.5	Late embryogenesis abundant protein (LEA) family protein.
AT2G04750	UC	-1.64285	UC	FIM4	Fimbrin-4; Cross-links actin filaments (F-actin). Stabilizes and prevents F-actin depolymerization mediated by profilin. May regulate actin cytoarchitecture, cell cycle, cell division, cell elon [...]
AT2G04790	-1.969	-3.50015	-1.8077	F28I8.17	PTB domain engulfment adapter.
AT2G05160	UC	-2.19386	UC	F5G3.6	Zinc finger CCCH domain-containing protein 18; Possesses ribonuclease activity in vitro.
AT2G05695	3.31597	UC	2.45036	- -	- -
AT2G07652	1.86847	UC	1.11775	A0A1P8B2U8	Uncharacterized protein.
AT2G09205	UC	-2.44308	UC	- -	- -
AT2G10940	-8.35821	-10.1913	-8.47821	F15K19.1	Bifunctional inhibitor/lipid-transfer protein/seed storage 2S albumin superfamily protein.
AT2G13570	UC	-2.1627	UC	NFYB7	Nuclear transcription factor Y subunit B-7; Component of the NF-Y/HAP transcription factor complex. The NF-Y complex stimulates the transcription of various genes by recognizing and binding to a [...]
AT2G15390	UC	-1.92791	UC	FUT4	Probable fucosyltransferase 4; May be involved in cell wall biosynthesis. May act as a fucosyltransferase; Belongs to the glycosyltransferase 37 family.
AT2G17740	UC	-3.93464	UC	T17A5.16	Cysteine/Histidine-rich C1 domain family protein.
AT2G18060	UC	-2.9312	UC	NAC037	NAC domain-containing protein 37; Transcription activator that binds to the secondary wall NAC binding element (SNBE), 5'- (T/A)NN(C/T)(T/C/G)TNNNNNNNA(A/C)GN(A/C/T)(A/T)-3', in the promoter of [...]
AT2G18180	UC	-3.17496	UC	SFH10	Phosphatidylinositol/phosphatidylcholine transfer protein SFH10; Required for transport of secretory proteins from the Golgi complex. Catalyzes the transfer of phosphatidylinositol and phosphati [...]
AT2G18780	1.85599	UC	1.55241	MSF3.16	F-box protein At2g18780.
AT2G19090	UC	-3.29853	UC	T20K24.10	DUF630 family protein (DUF630 and DUF632).
AT2G19110	UC	-1.81862	UC	HMA4	Putative cadmium/zinc-transporting ATPase HMA4; Involved in cadmium/zinc transport; Belongs to the cation transport ATPase (P-type) (TC 3.A.3) family. Type IB subfamily.
AT2G20635	UC	-2.23233	UC	BUB1	Mitotic checkpoint serine/threonine-protein kinase BUB1; Serine/threonine-protein kinase that performs 2 crucial functions during mitosis: it is essential for spindle-assembly checkpoint signali [...]
AT2G20700	UC	-2.92287	UC	LLG2	GPI-anchored protein LLG2.
AT2G20880	UC	-3.67913	UC	ERF053	Ethylene-responsive transcription factor ERF053; Transcriptional activator involved in abiotic stress tolerance. Can directly regulate stress-related gene expression by binding to the DNA sequen [...]
AT2G20980	UC	-2.29164	UC	MCM10	Minichromosome maintenance 10.
AT2G21050	UC	-2.01154	UC	LAX2	Auxin transporter-like protein 2; Carrier protein involved in proton-driven auxin influx. Mediates the formation of auxin gradient from developing leaves (site of auxin biosynthesis) to tips by [...]
AT2G21260	1.10162	UC	1.7705	F3K23.2	Putative NADPH dependent mannose 6-phosphate reductase.
AT2G21910	UC	-2.9536	UC	CYP96A5	Cytochrome P450, family 96, subfamily A, polypeptide 5; Belongs to the cytochrome P450 family.
AT2G22510	2.30524	UC	2.70286	F14M13.9	Hydroxyproline-rich glycoprotein family protein.
AT2G22810	-1.18493	-2.97982	UC	ACS4	1-aminocyclopropane-1-carboxylate synthase 4; 1-aminocyclopropane-1-carboxylate synthase (ACS) enzymes catalyze the conversion of S-adenosyl-L-methionine (SAM) into 1- aminocyclopropane-1-carbox [...]
AT2G23030	3.55414	UC	3.22188	SRK2J	Serine/threonine-protein kinase SRK2J; Belongs to the protein kinase superfamily. Ser/Thr protein kinase family.
AT2G23240	3.67292	UC	4.27728	MT4B	Metallothionein-like protein 4B; Metallothioneins have a high content of cysteine residues that bind various heavy metals (Probable). Functions as metal chelator of copper (Cu) and zinc (Zn). Pl [...]
AT2G23300	UC	-2.98038	UC	LRR-RLK-4	Leucine-rich repeat protein kinase family protein.
AT2G23530	UC	-2.30943	UC	F26B6.18	Zinc-finger domain of monoamine-oxidase A repressor R1.
AT2G25130	UC	-2.59182	UC	F13D4.90	ARM repeat superfamily protein.
AT2G25150	UC	-2.12475	UC	SCT	Spermidine coumaroyl-CoA acyltransferase; Spermidine coumaroyl-CoA acyltransferase that mediates the conversion of spermidine into dicoumaroyl-spermidine.
AT2G26040	UC	-3.22962	UC	PYL2	Abscisic acid receptor PYL2; Receptor for abscisic acid (ABA) required for ABA-mediated responses such as stomatal closure and germination inhibition. Inhibits the activity of group-A protein ph [...]
AT2G26120	UC	-2.18927	UC	T19L18.7	Glycine-rich protein.
AT2G27080	UC	-2.84906	UC	NHL13	NDR1/HIN1-like protein 13; Required for plant immunity against the bacterial pathogen Pseudomonas syringae pv. tomato DC3000 (Pst DC3000).
AT2G27180	2.17301	UC	2.06441	T22O13.5	Expressed protein.
AT2G27313	UC	-2.92803	UC	A0A1P8B203	Uncharacterized protein.
AT2G27430	UC	-2.50797	UC	F10A12.11	ARM repeat superfamily protein.
AT2G27990	1.77225	UC	1.75132	BLH8	BEL1-like homeodomain protein 8; Required for specifying floral primordia and establishing early internode patterning events during inflorescence development. Belongs to the TALE/BELL homeobox f [...]
AT2G28085	UC	-3.61701	UC	SAUR42	SAUR-like auxin-responsive protein family.
AT2G28460	UC	-1.81384	UC	T1B3.1	Cysteine/Histidine-rich C1 domain family protein.
AT2G28630	UC	-6.21426	-4.36362	KCS12	3-ketoacyl-CoA synthase 12.
AT2G28690	UC	-2.14179	UC	T8O18.2	TOX high mobility group box protein, putative (DUF1635).
AT2G29050	UC	-1.67322	UC	RBL1	RHOMBOID-like protein 1; Probable rhomboid-type serine protease that catalyzes intramembrane proteolysis. Unable to cleave the Drosophila protein Spitz.
AT2G30130	UC	-2.06405	UC	LBD12	LOB domain-containing protein 12.
AT2G30395	UC	-2.57452	UC	OFP17	Transcription repressor OFP17; Transcriptional repressor that may regulate multiple aspects of plant growth and development through the regulation of BEL1-LIKE (BLH) and KNOX TALE (KNAT) homeodo [...]
AT2G30830	UC	-2.37223	UC	F7F1.4	2-oxoglutarate (2OG) and Fe(II)-dependent oxygenase superfamily protein; Belongs to the iron/ascorbate-dependent oxidoreductase family.
AT2G30890	UC	-3.72743	-2.58181	F7F1.10	Cytochrome b561 domain-containing protein At2g30890.
AT2G31985	3.05233	UC	2.6106	OBAP1B	Oil body-associated protein 1B.
AT2G32310	UC	-1.88763	UC	T32F6.17	CCT motif family protein.
AT2G32590	UC	-1.56673	UC	CAPH	Condensin complex subunit 2; Regulatory subunit of the condensin complex, a complex required for conversion of interphase chromatin into mitotic-like condense chromosomes. The condensin complex [...]
AT2G32680	UC	-1.88361	UC	RLP23	Receptor like protein 23; Involved in the perception of necrosis and ethylene-inducing peptide 1-like proteins (NLPs), that act as extracellular signals mediating immune activation. Component of [...]
AT2G32750	UC	-2.67116	UC	GT12	Probable xyloglucan galactosyltransferase GT12; Functions in xyloglucan synthesis by adding side chains to the xylosylated glucan backbone. Involved in the galactosylation of hemicellulose xylog [...]
AT2G32990	UC	-2.25515	UC	GH9B8	Endoglucanase 11; Belongs to the glycosyl hydrolase 9 (cellulase E) family.
AT2G33175	UC	-2.70867	UC	F4IVQ7_ARATH	Transmembrane protein.
AT2G33205	UC	-2.03609	UC	A0A1P8B1A7	Serinc-domain containing serine and sphingolipid biosynthesis protein.
AT2G33750	UC	-3.03954	UC	PUP2	Purine permease 2; Mediates adenine transport. May be involved in the uptake of cytokinin analogs; Belongs to the purine permeases (TC 2.A.7.14) family.
AT2G34170	-1.38491	-3.94125	-2.4761	T14G11.29	Uncharacterized protein At2g34170.
AT2G34490	UC	-1.92921	UC	CYP710A2	Cytochrome P450 710A2; Required to form the C-22 double bond in the sterol side chain. Possesses in vitro C-22 desaturase activity toward 24-epi- campesterol and beta-sitosterol and produces bra [...]
AT2G34960	UC	-1.94802	UC	CAT5	Cationic amino acid transporter 5; High-affinity permease involved in the transport of the cationic amino acids (e.g. arginine, and, to a lower extent, citrulline and glutamate). Transport mostl [...]
AT2G35710	UC	-3.34375	UC	PGSIP8	Putative glucuronosyltransferase PGSIP8.
AT2G35910	UC	-2.10188	UC	ATL70	RING-H2 finger protein ATL70; Belongs to the RING-type zinc finger family. ATL subfamily.
AT2G35950	3.14132	UC	2.27392	EDA12	Embryo sac development arrest 12.
AT2G36010	UC	-2.13436	UC	E2FA	Transcription factor E2FA; Transcription activator that binds DNA cooperatively with DP proteins through the E2 recognition site, 5'-TTTC[CG]CGC-3' found in the promoter region of a number of ge [...]
AT2G36120	-2.1914	-3.49411	-1.53376	DOT1	Glycine-rich protein DOT1; Involved in leaf vasculature patterning.
AT2G36690	UC	-2.04897	UC	F13K3.9	2-oxoglutarate (2OG) and Fe(II)-dependent oxygenase superfamily protein; Belongs to the iron/ascorbate-dependent oxidoreductase family.
AT2G37180	-2.26374	-4.01733	-2.5489	PIP2-3	Aquaporin PIP2-3; Water channel required to facilitate the transport of water across cell membrane; mercury-insensitive. Belongs to the MIP/aquaporin (TC 1.A.8) family. PIP (TC 1.A.8.11) subfami [...]
AT2G37280	UC	-2.26587	UC	ABCG33	ABC transporter G family member 33; May be a general defense protein; Belongs to the ABC transporter superfamily. ABCG family. PDR (TC 3.A.1.205) subfamily.
AT2G37380	-1.72316	-4.33017	UC	MAKR3	Probable membrane-associated kinase regulator 3.
AT2G37460	-3.11767	-4.42735	-2.47321	UMAMIT12	WAT1-related protein At2g37460.
AT2G38500	UC	-3.6178	UC	T6A23.30	2-oxoglutarate (2OG) and Fe(II)-dependent oxygenase superfamily protein.
AT2G39560	UC	-2.57379	UC	F12L6.22	Putative membrane lipoprotein.
AT2G41510	UC	-3.85038	UC	CKX1	Cytokinin dehydrogenase 1; Catalyzes the oxidation of cytokinins, a family of N(6)- substituted ade
AT2G42388	UC	-2.14485	UC	- -	- -
AT2G42885	UC	-3.26842	UC	F7D19	Defensin-like protein 54.
AT2G43100	UC	-2.00492	UC	SSU2	3-isopropylmalate dehydratase small subunit 2; Catalyzes the isomerization between 2-isopropylmalate and 3- isopropylmalate, via the formation of 2-isopropylmaleate (Probable). Functions redunda [...]
AT2G44240	UC	-4.61963	UC	F4I1.5	NEP-interacting protein (DUF239).
AT2G44380	UC	-2.44925	UC	F4I1.19	Cysteine/Histidine-rich C1 domain family protein.
AT2G44578	UC	-2.63161	UC	A8MS73_ARATH	RING/U-box superfamily protein.
AT2G45180	-3.59014	-5.10043	-3.31318	F4L23.31	Bifunctional inhibitor/lipid-transfer protein/seed storage 2S albumin superfamily protein.
AT2G46040	UC	-1.88249	UC	ARID1	AT-rich interactive domain-containing protein 1.
AT2G46130	2.34842	UC	1.91792	WRKY43	Probable WRKY transcription factor 43; Transcription factor. Interacts specifically with the W box (5'-(T)TGAC[CT]-3'), a frequently occurring elicitor-responsive cis- acting element (By similar [...]
AT2G46770	UC	-2.43443	UC	NAC043	NAC domain-containing protein 43; Transcription activator of genes involved in biosynthesis of secondary walls. Together with NST2 and NST3, required for the secondary cell wall thickening of sc [...]
AT2G46830	2.42054	UC	3.00208	CCA1	Protein CCA1; Transcription factor involved in the circadian clock and in the phytochrome regulation. Binds to the promoter regions of APRR1/TOC1 and TCP21/CHE to repress their transcription. Bi [...]
AT2G47520	UC	-2.44915	UC	ERF071	Ethylene-responsive transcription factor ERF071; Probably acts as a transcriptional activator. Binds to the GCC-box pathogenesis-related promoter element. May be involved in the regulation of ge [...]
AT3G01330	UC	-2.00083	UC	E2FF	E2F transcription factor-like E2FF; Inhibitor of E2F-dependent activation of gene expression. Binds specifically the E2 recognition site without interacting with DP proteins and prevents transcr [...]
AT3G01700	UC	-2.30133	UC	AGP11	Classical arabinogalactan protein 11; Proteoglycan that seems to be implicated in diverse developmental roles such as differentiation, cell-cell recognition, embryogenesis and programmed cell de [...]
AT3G03265	UC	-2.87414	UC	- -	- -
AT3G03325	UC	-2.41053	UC	- -	- -
AT3G03530	2.47914	UC	3.08679	NPC4	Non-specific phospholipase C4; Non-specific phospholipase C (PLC) which assumes major PLC activity during inorganic phosphate starvation. Substrate preference is phosphatidylcholine (PC), but ca [...]
AT3G04850	UC	-2.31763	UC	TCX4	Protein tesmin/TSO1-like CXC 4; Plays a role in development of both male and female reproductive tissues.
AT3G05140	UC	-2.27172	UC	RBK2	Receptor-like cytosolic serine/threonine-protein kinase RBK2; Belongs to the protein kinase superfamily. Ser/Thr protein kinase family.
AT3G06140	-3.00429	-5.15898	-3.32065	LUL4	Probable E3 ubiquitin-protein ligase LUL4; Acts as an E3 ubiquitin-protein ligase, or as part of E3 complex, which accepts ubiquitin from specific E2 ubiquitin-conjugating enzymes and then trans [...]
AT3G06990	UC	-2.99006	UC	F17A9.14	Cysteine/Histidine-rich C1 domain family protein.
AT3G07000	-2.00318	-4.34126	-3.07929	F17A9.15	Cysteine/Histidine-rich C1 domain family protein.
AT3G07580	UC	-2.13358	UC	Q6NME2_ARATH	mRNA, clone: RAFL23-27-I04.
AT3G07635	-1.10655	-2.37306	UC	- -	- -
AT3G08660	UC	-2.03346	UC	F17O14.13	Putative BTB/POZ domain-containing protein At3g08660; May act as a substrate-specific adapter of an E3 ubiquitin- protein ligase complex (CUL3-RBX1-BTB) which mediates the ubiquitination and sub [...]
AT3G09032	UC	-2.04186	UC	Q6ID69_ARATH	Josephin-like protein.
AT3G09095	UC	-3.34831	UC	- -	- -
AT3G09260	UC	-3.33537	-1.75298	BGLU23	Beta-glucosidase 23; Beta-D-glucosidase active on scopolin > esculin >> 4-MU- glucoside >> DIMBOA-glucoside. No activity with pNP-glucoside, oNP- glucoside and sinigrin as substrates. May posses [...]
AT3G09345	UC	-2.31003	UC	- -	- -
AT3G09450	4.32758	UC	3.42072	F11F8_2	Fusaric acid resistance family protein.
AT3G09605	UC	-1.88763	UC	- -	- -
AT3G10280	UC	-3.74673	UC	KCS14	Probable 3-ketoacyl-CoA synthase 14.
AT3G10880	UC	-3.57039	-1.88347	Q58FW3_ARATH	Tropomyosin.
AT3G13404	UC	-4.02551	UC	F4JCA6_ARATH	Uncharacterized protein.
AT3G13600	UC	-3.36066	UC	IQM2	IQ domain-containing protein IQM2; May be involved in biotic and abiotic stress responses.
AT3G13750	-5.33077	-6.60699	-4.74737	BGAL1	Beta-galactosidase 1.
AT3G15340	1.87951	UC	2.43535	PPI2	Proton pump-interactor 2; May regulate plasma membrane ATPase activity; Belongs to the plant Proton pump-interactor protein family.
AT3G15440	UC	-2.9093	UC	MJK13.10	RING/U-box protein.
AT3G15800	UC	-2.06497	UC	F4J030_ARATH	Glycosyl hydrolase superfamily protein; Belongs to the glycosyl hydrolase 17 family.
AT3G16280	UC	-2.20747	UC	ERF036	Ethylene-responsive transcription factor ERF036; Probably acts as a transcriptional activator. Binds to the GCC-box pathogenesis-related promoter element. May be involved in the regulation of ge [...]
AT3G16380	UC	-1.88016	UC	PAB6	Polyadenylate-binding protein 6; Binds the poly(A) tail of mRNA. Appears to be an important mediator of the multiple roles of the poly(A) tail in mRNA biogenesis, stability and translation (By s [...]
AT3G17580	UC	-4.29538	-3.02221	Q9LUN9_ARATH	SsrA-binding protein.
AT3G17680	-2.68247	-3.71438	-1.95403	F4J6D3_ARATH	Kinase interacting (KIP1-like) family protein.
AT3G18010	UC	-2.87832	UC	WOX1	WUSCHEL-related homeobox 1; Transcription factor which may be involved in developmental processes.
AT3G18070	UC	-2.3858	UC	BGLU43	Beta-glucosidase 43; Belongs to the glycosyl hydrolase 1 family.
AT3G18535	UC	-1.50954	UC	F4J8S5_ARATH	Tubulin-tyrosine ligase.
AT3G18900	UC	-2.34424	UC	A0A1I9LMH3	Ternary complex factor MIP1 leucine-zipper protein.
AT3G19200	UC	-2.72753	UC	Q9LJK8_ARATH	Uncharacterized protein.
AT3G20200	UC	-2.68916	UC	Q8GWU3_ARATH	Kinase with adenine nucleotide alpha hydrolases-like domain-containing protein.
AT3G21710	3.27978	UC	2.91105	VUP1	Vascular-related unknown protein 1; Involved in the regulation of xylem development and growth. May regulate secondary wall formation during vascular development by modulation of brassinosteroid [...]
AT3G22790	UC	-2.56686	UC	NET1A	Protein NETWORKED 1A; Plant-specific actin binding protein. Associates with F-actin at the plasma membrane and plasmodesmata. May be part of a membrane- cytoskeletal adapter complex; Belongs to [...]
AT3G23370	UC	-2.98702	UC	Q9LW59_ARATH	RNA-binding (RRM/RBD/RNP motifs) family protein.
AT3G23740	UC	-2.22412	UC	Q9LK44_ARATH	Uncharacterized protein.
AT3G23800	UC	-1.89652	UC	SBP3	Selenium-binding protein 3; Belongs to the selenium-binding protein family.
AT3G23880	-1.91193	-3.66519	-1.20677	F14O13.7	F-box/kelch-repeat protein At3g23880.
AT3G24065	UC	-2.49046	UC	Q9LIQ1_ARATH	Plant self-incompatibility protein S1 family.
AT3G26470	-1.24795	-2.696	UC	Q9LIM8_ARATH	Powdery mildew resistance protein, RPW8 domain-containing protein.
AT3G26520	-3.88653	-5.34274	-3.70855	TIP1-2	Aquaporin TIP1-2; Water channel required to facilitate the transport of water across cell membrane. May be involved in the osmoregulation in plants under high osmotic stress such as under a high [...]
AT3G26700	UC	-1.70712	UC	F4JDN8_ARATH	Protein kinase superfamily protein; Belongs to the protein kinase superfamily.
AT3G26760	UC	-1.76904	UC	Q9LW35_ARATH	NAD(P)-binding Rossmann-fold superfamily protein.
AT3G26960	UC	-2.43696	UC	F4JEV5_ARATH	Pollen Ole e 1 allergen and extensin family protein.
AT3G27440	2.97335	UC	3.08594	UKL5	Probable uracil phosphoribosyltransferase; Involved in the pyrimidine salvage pathway; In the C-terminal section; belongs to the UPRTase family.
AT3G27730	UC	-2.2809	UC	MER3	DExH-box ATP-dependent RNA helicase DExH17; DNA helicase required for crossover formation, complete synapsis of homologous chromosomes and bivalent formation during meiosis. Is specific to recom [...]
AT3G28960	UC	-4.01968	-2.32198	AVT1I	Amino acid transporter AVT1I.
AT3G29370	-2.57164	-3.54696	-1.79253	P1R3	Uncharacterized protein At3g29370/MUO10_8.
AT3G30530	UC	-2.93249	UC	bZIP42	Basic leucine-zipper 42.
AT3G32980	UC	-1.6924	UC	PER32	Peroxidase 32; Removal of H(2)O(2), oxidation of toxic reductants, biosynthesis and degradation of lignin, suberization, auxin catabolism, response to environmental stresses such as wounding, pa [...]
AT3G44350	UC	-2.53949	UC	NAC061	Putative NAC domain-containing protein 61.
AT3G44769	UC	-3.45022	UC	A0A1I9LPG2	Uncharacterized protein.
AT3G44940	UC	-3.91939	-2.11156	Q84JJ0_ARATH	Enabled-like protein (DUF1635).
AT3G44970	-3.95433	-5.04074	-3.16355	F4J4C0_ARATH	Cytochrome P450 superfamily protein; Belongs to the cytochrome P450 family.
AT3G45140	UC	-1.92756	UC	LOX2	Lipoxygenase 2, chloroplastic; 13S-lipoxygenase that can use linolenic acid as substrates. Plant lipoxygenases may be involved in a number of diverse aspects of plant physiology including growth [...]
AT3G46550	UC	-1.59972	UC	FLA4	Fasciclin-like arabinogalactan protein 4; May be a cell surface adhesion protein that is required for normal cell expansion; Belongs to the fasciclin-like AGP family.
AT3G46616	UC	-2.12475	UC	F4J956_ARATH	Uncharacterized protein.
AT3G47750	UC	-2.75868	-1.58934	ABCA4	ABC transporter A family member 4.
AT3G48540	UC	-2.49036	UC	Q1PEH3_ARATH	Cytidine/deoxycytidylate deaminase family protein.
AT3G49650	UC	-1.72734	UC	KIN8B	Kinesin-like protein KIN-8B; Belongs to the TRAFAC class myosin-kinesin ATPase superfamily. Kinesin family. KIN-8 subfamily.
AT3G51030	UC	-1.51507	UC	TRX1	Thioredoxin H1; Thiol-disulfide oxidoreductase involved in the redox regulation of a number of cytosolic enzymes. Activates the cytosolic malate dehydrogenase (MDH) probably by reducing an inter [...]
AT3G51060	UC	-2.67116	UC	SRS1	Protein SHI RELATED SEQUENCE 1; Transcription activator that binds DNA on 5'-ACTCTAC-3' and promotes auxin homeostasis-regulating gene expression (e.g. YUC genes), as well as genes affecting sta [...]
AT3G51230	UC	-3.46307	UC	Q6DYC8_ARATH	Chalcone-flavanone isomerase family protein.
AT3G51340	UC	-2.23808	UC	F26O13.2	Eukaryotic aspartyl protease family protein; Belongs to the peptidase A1 family.
AT3G51930	UC	-2.44601	UC	F4F15.40	Transducin/WD40 repeat-like superfamily protein.
AT3G52115	UC	-2.35824	UC	GR1	Protein gamma response 1; Seems to mediate cell cycle arrest before mitosis in response to DNA damage. Is probably also involved in the transition from mitosis to endoreduplication.
AT3G52370	UC	-1.70109	UC	FLA15	Fasciclin-like arabinogalactan protein 15; May be a cell surface adhesion protein; Belongs to the fasciclin-like AGP family.
AT3G52720	-3.45877	-4.85905	-3.20264	ACA1	Alpha carbonic anhydrase 1, chloroplastic; Reversible hydration of carbon dioxide; Belongs to the alpha-class carbonic anhydrase family.
AT3G53040	2.72761	UC	3.2546	F8J2_210	Late embryogenesis abundant protein At3g53040; May function in the proximal abscission zone cells to prevent water loss after floral organ shedding (Probable). May be involved in the reestablish [...]
AT3G53250	UC	-2.30133	UC	SAUR57	SAUR-like auxin-responsive protein family.
AT3G53680	UC	-4.06579	UC	A0A1I9LNX5	Acyl-CoA N-acyltransferase with RING/FYVE/PHD-type zinc finger domain-containing protein.
AT3G54510	UC	-2.36811	UC	T14E10_80	CSC1-like protein At3g54510; Acts as an osmosensitive calcium-permeable cation channel.
AT3G54600	UC	-1.67458	UC	DJ1F	DJ-1 protein homolog F; May be involved in oxidative stress response; Belongs to the peptidase C56 family.
AT3G54830	-5.25186	-6.60461	-4.14136	AVT1B	Amino acid transporter AVT1B.
AT3G54930	UC	-1.57721	UC	B'EPSILON	Serine/threonine protein phosphatase 2A 57 kDa regulatory subunit B' epsilon isoform; The B regulatory subunit may modulate substrate selectivity and catalytic activity, and also may direct the [...]
AT3G55370	UC	-1.52071	UC	DOF3.6	Dof zinc finger protein DOF3.6; Transcription factor that binds specifically to a 5'-AA[AG]G- 3' consensus core sequence. Enhances the DNA binding of OBF transcription factors to OCS elements.
AT3G55515	UC	-1.81601	UC	DVL8	ROTUNDIFOLIA like 7.
AT3G55646	UC	-4.5934	-3.24155	Q1G3N4_ARATH	TPRXL.
AT3G56230	UC	-2.46739	UC	F18O21_190	BTB/POZ domain-containing protein At3g56230; May act as a substrate-specific adapter of an E3 ubiquitin- protein ligase complex (CUL3-RBX1-BTB) which mediates the ubiquitination and subsequent p [...]
AT3G57157	UC	-2.97764	UC	- -	- -
AT3G57160	UC	-2.81735	UC	F24I3	Cysteine-rich and transmembrane domain-containing protein B.
AT3G57440	UC	-2.40971	UC	Q6DYC0_ARATH	Uncharacterized protein.
AT3G58120	-4.58181	-6.39975	-4.34104	BZIP61	Basic leucine zipper 61; Transcriptional activator.
AT3G58990	UC	-2.17413	UC	SSU3	3-isopropylmalate dehydratase small subunit 3; Catalyzes the isomerization between 2-isopropylmalate and 3- isopropylmalate, via the formation of 2-isopropylmaleate (Probable). Functions redunda [...]
AT3G59220	UC	-1.88249	UC	PRN1	Pirin-1; Involved in abscisic acid signal transduction. Plays a role in seed germination and early seedling development. Involved in the blue light (BL) signaling; Belongs to the pirin family.
AT3G60140	6.681	UC	7.40675	BGLU30	Beta-glucosidase 30; Belongs to the glycosyl hydrolase 1 family.
AT3G60150	1.4249	UC	1.68829	Q682I4_ARATH	NADH dehydrogenase ubiquinone 1 alpha subcomplex assembly factor-like protein (DUF498/DUF598).
AT3G60580	UC	-1.72523	UC	ZAT9	Zinc finger protein ZAT9; Probable transcription factor that may be involved in stress responses.
AT3G60650	UC	-2.406	UC	F4JBX1_ARATH	Transmembrane protein.
AT3G60890	UC	-3.55355	-1.84587	ZPR2	Protein LITTLE ZIPPER 2; Competitive inhibitor of the HD-ZIPIII transcription factors in shoot apical meristem (SAM) development. Acts by forming non- functional heterodimers. Part of a negative [...]
AT3G60990	UC	-2.73688	UC	T27I15_80	Glycosyltransferase family 92 protein; Belongs to the glycosyltransferase 92 family.
AT3G62950	UC	-1.54614	UC	GRXC11	Glutaredoxin-C11; Has a glutathione-disulfide oxidoreductase activity in the presence of NADPH and glutathione reductase. Reduces low molecular weight disulfides and proteins (By similarity); Be [...]
AT4G00400	-4.77371	-6.43081	-3.95389	GPAT8	Probable glycerol-3-phosphate acyltransferase 8; Esterifies acyl-group from acyl-ACP to the sn-1 position of glycerol-3-phosphate, an essential step in glycerolipid biosynthesis.
AT4G00820	UC	-3.69743	UC	iqd17	IQ-domain 17.
AT4G01700	UC	-1.54645	UC	T15B16.5	Chitinase family protein.
AT4G03400	UC	-1.84558	UC	GH3.10	Indole-3-acetic acid-amido synthetase GH3.10; Catalyzes the synthesis of indole-3-acetic acid (IAA)-amino acid conjugates, providing a mechanism for the plant to cope with the presence of excess [...]
AT4G04700	UC	-3.3857	-2.32376	CPK27	Calcium-dependent protein kinase 27; May play a role in signal transduction pathways that involve calcium as a second messenger; Belongs to the protein kinase superfamily. Ser/Thr protein kinase [...]
AT4G04830	-2.22287	-3.77041	-1.30676	MSRB5	Peptide methionine sulfoxide reductase B5; Catalyzes the reduction of methionine sulfoxide (MetSO) to methionine in proteins. Plays a protective role against oxidative stress by restoring activi [...]
AT4G06265	UC	-2.6864	UC	- -	- -
AT4G06955	UC	-2.63602	-1.36771	- -	- -
AT4G07820	UC	-2.29	UC	F5K24.6	Putative pathogenesis-related protein.
AT4G07960	UC	-1.82103	UC	CSLC12	Probable xyloglucan glycosyltransferase 12; Probable beta-1,4-glucan synthase rather involved in the synthesis of the xyloglucan backbone than cellulose. Seems to work simultaneously with xylogl [...]
AT4G08910	UC	-4.59813	UC	T3H13.6	Homeobox protein.
AT4G09240	UC	-2.9536	UC	- -	- -
AT4G09755	UC	-2.47104	UC	- -	- -
AT4G10160	UC	-3.59886	UC	ATL59	E3 ubiquitin-protein ligase ATL59; E3 ubiquitin-protein ligase able to catalyze polyubiquitination with ubiquitin-conjugating enzyme E2 UBC8, UBC10, UBC11, and UBC34 in vitro.
AT4G10290	UC	-3.74186	UC	- -	- -
AT4G10310	UC	-2.62837	UC	HKT1	Sodium transporter HKT1; Sodium transporter protein, which plays a central role in plant tolerance to salt. Upon prolongated exposure to high concentrations, Na(+) translocates from the roots to [...]
AT4G10630	UC	-3.45311	UC	F3H7.9	Glutaredoxin family protein.
AT4G11460	UC	-3.10521	UC	CRK30	Putative cysteine-rich receptor-like protein kinase 30.
AT4G12890	UC	-2.8146	UC	T20K18.240	Gamma interferon responsive lysosomal thiol (GILT) reductase family protein.
AT4G12900	UC	-1.76927	-0.672917	F25G13.3	Gamma interferon responsive lysosomal thiol (GILT) reductase family protein.
AT4G13710	UC	-2.79974	UC	F18A5.100	Probable pectate lyase 15.
AT4G14130	UC	-2.73766	UC	XTH15	Xyloglucan endotransglucosylase/hydrolase protein 15; Catalyzes xyloglucan endohydrolysis (XEH) and/or endotransglycosylation (XET). Cleaves and religates xyloglucan polymers, an essential const [...]
AT4G15430	UC	-2.77265	UC	dl3760w	CSC1-like protein At4g15430; Acts as an osmosensitive calcium-permeable cation channel.
AT4G15660	UC	-1.66965	UC	GRXS8	Monothiol glutaredoxin-S8; May only reduce GSH-thiol disulfides, but not protein disulfides; Belongs to the glutaredoxin family. CC-type subfamily.
AT4G16350	UC	-2.1339	UC	CBL6	Calcineurin B-like protein 6; Acts as a calcium sensor. CBL proteins interact with CIPK serine-threonine protein kinases. Binding of a CBL protein to the regulatory NAF domain of a CIPK protein [...]
AT4G16740	UC	-1.82897	UC	TPS03	Tricyclene synthase, chloroplastic; Predominantly involved in sesquiterpenes (C15) biosynthesis. Using FPP as substrate, the major product is (E,E)-alpha-farnesene with minor amounts of (Z,E)-al [...]
AT4G17905	UC	-2.77992	UC	ATL53	Putative RING-H2 finger protein ATL53; Belongs to the RING-type zinc finger family. ATL subfamily.
AT4G18260	UC	-3.79801	UC	T9A21.110	Cytochrome b561 domain-containing protein At4g18260.
AT4G18470	UC	-2.69894	UC	SNI1	Negative regulator of systemic acquired resistance SNI1; Component of the SMC5-SMC6 complex, a complex involved in repair of DNA double-strand breaks by homologous recombination. Transcription r [...]
AT4G18501	UC	-3.31897	UC	Q1G3I1_ARATH	Uncharacterized protein.
AT4G19030	UC	-2.06405	UC	NIP1-1	Aquaporin NIP1-1; Water channel probably required to promote glycerol permeability and water transport across cell membranes.
AT4G20230	UC	-3.31054	UC	TPS09	Terpenoid synthase 9; Involved in terpene biosynthesis in roots. Possesses diterpene (C20) synthase activity in vitro. Does not seem to be involved in sesquiterpene (C15) biosynthesis.
AT4G20362	UC	-1.89335	UC	- -	- -
AT4G21310	UC	-1.63813	UC	T6K22.40	Transmembrane protein, putative (DUF1218).
AT4G21760	UC	-2.38035	UC	BGLU47	Beta-glucosidase 47.
AT4G21926	UC	-2.14588	UC	B3H4V5_ARATH	Uncharacterized protein.
AT4G22790	UC	-2.52543	UC	DTX56	Protein DETOXIFICATION 56; Could function as a HCO(3)(-) -sensing component in the CO(2) signaling pathway in guard cells. Acts as an upsteam repressor of HT1. Plays a role in stomatal response [...]
AT4G23130	UC	-3.8381	-2.09874	CRK5	Cysteine-rich receptor-like protein kinase 5; Involved in multiple distinct defense responses. May function as a disease resistance (R) protein; Belongs to the protein kinase superfamily. Ser/Th [...]
AT4G23210	UC	-3.56778	UC	CRK13	Cysteine-rich receptor-like protein kinase 13; Belongs to the protein kinase superfamily. Ser/Thr protein kinase family. CRK subfamily.
AT4G24015	UC	-1.55753	UC	RHA4A	Probable E3 ubiquitin-protein ligase RHA4A; Probable E3 ubiquitin-protein ligase that may possess E3 ubiquitin ligase activity in vitro.
AT4G24110	UC	-1.63221	UC	T19F6.9	NADP-specific glutamate dehydrogenase.
AT4G24140	UC	-2.54548	UC	BDG3	Probable lysophospholipase BODYGUARD 3; Involved in cuticle development and morphogenesis.
AT4G24250	UC	-3.21456	UC	MLO13	MLO-like protein 13; May be involved in modulation of pathogen defense and leaf cell death. Activity seems to be regulated by Ca(2+)-dependent calmodulin binding and seems not to require heterot [...]
AT4G25240	-3.94649	-5.33674	-3.45229	SKS1	Monocopper oxidase-like protein SKS1; Belongs to the multicopper oxidase family.
AT4G25420	-2.44059	-4.06741	-1.26709	GA20OX1	Gibberellin 20 oxidase 1; Key oxidase enzyme in the biosynthesis of gibberellin that catalyzes the conversion of GA12 and GA53 to GA9 and GA20 respectively, via a three-step oxidation at C-20 of [...]
AT4G26580	1.99256	UC	1.9201	T15N24.30	RING/U-box superfamily protein.
AT4G26830	UC	-2.57952	UC	F10M23.170	O-Glycosyl hydrolases family 17 protein; Belongs to the glycosyl hydrolase 17 family.
AT4G28140	UC	-1.52707	UC	ERF054	Ethylene-responsive transcription factor ERF054; Probably acts as a transcriptional activator. Binds to the GCC-box pathogenesis-related promoter element. May be involved in the regulation of ge [...]
AT4G28180	UC	-3.24385	-1.24531	F26K10.60	At4g28180.
AT4G28500	UC	-2.94221	UC	NAC073	NAC domain-containing protein 73; Transcriptional activator that plays a regulatory role in the development of secondary cell wall fibers. Involved in the regulation of cellulose and hemicellulo [...]
AT4G28680	-1.86247	-4.02951	UC	TYRDC	Probable tyrosine decarboxylase 2; Belongs to the group II decarboxylase family.
AT4G29610	-4.80613	-6.08295	-3.72062	CDA6	Cytidine deaminase 6; This enzyme scavenges exogenous and endogenous cytidine and 2'-deoxycytidine for UMP synthesis.
AT4G29690	UC	-2.54661	UC	T16L4.200	Alkaline-phosphatase-like family protein.
AT4G29700	-2.56496	-4.26671	-1.7152	T16L4.210	Alkaline-phosphatase-like family protein.
AT4G30090	UC	-2.85106	UC	F6G3.120	Golgin family A protein.
AT4G30170	UC	-2.66797	UC	PER45	Peroxidase 45; Removal of H(2)O(2), oxidation of toxic reductants, biosynthesis and degradation of lignin, suberization, auxin catabolism, response to environmental stresses such as wounding, pa [...]
AT4G30270	-2.99211	-4.65852	-3.04526	XTH24	Xyloglucan endotransglucosylase/hydrolase protein 24; Catalyzes xyloglucan endohydrolysis (XEH) and/or endotransglycosylation (XET). Cleaves and religates xyloglucan polymers, an essential const [...]
AT4G30280	-3.9021	-5.91009	-4.00084	XTH18	Probable xyloglucan endotransglucosylase/hydrolase protein 18; Catalyzes xyloglucan endohydrolysis (XEH) and/or endotransglycosylation (XET). Cleaves and religates xyloglucan polymers, an essent [...]
AT4G30290	UC	-4.31514	UC	XTH19	Xyloglucan endotransglucosylase/hydrolase protein 19; Possesses xyloglucan endotransglucosylase (XET) activity in vitro. Does not possess xyloglucan endohydrolysis (XEH) activity. Cleaves and re [...]
AT4G30520	UC	-1.52981	UC	SARK	Probable LRR receptor-like serine/threonine-protein kinase At4g30520; Belongs to the protein kinase superfamily. Ser/Thr protein kinase family.
AT4G32000	UC	-1.53384	UC	F10N7.190	Protein kinase superfamily protein; Belongs to the protein kinase superfamily.
AT4G32570	UC	-1.72101	UC	TIFY8	Protein TIFY 8; Repressor of jasmonate responses.
AT4G32890	UC	-2.80883	UC	GATA9	GATA transcription factor 9; Transcriptional activator that specifically binds 5'-GATA-3' or 5'-GAT-3' motifs within gene promoters. May be involved in the regulation of some light-responsive ge [...]
AT4G33070	UC	-1.65726	UC	PDC1	Pyruvate decarboxylase 1; May play a role in ethanolic fermentation during anoxia. Belongs to the TPP enzyme family.
AT4G34138	UC	-2.29735	UC	UGT73B1	UDP-glycosyltransferase 73B1; Possesses low quercetin 3-O-glucosyltransferase and 7-O- glucosyltransferase activities in vitro; Belongs to the UDP-glycosyltransferase family.
AT4G34420	UC	-2.30943	UC	F10M10.190	P-loop containing nucleoside triphosphate hydrolases superfamily protein.
AT4G34800	UC	-3.35236	UC	T11I11.40	SAUR-like auxin-responsive protein family.
AT4G34900	UC	-2.28499	UC	XDH2	Xanthine dehydrogenase 2; Key enzyme involved in purine catabolism. Catalyzes the oxidation of hypoxanthine to xanthine and the oxidation of xanthine to urate. Regulates the level of ureides and [...]
AT4G34930	UC	-2.94615	UC	T11I11.170	PLC-like phosphodiesterases superfamily protein.
AT4G35390	UC	-1.88763	UC	AHL25	AT-hook motif nuclear-localized protein 25; Transcription factor that specifically binds AT-rich DNA sequences related to the nuclear matrix attachment regions (MARs) (By similarity). Binds the [...]
AT4G36930	1.14502	UC	2.21868	SPT	Transcription factor SPATULA; Transcription factor that plays a role in floral organogenesis. Promotes the growth of carpel margins and of pollen tract tissues derived from them.
AT4G37750	-2.40757	-4.09597	-2.02226	ANT	AP2-like ethylene-responsive transcription factor ANT; Transcription activator that recognizes and binds to the DNA consensus sequence 5'-CAC[AG]N[AT]TNCCNANG-3'. Required for the initiation and [...]
AT4G37770	-4.65874	-6.28978	-4.84382	ACS8	1-aminocyclopropane-1-carboxylate synthase 8; 1-aminocyclopropane-1-carboxylate synthase (ACS) enzymes catalyze the conversion of S-adenosyl-L-methionine (SAM) into 1- aminocyclopropane-1-carbox [...]
AT4G37800	-3.68746	-5.30503	-3.74798	XTH7	Probable xyloglucan endotransglucosylase/hydrolase protein 7; Catalyzes xyloglucan endohydrolysis (XEH) and/or endotransglycosylation (XET). Cleaves and religates xyloglucan polymers, an essenti [...]
AT4G37970	2.03639	UC	2.35471	CAD6	Probable cinnamyl alcohol dehydrogenase 6; Involved in lignin biosynthesis. Catalyzes the final step specific for the production of lignin monomers. Catalyzes the NADPH- dependent reduction of c [...]
AT4G39675	UC	-3.34702	UC	Q8LEP7_ARATH	At4g39675.
AT5G00855	1.97821	UC	1.91461	- -	- -
AT5G01620	UC	-2.02837	UC	TBL35	Protein trichome birefringence-like 35; May act as a bridging protein that binds pectin and other cell wall polysaccharides. Probably involved in maintaining esterification of pectins (By simila [...]
AT5G02440	UC	-1.71661	UC	T22P11.30	60S ribosomal protein L36.
AT5G02515	UC	-2.03998	UC	- -	- -
AT5G03355	-3.5529	-5.56973	-4.43149	- -	- -
AT5G03640	2.52413	UC	2.69323	F17C15.60	Protein kinase superfamily protein.
AT5G03960	UC	-1.8429	UC	IQD12	IQ-domain 12.
AT5G04065	3.01394	UC	2.60035	- -	- -
AT5G04180	UC	-3.24494	UC	ACA3	Alpha carbonic anhydrase 3; Reversible hydration of carbon dioxide.
AT5G04310	-3.18347	-4.87873	-3.08589	T19N18.40	Pectate lyase.
AT5G05880	2.45596	UC	1.86983	UGT76C4	UDP-glycosyltransferase 76C4; Belongs to the UDP-glycosyltransferase family.
AT5G05965	1.95372	UC	3.1012	Q5XV49_ARATH	Cell wall RBR3-like protein.
AT5G06250	UC	-2.53141	UC	DPA4	B3 domain-containing protein At5g06250.
AT5G06380	UC	-2.04897	UC	MHF15.10	Gb|AAF02136.1.
AT5G06570	UC	-3.37991	-2.3289	CXE15	Probable carboxylesterase 15; Carboxylesterase acting on esters with varying acyl chain length.
AT5G06720	UC	-2.58455	UC	PER53	Peroxidase 53; Removal of H(2)O(2), oxidation of toxic reductants, biosynthesis and degradation of lignin, suberization, auxin catabolism, response to environmental stresses such as wounding, pa [...]
AT5G06790	UC	-2.21813	UC	MPH15.15	Cotton fiber protein.
AT5G06800	UC	-2.96869	UC	PHL5	Myb family transcription factor PHL5; Belongs to the MYB-CC family.
AT5G07175	UC	-1.60063	UC	A0A1P8BBB8	Uncharacterized protein.
AT5G07660	UC	-2.76736	-1.62216	SMC6A	Structural maintenance of chromosomes protein 6A; Core component of the SMC5-SMC6 complex that promotes sister chromatid alignment after DNA damage and facilitates double-stranded DNA breaks (DS [...]
AT5G07810	UC	-3.24641	UC	MXM12.5	annotation not available
AT5G09195	2.10514	UC	2.57319	- -	- -
AT5G09970	UC	-1.69985	UC	CYP78A7	Cytochrome P450 78A7; Functions probably in association with CYP78A5 in regulating relative growth of the shoot apical meristem and plant organs via a non-cell-autonomous signal; Belongs to the [...]
AT5G10310	UC	-1.6399	UC	EPFL1	EPIDERMAL PATTERNING FACTOR-like protein 1; Controls stomatal patterning; Belongs to the plant cysteine rich small secretory peptide family. Epidermal patterning factor subfamily.
AT5G10520	UC	-1.86622	UC	RBK1	Receptor-like cytosolic serine/threonine-protein kinase RBK1; Belongs to the protein kinase superfamily. Ser/Thr protein kinase family.
AT5G11410	UC	-3.32152	UC	F2I11_300	Protein kinase superfamily protein.
AT5G11930	UC	-1.67666	UC	GRXC10	Glutaredoxin-C10; Has a glutathione-disulfide oxidoreductase activity in the presence of NADPH and glutathione reductase. Reduces low molecular weight disulfides and proteins (By similarity); Be [...]
AT5G12030	3.65201	UC	2.26192	HSP17.7	17.7 kDa class II heat shock protein; Belongs to the small heat shock protein (HSP20) family.
AT5G12300	UC	-2.70691	UC	Q94CL2_ARATH	Calcium-dependent lipid-binding (CaLB domain) family protein.
AT5G12970	UC	-3.47046	UC	T24H18.140	Calcium-dependent lipid-binding (CaLB domain) plant phosphoribosyltransferase family protein.
AT5G13130	UC	-4.12368	UC	MORC5	Protein MICRORCHIDIA 5; Exhibits ATPase activity. Binds DNA/RNA in a non-specific manner and exhibits endonuclease activity. Probably involved in DNA repair. Involved in RNA-directed DNA methyla [...]
AT5G14100	UC	-2.91305	UC	ABCI11	ABC transporter I family member 11, chloroplastic.
AT5G14150	UC	-1.64285	UC	MUA22.15	Emb|CAB87702.1.
AT5G14470	UC	-2.64733	UC	GLCAK2	Probable glucuronokinase 2; Sugar-1-kinase with a strict substrate specificity for D- glucuronic acid and ATP. Involved in the biosynthesis of UDP-glucuronic acid (UDP-GlcA), providing nucleotid [...]
AT5G14690	UC	-2.53399	-1.30953	T15N1_180	Transmembrane protein.
AT5G15150	UC	-2.48205	UC	HAT7	Homeobox-leucine zipper protein HAT7; Probable transcription factor.
AT5G15600	UC	-4.05615	-2.92655	SP1L4	Protein SPIRAL1-like 4; Acts redundantly with SPR1 in maintaining the cortical microtubules organization essential for anisotropic cell growth. Belongs to the SPIRAL1 family.
AT5G16023	UC	-3.85826	UC	RTFL18	ROTUNDIFOLIA like 18.
AT5G16080	UC	-3.32293	UC	CXE17	Probable carboxylesterase 17; Carboxylesterase acting on esters with varying acyl chain length.
AT5G19110	UC	-4.49032	UC	T24G5.10	Eukaryotic aspartyl protease family protein; Belongs to the peptidase A1 family.
AT5G19600	UC	-4.42809	-2.65442	SULTR3;5	Probable sulfate transporter 3.5; H(+)/sulfate cotransporter that may play a role in the regulation of sulfate assimilation; Belongs to the SLC26A/SulP transporter (TC 2.A.53) family.
AT5G20870	UC	-3.67904	UC	F22D1.40	O-Glycosyl hydrolases family 17 protein; Belongs to the glycosyl hydrolase 17 family.
AT5G22490	UC	-2.84034	UC	MQJ16.3	O-acyltransferase (WSD1-like) family protein.
AT5G22870	UC	-2.70624	UC	MRN17.10	Late embryogenesis abundant (LEA) hydroxyproline-rich glycoprotein family.
AT5G23020	UC	-3.38004	-2.16451	MAM3	Methylthioalkylmalate synthase 3, chloroplastic; Determines the side chain length of aliphatic glucosinolate structures. Accepts all the omega-methylthio-2-oxoalkanoic acids needed to form the k [...]
AT5G23510	UC	-1.5657	UC	MQM1.23	Uncharacterized protein.
AT5G23830	UC	-2.17243	UC	MRO11.13	MD-2-related lipid recognition domain-containing protein.
AT5G24290	UC	-3.18405	UC	MEB2	Membrane protein of ER body 2; May sequester excess cytosolic iron and manganese into endoplasmic reticulum to reduce metal ion toxicity. Not essential for the accumulation of ER body components [...]
AT5G24420	UC	-2.53662	UC	PGL5	Probable 6-phosphogluconolactonase 5; Catalyzes the hydrolysis of 6-phosphogluconolactone to 6- phosphogluconate.
AT5G25130	1.7542	UC	1.56424	CYP71B12	Cytochrome P450 71B12; Belongs to the cytochrome P450 family.
AT5G25880	UC	-1.8816	UC	NADP-ME3	NADP-dependent malic enzyme 3.
AT5G26330	UC	-1.52355	UC	F9D12.16	Copper binding protein-like, predicted GPI-anchored protein.
AT5G27000	UC	-1.81391	UC	KIN14G	Kinesin-like protein KIN-14G; Microtubule-binding motor protein; Belongs to the TRAFAC class myosin-kinesin ATPase superfamily. Kinesin family. KIN-14 subfamily.
AT5G28020	UC	-1.94374	UC	CYSD2	Bifunctional L-3-cyanoalanine synthase/cysteine synthase D2; Acts as a cysteine synthase. The cysteine synthesis reaction is more efficient than the cyanoalanine synthase activity.
AT5G28030	UC	-1.52996	UC	DES1	Bifunctional cystathionine gamma-lyase/cysteine synthase; Involved in maintaining Cys homeostasis through the desulfuration of L-cysteine. Modulates the generation of the signaling molecule sulf [...]
AT5G28610	UC	-3.55716	UC	T10I18.2	LOW protein: ATP-dependent RNA helicase DRS1-like protein.
AT5G33300	UC	-1.97343	UC	F19N2.20	Chromosome-associated kinesin-like protein.
AT5G35525	UC	-4.44639	UC	PCR3	Protein PLANT CADMIUM RESISTANCE 3; May be involved in heavy metals transport; Belongs to the cornifelin family.
AT5G36920	UC	-3.27971	UC	MLF18.6	Transmembrane protein.
AT5G37660	UC	-2.31829	UC	PDLP7	Plasmodesmata-located protein 7; Modulates cell-to-cell trafficking.
AT5G38120	UC	-1.67022	UC	4CLL8	4-coumarate--CoA ligase-like 8.
AT5G38770	UC	-2.36141	UC	GDU7	Protein GLUTAMINE DUMPER 7; Probable subunit of an amino acid transporter involved in the regulation of the amino acid metabolism. Stimulates amino acid export by activating nonselective amino a [...]
AT5G38930	UC	-2.78839	UC	K15E6.16	Germin-like protein subfamily 1 member 10; May play a role in plant defense. Probably has no oxalate oxidase activity even if the active site is conserved.
AT5G39860	-4.63015	-7.42414	-6.41283	PRE1	Transcription factor PRE1; Atypical and probable non DNA-binding bHLH transcription factor that integrates multiple signaling pathways to regulate cell elongation and plant development. Binds IB [...]
AT5G39970	UC	-2.29	UC	MYH19.17	Catalytics.
AT5G40180	UC	-2.9645	UC	MSN9.8	Pmr5/Cas1p GDSL/SGNH-like acyl-esterase family protein.
AT5G40510	2.68375	UC	2.85031	MNF13.5	Sucrase/ferredoxin-like family protein.
AT5G41590	UC	-2.16028	UC	MBK23.11	Protein LURP-one-related 17; Might be related to the phospholipid scramblase and tubby- like superfamily of membrane tethered transcription factors.
AT5G42180	UC	-2.69457	UC	PER64	Peroxidase 64; Removal of H(2)O(2), oxidation of toxic reductants, biosynthesis and degradation of lignin, suberization, auxin catabolism, response to environmental stresses such as wounding, pa [...]
AT5G42930	3.19466	UC	2.96914	MBD2.13	Alpha/beta-Hydrolases superfamily protein.
AT5G43040	UC	-2.16204	UC	MMG4.5	Cysteine/Histidine-rich C1 domain family protein.
AT5G44020	-7.42028	-8.4394	-6.53799	MRH10.13	HAD superfamily, subfamily IIIB acid phosphatase.
AT5G45000	UC	-2.892	UC	K21C13.19	Disease resistance protein (TIR-NBS-LRR class) family.
AT5G45455	UC	-1.88016	UC	A0A1P8BCS3	Uncharacterized protein.
AT5G45540	UC	-1.72224	UC	MFC19.21	Transmembrane protein, putative (DUF594).
AT5G45840	-1.49392	-3.50531	UC	MDIS1	Protein MALE DISCOVERER 1; Involved in the pollen tube perception of the female signal. Belongs to the protein kinase superfamily. Ser/Thr protein kinase family.
AT5G46140	UC	-2.2954	UC	MCL19.20	DUF295 domain-containing protein.
AT5G48690	UC	-2.57755	UC	K24G6.2	Ubiquitin-associated (UBA)/TS-N domain protein.
AT5G48940	UC	-2.63541	UC	RCH1	LRR receptor-like serine/threonine-protein kinase RCH1.
AT5G49390	UC	-2.23474	UC	K7J8.6	Serine/threonine-protein phosphatase 4 regulatory subunit-like protein.
AT5G49570	UC	-1.74465	UC	PNG1	Peptide-N(4)-(N-acetyl-beta-glucosaminyl)asparagine amidase; Specifically deglycosylates the denatured form of N-linked glycoproteins in the cytoplasm and assists their proteasome-mediated degra [...]
AT5G50060	UC	-2.82071	UC	MPF21.7	Plant invertase/pectin methylesterase inhibitor superfamily protein.
AT5G50150	UC	-3.05321	-0.972303	MPF21.18	NEP-interacting protein, putative (DUF239).
AT5G50290	UC	-1.60469	UC	K6A12.15	Wall-associated receptor kinase galacturonan-binding protein.
AT5G51470	UC	-2.29	UC	K17N15.2	Auxin-responsive GH3 family protein.
AT5G51480	UC	-2.93502	UC	SKS2	Monocopper oxidase-like protein SKS2; Belongs to the multicopper oxidase family.
AT5G51790	UC	-1.68937	UC	BHLH120	Transcription factor bHLH120.
AT5G51850	-3.07917	-5.34801	-2.65804	TRM24	Emb|CAB81354.1.
AT5G52100	UC	-2.5065	UC	DAPB3	Dihydrodipicolinate reductase-like protein CRR1, chloroplastic; Dihydrodipicolinate reductase (DHPR)-like protein that may not function as DHPR in lysine biosynthesis. Required for both formatio [...]
AT5G54148	UC	-5.01098	-3.93354	F4JYU9_ARATH	Sarcosine dehydrogenase-2C protein.
AT5G54670	UC	-1.92323	UC	KIN14N	Kinesin-like protein KIN-14N.
AT5G55330	UC	-1.64285	UC	AT6	Probable long-chain-alcohol O-fatty-acyltransferase 6; Catalyzes the final step in the synthesis of long-chain linear esters (waxes).
AT5G55480	-3.12519	-4.35537	-2.62035	GDPDL4	Glycerophosphodiester phosphodiesterase GDPDL4; Involved in primary cell wall organization. Required for the accumulation of crystalline cellulose; Belongs to the glycerophosphoryl diester phosp [...]
AT5G55930	UC	-1.51167	UC	OPT1	Oligopeptide transporter 1; Involved in the translocation of tetra- and pentapeptides across the cellular membrane in an energy-dependent manner.
AT5G56840	-4.31922	-6.06417	-4.6047	MIK19.31	Similarity to Myb-related transcription activator.
AT5G56870	UC	-5.9099	-2.91553	BGAL4	Beta-galactosidase 4; Preferentially hydrolyzes para-nitrophenyl-beta-D- galactoside. Can hydrolyze para-nitrophenyl-beta-D-fucoside with 5 time less efficiency; Belongs to the glycosyl hydrolas [...]
AT5G57130	UC	-2.34697	UC	SMXL5	Protein SMAX1-LIKE 5; May function in a transcriptional corepressor complex.
AT5G57530	UC	-1.80851	UC	XTH12	Probable xyloglucan endotransglucosylase/hydrolase protein 12; Catalyzes xyloglucan endohydrolysis (XEH) and/or endotransglycosylation (XET). Cleaves and religates xyloglucan polymers, an essent [...]
AT5G57640	UC	-2.08845	UC	MUA2.23	GCK domain-containing protein.
AT5G57650	UC	-1.89652	UC	MUA2.24	Eukaryotic translation initiation factor-like protein.
AT5G58360	UC	-2.06405	UC	OFP3	Transcription repressor OFP3; Transcriptional repressor that may regulate multiple aspects of plant growth and development through the regulation of BEL1-LIKE (BLH) and KNOX TALE (KNAT) homeodom [...]
AT5G58760	2.1591	UC	1.87373	DDB2	Protein DAMAGED DNA-BINDING 2; May function as the substrate recognition module for a DCX (DDB1-CUL4-X-box) E3 ubiquitin-protein ligase complex including DDB1A and CUL4 (By similarity). Required [...]
AT5G59680	-2.82754	-4.43705	-2.04966	MTH12.14	Probable LRR receptor-like serine/threonine-protein kinase At5g59680; Belongs to the protein kinase superfamily. Ser/Thr protein kinase family.
AT5G59780	1.84639	UC	2.1542	MYB59	Transcription factor MYB59; Transcription factor.
AT5G59895	UC	-1.64285	UC	A0A1P8BH47	Uncharacterized protein.
AT5G59990	UC	-2.34645	UC	MMN10.24	CCT motif family protein.
AT5G60285	UC	-1.85747	UC	- -	- -
AT5G60490	UC	-3.97215	UC	FLA12	Fasciclin-like arabinogalactan protein 12; May be a cell surface adhesion protein; Belongs to the fasciclin-like AGP family.
AT5G60660	UC	-2.93094	UC	PIP2-4	Probable aquaporin PIP2-4, N-terminally processed; Aquaporins facilitate the transport of water and small neutral solutes across cell membranes; Belongs to the MIP/aquaporin (TC 1.A.8) family. P [...]
AT5G60880	UC	-3.5671	UC	BASL	Protein BREAKING OF ASYMMETRY IN THE STOMATAL LINEAGE; Regulates asymmetric cell division (ACD), especially in stomatal-lineage cells, probably by modulating accumulation and subcellular polariz [...]
AT5G60890	UC	-1.68652	UC	MYB34	Transcription factor MYB34; Transcription factor involved in tryptophan gene activation and in indole-3-acetic acid (IAA) and indolic glucosinolates (IG) biosynthesis. Acts as a direct transcrip [...]
AT5G61200	UC	-1.68532	UC	MAF19.20	Myosin heavy chain-like protein.
AT5G61730	UC	-1.64285	UC	ABCA9	ABC transporter A family member 9; Mediates the transport of acyl-CoAs and/or free fatty acids to the endoplasmic reticulum. Has no effect on the selectivity of fatty acid incorporation into tri [...]
AT5G62840	UC	-2.40954	-0.696184	MQB2.16	Phosphoglycerate mutase family protein.
AT5G64450	2.72683	UC	1.03817	T12B11.4	NYN domain protein.
AT5G65390	-5.31406	-7.28629	-5.64412	AGP7	Classical arabinogalactan protein 7; Proteoglycan that seems to be implicated in diverse developmental roles such as differentiation, cell-cell recognition, embryogenesis and programmed cell dea [...]
AT5G65510	UC	-2.68828	UC	AIL7	AP2-like ethylene-responsive transcription factor AIL7; Probably acts as a transcriptional activator. Binds to the GCC-box pathogenesis-related promoter element. May be involved in the regulatio [...]
AT5G65683	UC	-1.61395	UC	WAVH2	Probable E3 ubiquitin-protein ligase WAVH2; Probable E3 ubiquitin-protein ligase involved in the regulation of root growth. Acts as positive regulator of root gravitropism.
AT5G65730	-6.80159	-7.8808	-5.85615	XTH6	Probable xyloglucan endotransglucosylase/hydrolase protein 6; Catalyzes xyloglucan endohydrolysis (XEH) and/or endotransglycosylation (XET). Cleaves and religates xyloglucan polymers, an essenti [...]
AT5G65800	UC	-2.1339	UC	ACS5	1-aminocyclopropane-1-carboxylate synthase 5; 1-aminocyclopropane-1-carboxylate synthase (ACS) enzymes catalyze the conversion of S-adenosyl-L-methionine (SAM) into 1- aminocyclopropane-1-carbox [...]
AT5G66230	UC	-3.01584	-1.66001	CHI2	Chalcone--flavonone isomerase 2; Catalyzes the intramolecular cyclization of bicyclic chalcones into tricyclic (S)-flavanones. Responsible for the isomerization of 4,2',4',6'-tetrahydroxychalcon [...]
AT5G66640	UC	-3.40374	UC	DAR3	Protein DA1-related 3.
AT5G66740	UC	-1.88998	UC	MSN2.13	Spindle assembly abnormal protein (DUF620).
ATCG00480	UC	-1.6822	UC	atpB	ATP synthase subunit beta, chloroplastic; Produces ATP from ADP in the presence of a proton gradient across the membrane. The catalytic sites are hosted primarily by the beta subunits; Belongs t [...]
ATCG01270	UC	-2.53367	UC	ycf15-A	Uncharacterized protein ycf15.
ATMG00516	1.85	UC	2.08079	- -	- -

## Sheet: Cluster 3
Gene_ ID	Log2FC WT	log2FC 10b	Log2FC OX-1	Gene Name	Annotation /Function
AT1G01190	-3.28806	-4.23829	UC	CYP78A8	Cytochrome P450, family 78, subfamily A, polypeptide 8; Belongs to the cytochrome P450 family.
AT1G01390	-4.28565	-4.4916	-1.8247	UGT72B2	UDP-glycosyltransferase 72B2; Belongs to the UDP-glycosyltransferase family.
AT1G01453	UC	UC	2.46608	F4HSB6_ARATH	Late embryogenesis abundant hydroxyproline-rich glycoprotein family protein.
AT1G01840	UC	UC	3.32493	T1N6.26	AP2-like ethylene-responsive transcription factor SNZ.
AT1G01900	-3.60174	-3.85622	UC	SBTI1.1	Subtilisin-like protease SBT1.1; Serine protease that cleaves the phytosulfokines PSK3, PSK2 and PSK5 in vitro. Phytosulfokines are plant growth factors or peptide hormones that promotes plant c [...]
AT1G02340	-2.51611	-2.56354	UC	HFR1	Transcription factor HFR1; Atypical bHLH transcription factor that regulates photomorphogenesis through modulation of phytochrome (e.g. PHYA) and cryptochrome signalings (Ref.4,. Suppresses the [...]
AT1G02360	-7.38773	-7.00526	-5.4836	T6A9.5	Chitinase family protein.
AT1G02630	-2.94445	-3.56367	UC	ETN8	Equilibrative nucleotide transporter 8; May be involved in nucleoside transport.
AT1G02810	-2.61465	-3.27625	UC	PME7	Probable pectinesterase/pectinesterase inhibitor 7; Acts in the modification of cell walls via demethylesterification of cell wall pectin; In the C-terminal section; belongs to the pectinesteras [...]
AT1G02813	UC	UC	3.0697	F4HXM8_ARATH	Uncharacterized protein.
AT1G03130	-1.56728	-2.58883	UC	PSAD2	Photosystem I reaction center subunit II-2, chloroplastic; PSAD can form complexes with ferredoxin and ferredoxin- oxidoreductase in photosystem I (PS I) reaction center. PSAD may encode the fer [...]
AT1G03660	-2.71073	-2.85053	UC	F21B7.26	Ankyrin-repeat containing protein.
AT1G03850	-3.32361	-1.41606	UC	GRXS13	Monothiol glutaredoxin-S13; May only reduce GSH-thiol disulfides, but not protein disulfides.
AT1G04020	-2.8391	-2.39329	UC	BARD1	BRCA1-associated RING domain protein 1; Binds specifically to H3K4me3 regions of target genes (e.g. WUS and WOX5) promoters to repress their transcription via chromatin remodeling. Required for [...]
AT1G04760	-2.67651	-2.62032	UC	VAMP726	Putative vesicle-associated membrane protein 726; Involved in the targeting and/or fusion of transport vesicles to their target membrane.
AT1G05300	-2.1152	-2.01504	UC	ZIP5	Zinc transporter 5; Probably mediates zinc uptake from the rhizosphere. Belongs to the ZIP transporter (TC 2.A.5) family.
AT1G05675	-4.14978	-5.48381	UC	UGT74E1	UDP-glycosyltransferase 74E1; Belongs to the UDP-glycosyltransferase family.
AT1G06100	-3.63109	-2.80757	UC	T21E18.15	Delta-9 desaturase-like 2 protein; Belongs to the fatty acid desaturase type 1 family.
AT1G06217	UC	UC	2.56659	- -	- -
AT1G06350	-3.73176	-3.18773	UC	ADS4	Delta-9 desaturase-like 4 protein; Belongs to the fatty acid desaturase type 1 family.
AT1G06520	UC	UC	2.10207	GPAT1	Glycerol-3-phosphate acyltransferase 1; Esterifies acyl-group from acyl-ACP to the sn-1 position of glycerol-3-phosphate, an essential step in glycerolipid biosynthesis. Involved in pollen devel [...]
AT1G06977	UC	UC	1.91792	- -	- -
AT1G07120	UC	UC	3.32126	F10K1.18	CHUP1-like protein.
AT1G07880	-3.74582	-2.14045	UC	MPK13	Mitogen-activated protein kinase 13; MKK6-MPK13 module positively regulates lateral root formation; Belongs to the protein kinase superfamily. CMGC Ser/Thr protein kinase family. MAP kinase subf [...]
AT1G08080	UC	UC	3.25233	ACA7-2	Alpha carbonic anhydrase 7; Reversible hydration of carbon dioxide.
AT1G08160	-2.95535	-3.22141	UC	T23G18.2	Uncharacterized protein At1g08160.
AT1G08340	UC	UC	1.72664	ROPGAP5	Rho GTPase-activating protein 5; Acts as a GTPase activator for the Rac-type GTPase by converting it to an inactive GDP-bound state.
AT1G08440	UC	2.10699	3.18508	ALMT2	Aluminum-activated malate transporter 2; Malate transporter.
AT1G09440	UC	UC	1.67135	F14J9.10	Protein kinase superfamily protein; Belongs to the protein kinase superfamily.
AT1G09932	-3.51208	-2.50009	UC	Q8GWG7_ARATH	Phosphoglycerate mutase family protein.
AT1G10210	UC	UC	1.70206	MPK1	Mitogen-activated protein kinase 1.
AT1G10340	-3.58804	-3.51602	UC	F14N23.22	Ankyrin repeat family protein.
AT1G10460	-3.40274	-4.76325	UC	GLP7	Germin-like protein subfamily 1 member 1; May play a role in plant defense. Probably has no oxalate oxidase activity even if the active site is conserved.
AT1G10490	UC	UC	1.62184	T10O24.10	RNA cytidine acetyltransferase 1; RNA cytidine acetyltransferase with specificity toward both 18S rRNA and tRNAs. Catalyzes the formation of N(4)-acetylcytidine (ac4C) in 18S rRNA. Required for [...]
AT1G10560	-1.46527	-1.87645	UC	PUB18	U-box domain-containing protein 18; Functions as an E3 ubiquitin ligase (By similarity). Mediates EXO70B1 ubiquitination. Involved in the regulation of abscisic acid (ABA)-mediated stomatal move [...]
AT1G10640	-3.58781	-5.17105	UC	F20B24.8	Pectin lyase-like superfamily protein.
AT1G10770	-3.97154	-3.36645	UC	T16B5.9	Plant invertase/pectin methylesterase inhibitor superfamily protein.
AT1G10800	UC	UC	2.61612	T16B5.6	Voltage-gated hydrogen channel-like protein.
AT1G11080	-1.70395	-1.76522	UC	SCPL31	Serine carboxypeptidase-like 31; Probable carboxypeptidase; Belongs to the peptidase S10 family.
AT1G11120	-2.61246	-1.68789	UC	T19D16.22	CTTNBP 2 amino-terminal-like protein.
AT1G11230	UC	UC	2.70781	T28P6.11	Transmembrane protein, putative (DUF761).
AT1G11450	-2.64811	-2.62625	UC	UMAMIT27	WAT1-related protein At1g11450; Belongs to the drug/metabolite transporter (DMT) superfamily. Plant drug/metabolite exporter (P-DME) (TC 2.A.7.4) family.
AT1G11600	-2.47011	-1.81287	UC	CYP77B1	Cytochrome P450, family 77, subfamily B, polypeptide 1; Belongs to the cytochrome P450 family.
AT1G11670	-3.12799	-2.22661	UC	DTX36	Protein DETOXIFICATION 36.
AT1G11730	-3.10916	-2.33138	UC	B3GALT1	Probable beta-1,3-galactosyltransferase 1; Beta-1,3-galactosyltransferase that transfers galactose from UDP-galactose to substrates with a terminal glycosyl residue. Belongs to the glycosyltrans [...]
AT1G12240	-1.53394	-1.73312	UC	BFRUCT4	Acid beta-fructofuranosidase 4, vacuolar; Possible role in the continued mobilization of sucrose to sink organs. Regulates root elongation.
AT1G13260	-3.94942	-4.99843	UC	RAV1	AP2/ERF and B3 domain-containing transcription factor RAV1; Binds specifically to bipartite recognition sequences composed of two unrelated motifs, 5'-CAACA-3' and 5'-CACCTG-3'. May function as [...]
AT1G13410	UC	UC	2.39963	T6J4.15	Tetratricopeptide repeat (TPR)-like superfamily protein.
AT1G13470	-2.53125	-2.04981	UC	T6J4.20	Uncharacterized protein.
AT1G13520	UC	UC	4.96214	F13B4.3	At1g13520.
AT1G13825	UC	UC	1.91792	A0A1P8ASM2	Uncharacterized protein.
AT1G14350	-1.70118	-1.81861	UC	MYB124	Transcription factor MYB124; Transcription factor that binds to DNA in promoters cis- regulatory element 5'-GGCGCGC-3' of cell cycle genes, including cyclins, cyclin-dependent kinases (CDKs), an [...]
AT1G14880	-6.08424	-4.93976	-3.92801	PCR1	Protein PLANT CADMIUM RESISTANCE 1; Involved in glutathione-independent cadmium resistance. Reduces cadmium uptake rather than activating efflux, but is not closely coupled to calcium transporte [...]
AT1G14940	UC	UC	2.48845	MLP3	Polyketide cyclase/dehydrase and lipid transport superfamily protein.
AT1G15175	-3.39706	-2.69922	UC	- -	- -
AT1G15190	1.50211	2.25544	3.59075	FLA19	Fasciclin-like arabinogalactan protein 19; May be a cell surface adhesion protein; Belongs to the fasciclin-like AGP family.
AT1G15830	-5.01392	-4.92237	-2.87498	F7H2.23	Uncharacterized protein.
AT1G15840	UC	UC	4.32248	F7H2.17	Uncharacterized protein.
AT1G16260	-2.40066	-1.23111	UC	WAKL8	Wall-associated receptor kinase-like 8; Serine/threonine-protein kinase that may function as a signaling receptor of extracellular matrix component.
AT1G16630	-3.8221	-5.05854	UC	F19K19.8	Transmembrane protein.
AT1G16950	UC	UC	3.01383	CEP13	C-terminally encoded peptide 13; Extracellular signaling peptide that may regulate primary root growth rate and systemic nitrogen (N)-demand signaling.
AT1G17060	-0.881255	-1.78108	UC	CYP72C1	Cytochrome P450 72C1; Atypical cytochrome P450 involved in brassinosteroids (BRs) inactivation and regulation of BRs homeostasis. Does not possess carbon 26 hydroxylase activity and may inactiva [...]
AT1G17147	-2.66902	-1.33068	UC	VQ1	VQ motif-containing protein 1; May modulate WRKY transcription factor activities.
AT1G17700	-2.80665	-3.06909	UC	PRA1F1	PRA1 family protein F1; May be involved in both secretory and endocytic intracellular trafficking in the endosomal/prevacuolar compartments; Belongs to the PRA1 family.
AT1G18550	-1.9261	-2.82553	UC	KIN8A	Kinesin-like protein KIN-8A; Belongs to the TRAFAC class myosin-kinesin ATPase superfamily. Kinesin family. KIN-8 subfamily.
AT1G18650	-1.32277	-1.99113	UC	PDCB3	PLASMODESMATA CALLOSE-BINDING PROTEIN 3.
AT1G19510	-1.79933	-1.37624	UC	RL5	Protein RADIALIS-like 5; Probable transcription factor.
AT1G19840	-2.18006	-2.34635	UC	SAUR53	SAUR-like auxin-responsive protein family.
AT1G19960	-3.34236	-2.05608	UC	T20H2.25	Transcription factor.
AT1G19990	-1.3907	-1.75101	UC	T20H2.23	Nucleolin.
AT1G20180	UC	UC	2.16119	T20H2.5	UPF0496 protein At1g20180; Belongs to the UPF0496 family.
AT1G20610	-2.1818	-3.7905	UC	CYCB2-3	Cyclin-B2-3.
AT1G21100	-1.87892	-1.93368	UC	IGMT1	Indole glucosinolate O-methyltransferase 1; Involved in indole glucosinolate biosynthesis. Catalyzes methoxylation reactions of the glucosinolate indole ring. Converts the hydroxy intermediates [...]
AT1G23870	-1.76575	-1.74161	UC	TPS9	Probable alpha,alpha-trehalose-phosphate synthase [UDP-forming] 9; In the C-terminal section; belongs to the trehalose phosphatase family.
AT1G25510	-2.74113	-4.4663	UC	F2J7.6	Eukaryotic aspartyl protease family protein; Belongs to the peptidase A1 family.
AT1G26330	-2.72381	-2.93624	UC	F28B23.2	DNA binding protein.
AT1G26761	-1.52848	-1.7435	UC	Q93ZE3_ARATH	Arabinanase/levansucrase/invertase.
AT1G27045	-4.52946	-3.62245	UC	ATHB-54	Homeobox-leucine zipper protein ATHB-54; Probable transcription factor.
AT1G27110	UC	UC	1.70302	T7N9.17	Tetratricopeptide repeat (TPR)-like superfamily protein.
AT1G27140	UC	UC	1.91792	GSTU14	Glutathione S-transferase U14; May be involved in the conjugation of reduced glutathione to a wide number of exogenous and endogenous hydrophobic electrophiles and have a detoxification role aga [...]
AT1G27990	UC	UC	2.96353	F13K9.9	Transmembrane protein.
AT1G28470	UC	UC	1.90928	NAC010	NAC domain-containing protein 10; Transcriptional activator that plays a regulatory role in the development of secondary cell wall fibers. Is a direct target of SND1.
AT1G28650	UC	UC	4.7266	F1K23.13	GDSL esterase/lipase At1g28650.
AT1G29071	-1.64113	-1.47455	UC	- -	- -
AT1G29100	UC	UC	1.66948	HIPP29	Heavy metal-associated isoprenylated plant protein 29; Heavy-metal-binding protein.
AT1G29270	-3.06002	-1.74506	UC	F28N24.5	Transcription factor bHLH35-like protein.
AT1G29460	-1.62101	-1.55124	UC	SAUR65	Auxin-responsive protein SAUR65; May promote auxin-stimulated organ elongation, such as hypocotyls, stamen filaments and petals. Belongs to the ARG7 family.
AT1G29520	-1.8066	-1.76156	UC	F15D2.10	Plasma membrane associated protein, putative; 66162-66952.
AT1G29930	-1.20659	-1.94919	UC	LHCB1.3	Chlorophyll a-b binding protein 1, chloroplastic; The light-harvesting complex (LHC) functions as a light receptor, it captures and delivers excitation energy to photosystems with which it is cl [...]
AT1G30250	-1.78935	-2.13166	UC	F12P21.5	At1g30250.
AT1G30420	-1.39575	-1.72772	UC	ABCC11	ABC transporter C family member 11; Pump for glutathione S-conjugates; Belongs to the ABC transporter superfamily. ABCC family. Conjugate transporter (TC 3.A.1.208) subfamily.
AT1G30455	UC	UC	1.91792	F4I4V4_ARATH	Cyclin/Brf1-like TBP-binding domain-containing protein.
AT1G32190	-1.81509	-1.37315	UC	F3C3.3	Alpha/beta-Hydrolases superfamily protein.
AT1G32350	UC	3.90701	6.49107	AOX3	Ubiquinol oxidase 3, mitochondrial; Catalyzes the cyanide-resistant oxidation of ubiquinol and the reduction of molecular oxygen to water, but does not translocate protons and consequently is no [...]
AT1G32583	UC	UC	2.37096	TDL1	TPD1 protein homolog 1.
AT1G33800	UC	UC	2.06408	GXM3	Glucuronoxylan 4-O-methyltransferase 3; Methyltransferase catalyzing 4-O-methylation of glucuronic acid side chains on xylan; Belongs to the methyltransferase superfamily.
AT1G33811	-4.58995	-5.38737	-3.54527	F14M2.7	GDSL esterase/lipase At1g33811.
AT1G34760	-1.59124	-2.07863	UC	GRF11	14-3-3-like protein GF14 omicron; Is associated with a DNA binding complex that binds to the G box, a well-characterized cis-acting DNA regulatory element found in plant genes.
AT1G35180	-4.30351	-3.87155	-2.1992	T32G9.28	TRAM, LAG1 and CLN8 (TLC) lipid-sensing domain containing protein.
AT1G35830	-2.0488	-2.14013	UC	F10O5.2	VQ motif-containing protein.
AT1G36340	UC	UC	1.66948	UBC31	Probable ubiquitin-conjugating enzyme E2 31; Accepts the ubiquitin from the E1 complex and catalyzes its covalent attachment to other proteins; Belongs to the ubiquitin-conjugating enzyme family.
AT1G45010	-1.82254	-1.2723	UC	F27F5.9	TRAM, LAG1 and CLN8 (TLC) lipid-sensing domain containing protein.
AT1G45201	-1.76085	-2.04259	UC	TLL1	Triacylglycerol lipase-like 1.
AT1G47370	-2.51343	-1.64399	UC	RBA1	Disease resistance protein RBA1; Disease resistance (R) protein that specifically recognizes the HopBA1 type III effector protein from P.syringae, and triggers cell death. Acts as a NAD(+) hydro [...]
AT1G47840	-3.62072	-3.67646	UC	HXK3	Hexokinase-like 1 protein; Fructose and glucose phosphorylating enzyme. Belongs to the hexokinase family.
AT1G49210	-4.16779	-3.66098	-1.95442	ATL76	E3 ubiquitin-protein ligase ATL76; E3 ubiquitin-protein ligase able to catalyze polyubiquitination with ubiquitin-conjugating enzyme E2 UBC8 in vitro.
AT1G49800	UC	UC	1.91273	CEP16	C-terminally encoded peptide 16; Extracellular signaling peptide that may regulate primary root growth rate and systemic nitrogen (N)-demand signaling. Belongs to the C-terminally encoded plant [...]
AT1G49920	-3.05755	-2.5834	UC	T18C15.1	MuDR family transposase.
AT1G49938	UC	UC	1.66948	- -	- -
AT1G50732	-2.00753	-2.18198	UC	F4I6L1_ARATH	Transmembrane protein.
AT1G51520	UC	UC	2.33548	F5D21.15	RNA-binding (RRM/RBD/RNP motifs) family protein.
AT1G51780	-2.4932	-3.21672	UC	ILL5	IAA-amino acid hydrolase ILR1-like 5; Hydrolyzes certain amino acid conjugates of the plant growth regulator indole-3-acetic acid (IAA); Belongs to the peptidase M20 family.
AT1G51820	-2.71117	-3.61436	UC	F19C24.23	Probable LRR receptor-like serine/threonine-protein kinase At1g51820; Belongs to the protein kinase superfamily. Ser/Thr protein kinase family.
AT1G52190	-2.99959	-3.91634	UC	NPF1.2	Protein NRT1/ PTR FAMILY 1.2; Low-affinity nitrate transporter involved in xylem-to-phloem transfer for redistributing nitrate into developing leaves. Not involved in dipeptides transport.
AT1G52450	UC	UC	2.23763	F6D8.33	Ubiquitin carboxyl-terminal hydrolase-related protein.
AT1G52770	-2.5176	-1.72947	UC	F14G24.4	Putative non-phototropic hypocotyl; 25081-26618; Belongs to the NPH3 family.
AT1G53163	-2.49318	-2.45741	UC	Q9MAI8_ARATH	Membrane-associated kinase regulator.
AT1G53690	-3.82795	-3.42855	UC	NRPB12L	DNA-directed RNA polymerase subunit 12-like protein.
AT1G53730	-4.15525	-2.83139	UC	SRF6	Protein STRUBBELIG-RECEPTOR FAMILY 6; Belongs to the protein kinase superfamily. Ser/Thr protein kinase family.
AT1G53920	-3.58282	-3.04622	UC	GLIP5	GDSL esterase/lipase 5.
AT1G54110	UC	UC	1.53222	F15I1.20	Membrane fusion protein Use1.
AT1G54820	-3.23013	-3.17361	UC	T22H22.21	Protein kinase superfamily protein.
AT1G55010	-3.43363	-3.7241	UC	PDF1.5	Defensin-like protein 18; Confers broad-spectrum resistance to pathogens; Belongs to the DEFL family.
AT1G57980	-1.96404	-1.3574	UC	PUP23	Probable purine permease 23.
AT1G58290	-1.6963	-2.11508	UC	HEMA1	Glutamyl-tRNA reductase 1, chloroplastic; Catalyzes the NADPH-dependent reduction of glutamyl-tRNA(Glu) to glutamate 1-semialdehyde (GSA). Probably involved in the tetrapyrrole synthesis require [...]
AT1G59590	-2.22202	-1.41154	UC	ZCF37	ZCF37 protein.
AT1G59670	UC	UC	3.11135	GSTU15	Glutathione S-transferase U15; May be involved in the conjugation of reduced glutathione to a wide number of exogenous and endogenous hydrophobic electrophiles and have a detoxification role aga [...]
AT1G60390	-3.14755	-1.70715	UC	PGL2	Polygalacturonase 1 beta-like protein 2; Involved in cell size determination.
AT1G60986	UC	UC	1.66948	SCRL4	Defensin-like protein 245; Belongs to the DEFL family.
AT1G60987	UC	UC	3.67471	SCRL5	Defensin-like protein 246; Belongs to the DEFL family.
AT1G61810	UC	UC	3.4985	BGLU45	Beta-glucosidase 45; Hydrolyzes p-nitrophenyl beta-D-glucoside and natural glucosides such as syringin, coniferin and p-coumaryl alcohol glucoside. May be involved in lignification by hydrolyzin [...]
AT1G62333	UC	UC	1.55023	Q9MAV4_ARATH	F24O1.6.
AT1G62440	-4.21692	-5.06139	-2.94692	LRX2	Leucine-rich repeat extensin-like protein 2; Modulates cell morphogenesis by regulating cell wall formation and assembly, and/or growth polarization. Together with LRX2, component of the extrace [...]
AT1G63300	-2.02197	-1.18809	UC	F9N12.8	Myosin heavy chain-related protein.
AT1G63910	UC	UC	3.97375	AtMYB103	Putative MYB family transcription factor; 19087-20744.
AT1G65060	-1.85441	-1.384	UC	4CL3	4-coumarate--CoA ligase 3; Produces CoA thioesters of a variety of hydroxy- and methoxy- substituted cinnamic acids, which are used to synthesize several phenylpropanoid-derived compounds, inclu [...]
AT1G65330	-3.80245	-3.70978	UC	PHE1	MADS-box transcription factor PHERES 1; Probable transcription factor involved in the development of gametophytes and seeds.
AT1G65484	-3.11919	-2.90313	UC	B3H4Y2_ARATH	Transmembrane protein.
AT1G65486	-3.90389	-4.33272	-2.63344	A0A1P8AQ95	Transmembrane protein.
AT1G65790	-1.82079	-1.19292	UC	SD17	Receptor-like serine/threonine-protein kinase SD1-7; Involved in the regulation of cellular expansion and differentiation. Mediates subcellular relocalization of PUB9 from nucleus to plasma memb [...]
AT1G65845	-3.89201	-4.78123	UC	Q9SHX3_ARATH	Transmembrane protein.
AT1G66090	-2.67947	-2.7892	UC	F15E12.17	Disease resistance protein (TIR-NBS class).
AT1G66100	-9.15213	-9.75066	-6.55678	F15E12.20	Probable thionin-2.4; Thionins are small plant proteins which are toxic to animal cells. They seem to exert their toxic effect at the level of the cell membrane. Their precise function is not kn [...]
AT1G66190	-2.3976	-3.14792	UC	F15E12.13	Uncharacterized protein F15E12.13.
AT1G66920	-1.11146	-1.76192	UC	LRK10L-2.4	LEAF RUST 10 DISEASE-RESISTANCE LOCUS RECEPTOR-LIKE PROTEIN KINASE-like 2.4; Belongs to the protein kinase superfamily. Ser/Thr protein kinase family.
AT1G67180	-2.95565	-3.06122	UC	F5A8.9	Zinc finger (C3HC4-type RING finger) family protein / BRCT domain-containing protein.
AT1G67810	-1.90786	-2.09536	UC	SUFE2	SufE-like protein 2, chloroplastic; Participates in cysteine desulfurization mediated by NFS2. Can activate the cysteine desulfurase activity of NFS2 in vitro. Cysteine desulfurization mobilizes [...]
AT1G67910	-3.09218	-2.80268	-1.34427	T23K23.24	AT1G67910 protein.
AT1G68330	-3.65952	-4.80621	-2.09381	T22E19.4	Membrane-associated kinase regulator.
AT1G68560	-1.3929	-2.01164	UC	XYL1	Alpha-xylosidase 1; Glycoside hydrolase releasing xylosyl residues from xyloglucan oligosaccharides at the non-reducing end. Has alpha- xylosidase activity against xylan oligosaccharides. Also h [...]
AT1G69080	-1.49523	-2.70082	UC	F4N2.5	Adenine nucleotide alpha hydrolases-like superfamily protein.
AT1G69160	-2.00756	-2.22941	UC	F4N2.12	Protein BIG GRAIN 1-like E; Involved in auxin transport. Regulator of the auxin signaling pathway; Belongs to the BIG GRAIN 1 (BG1) plant protein family.
AT1G69523	-1.40308	-1.88897	UC	Q941B1_ARATH	S-adenosyl-L-methionine-dependent methyltransferases superfamily protein.
AT1G69900	-4.3365	-4.1861	-2.30606	T17F3.7	Actin cross-linking protein.
AT1G70390	UC	UC	2.19236	F17O7.7	Putative F-box protein At1g70390.
AT1G70710	-3.01095	-2.73689	UC	CEL1	Endoglucanase 8; Required for cellulose formation of the cell wall. Belongs to the glycosyl hydrolase 9 (cellulase E) family.
AT1G71880	-1.3586	-1.89852	UC	SUC1	Sucrose transport protein SUC1; Responsible for the transport of sucrose into the cell, with the concomitant uptake of protons (symport system). This transport is both voltage- and energy-depend [...]
AT1G72200	UC	UC	1.93104	ATL11	RING-H2 finger protein ATL11; Belongs to the RING-type zinc finger family. ATL subfamily.
AT1G72270	UC	UC	2.07606	T9N14.23	Nucleolar pre-ribosomal-associated protein.
AT1G72910	-2.01937	-1.56534	UC	F3N23.11	Toll-Interleukin-Resistance (TIR) domain-containing protein.
AT1G73020	-1.90117	-2.22801	UC	F3N23.22	Anoctamin-like protein At1g73020; May act as a calcium-activated chloride channel. Belongs to the anoctamin (TC 1.A.17) family.
AT1G73260	UC	UC	4.48497	KTI4	Kunitz trypsin inhibitor 4; Exhibits Kunitz trypsin protease inhibitor activity. Involved in modulating programmed cell death (PCD) in plant-pathogen interactions. Can inhibit both serine protea [...]
AT1G73805	-1.85851	-1.21612	UC	SARD1	Protein SAR DEFICIENT 1; Transcription activator that binds DNA in a sequence-specific manner, 5'-GAAATTTTGG-3', to promote the expression of target genes. Recruited to the promoter of ICS1 and [...]
AT1G74080	UC	UC	1.55211	MYB122	Transcription factor MYB122; Transcription factor involved in glucosinolates biosynthesis.
AT1G74670	-4.63407	-5.79174	UC	GASA6	Gibberellin-regulated protein 6; Gibberellin-regulated protein that may function in hormonal controlled steps of development such as seed germination, flowering and seed maturation.
AT1G74770	UC	UC	2.16119	F25A4.26	Zinc finger protein BRUTUS-like At1g74770; Probable E3 ubiquitin-protein ligase that may regulate the response to iron deficiency and thus contributes to iron homeostasis.
AT1G75030	-3.49601	-2.30202	UC	F9E10.12	Thaumatin-like protein; 28949-28112.
AT1G75450	-2.35339	-3.27584	UC	CKX5	Cytokinin dehydrogenase 5; Catalyzes the oxidation of cytokinins, a family of N(6)- substituted adenine derivatives that are plant hormones, where the substituent is an isopentenyl group.
AT1G75680	-1.50864	-2.01583	UC	GH9B7	Endoglucanase 10; Belongs to the glycosyl hydrolase 9 (cellulase E) family.
AT1G75820	-1.87218	-2.36293	UC	CLV1	Receptor protein kinase CLAVATA1; Involved in the detection of CLV3 and CLV3-like (CLE) peptides, that act as extracellular signals regulating meristem maintenance. Acts with CLV3p as a ligand-r [...]
AT1G77010	UC	UC	2.62187	PCMP-E5	Putative pentatricopeptide repeat-containing protein At1g77010, mitochondrial.
AT1G77530	UC	UC	1.91273	T5M16.12	Putative caffeic acid 3-O-methyltransferase; 46558-47944; Belongs to the class I-like SAM-binding methyltransferase superfamily. Cation-independent O-methyltransferase family.
AT1G78120	-2.89614	-3.33391	UC	TPR12	Tetratricopeptide repeat (TPR)-like superfamily protein.
AT1G78430	-3.97536	-3.75774	UC	ICR4	Interactor of constitutive active ROPs 4; Acts as a scaffold, mediating interaction of ROPs with different proteins; Belongs to the ICR family.
AT1G78440	-1.94288	-2.42709	UC	GA2OX1	Gibberellin 2-beta-dioxygenase 1; Catalyzes the 2-beta-hydroxylation of several biologically active gibberellins, leading to the homeostatic regulation of their endogenous level. Catabolism of g [...]
AT1G78460	-2.01273	-2.68602	UC	T30F21.20	SOUL heme-binding family protein.
AT1G78530	-3.22543	-3.2425	UC	T30F21.14	Receptor-like serine/threonine-protein kinase At1g78530.
AT1G78970	-2.44583	-2.588	UC	LUP1	Lupeol synthase 1; Multifunctional enzyme that converts oxidosqualene to lupeol and 3,20-dihydroxylupane. Minor production of beta-amyrin, germanicol, taraxasterol and psi-taraxasterol.
AT1G79770	-3.74298	-3.86922	UC	F19K16.25	CASP-like protein (DUF1677).
AT1G80760	-1.50937	-2.52376	UC	NIP6-1	Aquaporin NIP6-1; Transports glycerol, urea and formamide, in Xenopus laevis oocytes. Very low water transport activity. Belongs to the MIP/aquaporin (TC 1.A.8) family. NIP (TC 1.A.8.12) subfami [...]
AT1G80920	-1.47136	-1.75958	UC	ATJ8	Chaperone protein dnaJ 8, chloroplastic; Plays a continuous role in plant development probably in the structural organization of compartments; Belongs to the DnaJ family. C/III subfamily.
AT2G01390	UC	UC	2.70473	EMB3111	Pentatricopeptide repeat-containing protein At2g01390; Belongs to the PPR family. P subfamily.
AT2G01610	-2.01224	-2.12636	UC	T8O11.22	Plant invertase/pectin methylesterase inhibitor superfamily protein.
AT2G01950	-1.95361	-2.69551	UC	BRL2	Serine/threonine-protein kinase BRI1-like 2; Receptor with a serine/threonine-protein kinase activity, which may transduce extracellular spatial and temporal signals into downstream cell differe [...]
AT2G02380	UC	UC	2.57256	GSTZ2	Glutathione S-transferase Z2; May be involved in the conjugation of reduced glutathione to a wide number of exogenous and endogenous hydrophobic electrophiles and have a detoxification role agai [...]
AT2G02540	UC	UC	1.58608	ZHD3	Zinc-finger homeodomain protein 3; Putative transcription factor.
AT2G03200	UC	UC	2.24308	T18E12.13	Putative chloroplast nucleoid DNA binding protein; Belongs to the peptidase A1 family.
AT2G03360	UC	UC	3.10009	AT2G03360	Glycosyltransferase family 61 protein.
AT2G05070	-2.09861	-3.27856	UC	LHCB2.2	Chlorophyll a-b binding protein 2.2, chloroplastic; The light-harvesting complex (LHC) functions as a light receptor, it captures and delivers excitation energy to photosystems with which it is [...]
AT2G05100	-1.81527	-2.93309	UC	LHCB2.1	Chlorophyll a-b binding protein 2.1, chloroplastic; The light-harvesting complex (LHC) functions as a light receptor, it captures and delivers excitation energy to photosystems with which it is [...]
AT2G07643	UC	UC	1.53844	A0A1P8B017	Uncharacterized protein.
AT2G07690	-1.96075	-1.77363	UC	MCM5	DNA replication licensing factor MCM5; Probable component of the MCM2-7 complex (MCM complex) that may function as a DNA helicase and which is essential to undergo a single round of replication [...]
AT2G07702	UC	UC	2.64603	M440_ARATH	Uncharacterized mitochondrial protein AtMg00440/AtMg01140.
AT2G07714	UC	UC	2.73459	T18C6.25	Transcription factor-like protein.
AT2G07748	UC	UC	1.91273	- -	- -
AT2G08630	UC	UC	1.66948	- -	- -
AT2G08945	-1.99718	-2.82803	UC	- -	- -
AT2G09150	UC	UC	2.29914	- -	- -
AT2G14560	-5.85254	-3.78276	UC	LURP1	Protein LURP1; Involved in basal defense against virulent oomycetes. Might be related to the phospholipid scramblase and tubby-like superfamily of membrane tethered transcription factors (By sim [...]
AT2G15020	UC	UC	1.80455	T15J14.6	At2g15020.
AT2G15080	-1.46825	-1.66526	UC	RLP19	Receptor-like protein 19.
AT2G16440	-2.2365	-2.41882	UC	MCM4	DNA replication licensing factor MCM4; Probable component of the MCM2-7 complex (MCM complex) that may function as a DNA helicase and which is essential to undergo a single round of replication [...]
AT2G16850	-3.71056	-4.71493	-2.73059	PIP2-8	Probable aquaporin PIP2-8; Aquaporins facilitate the transport of water and small neutral solutes across cell membranes.
AT2G18300	-4.40947	-5.51729	UC	HBI1	Transcription factor HBI1; Atypical bHLH transcription factor that acts as positive regulator of cell elongation downstream of multiple external and endogenous signals by direct binding to the p [...]
AT2G18650	-2.00664	-4.15696	UC	ATL49	Putative RING-H2 finger protein ATL49; May be involved in female gametophyte development.
AT2G18730	-1.75664	-2.40327	UC	DGK3	Diacylglycerol kinase 3; Phosphorylates the second messenger diacylglycerol (DAG) to generate phosphatidic acid (PA), another important signaling molecule. PA is required for plant development a [...]
AT2G19330	UC	UC	1.68308	PIRL6	Plant intracellular Ras-group-related LRR protein 6; Leucine-rich repeat protein that likely mediates protein interactions, possibly in the context of signal transduction. Belongs to the SHOC2 f [...]
AT2G20515	-1.85731	-3.62555	UC	Q8S8D0_ARATH	Pollen Ole e I family allergen protein.
AT2G20750	-2.72277	-1.83304	UC	EXPB1	Expansin-B1; May cause loosening and extension of plant cell walls by disrupting non-covalent bonding between cellulose microfibrils and matrix glucans. No enzymatic activity has been found (By [...]
AT2G21100	UC	UC	2.15804	DIR23	Dirigent protein 23; Dirigent proteins impart stereoselectivity on the phenoxy radical-coupling reaction, yielding optically active lignans from two molecules of coniferyl alcohol in the biosynt [...]
AT2G21540	-2.12273	-2.96959	UC	SFH3	Phosphatidylinositol/phosphatidylcholine transfer protein SFH3; Required for transport of secretory proteins from the Golgi complex (By similarity). Catalyzes the transfer of phosphatidylinosito [...]
AT2G22330	-1.66077	-2.66436	UC	CYP79B3	Tryptophan N-monooxygenase 2; Converts tryptophan to indole-3-acetaldoxime, a precursor for tryptophan derived glucosinolates and indole-3-acetic acid (IAA). Belongs to the cytochrome P450 famil [...]
AT2G22980	-1.06406	-1.90548	UC	SCPL13	Serine carboxypeptidase-like 13; Catalyzes the formation of 1,2-bis-O-sinapoyl beta-D- glucoside.
AT2G23660	UC	UC	1.91273	LBD10	LOB domain-containing protein 10; Belongs to the LOB domain-containing protein family.
AT2G24430	UC	UC	2.33179	NAC038	NAM (No apical meristem)-like protein.
AT2G24870	UC	UC	1.92508	F27C12.21	Plant self-incompatibility protein S1 family.
AT2G25080	-1.1043	-1.82687	UC	GPX1	Phospholipid hydroperoxide glutathione peroxidase 1, chloroplastic; Protects cells and enzymes from oxidative damage, by catalyzing the reduction of hydrogen peroxide, lipid peroxides and organi [...]
AT2G25200	-1.89823	-2.3122	UC	F13D4.4	At2g25200.
AT2G25297	-2.25582	-2.42171	UC	A0A178VQE8	Transmembrane protein.
AT2G25680	UC	UC	1.86765	MOT1	Molybdate transporter 1; High affinity molybdate transporter. Unable to transport sulfate; Belongs to the SLC26A/SulP transporter (TC 2.A.53) family.
AT2G25735	-4.67604	-3.99566	-2.59223	Q8RUI1_ARATH	Expressed protein.
AT2G25880	-3.43852	-3.97893	-1.92896	AUR2	Serine/threonine-protein kinase Aurora-2; Phosphorylates specifically 'Ser-10' of histone H3 in vitro. Associates with cytoskeletal structures that are necessary for cytokinesis and with the mic [...]
AT2G26180	-2.4765	-2.9358	UC	IQD6	Putative SF16 protein (Helianthus annuus).
AT2G26560	-4.32844	-4.59001	UC	PLP2	Patatin-like protein 2; Possesses non-specific lipolytic acyl hydrolase (LAH) activity. Catalyzes the hydrolysis of the galactolipids monogalactosyldiacylglycerol (MGDG) and digalactosyldiacylgl [...]
AT2G28410	-2.32537	-2.01997	UC	T1B3.7	Transmembrane protein.
AT2G28660	-1.59875	-1.51229	UC	T8O18.5	Putative chloroplast-targeted copper chaperone.
AT2G28680	UC	UC	2.60035	T8O18.3	RmlC-like cupins superfamily protein.
AT2G29130	UC	UC	2.74628	LAC2	Laccase-2; Lignin degradation and detoxification of lignin-derived products (By similarity). Required for root elongation in dehydration conditions; Belongs to the multicopper oxidase family.
AT2G29290	-2.53345	-2.29182	UC	F16P2.33	Tropinone reductase homolog At2g29290.
AT2G29370	UC	UC	1.91296	F16P2.25	Tropinone reductase homolog At2g29370; Belongs to the short-chain dehydrogenases/reductases (SDR) family. SDR65C subfamily.
AT2G29890	-3.0798	-2.85766	UC	VLN1	Villin-1; Binds actin and actin filament bundles in a Ca(2+)/calmodulin-insensitive manner, but is unable to sever, cap, and nucleate actin filament formation in vitro. Does not protect individu [...]
AT2G30424	-2.95378	-3.64041	UC	TCL2	MYB-like transcription factor TCL2; MYB-type transcription factor involved in trichome cell specification. Acts as a negative regulator of trichome patterning and formation. May function by supp [...]
AT2G31110	-1.13817	-2.30688	UC	TBL40	Protein trichome birefringence-like 40; May act as a bridging protein that binds pectin and other cell wall polysaccharides. Probably involved in maintaining esterification of pectins (By simila [...]
AT2G31880	-2.44419	-1.97833	UC	SOBIR1	Leucine-rich repeat receptor-like serine/threonine/tyrosine-protein kinase SOBIR1; Dual specificity kinase acting on both serine/threonine- and tyrosine-containing substrates. Acting as a counte [...]
AT2G31930	UC	UC	3.77446	F20M17.3	Uncharacterized protein.
AT2G31945	UC	UC	3.53005	Q8RU85_ARATH	Transmembrane protein.
AT2G32100	-3.55962	-4.50686	-2.53381	OFP16	Transcription repressor OFP16; Transcriptional repressor that regulates multiple aspects of plant growth and development through the regulation of BEL1-LIKE (BLH) and KNOX TALE (KNAT) homeodomai [...]
AT2G32880	-1.29111	-1.83632	UC	T21L14.18	TRAF-like family protein.
AT2G34010	-2.74526	-3.19178	UC	SPEAR2	Protein SPEAR2; Adapter-like transcriptional repressor recruiting TPL/TPR corepressors to inhibit TCP transcription factors (By similarity). May be involved in leaf development.
AT2G34080	UC	UC	2.42829	T14G11.20	Cysteine proteinases superfamily protein; Belongs to the peptidase C1 family.
AT2G34790	UC	UC	1.88857	MEE23	Berberine bridge enzyme-like 15; Required for endosperm development and polar nuclei fusion. Mediates oxidation of cinnamyl alcohol and of p- hydroxylated derivatives of cinnamyl alcohol (i.e. t [...]
AT2G35343	2.70977	3.66695	5.03164	- -	- -
AT2G36050	-5.48094	-6.22564	-4.25499	OFP15	Transcription repressor OFP15; Transcriptional repressor that regulates multiple aspects of plant growth and development through the regulation of BEL1-LIKE (BLH) and KNOX TALE (KNAT) homeodomai [...]
AT2G37925	-3.07662	-2.66657	UC	COPT4	Copper transporter 4; Involved in the transport of copper; Belongs to the copper transporter (Ctr) (TC 1.A.56) family. SLC31A subfamily.
AT2G37950	-4.67051	-5.62421	-3.46175	T8P21.14	RING/FYVE/PHD zinc finger superfamily protein.
AT2G39320	UC	UC	1.91792	OTU8	Putative OVARIAN TUMOR DOMAIN-containing deubiquitinating enzyme 8; Hydrolase that can remove conjugated ubiquitin from proteins in vitro and may therefore play an important regulatory role at t [...]
AT2G39375	UC	UC	2.68716	A0A1P8AXR6	Uncharacterized protein.
AT2G39700	-2.09722	-2.2646	UC	EXPA4	Expansin-A4; Causes loosening and extension of plant cell walls by disrupting non-covalent bonding between cellulose microfibrils and matrix glucans. No enzymatic activity has been found (By sim [...]
AT2G40370	UC	UC	2.91666	LAC5	Laccase-5; Lignin degradation and detoxification of lignin-derived products.
AT2G40530	-1.98524	-1.46582	UC	CEP15	C-terminally encoded peptide 15; Extracellular signaling peptide that may regulate primary root growth rate and systemic nitrogen (N)-demand signaling.
AT2G40610	-6.71844	-7.62581	-4.86815	EXPA8	Expansin-A8; Causes loosening and extension of plant cell walls by disrupting non-covalent bonding between cellulose microfibrils and matrix glucans. No enzymatic activity has been found (By sim [...]
AT2G40750	-3.88917	-4.52317	UC	WRKY54	Probable WRKY transcription factor 54; Transcription factor. Interacts specifically with the W box (5'-(T)TGAC[CT]-3'), a frequently occurring elicitor-responsive cis- acting element (By similar [...]
AT2G41280	UC	UC	2.32471	M10	Late embryogenesis abundant protein M10; May be involved in the acquisition of desiccation tolerance during late phase of embryogenesis.
AT2G41810	UC	UC	1.85313	T11A7.9	Uncharacterized protein At2g41810.
AT2G42170	-2.08901	-2.07429	UC	T24P15.8	Actin family protein; Belongs to the actin family.
AT2G42260	-4.45576	-3.79485	-2.59436	PYM	Protein POLYCHOME; Negative regulator of the anaphase-promoting complex/cyclosome (APC/C) ubiquitin ligase required for proper mitotic progression and cell fate determination; inhibits premature [...]
AT2G42800	-3.92738	-4.1903	UC	RLP29	Receptor like protein 29.
AT2G43139	UC	UC	1.91792	- -	- -
AT2G43690	UC	UC	1.66761	LECRK53	Probable L-type lectin-domain containing receptor kinase V.3; In the N-terminal section; belongs to the leguminous lectin family.
AT2G44580	-2.83681	-2.41004	UC	F16B22.7	Zinc ion binding protein.
AT2G45040	UC	UC	2.98617	4MMP	Metalloendoproteinase 4-MMP; Matrix metalloproteinases (MMPs) or matrixins may play a role in the degradation and remodeling of the extracellular matrix (ECM) during development or in response t [...]
AT2G45190	-1.01704	-1.81008	UC	YAB1	Axial regulator YABBY 1; Involved in the abaxial cell fate determination during embryogenesis and organogenesis. Regulates the initiation of embryonic shoot apical meristem (SAM) development (Re [...]
AT2G46710	-1.4737	-1.7025	UC	ROPGAP3	Rho GTPase-activating protein 3; Acts as a GTPase activator for the Rac-type GTPase by converting it to an inactive GDP-bound state. Involved in secondary wall pattern formation. In association [...]
AT2G46720	-2.21146	-2.36175	UC	HIC	3-ketoacyl-CoA synthase 13; Contributes to cuticular wax and suberin biosynthesis (By similarity). Regulates negatively the stomatal development in elevated CO(2) conditions; Belongs to the thio [...]
AT2G46780	-3.32948	-3.62939	UC	F19D11.6	RNA-binding (RRM/RBD/RNP motifs) family protein.
AT2G47160	-1.42422	-2.52149	UC	BOR1	Boron transporter 1; Efflux-type boron transporter for xylem loading, responsive of boron translocation from roots to shoots under boron limitation. Under boron excess, BOR1 is transferred from [...]
AT2G48130	UC	UC	1.80266	AtXYP7	Bifunctional inhibitor/lipid-transfer protein/seed storage 2S albumin superfamily protein; Belongs to the plant LTP family.
AT3G01070	-1.91112	-2.92639	UC	AtENODL16	Lamin-like predicted GPI-anchored protein.
AT3G01080	-1.57929	-1.88543	UC	WRKY58	Probable WRKY transcription factor 58; Transcription factor. Interacts specifically with the W box (5'-(T)TGAC[CT]-3'), a frequently occurring elicitor-responsive cis- acting element (By similar [...]
AT3G01140	-2.99214	-1.89652	UC	MYB106	Transcription factor MYB106; Functions as a repressor of epidermal cell outgrowth and negatively regulate trichome branch formation. Acts as both a positive and negative regulator of cellular ou [...]
AT3G01440	-1.88746	-2.01827	UC	PNSL3	Photosynthetic NDH subunit of lumenal location 3, chloroplastic; NDH shuttles electrons from NAD(P)H:plastoquinone, via FMN and iron-sulfur (Fe-S) centers, to quinones in the photosynthetic chai [...]
AT3G02920	-1.19481	-2.05258	UC	RPA2B	Replication protein A 32 kDa subunit B; Component of the replication protein A complex (RPA) required for DNA recombination, repair and replication. The activity of RPA is mediated by single-str [...]
AT3G03535	UC	2.18433	3.37687	- -	- -
AT3G03850	-3.88789	-3.15095	UC	SAUR26	SAUR-like auxin-responsive protein family.
AT3G03915	UC	UC	1.66948	- -	- -
AT3G05105	UC	UC	1.91792	- -	- -
AT3G05260	UC	UC	2.84597	T12H1.23	Glucose and ribitol dehydrogenase homolog 2; May act as a short alcohol-polyol-sugar dehydrogenase possibly related to carbohydrate metabolism and the acquisition of desiccation tolerance. May a [...]
AT3G05330	-1.97846	-2.32831	UC	TAN	Probable microtubule-binding protein TANGLED; Is required for spatial control cell division during plant development. Through an association with microtubules, acts both for the positioning of c [...]
AT3G05400	UC	UC	1.95088	SUGTL5	Sugar transporter ERD6-like 12; Sugar transporter.
AT3G05900	-1.54811	-3.1147	UC	F2O10.14	Neurofilament protein-like protein.
AT3G05905	UC	UC	2.782	- -	- -
AT3G05932	UC	1.35231	3.79829	- -	- -
AT3G06045	UC	UC	2.31921	- -	- -
AT3G06070	-5.43027	-6.12745	-4.10813	F24F17.5	At3g06070.
AT3G06100	-4.58934	-3.92699	UC	NIP7-1	Probable aquaporin NIP7-1; Aquaporins facilitate the transport of water and small neutral solutes across cell membranes; Belongs to the MIP/aquaporin (TC 1.A.8) family. NIP (TC 1.A.8.12) subfami [...]
AT3G06145	-5.01072	-4.89338	-3.2934	- -	- -
AT3G06840	-3.17085	-3.30104	UC	Q8LFJ2_ARATH	Uncharacterized protein.
AT3G07340	-4.35972	-2.83217	-1.78689	BHLH62	Transcription factor bHLH62.
AT3G07675	UC	UC	1.64827	- -	- -
AT3G08870	UC	1.01285	2.0652	LECRK61	Probable L-type lectin-domain containing receptor kinase VI.1; In the N-terminal section; belongs to the leguminous lectin family.
AT3G08940	-1.15403	-2.04861	UC	LHCB4.2	Chlorophyll a-b binding protein CP29.2, chloroplastic; The light-harvesting complex (LHC) functions as a light receptor, it captures and delivers excitation energy to photosystems with which it [...]
AT3G09185	UC	UC	2.56659	- -	- -
AT3G09730	-2.74606	-1.62644	UC	F4J1A6_ARATH	POLAR LOCALIZATION DURING ASYMMETRIC DIVISION AND protein.
AT3G09780	-3.17923	-3.03989	UC	CCR1	Serine/threonine-protein kinase-like protein CCR1; Serine/threonine-protein kinase with low activity; Belongs to the protein kinase superfamily. Ser/Thr protein kinase family.
AT3G10080	-3.75915	-4.43259	-2.5988	T22K18.9	Germin-like protein subfamily 3 member 2; May play a role in plant defense. Probably has no oxalate oxidase activity even if the active site is conserved.
AT3G10230	-1.62166	-1.48101	UC	LCY1	Lycopene beta cyclase, chloroplastic; Involved in carotenoid biosynthesis. Catalyzes the double cyclization reaction which converts lycopene to beta-carotene and neurosporene to beta-zeacarotene [...]
AT3G11020	UC	UC	2.62789	DREB2B	Dehydration-responsive element-binding protein 2B; Transcriptional activator that binds specifically to the DNA sequence 5'-[AG]CCGAC-3'. Binding to the C-repeat/DRE element mediates high salini [...]
AT3G11110	-4.50133	-5.23981	-3.27461	ATL66	RING-H2 finger protein ATL66; Belongs to the RING-type zinc finger family. ATL subfamily.
AT3G12520	UC	UC	1.57233	SULTR4;2	Probable sulfate transporter 4.2; H(+)/sulfate cotransporter that may play a role in the regulation of sulfate assimilation.
AT3G12710	-2.57464	-1.55475	UC	Q9LTW3_ARATH	DNA-3-methyladenine glycosidase I-like protein.
AT3G12775	UC	UC	1.66948	F4JAZ0_ARATH	Ubiquitin-conjugating enzyme family protein.
AT3G13510	-1.5867	-1.81168	UC	Q9LJE0_ARATH	Carboxyl-terminal peptidase, putative (DUF239).
AT3G13880	UC	UC	2.03408	PCMP-E89	Pentatricopeptide repeat-containing protein At3g13880; Belongs to the PPR family. PCMP-E subfamily.
AT3G13960	-2.41035	-1.72104	UC	GRF5-2	Growth-regulating factor 5; Transcription activator that plays a role in the regulation of cell expansion in leaf and cotyledons tissues. Acts together with GIF1 for the development of appropria [...]
AT3G14580	UC	UC	3.18243	MIE1.8	Pentatricopeptide repeat-containing protein At3g14580, mitochondrial.
AT3G15240	UC	UC	2.87004	F4IXI5_ARATH	Serine/threonine-protein kinase WNK (With No Lysine)-like protein.
AT3G15720	-3.05877	-2.02614	UC	MSJ11.12	Probable polygalacturonase At3g15720.
AT3G15990	UC	UC	1.87903	SULTR3;4	Probable sulfate transporter 3.4; H(+)/sulfate cotransporter that may play a role in the regulation of sulfate assimilation; Belongs to the SLC26A/SulP transporter (TC 2.A.53) family.
AT3G16920	UC	UC	2.1074	CTL2	Chitinase-like protein 2; No chitinase activity (By similarity). Required for proper cell wall biosynthesis in etiolated seedlings. Prevents lignin accumulation in hypocotyls; Belongs to the gly [...]
AT3G18080	-1.63385	-2.20899	UC	BGLU44	Beta-glucosidase 44; Hydrolyzes p-nitrophenyl beta-D-glucoside, p-nitrophenyl beta-D-mannoside, cellobiose, 4-methylumbelliferyl-beta-D-glucoside, laminarin, amygdalin, esculin and gentiobiose. [...]
AT3G18660	UC	UC	1.77009	GUX1	UDP-glucuronate:xylan alpha-glucuronosyltransferase 1; Glycosyltransferase required for the addition of both glucuronic acid and 4-O-methylglucuronic acid branches to xylan in stem cell walls. I [...]
AT3G19002	UC	UC	2.32042	- -	- -
AT3G19550	-2.24598	-2.58548	UC	Q8LEN7_ARATH	Glutamate racemase.
AT3G19850	-1.51856	-2.79104	UC	MPN9.9	BTB/POZ domain-containing protein At3g19850; May act as a substrate-specific adapter of an E3 ubiquitin- protein ligase complex (CUL3-RBX1-BTB) which mediates the ubiquitination and subsequent p [...]
AT3G20150	-2.61281	-1.78981	UC	KIN12F	Kinesin-like protein KIN-12F; Belongs to the TRAFAC class myosin-kinesin ATPase superfamily. Kinesin family. KIN-12 subfamily.
AT3G20350	-1.50345	-2.66809	UC	B7ZWR9_ARATH	Actin cytoskeleton-regulatory complex pan-like protein.
AT3G20395	-2.93759	-3.40463	UC	Q1G3M1_ARATH	RING/U-box superfamily protein.
AT3G20470	-2.36901	-2.73965	UC	GRP5	Glycine-rich protein 5; Involved in organ growth by promoting cell elongation processes.
AT3G21080	-2.90202	-2.17657	UC	Q9LJC4_ARATH	ABC transporter-like protein.
AT3G21500	UC	UC	2.20411	DXPS1	1-deoxy-D-xylulose 5-phosphate synthase 1.
AT3G21600	UC	UC	2.01167	Q9LVE6_ARATH	Senescence/dehydration-associated protein-like protein.
AT3G22231	-5.51586	-4.54195	-3.27672	PCC1	Cysteine-rich and transmembrane domain-containing protein PCC1; Modulates resistance against pathogens including oomycetes (e.g. Hyaloperonospora parasitica and Phytophthora brassicae) and fungi [...]
AT3G22540	-3.03806	-4.20406	UC	Q9LJ92_ARATH	At3g22540.
AT3G23450	-1.96417	-2.32378	UC	Q9LW52_ARATH	Transmembrane protein.
AT3G23930	UC	UC	2.63388	Q9LIR5_ARATH	Troponin T, skeletal protein.
AT3G24000	UC	UC	2.41237	PCMP-H87	Pentatricopeptide repeat-containing protein At3g24000, mitochondrial.
AT3G24420	-2.68791	-2.48596	UC	Q9LK01_ARATH	Alpha/beta-Hydrolases superfamily protein.
AT3G25020	-1.93089	-1.70567	UC	RLP42	Receptor-like protein 42; Recognizes fungal (e.g. B.cinerea and A.niger) endopolygalacturonases (PGs, e.g. BcPG3, BcPG2, BcPG4, BcPG6 and AnPGB) and acts as a microbe-associated molecular patter [...]
AT3G25290	UC	UC	1.55758	MJL12_25	Cytochrome b561 and DOMON domain-containing protein At3g25290; May act as a catecholamine-responsive trans-membrane electron transporter.
AT3G25930	UC	UC	3.46534	Q9LU98_ARATH	Adenine nucleotide alpha hydrolases-like superfamily protein.
AT3G26500	-2.04427	-2.00549	UC	PIRL2	Plant intracellular Ras-group-related LRR protein 2; Leucine-rich repeat protein that likely mediates protein interactions, possibly in the context of signal transduction. Belongs to the SHOC2 f [...]
AT3G27050	-1.44733	-1.57672	UC	Q94JV2_ARATH	AT3g27050/MOJ10_14.
AT3G27690	-4.46581	-5.75034	UC	LHCB2.4	Chlorophyll a-b binding protein 2.4, chloroplastic; The light-harvesting complex (LHC) functions as a light receptor, it captures and delivers excitation energy to photosystems with which it is [...]
AT3G27785	UC	UC	1.91792	MYB118	Transcription factor MYB118; Transcription activator that recognizes the motif 5'-TAACGG- 3' in the promoter of endosperm-induced genes. Promotes vegetative-to-embryonic transition and the forma [...]
AT3G28040	-2.06482	-2.64258	UC	MMG15.21	Probably inactive leucine-rich repeat receptor-like protein kinase At3g28040.
AT3G28860	-2.09855	-2.63826	UC	ABCB19	ABC transporter B family member 19; Auxin efflux transporter that acts as a negative regulator of light signaling to promote hypocotyl elongation. Mediates the accumulation of chlorophyll and an [...]
AT3G28917	UC	UC	3.0309	MIF2	Mini zinc finger protein 2; Inhibits zinc finger homeodomain (ZHD) transcription factors by interacting with them to prevent both their nuclear localization and their DNA-binding properties. Inv [...]
AT3G29670	-2.33196	-2.27566	UC	PMAT2	Phenolic glucoside malonyltransferase 2; Malonyltransferase acting on xenobiotic glucosides. Has activity toward 2-Naphthol glucoside (2NAG), 1-Naphthol glucoside (1NAG), kaempferol 7-O-glucosid [...]
AT3G33528	UC	UC	2.32495	Q1G3P2_ARATH	Uncharacterized protein.
AT3G42800	-3.53504	-4.5723	UC	T21C14.20	Protein BIG GRAIN 1-like C; Involved in auxin transport. Regulator of the auxin signaling pathway; Belongs to the BIG GRAIN 1 (BG1) plant protein family.
AT3G43190	-1.66927	-2.85854	UC	SUS4	Sucrose synthase 4; Sucrose-cleaving enzyme that provides UDP-glucose and fructose for various metabolic pathways; Belongs to the glycosyltransferase 1 family. Plant sucrose synthase subfamily.
AT3G43850	-2.34711	-4.31492	UC	T28A8_140	Uncharacterized protein T28A8_140.
AT3G45730	-2.00631	-2.44237	UC	T6D9_60	Uncharacterized protein At3g45730/T6D9_60.
AT3G45860	-4.01715	-5.29542	UC	CRK4-2	Cysteine-rich receptor-like protein kinase 4; Belongs to the protein kinase superfamily. Ser/Thr protein kinase family. CRK subfamily.
AT3G46700	UC	UC	3.58735	UGT76E3	UDP-glycosyltransferase 76E3; Belongs to the UDP-glycosyltransferase family.
AT3G47340	-2.6629	-3.69643	UC	ASN1	Asparagine synthetase [glutamine-hydrolyzing] 1; Essential for nitrogen assimilation, distribution and remobilization within the plant via the phloem.
AT3G47380	-6.32933	-6.26949	-4.10394	PMEI11	Pectinesterase inhibitor 11; Pectin methylesterase (PME) inhibitor involved in the maintenance of cell wall integrity in response to necrotrophic pathogens. Modulates PME activity and pectin met [...]
AT3G47540	-2.36493	-1.93318	UC	F4JBK4_ARATH	Chitinase family protein.
AT3G48080	-3.38041	-1.94412	UC	EDS1B	Protein EDS1B; Acts as a second functional copy of EDS1. Can mediate HRT- mediated resistance to turnip crinkle virus.
AT3G48100	-1.62933	-1.40825	UC	ARR5	Two-component response regulator ARR5; Functions as response regulator involved in His-to-Asp phosphorelay signal transduction system. Phosphorylation of the Asp residue in the receiver domain a [...]
AT3G48510	UC	UC	3.21156	T8P19.20	AtIII18x5-like protein.
AT3G48580	UC	UC	2.35539	XTH11	Probable xyloglucan endotransglucosylase/hydrolase protein 11; May catalyze xyloglucan endohydrolysis (XEH) and/or endotransglycosylation (XET). Cleaves and religates xyloglucan polymers, an ess [...]
AT3G48970	-5.28802	-4.75606	UC	HIPP31	Heavy metal-associated isoprenylated plant protein 31; Heavy-metal-binding protein.
AT3G49340	UC	UC	2.45093	T1G12.4	Putative cysteine proteinase; 15366-14136; Belongs to the peptidase C1 family.
AT3G49960	-3.36928	-4.24128	UC	PER35	Peroxidase 35; Removal of H(2)O(2), oxidation of toxic reductants, biosynthesis and degradation of lignin, suberization, auxin catabolism, response to environmental stresses such as wounding, pa [...]
AT3G50010	-3.70806	-3.85486	UC	F3A4.90	Cysteine/Histidine-rich C1 domain family protein.
AT3G50220	UC	UC	1.70043	IRX15	Protein IRREGULAR XYLEM 15; Required for xylan biosynthesis, but not directly involved in catalyzing the addition of sugars to the growing polymer.
AT3G50270	-1.50763	-2.60348	UC	F11C1_110	Anthranilate N-hydroxycinnamoyl/benzoyltransferase-like protein.
AT3G50390	UC	UC	2.52319	A2RVN9_ARATH	Transducin/WD40 repeat-like superfamily protein.
AT3G50400	UC	1.99081	3.69549	F11C1.240	GDSL esterase/lipase At3g50400.
AT3G50665	UC	UC	2.07283	- -	- -
AT3G51325	UC	UC	2.82227	Q3E7K1_ARATH	RING/U-box superfamily protein.
AT3G51590	UC	UC	3.18836	LTP12	Non-specific lipid-transfer protein 12; Plant non-specific lipid-transfer proteins transfer phospholipids as well as galactolipids across membranes. May play a role in wax or cutin deposition in [...]
AT3G52290	-1.85615	-1.75694	UC	T25B15_60	IQ-domain 3.
AT3G52530	UC	UC	1.69362	F22O6_90	Protein kinase superfamily protein.
AT3G52790	UC	UC	2.17018	F3C22_190	Peptidoglycan-binding LysM domain-containing protein.
AT3G53010	-2.79589	-3.56102	UC	Q0WNN6_ARATH	Carbohydrate esterase, putative (DUF303).
AT3G53380	-1.42703	-1.92317	UC	LECRK81	L-type lectin-domain containing receptor kinase VIII.1; In the N-terminal section; belongs to the leguminous lectin family.
AT3G54260	-1.87752	-2.31932	UC	TBL36	Protein trichome birefringence-like 36; May act as a bridging protein that binds pectin and other cell wall polysaccharides. Probably involved in maintaining esterification of pectins (By simila [...]
AT3G55240	-1.41056	-1.93805	UC	T26I12.120	Uncharacterized protein T26I12.120.
AT3G55485	UC	UC	2.89874	- -	- -
AT3G55500	-1.70604	-2.42327	UC	EXPA16	Expansin-A16; Causes loosening and extension of plant cell walls by disrupting non-covalent bonding between cellulose microfibrils and matrix glucans. No enzymatic activity has been found (By si [...]
AT3G55900	UC	UC	2.6047	F27K19.80	F-box protein At3g55900.
AT3G58060	UC	UC	1.91792	MTPC3	Putative metal tolerance protein C3; Involved in sequestration of excess metal in the cytoplasm into vacuoles to maintain metal homeostasis; Belongs to the cation diffusion facilitator (CDF) tra [...]
AT3G59880	-2.4525	-2.50455	UC	Q5BPM7_ARATH	Expressed protein.
AT3G60550	-3.49132	-2.77006	UC	CYCU2-2	Cyclin-U2-2; Belongs to the cyclin family. Cyclin U/P subfamily.
AT3G60840	-2.73988	-4.44639	UC	MAP65-4	65-kDa microtubule-associated protein 4; Microtubule-associated protein involved in mitotic spindle formation; Belongs to the MAP65/ASE1 family.
AT3G60972	UC	UC	3.03485	- -	- -
AT3G61510	-4.10351	-2.62302	UC	ACS1	1-aminocyclopropane-1-carboxylate synthase-like protein 1; Belongs to the class-I pyridoxal-phosphate-dependent aminotransferase family.
AT3G61840	-3.13611	-3.36842	UC	F4JFH6_ARATH	Auxin response factor, putative (DUF688).
AT3G61920	-4.79161	-3.63345	UC	F21F14.90	UvrABC system protein C.
AT3G62380	UC	UC	2.82688	T12C14_80	F-box/associated interaction domain protein.
AT3G62640	UC	UC	3.45443	F26K9_70	DUF3511 domain protein (DUF3511).
AT3G62820	-1.69153	-1.64203	UC	F26K9_250	Plant invertase/pectin methylesterase inhibitor superfamily protein.
AT3G63088	-5.34089	-5.14095	UC	DVL14	ROTUNDIFOLIA like 14.
AT3G63093	UC	UC	3.40039	A0A1I9LTT2	Uncharacterized protein.
AT3G63110	-2.96685	-5.64333	UC	IPT3	Adenylate isopentenyltransferase 3, chloroplastic; Involved in cytokinin biosynthesis. Catalyzes the transfer of an isopentenyl group from dimethylallyl diphosphate (DMAPP) to ATP and ADP; Belon [...]
AT3G63200	-1.34376	-2.06907	UC	PLP9	Probable inactive patatin-like protein 9.
AT3G63510	-1.24317	-1.81988	UC	Q8H128_ARATH	FMN-linked oxidoreductases superfamily protein.
AT4G01430	UC	UC	1.99447	UMAMIT29	WAT1-related protein At4g01430; Belongs to the drug/metabolite transporter (DMT) superfamily. Plant drug/metabolite exporter (P-DME) (TC 2.A.7.4) family.
AT4G01540	UC	UC	1.6002	NAC68	NAC domain-containing protein 68; Transcription activator activated by proteolytic cleavage through regulated intramembrane proteolysis (RIP) mediated by calpain or its functional homolog. Regul [...]
AT4G01883	-1.78726	-1.6857	UC	Q1G3L2_ARATH	Polyketide cyclase / dehydrase and lipid transport protein.
AT4G01950	-1.71609	-1.21494	UC	GPAT3	Probable glycerol-3-phosphate acyltransferase 3; Esterifies acyl-group from acyl-ACP to the sn-1 position of glycerol-3-phosphate, an essential step in glycerolipid biosynthesis. Belongs to the [...]
AT4G02330	-6.85361	-5.11524	-3.26225	PME41	Probable pectinesterase/pectinesterase inhibitor 41; Acts in the modification of cell walls via demethylesterification of cell wall pectin; In the C-terminal section; belongs to the pectinestera [...]
AT4G02850	-4.08682	-3.18654	UC	T5J8.17	Phenazine biosynthesis PhzC/PhzF family protein.
AT4G03190	-1.28089	-1.95857	UC	GRH1	GRR1-like protein 1; Component of SCF(ASK-cullin-F-box) E3 ubiquitin ligase complexes, which may mediate the ubiquitination and subsequent proteasomal degradation of target proteins. Auxin recep [...]
AT4G03925	UC	UC	2.60727	- -	- -
AT4G04445	UC	UC	2.84946	- -	- -
AT4G04460	UC	UC	3.32395	APA3	Aspartic proteinase A3; Involved in the processing and degradation of storage proteins; Belongs to the peptidase A1 family.
AT4G04485	UC	UC	1.79845	- -	- -
AT4G04630	-1.4109	-1.62055	UC	F4H6.15	Uncharacterized protein.
AT4G05085	-5.42718	-4.96492	-3.21492	- -	- -
AT4G05180	-1.76988	-2.5802	UC	PSBQ2	Oxygen-evolving enhancer protein 3-2, chloroplastic; Required for photosystem II assembly/stability and photoautotrophic growth under low light conditions. Belongs to the psbQ family.
AT4G06695	UC	UC	2.60825	- -	- -
AT4G08300	-2.32782	-3.63766	UC	UMAMIT17	WAT1-related protein At4g08300.
AT4G08835	UC	UC	2.43752	- -	- -
AT4G09375	UC	UC	1.91792	- -	- -
AT4G09420	-2.00358	-3.70398	UC	T15G18.160	Disease resistance protein (TIR-NBS class).
AT4G10910	-3.38453	-2.25103	UC	F25I24.120	Uncharacterized protein At4g10910/F25I24_120.
AT4G11000	-3.2177	-2.90326	UC	T22B4.2	Ankyrin repeat family protein.
AT4G11210	-3.59155	-2.7462	UC	DIR14	Dirigent protein 14; Dirigent proteins impart stereoselectivity on the phenoxy radical-coupling reaction, yielding optically active lignans from two molecules of coniferyl alcohol in the biosynt [...]
AT4G11211	-1.53317	-1.8324	UC	Q3EA55_ARATH	At4g11211.
AT4G11470	-3.71295	-3.84497	UC	CRK31	Putative cysteine-rich receptor-like protein kinase 31.
AT4G11590	UC	1.9785	3.15239	T5C23.20	F-box protein At4g11590; Component of SCF(ASK-cullin-F-box) E3 ubiquitin ligase complexes, which may mediate the ubiquitination and subsequent proteasomal degradation of target proteins.
AT4G12830	-3.26815	-3.09544	UC	T20K18.180	Alpha/beta-Hydrolases superfamily protein.
AT4G13000	-2.50162	-1.3895	UC	F25G13.90	AGC (cAMP-dependent, cGMP-dependent and protein kinase C) kinase family protein.
AT4G13370	-3.04825	-2.7482	UC	T9E8.110	Serine/arginine repetitive matrix protein, putative (DUF936).
AT4G13690	-3.16573	-3.41546	UC	F18A5.80	RNA-binding protein.
AT4G13860	UC	UC	2.74109	F18A5.250	RNA-binding (RRM/RBD/RNP motifs) family protein.
AT4G14380	-2.76905	-2.53552	UC	dl3230w	Cotton fiber protein.
AT4G14540	-2.50128	-1.07096	UC	NFYB3	Nuclear transcription factor Y subunit B-3; Component of the NF-Y/HAP transcription factor complex. The NF-Y complex stimulates the transcription of various genes by recognizing and binding to a [...]
AT4G15670	-1.84119	-2.38482	UC	GRXS7	Monothiol glutaredoxin-S7; May only reduce GSH-thiol disulfides, but not protein disulfides; Belongs to the glutaredoxin family. CC-type subfamily.
AT4G15830	-3.29853	-2.9111	UC	Dl3955c	ARM repeat superfamily protein.
AT4G16160	3.24822	2.3202	4.19133	OEP162	Outer envelope pore protein 16-2, chloroplastic; Voltage-dependent high-conductance channel with a slight cation-selectivity; selective for amino acids but excludes triosephosphates or uncharged [...]
AT4G16880	-3.25407	-3.768	-1.38655	Dl4470c	Leucine-rich repeat (LRR) family protein.
AT4G16970	-4.98824	-2.31513	UC	Dl4515c	Protein kinase superfamily protein.
AT4G17460	-4.0695	-4.88825	-2.8793	HAT1	Homeobox-leucine zipper protein HAT1; Probable transcription factor.
AT4G17490	-4.07926	-4.16221	-2.38086	ERF6	Ethylene-responsive transcription factor 6; Probably acts as a transcriptional activator. Binds to the GCC-box pathogenesis-related promoter element. May be involved in the regulation of gene ex [...]
AT4G18250	-3.74186	-2.37747	UC	T9A21.100	Receptor Serine/Threonine kinase-like protein.
AT4G18253	-4.89531	-3.27993	UC	A0A1P8B6P8	Receptor Serine/Threonine kinase-like protein.
AT4G18540	-3.3968	-2.77645	UC	F28J12.200	Transmembrane protein.
AT4G18660	UC	UC	2.07606	DOGL1	Protein DOG1-like 1.
AT4G18840	UC	UC	2.49454	PCMP-E101	Pentatricopeptide repeat-containing protein At4g18840; Belongs to the PPR family. PCMP-E subfamily.
AT4G19380	-2.98899	-2.19028	UC	FAO4A	Long-chain-alcohol oxidase FAO4A; Long-chain fatty alcohol oxidase involved in the omega- oxidation pathway of lipid degradation.
AT4G19420	-1.22601	-1.86305	UC	PAE8	Pectin acetylesterase 8; Hydrolyzes acetyl esters in homogalacturonan regions of pectin. In type I primary cell wall, galacturonic acid residues of pectin can be acetylated at the O-2 and O-3 po [...]
AT4G19660	-2.13583	-1.63286	UC	NPR4	Regulatory protein NPR4; May act as a substrate-specific adapter of an E3 ubiquitin- protein ligase complex (CUL3-RBX1-BTB) which mediates the ubiquitination and subsequent proteasomal degradati [...]
AT4G19820	-4.02601	-4.31844	UC	T16H5.180	Glycosyl hydrolase family protein with chitinase insertion domain-containing protein; Belongs to the glycosyl hydrolase 18 family.
AT4G20430	-1.79516	-3.20672	UC	SBT2.2	Subtilisin-like protease SBT2.2; Belongs to the peptidase S8 family.
AT4G21065	UC	UC	1.99114	PCMP-H28	Pentatricopeptide repeat-containing protein At4g21065.
AT4G21350	UC	UC	2.33038	PUB8	U-box domain-containing protein 8; Functions as an E3 ubiquitin ligase (By similarity). Involved in the age-dependent pseudo-self-compatibility process.
AT4G22120	-1.33978	-1.79408	UC	CSC1	Calcium permeable stress-gated cation channel 1; Acts as an osmosensitive calcium-permeable cation channel. Specifically conducts cations including Ca(2+), K(+) and Na(+) in vitro. Inactivation [...]
AT4G22305	-2.50671	-1.77306	UC	SOBER1	Carboxylesterase SOBER1; Possesses carboxylesterase activity in vitro with a preference for short acyl chain substrates. Functions as a negative regulator of the hypersensitive response (HR) tri [...]
AT4G22475	-6.25963	-5.90262	-4.30122	A0A1P8B5W2	Transmembrane protein.
AT4G22513	-5.69022	-5.14323	-3.84308	A8MQX6_ARATH	Bifunctional inhibitor/lipid-transfer protein/seed storage 2S albumin superfamily protein.
AT4G22900	-2.71818	-2.70558	UC	F7H19.80	Transmembrane protein, putative (DUF1191).
AT4G22910	-1.7562	-2.22118	UC	FZR2	Protein FIZZY-RELATED 2; Activator protein that regulates the ubiquitin ligase activity and substrate specificity of the anaphase promoting complex/cyclosome (APC/C). Necessary and sufficient fo [...]
AT4G23060	-1.97629	-2.69314	UC	IQD22	Calmodulin binding protein IQD22.
AT4G23140	-1.70627	-2.80388	UC	CRK6	Cysteine-rich receptor-like protein kinase 6.
AT4G23190	-2.06357	-1.56082	UC	CRK11	Cysteine-rich receptor-like protein kinase 11.
AT4G23340	-2.62474	-2.40741	UC	F16G20.40	2-oxoglutarate (2OG) and Fe(II)-dependent oxygenase superfamily protein; Belongs to the iron/ascorbate-dependent oxidoreductase family.
AT4G23520	UC	UC	4.13585	RDL6	Probable cysteine protease RDL6; Probable thiol protease.
AT4G23882	-2.24781	-2.42437	UC	F4JPD5_ARATH	Heavy metal transport/detoxification superfamily protein.
AT4G24026	-1.79571	-1.1641	UC	Q0WQ09_ARATH	Uncharacterized protein.
AT4G24265	-4.2203	-4.21735	UC	A0A1P8B8R8	Homeobox protein.
AT4G24780	-2.27522	-3.42502	UC	F22K18.20	Probable pectate lyase 18; Belongs to the polysaccharide lyase 1 family.
AT4G25845	UC	UC	2.17807	Q2V3E8_ARATH	Oxysterol-binding 4B-like protein.
AT4G26530	-2.61673	-3.12041	UC	FBA5	Fructose-bisphosphate aldolase 5, cytosolic; Fructose-bisphosphate aldolase that plays a key role in glycolysis and gluconeogenesis.
AT4G26960	-2.18388	-3.72235	UC	F10M23.300	Uncharacterized protein.
AT4G27740	-1.68587	-2.09922	UC	T29A15.230	Protein yippee-like At4g27740; Belongs to the yippee family.
AT4G28110	UC	UC	2.16319	MYB41	Transcription factor MYB41; Transcription factor involved in salt stress response. Confers tolerance to salt stress. Involved in distinct cellular processes in response to osmotic stress, includ [...]
AT4G28395	UC	UC	3.17802	ATA7	Protein ARABIDOPSIS THALIANA ANTHER 7.
AT4G28703	UC	UC	2.77125	Q8LAH4_ARATH	RmlC-like cupins superfamily protein.
AT4G28780	-6.03502	-7.07498	-4.87604	F16A16.110	GDSL esterase/lipase At4g28780.
AT4G29080	-1.39697	-1.78257	UC	IAA27	Auxin-responsive protein IAA27; Aux/IAA proteins are short-lived transcriptional factors that function as repressors of early auxin response genes at low auxin concentrations. Repression is thou [...]
AT4G29270	-3.65332	-4.00275	UC	F17A13.90	HAD superfamily, subfamily IIIB acid phosphatase.
AT4G29340	UC	UC	2.90335	PRF4	Profilin-4; Binds to actin monomers and regulates the organization of the actin cytoskeleton. At high concentrations, profilin prevents the polymerization of actin, whereas it enhances it at low [...]
AT4G29740	-6.75944	-7.01503	-5.24748	CKX4	Cytokinin dehydrogenase 4; Catalyzes the oxidation of cytokinins, a family of N(6)- substituted adenine derivatives that are plant hormones, where the substituent is an isopentenyl group; Belong [...]
AT4G30230	-3.70806	-3.31686	UC	F9N11.80	Uncharacterized protein AT4g30230.
AT4G30610	-1.69018	-2.95391	UC	SCPL24	Serine carboxypeptidase 24 chain A; Active serine carboxypeptidase with broad substrate preference, including basic and hydrophilic groups. Processes a protein involved in an early event in the [...]
AT4G30680	-1.34058	-1.78794	UC	T10C21.30	Translation initiation factor-like protein.
AT4G31351	UC	UC	1.9258	B3H493_ARATH	Uncharacterized protein.
AT4G31500	-1.93642	-2.23579	UC	CYP83B1	Cytochrome P450 83B1; Involved in the metabolism of aromatic oximes. Catalyzes the oxime metabolizing step in indole glucosinolate biosynthesis by converting indole-3-acetaldoxime into indole-3- [...]
AT4G32810	UC	UC	3.12717	CCD8	Carotenoid cleavage dioxygenase 8, chloroplastic; Involved in strigolactones biosynthesis by cleaving the C(27) 9-cis-10'-apo-beta-carotenal produced by CCD7. Produces the C(19) carlactone and a [...]
AT4G33020	UC	UC	1.69239	ZIP9	Zinc transporter 9; Zinc transporter involved in zinc uptake in roots. Targeted by BZIP19 transcription factor in response to zinc-deficient conditions.
AT4G33666	-3.20112	-4.26466	UC	Q94AJ7_ARATH	Uncharacterized protein At4g33666.
AT4G35350	-2.05481	-1.88568	UC	XCP1	Cysteine protease XCP1; Cysteine protease involved in xylem tracheary element (TE) autolysis during xylogenesis in roots. Participates in micro autolysis within the intact central vacuole before [...]
AT4G35620	-3.98561	-3.94253	UC	CYCB2-2	Cyclin-B2-2; Belongs to the cyclin family. Cyclin AB subfamily.
AT4G35770	-2.55586	-3.69225	UC	STR15	Rhodanese-like domain-containing protein 15, chloroplastic.
AT4G35900	-2.72065	-1.76476	UC	FD	Protein FD; Transcription factor required for the transition to flowering promoted by FT; Belongs to the bZIP family.
AT4G36230	-2.92585	-2.7878	UC	F23E13.120	Putative glycine-rich cell wall protein.
AT4G36550	-1.62194	-1.92813	UC	PUB5	U-box domain-containing protein 5; Functions as an E3 ubiquitin ligase.
AT4G36570	-7.08283	-5.31117	-3.1273	RL3	Protein RADIALIS-like 3; Probable transcription factor.
AT4G37240	-7.48655	-8.35472	-5.51379	AP22.53	HTH-type transcriptional regulator.
AT4G37700	-4.19316	-3.97391	UC	F19F18.190	At4g37700.
AT4G38062	-4.0375	-3.50973	UC	F20D10.190	Uncharacterized protein At4g38062.
AT4G38530	UC	UC	2.42348	PLC3	Phosphoinositide phospholipase C 3; The production of the second messenger molecules diacylglycerol (DAG) and inositol 1,4,5-trisphosphate (IP3) is mediated by activated phosphatidylinositol-spe [...]
AT4G39770	-2.76722	-1.85249	UC	TPPH	Probable trehalose-phosphate phosphatase H; Removes the phosphate from trehalose 6-phosphate to produce free trehalose. Trehalose accumulation in plant may improve abiotic stress tolerance (By s [...]
AT4G39830	-2.59881	-1.51657	UC	T5J17.9	Cupredoxin superfamily protein; Belongs to the multicopper oxidase family.
AT4G39940	-1.77037	-1.98259	UC	APK2	Adenylyl-sulfate kinase 2, chloroplastic; Catalyzes the synthesis of activated sulfate. Essential for plant reproduction and viability. Required for the production of glucosinolates. Belongs to [...]
AT5G01015	-1.74954	-1.73977	UC	Q8LBK1_ARATH	Transmembrane protein.
AT5G01415	UC	UC	1.66948	- -	- -
AT5G01530	-1.99292	-2.59299	UC	LHCB4.1	Chlorophyll a-b binding protein CP29.1, chloroplastic; The light-harvesting complex (LHC) functions as a light receptor, it captures and delivers excitation energy to photosystems with which it [...]
AT5G01740	-2.2435	-2.04306	UC	T20L15.10	Nuclear transport factor 2 (NTF2) family protein.
AT5G01747	UC	UC	1.91273	- -	- -
AT5G02065	UC	UC	2.03831	A0A1P8BDX7	Transmembrane protein.
AT5G02150	UC	UC	2.25867	Fes1C	Fes1C.
AT5G02580	-1.75473	-2.28068	UC	T22P11.170	Argininosuccinate lyase.
AT5G02760	-7.04333	-6.06928	-4.9199	F9G14.70	Probable protein phosphatase 2C 67.
AT5G03130	-3.75189	-4.3142	UC	F15A17.160	Uncharacterized protein F15A17_160.
AT5G03615	-3.88652	-5.33293	UC	- -	- -
AT5G03995	-2.81497	-2.64373	UC	Q0WRE7_ARATH	Uncharacterized protein.
AT5G04190	-3.49344	-6.16749	UC	PKS4	Protein PHYTOCHROME KINASE SUBSTRATE 4; Modulates phytochrome-mediated control of hypocotyl growth orientation. Involved in PHYA and PHYB signaling. Acts as an inhibitor of asymmetric growth. No [...]
AT5G05300	-2.99646	-2.57062	UC	K18I23.10	Gb|AAF01528.1.
AT5G05340	UC	UC	2.14546	PER52	Peroxidase 52; Removal of H(2)O(2), oxidation of toxic reductants, biosynthesis and degradation of lignin, suberization, auxin catabolism, response to environmental stresses such as wounding, pa [...]
AT5G05510	-3.55282	-3.86652	UC	MOP10.5	Mad3/BUB1 homology region 1.
AT5G05890	-1.84357	-3.11968	UC	UGT76C5	UDP-glycosyltransferase 76C5; Belongs to the UDP-glycosyltransferase family.
AT5G06420	UC	UC	1.62111	MHF15.6	Zinc finger CCCH domain-containing protein 51.
AT5G06470	-3.12186	-2.94488	UC	MHF15.1	Glutaredoxin family protein.
AT5G06690	-1.28359	-1.76163	UC	WCRKC1	Thioredoxin-like 3-1, chloroplastic; Probable thiol-disulfide oxidoreductase that may participate in various redox reactions.
AT5G07455	UC	UC	2.45349	- -	- -
AT5G07510	UC	UC	2.85787	GRP14	Glycine-rich protein 14.
AT5G07570	-2.79549	-3.46585	UC	T2I1.280	Glycine/proline-rich protein.
AT5G07770	-1.63183	-1.66227	UC	FH16	Formin-like protein 16.
AT5G09805	-1.61477	-2.90695	UC	IDL3	Protein IDA-LIKE 3; May be involved in floral abscission.
AT5G09950	UC	1.8468	3.49071	PCMP-H35	Putative pentatricopeptide repeat-containing protein At5g09950; Belongs to the PPR family. PCMP-H subfamily.
AT5G09976	-2.55808	-2.29387	UC	F4KFE5_ARATH	Uncharacterized protein.
AT5G10000	UC	UC	2.32699	FD4	Probable ferredoxin-4, chloroplastic; Ferredoxins are iron-sulfur proteins that transfer electrons in a wide variety of metabolic reactions.
AT5G10180	-1.76664	-2.11205	UC	SULTR2;1	Sulfate transporter 2.1; Low-affinity H(+)/sulfate cotransporter that may be involved in root-to-shoot translocation of sulfate. Plays a central role in the regulation of sulfate assimilation; B [...]
AT5G10240	-2.1376	-1.8295	UC	ASN3	Asparagine synthetase [glutamine-hydrolyzing] 3; Essential for nitrogen assimilation, distribution and remobilization within the plant via the phloem.
AT5G10250	-3.31597	-3.29853	UC	DOT3	BTB/POZ domain-containing protein DOT3; May act as a substrate-specific adapter of an E3 ubiquitin- protein ligase complex (CUL3-RBX1-BTB) which mediates the ubiquitination and subsequent protea [...]
AT5G10570	-2.49885	-2.62598	UC	BHLH61	Transcription factor bHLH61.
AT5G10770	-1.78109	-2.99271	UC	T30N20_40	Aspartyl protease family protein At5g10770; Probably not redundant with AED1 and not involved in restriction of salicylic acid (SA) or systemic acquired resistance (SAR) signaling.
AT5G11160	-2.0815	-2.3514	UC	APT5	Adenine phosphoribosyltransferase 5; Catalyzes a salvage reaction resulting in the formation of AMP, that is energically less costly than de novo synthesis. May contribute to the recycling of ad [...]
AT5G13060	-3.19426	-2.77782	UC	ABAP1	ARMADILLO BTB ARABIDOPSIS PROTEIN 1; May act as a substrate-specific adapter of an E3 ubiquitin- protein ligase complex (CUL3-RBX1-BTB) which mediates the ubiquitination and subsequent proteasom [...]
AT5G14730	-4.2428	-3.87774	UC	T9L3.30	At5g14730.
AT5G14750	UC	UC	2.61667	WER	Transcription factor WER; Transcription activator, when associated with BHLH2/EGL3/MYC146 or BHLH12/MYC1. Involved in epidermal cell fate specification in roots and hypocotyl. Together with GL3 [...]
AT5G15265	-4.17383	-4.663	UC	Q56YM4_ARATH	Transmembrane protein.
AT5G15300	UC	UC	2.13888	PCMP-E40-2	Pentatricopeptide repeat-containing protein At5g15300; Belongs to the PPR family. PCMP-E subfamily.
AT5G16000	-1.73191	-1.54738	UC	NIK1	Protein NSP-INTERACTING KINASE 1; Involved in defense response to geminivirus and begomovirus infection via regulation of the nuclear trafficking of RPL10A. Phosphorylates RPL10A in vitro. Activ [...]
AT5G16030	-1.90042	-3.17418	UC	F1N13.170	Mental retardation GTPase activating protein.
AT5G16410	-2.80783	-5.3186	UC	MQK4.14	Similarity to N-hydroxycinnamoyl/benzoyltransferase.
AT5G16420	UC	1.00854	2.01297	MQK4.15	Pentatricopeptide repeat-containing protein At5g16420, mitochondrial.
AT5G16570	-1.8121	-2.66107	UC	GLN1-4	Glutamine synthetase cytosolic isozyme 1-4; High-affinity glutamine synthetase. May contribute to the homeostatic control of glutamine synthesis in roots.
AT5G16920	UC	UC	3.56598	F2K13.70	Fasciclin-like arabinogalactan family protein.
AT5G18010	-2.04297	-2.0328	UC	SAUR19	Auxin-responsive protein SAUR19; Functions as positive effectors of cell expansion through modulation of auxin transport; Belongs to the ARG7 family.
AT5G18050	-2.62942	-2.88011	UC	SAUR22	Auxin-responsive protein SAUR22; Functions as positive effectors of cell expansion through modulation of auxin transport.
AT5G18060	-1.45416	-2.01918	UC	SAUR23	Auxin-responsive protein SAUR23; Functions as positive effectors of cell expansion through modulation of auxin transport.
AT5G18290	-2.32765	-1.74238	UC	SIP1-2	Probable aquaporin SIP1-2; Water channel required to facilitate the transport of water across cell membrane; Belongs to the MIP/aquaporin (TC 1.A.8) family. SIP (TC 1.A.8.10) subfamily.
AT5G18690	-3.47991	-4.21969	-2.23614	AGP25	Classical arabinogalactan protein 25; Proteoglycan that seems to be implicated in diverse developmental roles such as differentiation, cell-cell recognition, embryogenesis and programmed cell de [...]
AT5G19260	-2.0478	-2.37003	UC	FAF3	Protein FANTASTIC FOUR 3; Able to repress WUS when constitutively overexpressed, but have no effect on CLV3; Belongs to the fantastic four family.
AT5G19340	-1.99077	-2.34085	UC	F7K24.90	At5g19340.
AT5G20635	-4.07572	-3.32065	UC	GG3	Guanine nucleotide-binding protein subunit gamma 3; Guanine nucleotide-binding proteins (G proteins) are involved as a modulator or transducer in various transmembrane signaling systems. The bet [...]
AT5G20820	-4.16858	-5.31158	-3.01206	SAUR76	Auxin-responsive protein SAUR76; May be involved in the regulation of ethylene receptor signaling. Promotes cell expansion and plant growth. Involved in the regulation of cell elongation.
AT5G21030	UC	UC	2.81759	AGO8	Protein argonaute 8; Involved in RNA-mediated post-transcriptional gene silencing (PTGS). Main component of the RNA-induced silencing complex (RISC) that binds to a short guide RNA such as a mic [...]
AT5G22930	-3.73987	-2.44373	UC	MRN17.16	Enabled-like protein (DUF1635).
AT5G23000	UC	UC	1.66948	RAX1	Transcription factor RAX1; Transcription activator of genes involved in the regulation of meristematic competence, such as CUC2. Positively regulates axillary meristems (AMs) formation and devel [...]
AT5G23210	-4.53188	-5.36673	-3.20832	SCPL34	Serine carboxypeptidase-like 34; Probable carboxypeptidase.
AT5G23360	-1.51182	-1.78078	UC	MKD15.22	GEM-like protein 7; Belongs to the GEM family.
AT5G23400	-3.52456	-2.98694	UC	K19M13.1	Leucine-rich repeat (LRR) family protein.
AT5G24105	-4.25401	-5.28003	-2.57257	AGP41	Arabinogalactan protein 41; Proteoglycan that seems to be implicated in diverse developmental roles such as differentiation, cell-cell recognition, embryogenesis and programmed cell death; Belon [...]
AT5G24770	UC	UC	2.63186	VSP2	Vegetative storage protein 2; May function as somatic storage protein during early seedling development; Belongs to the APS1/VSP family.
AT5G25190	-4.99644	-5.3793	-3.23307	ERF003	Ethylene-responsive transcription factor ERF003; Probably acts as a transcriptional activator. Binds to the GCC-box pathogenesis-related promoter element. May be involved in the regulation of ge [...]
AT5G25460	-2.06393	-2.38292	UC	DGR2	At5g25460.
AT5G25470	UC	UC	1.51551	T14C9.20	B3 domain-containing protein At5g25470.
AT5G25620	UC	UC	2.0527	YUC6	Indole-3-pyruvate monooxygenase YUCCA6; Involved in auxin biosynthesis via the indole-3-pyruvic acid (IPA) pathway. Also able to convert in vitro phenyl pyruvate (PPA) to phenyl acetic acid (PAA [...]
AT5G25810	-1.59981	-3.13339	UC	TINY	Ethylene-responsive transcription factor TINY; Putative transcriptional activator.
AT5G26230	-2.09475	-2.19812	UC	MAKR1	Probable membrane-associated kinase regulator 1; May negatively regulate brassinosteroid signaling.
AT5G26670	-4.85871	-5.4543	-2.09496	PAE10	Pectin acetylesterase 10; Hydrolyzes acetyl esters in homogalacturonan regions of pectin. In type I primary cell wall, galacturonic acid residues of pectin can be acetylated at the O-2 and O-3 p [...]
AT5G27360	-1.30525	-2.64052	UC	SFP2	Sugar transporter ERD6-like 18; Sugar transporter.
AT5G27550	-2.40666	-2.89909	UC	KIN14S	Kinesin-like protein KIN-14S; Belongs to the TRAFAC class myosin-kinesin ATPase superfamily. Kinesin family. KIN-14 subfamily.
AT5G27765	UC	UC	2.07606	A0A1P8BD36	Transmembrane protein.
AT5G36925	-4.71169	-6.29921	-2.79569	Q9FIW0_ARATH	Uncharacterized protein.
AT5G36970	UC	UC	2.4851	NHL25	NDR1/HIN1-like 25.
AT5G37478	UC	UC	2.48982	F4K773_ARATH	TPX2 (Targeting protein for Xklp2) protein family.
AT5G37940	-7.42124	-3.6341	UC	K18L3.100	Allyl alcohol dehydrogenase; NADP-dependent oxidoreductase-like protein.
AT5G37950	-3.64314	-2.59471	UC	AT5G37950	UDP-Glycosyltransferase superfamily protein.
AT5G37960	-1.84026	-1.89652	UC	K18L3.120	GroES-like family protein.
AT5G38990	-2.24348	-1.61654	UC	K15E6.170	Probable receptor-like protein kinase At5g38990.
AT5G39000	-2.25063	-1.53673	UC	MXF12.2	Putative receptor-like protein kinase At5g39000.
AT5G39240	-1.7672	-2.76367	UC	K3K3.14	Transcription factor UPBEAT-like protein.
AT5G39350	UC	UC	2.24811	PCMP-E16	Pentatricopeptide repeat-containing protein At5g39350; Belongs to the PPR family. PCMP-E subfamily.
AT5G39865	-3.07746	-1.99351	UC	MYH19.5	Uncharacterized protein At5g39865.
AT5G40150	-1.55633	-1.8699	UC	PER63	Peroxidase 63; Removal of H(2)O(2), oxidation of toxic reductants, biosynthesis and degradation of lignin, suberization, auxin catabolism, response to environmental stresses such as wounding, pa [...]
AT5G40382	6.01412	6.76762	8.09549	MPO12.11	Putative cytochrome c oxidase subunit 5C-4; This protein is one of the nuclear-coded polypeptide chains of cytochrome c oxidase, the terminal oxidase in mitochondrial electron transport.
AT5G40990	UC	UC	1.66948	GLIP1	GDSL esterase/lipase 1; Confers resistance to the necrotrophic fungus Alternaria brassicicola. Possesses lipase and antimicrobial activities that directly disrupt fungal spore integrity. Trigger [...]
AT5G41060	-2.77873	-2.9135	UC	PAT06	Probable protein S-acyltransferase 6; Palmitoyl acyltransferase.
AT5G41880	-2.13791	-1.97357	UC	POLA3	DNA primase; Belongs to the eukaryotic-type primase small subunit family.
AT5G43250	-1.49855	-1.66354	UC	NF-YC13	Nuclear factor Y, subunit C13.
AT5G43420	-1.38722	-2.23153	UC	ATL16	RING-H2 finger protein ATL16; Belongs to the RING-type zinc finger family. ATL subfamily.
AT5G43650	UC	UC	2.87325	BHLH92	Transcription factor bHLH92.
AT5G44260	-1.53793	-2.31191	UC	TZF5	Zinc finger CCCH domain-containing protein 61.
AT5G44306	1.49935	1.27556	3.57022	B3H5H2_ARATH	Uncharacterized protein.
AT5G44578	-3.04643	-2.87408	UC	A8MQS5_ARATH	Transmembrane protein.
AT5G44973	-1.15401	-2.0216	UC	K21C13	Defensin-like protein 285.
AT5G45650	-1.366	-2.01841	UC	SBT5.6	Subtilisin-like protease SBT5.6.
AT5G45820	-3.01142	-5.2947	UC	CIPK20	CBL-interacting serine/threonine-protein kinase 20; CIPK serine-threonine protein kinases interact with CBL proteins. Binding of a CBL protein to the regulatory NAF domain of CIPK protein lead t [...]
AT5G45880	UC	UC	1.91461	K15I22.8	Pollen Ole e 1 allergen and extensin family protein.
AT5G46220	-2.74259	-4.35556	UC	AT5G46220.1	Transmembrane protein (DUF616).
AT5G46280	-2.03279	-2.54891	UC	MCM3	DNA replication licensing factor MCM3; Probable component of the MCM2-7 complex (MCM complex) that may function as a DNA helicase and which is essential to undergo a single round of replication [...]
AT5G46330	-1.57103	-2.35125	UC	FLS2-2	LRR receptor-like serine/threonine-protein kinase FLS2; Constitutes the pattern-recognition receptor (PPR) that determines the specific perception of flagellin (flg22), a potent elicitor of the [...]
AT5G46871	-2.03393	-3.60641	UC	MSD23-4	Defensin-like protein 308.
AT5G48540	-2.77839	-2.14733	UC	CRRSP55	Cysteine-rich repeat secretory protein 55.
AT5G48600	-2.69326	-2.28067	UC	SMC4	Structural maintenance of chromosomes protein 4; Central component of the condensin complex, a complex required for conversion of interphase chromatin into mitotic-like condense chromosomes. The [...]
AT5G49360	-1.81281	-2.88944	UC	BXL1	Beta-D-xylosidase 1; Involved in pectic arabinan modification in mucilage secretory cells. Acts also as a beta-D-xylosidase during the remodeling of xylans in vascular development; Belongs to th [...]
AT5G49600	UC	UC	2.08173	K6M13.16	Similarity to unknown protein.
AT5G49630	-3.32456	-3.78175	UC	AAP6	Amino acid permease 6; Amino acid-proton symporter. Stereospecific transporter with a broad specificity for tryptophan, proline, and neutral and acidic amino acids. Has an affinity for aspartate [...]
AT5G49690	UC	UC	3.96871	UGT91C1	UDP-glycosyltransferase 91C1; Belongs to the UDP-glycosyltransferase family.
AT5G49730	-2.14695	-2.67063	UC	FRO6	Ferric reduction oxidase 6; Ferric chelate reductase involved in iron uptake by shoot and leaf cells. May participate in the transport of electrons to a Fe(3+) ion via FAD and heme intermediates.
AT5G49740	-1.75947	-2.2849	UC	FRO7	Ferric reduction oxidase 7, chloroplastic; Ferric chelate reductase involved in iron mobilization from the cytosol into the chloroplast. May participate in the transport of electrons to a Fe(3+) [...]
AT5G49800	-4.43796	-3.4486	-2.38467	K21G20.1	Polyketide cyclase/dehydrase and lipid transport superfamily protein.
AT5G50010	-1.29844	-1.83005	UC	BHLH145	Transcription factor bHLH145.
AT5G50335	-4.23737	-3.84956	UC	Q8LEB7_ARATH	At5g50335.
AT5G51160	UC	UC	2.78522	MWD22.10	Ankyrin repeat family protein.
AT5G51380	-2.91853	-2.23676	UC	MFG13.9	F-box protein At5g51380.
AT5G51440	UC	UC	2.64504	HSP23.5	23.5 kDa heat shock protein, mitochondrial; Belongs to the small heat shock protein (HSP20) family.
AT5G51600	-2.21582	-3.68054	UC	MAP65-3	65-kDa microtubule-associated protein 3; Microtubule-associated protein that plays a critical role in organizing the mitotic microtubule array during both early and late mitosis in all plant org [...]
AT5G51720	-5.38597	-5.21706	-3.46289	NEET	CDGSH iron-sulfur domain-containing protein NEET; Plays an important role in plant development, senescence, reactive oxygen homeostasis, and iron metabolism. Acts as an iron- sulfur transfer pro [...]
AT5G51795	-1.90282	-2.4127	UC	KLP	KIN17-like protein KLP; May act as repressor of root growth during copper excess and of hypocotyl growth in the dark; Belongs to the KIN17 family.
AT5G51890	UC	UC	1.86662	PER66	Peroxidase 66; Removal of H(2)O(2), oxidation of toxic reductants, biosynthesis and degradation of lignin, suberization, auxin catabolism, response to environmental stresses such as wounding, pa [...]
AT5G52250	-1.70602	-1.67674	UC	RUP1	WD repeat-containing protein RUP1; Functions in association with RUP2 as repressor of UV-B- induced photomorphogenesis mediated by UVR8 and HY5. Plays a crucial negative feedback regulatory role [...]
AT5G52330	UC	UC	1.90753	K24M7.6	Similarity to unknown protein.
AT5G52600	-1.71698	-1.65678	UC	MYB82	Transcription factor MYB82; Transcription activation factor positively regulating trichomes development. Has a function nearly equivalent to that of GL1 and can complement gl1 mutants.
AT5G53980	-3.36928	-3.03649	UC	ATHB-52	Homeobox-leucine zipper protein ATHB-52; Probable transcription factor.
AT5G54510	-1.6946	-2.06567	UC	GH3.6	Indole-3-acetic acid-amido synthetase GH3.6; Catalyzes the synthesis of indole-3-acetic acid (IAA)-amino acid conjugates, providing a mechanism for the plant to cope with the presence of excess [...]
AT5G54530	-2.20123	-2.38481	UC	MRB17.3	Uncharacterized protein At5g54530/MRB17_3.
AT5G55150	UC	UC	2.15775	MCO15.10	Putative F-box protein At5g55150.
AT5G55520	-4.80776	-4.35119	UC	MTE17.24	Kinesin-like protein.
AT5G55680	-3.4411	-2.64814	UC	MDF20.12	Glycine-rich protein.
AT5G56230	-2.25824	-1.62018	UC	PRA1G2	PRA1 family protein G2; May be involved in both secretory and endocytic intracellular trafficking in the endosomal/prevacuolar compartments.
AT5G56510	UC	UC	2.15775	APUM12	Pumilio homolog 12; Sequence-specific RNA-binding protein that regulates translation and mRNA stability by binding the 3'-UTR of target mRNAs.
AT5G56530	-2.01368	-2.3016	UC	MKN22.4	Similarity to carboxyl-terminal proteinase.
AT5G56960	-3.59539	-3.24399	UC	BHLH41	Putative transcription factor bHLH041.
AT5G57780	-2.70736	-2.61498	UC	P1R1	Transcription factor.
AT5G59080	-2.79652	-2.67387	UC	K18B18.8	Emb|CAB82975.1.
AT5G59305	-4.55602	-4.58365	UC	CLE46	CLAVATA3/ESR (CLE)-related protein 46; Extracellular signal peptide that regulates cell fate.
AT5G59860	UC	UC	2.16039	MMN10.9	RNA-binding (RRM/RBD/RNP motifs) family protein.
AT5G60140	UC	UC	3.09303	MGO3.2	B3 domain-containing protein At5g60140.
AT5G60200	-1.84826	-2.23484	UC	DOF5.3	Dof zinc finger protein DOF5.3; Transcription factor that binds specifically to a 5'-AA[AG]G- 3' consensus core sequence (By similarity). The PEAR proteins (e.g. DOF2.4, DOF5.1, DOF3.2, DOF1.1, [...]
AT5G62360	-6.68883	-7.42052	-5.47193	MMI9.1	Ripening-related protein-like; contains similarity to pectinesterase.
AT5G62830	UC	UC	1.91461	MQB2.15	F-box associated ubiquitination effector family protein.
AT5G62920	-3.42785	-3.60003	UC	ARR6	Two-component response regulator ARR6; Functions as response regulator involved in His-to-Asp phosphorelay signal transduction system. Phosphorylation of the Asp residue in the receiver domain a [...]
AT5G62998	UC	UC	2.62043	B3H644_ARATH	Uncharacterized protein.
AT5G63087	-3.22567	-2.69889	UC	A8MSA5_ARATH	Plant thionin family protein.
AT5G64170	UC	UC	1.6941	LNK1	Protein LNK1; Transcriptional coactivator necessary for expression of the clock genes PRR5 and TOC1. Antagonizes REV8 function in the regulation of anthocyanin accumulation. Involved in red ligh [...]
AT5G64630	-1.14822	-1.82256	UC	FAS2	Chromatin assembly factor 1 subunit FAS2; Component of the chromatin assembly factor complex (CAF-1) involved in chromatin assembly following DNA replication and DNA repair. Required for several [...]
AT5G64850	-1.74797	-2.53421	UC	MXK3.7	Sorbin/SH3 domain protein.
AT5G64900	-2.00736	-1.91864	UC	PEP1	Elicitor peptide 1; Elicitor of plant defense. Induces the production of plant defensin (PDF1.2) and of H(2)O(2). Promotes resistance to the root fungal pathogen P.irregulare.
AT5G66570	-1.27743	-1.77459	UC	PSBO1	Oxygen-evolving enhancer protein 1-1, chloroplastic; Stabilizes the manganese cluster which is the primary site of water splitting.
AT5G66770	-1.7475	-2.28971	UC	SCL4	Scarecrow-like protein 4; Probable transcription factor involved in plant development. Belongs to the GRAS family.
AT5G67390	-1.95918	-2.46083	UC	K8K14.12	Glycosyltransferase-like protein.
AT5G67460	-3.13328	-3.11801	UC	K9I9.2	O-Glycosyl hydrolases family 17 protein; Belongs to the glycosyl hydrolase 17 family.
ATCG00760	-1.82753	-1.08186	UC	rpl36	50S ribosomal protein L36, chloroplastic.
ATCG01090	-4.48598	-1.78152	UC	ndhI	NAD(P)H-quinone oxidoreductase subunit I, chloroplastic; NDH shuttles electrons from NAD(P)H:plastoquinone, via FMN and iron-sulfur (Fe-S) centers, to quinones in the photosynthetic chain and po [...]
ATMG00440	UC	UC	2.46491	M440_ARATH	Uncharacterized mitochondrial protein AtMg00440/AtMg01140.
ATMG00630	UC	UC	2.47764	M630_ARATH	Uncharacterized mitochondrial protein AtMg00630.
ATMG00720	UC	UC	1.91273	M720_ARATH	Uncharacterized mitochondrial protein AtMg00720.
ATMG00860	UC	UC	2.8523	M860_ARATH	Uncharacterized mitochondrial protein AtMg00860.
ATMG00930	UC	UC	1.91273	- -	- -
ATMG01140	UC	UC	2.46491	M440_ARATH	Uncharacterized mitochondrial protein AtMg00440/AtMg01140.

## Sheet: Cluster 4
Gene_ ID	Log2FC WT	log2FC 10b	Log2FC OX-1	Gene Name	Annotation /Function
AT1G01480	4.44246	4.79619	UC	ACS2	1-aminocyclopropane-1-carboxylate synthase 2; 1-aminocyclopropane-1-carboxylate synthase (ACS
AT1G01700	1.8244	1.40972	UC	ROPGEF2	Rop guanine nucleotide exchange factor 2; Guanine-nucleotide exchange factor (GEF) that acts as an activator of Rop (Rho of plants) GTPases by promoting the exchange of GDP for GTP.
AT1G03840	UC	UC	-2.52025	MGP	Zinc finger protein MAGPIE; Transcription factor that regulates tissue boundaries and asymmetric cell division. Contributes to the sequestration of 'SHORT-ROOT' to the nucleus. Interacts with th [...]
AT1G04217	2.33922	1.45609	UC	- -	- -
AT1G04600	UC	UC	-1.7386	XI-A	Myosin-7; Myosin heavy chain that is required for the cell cycle- regulated transport of various organelles and proteins for their segregation. Functions by binding with its tail domain to recep [...]
AT1G04660	-2.47639	-1.81504	-3.68506	T1G11.8	Glycine-rich protein.
AT1G04877	UC	UC	-1.66331	- -	- -
AT1G06033	1.93849	1.97232	UC	- -	- -
AT1G06447	UC	UC	-2.67952	- -	- -
AT1G06733	2.9767	2.48393	UC	- -	- -
AT1G07957	3.35857	3.77764	UC	- -	- -
AT1G08280	UC	UC	-1.67529	GALT29A	Beta-1,6-galactosyltransferase GALT29A; Galactosyltransferase involved in the biosynthesis of type II arabinogalactan. Possesses galactosyltransferase (GalT) activity in vitro, transferring gala [...]
AT1G08573	2.81397	3.03097	UC	- -	- -
AT1G08810	UC	UC	-1.95173	MYB60	Transcription factor MYB60; Transcription factor involved in the regulation of gene (e.g. drought-regulated and flavonoid biosynthetic genes) expression and stomatal movements leading to negativ [...]
AT1G09087	1.70609	2.54543	UC	- -	- -
AT1G09533	2.03493	2.06964	UC	- -	- -
AT1G09693	2.32646	1.9137	UC	- -	- -
AT1G09697	3.42452	4.04698	UC	- -	- -
AT1G09867	1.9853	2.00619	UC	- -	- -
AT1G09913	UC	UC	-1.74686	- -	- -
AT1G10680	UC	UC	-2.40162	ABCB10	ABC transporter B family member 10; Belongs to the ABC transporter superfamily. ABCB family. Multidrug resistance exporter (TC 3.A.1.201) subfamily.
AT1G12013	1.98807	2.27695	UC	- -	- -
AT1G12064	5.0526	4.50201	UC	Q1G3V1_ARATH	Transmembrane protein.
AT1G12672	2.67003	4.51996	UC	F4IDV2_ARATH	Thionin-like protein.
AT1G13609	UC	UC	-1.91153	F13B4-2	Defensin-like protein 287; Belongs to the DEFL family.
AT1G13830	2.33675	1.70403	UC	F16A14.5	Carbohydrate-binding X8 domain superfamily protein.
AT1G14520	1.31308	1.70055	UC	MIOX1	Inositol oxygenase 1; Involved in the biosynthesis of UDP-glucuronic acid (UDP- GlcA), providing nucleotide sugars for cell-wall polymers. May be also involved in plant ascorbate biosynthesis.
AT1G14720	1.57672	1.75785	UC	XTH28	Probable xyloglucan endotransglucosylase/hydrolase protein 28; Catalyzes xyloglucan endohydrolysis (XEH) and/or endotransglycosylation (XET). Cleaves and religates xyloglucan polymers, an essent [...]
AT1G14730	2.52523	2.7274	UC	CYB561C	Probable transmembrane ascorbate ferrireductase 3; Two-heme-containing cytochrome. May catalyze ascorbate- dependent trans-membrane ferric-chelate reduction (By similarity).
AT1G15960	2.0124	1.66081	UC	NRAMP6	Metal transporter Nramp6; Probable intracellular cadmium (Cd) transporter that participates in the distribution or availability of Cd within the cell.
AT1G16120	2.5067	1.96557	UC	WAKL1	Wall-associated receptor kinase-like 1; Serine/threonine-protein kinase that may function as a signaling receptor of extracellular matrix component.
AT1G16330	UC	UC	-1.98392	CYCB3-1	Putative cyclin-B3-1; Belongs to the cyclin family. Cyclin AB subfamily.
AT1G16830	1.99576	1.01894	UC	F17F16.24	Putative pentatricopeptide repeat-containing protein At1g16830; Belongs to the PPR family. P subfamily.
AT1G17140	UC	UC	-2.52453	ICR1	Interactor of constitutive active ROPs 1; Acts as a scaffold, mediating interaction of ROPs with different proteins. Required for primary and adventitious root maintenance, but not for their for [...]
AT1G17520	1.71896	1.43023	UC	F1L3.23	Telomere repeat-binding factor 4; Binds preferentially double-stranded telomeric repeats.
AT1G17830	2.26947	2.18659	UC	F2H15.6	F2H15.6 protein.
AT1G20060	UC	UC	-2.63329	KIN6	Kinesin-like protein KIN-6; Belongs to the TRAFAC class myosin-kinesin ATPase superfamily. Kinesin family. KIN-6 subfamily.
AT1G21529	4.89513	5.66321	3.60924	- -	- -
AT1G22065	1.32931	1.89851	UC	Q1G3T6_ARATH	Uncharacterized protein.
AT1G23280	1.59023	1.7475	UC	F26F24.12	Protein MAK16 homolog; Belongs to the MAK16 family.
AT1G23450	2.76299	2.25155	UC	F28C11.30	PPR superfamily protein.
AT1G23550	2.13941	1.8255	UC	SRO2	Probable inactive poly [ADP-ribose] polymerase SRO2; Probable inactive ADP-ribosyltransferase that may be involved in stress and developmental responses.
AT1G24580	6.53558	7.01831	3.95172	Q9FYK6_ARATH	RING/U-box superfamily protein.
AT1G24735	1.88428	2.10725	UC	F5A9.20	S-adenosyl-L-methionine-dependent methyltransferases superfamily protein.
AT1G24851	1.85441	2.85359	UC	F5A9.15	F5A9.15.
AT1G25180	1.85817	2.82489	UC	F4F7.40	At1g25025.
AT1G26200	UC	UC	-3.82423	F28B23.26	TRAM, LAG1 and CLN8 (TLC) lipid-sensing domain containing protein.
AT1G26310	UC	UC	-1.70248	CAL	Transcription factor CAULIFLOWER; Probable transcription factor that promotes early floral meristem identity in synergy with APETALA1, FRUITFULL and LEAFY. Is required subsequently for the trans [...]
AT1G26760	UC	UC	-2.77486	- -	- -
AT1G27170	1.72316	2.95326	UC	T7N9.23	Transmembrane receptors / ATP binding protein.
AT1G27470	1.03854	1.74145	UC	F17L21.26	Transducin family protein / WD-40 repeat family protein.
AT1G28360	2.77029	2.42948	UC	ERF12	Ethylene-responsive transcription factor 12; Involved in the regulation of gene expression by stress factors and by components of stress signal transduction pathways. Transcription factor that b [...]
AT1G28765	2.0445	2.35698	UC	A0A1P8ARS6	Uncharacterized protein.
AT1G29330	1.32967	1.87181	UC	ERD2A	ER lumen protein-retaining receptor A; Required for the retention of luminal endoplasmic reticulum proteins. Determines the specificity of the luminal ER protein retention system. Also required [...]
AT1G29680	3.30527	2.49503	UC	OBAP2C	Oil body-associated protein 2C.
AT1G30050	UC	UC	-1.98682	T1P2.7	Tropomyosin.
AT1G30140	2.23193	2.70478	UC	T2H7.6	Myb/SANT-like DNA-binding domain protein.
AT1G31790	2.21199	1.73923	UC	PCMP-A1	Pentatricopeptide repeat-containing protein At1g31790; Belongs to the PPR family. PCMP-A subfamily.
AT1G31835	1.64072	1.79282	UC	A0A1P8APS1	Uncharacterized protein.
AT1G33030	1.79495	2.87846	UC	F9L11.18	O-methyltransferase family protein; Belongs to the class I-like SAM-binding methyltransferase superfamily. Cation-independent O-methyltransferase family.
AT1G33260	1.50068	2.33334	UC	T16O9.6	Probable receptor-like protein kinase At1g33260.
AT1G33700	1.4709	1.68583	UC	F14M2.16	Non-lysosomal glucosylceramidase; Non-lysosomal glucosylceramidase that catalyzes the hydrolysis of glucosylceramide (GlcCer) to free glucose and ceramide.
AT1G34580	UC	UC	-1.83023	STP5	Sugar transport protein 5; Mediates an active uptake of hexoses, probably by sugar/hydrogen symport; Belongs to the major facilitator superfamily. Sugar transporter (TC 2.A.1.1) family.
AT1G36380	1.44544	1.72997	UC	F7F23.10	Transmembrane protein.
AT1G44970	UC	UC	-3.59067	PER9	Peroxidase 9; Removal of H(2)O(2), oxidation of toxic reductants, biosynthesis and degradation of lignin, suberization, auxin catabolism, response to environmental stresses such as wounding, pat [...]
AT1G49200	1.9327	2.12644	UC	ATL75	RING-H2 finger protein ATL75; Belongs to the RING-type zinc finger family. ATL subfamily.
AT1G49960	2.68237	2.77367	UC	NAT4	Nucleobase-ascorbate transporter 4; Belongs to the xanthine/uracil permease family. Nucleobase:cation symporter-2 (NCS2) (TC 2.A.40) subfamily.
AT1G50240	-2.3313	-2.98536	-4.12731	TIO	Serine/threonine-protein kinase TIO; Plays a role in conventional modes of cytokinesis in meristems and during male gametogenesis but also acts in nonconventional modes of cytokinesis (cellulari [...]
AT1G50930	4.22496	5.39277	UC	VUP2	Vascular-related unknown protein 2; Involved in the regulation of plant growth.
AT1G51055	UC	UC	-1.91153	F4I7Z1_ARATH	FBD-like domain family protein.
AT1G51850	UC	UC	-2.74931	T14L22.6	Leucine-rich repeat protein kinase family protein.
AT1G52690	12.2436	12.404	10.336	LEA7	Late embryogenesis abundant protein 7; Involved in dehydration and freezing tolerance. Protects and stabilizes the enzyme activities of ADP-glucose-pyrophosphorylase (AGPase) and glucose-6-phosp [...]
AT1G52990	1.82429	2.09566	UC	F8L10.14	Thioredoxin family protein.
AT1G53160	1.70515	1.77356	UC	SPL4	Squamosa promoter-binding-like protein 4; Trans-acting factor that binds specifically to the consensus nucleotide sequence 5'-TNCGTACAA-3' of AP1 promoter. Promotes both vegetative phase change [...]
AT1G53470	2.95757	3.18986	UC	MSL4	Mechanosensitive ion channel protein 4; Mechanosensitive channel that opens in response to stretch forces in the membrane lipid bilayer; Belongs to the MscS (TC 1.A.23) family.
AT1G53540	5.60487	5.85729	UC	HSP17.6C	17.6 kDa class I heat shock protein 3; Belongs to the small heat shock protein (HSP20) family.
AT1G53655	1.96021	2.75349	UC	A0A1P8ANT2	Transmembrane protein.
AT1G54120	1.49959	1.58748	UC	F15I1.22	F15I1.22.
AT1G54260	1.67847	1.50662	UC	F20D21.8	Winged-helix DNA-binding transcription factor family protein.
AT1G58120	UC	UC	-1.98392	T15M6.13	Uncharacterized protein At1g58120/68103_m00121.
AT1G59530	2.75477	2.0489	UC	BZIP4	Basic leucine zipper 4; Probable transcription factor involved in somatic embryogenesis. Acts as positive regulator of BHLH109.
AT1G60110	UC	UC	-4.22937	JAL17	Jacalin-related lectin 17; Belongs to the jacalin lectin family.
AT1G60470	3.07282	5.11144	UC	GOLS4	Galactinol synthase 4; Galactinol synthase involved in the biosynthesis of raffinose family oligosaccharides (RFOs) that function as osmoprotectants. May promote plant stress tolerance (By simil [...]
AT1G60620	1.77976	1.60649	UC	F8A5.14	RNA polymerase subunit (Isoform B).
AT1G60680	2.44433	4.0553	UC	AGD2	Probable aldo-keto reductase 2; Belongs to the aldo/keto reductase family. Aldo/keto reductase 13 subfamily.
AT1G61130	UC	UC	-1.73723	SCPL32	Serine carboxypeptidase-like 32; Probable carboxypeptidase.
AT1G62305	1.90809	1.32128	UC	AT1G62305	Core-2/I-branching beta-1,6-N-acetylglucosaminyltransferase family protein.
AT1G62320	UC	UC	-1.73723	F24O1.4	CSC1-like protein At1g62320; Acts as an osmosensitive calcium-permeable cation channel. Belongs to the CSC1 (TC 1.A.17) family.
AT1G62700	UC	UC	-2.51047	NAC026	NAC domain-containing protein 26; Transcription activator that binds to the secondary wall NAC binding element (SNBE), 5'- (T/A)NN(C/T)(T/C/G)TNNNNNNNA(A/C)GN(A/C/T)(A/T)-3', in the promoter of [...]
AT1G63630	UC	UC	-2.15685	F2K11.2	Tetratricopeptide repeat (TPR)-like superfamily protein.
AT1G64450	UC	UC	-1.63339	F15H21.17	Glycine-rich protein family.
AT1G64690	1.43998	1.90838	UC	BLT	Protein BRANCHLESS TRICHOME; Acts as a key regulator of trichome branching. Could participate with STI in the same pathway. Also plays a role in integrating endoreplication levels with cell shap [...]
AT1G66040	UC	UC	-2.0295	ORTH4	Putative E3 ubiquitin-protein ligase ORTHRUS 4; E3 ubiquitin-protein ligase. May participate in CpG methylation-dependent transcriptional regulation (By similarity).
AT1G66050	UC	-1.49713	-3.50297	ORTH5	E3 ubiquitin-protein ligase ORTHRUS 5; E3 ubiquitin-protein ligase. Participates in CpG methylation- dependent transcriptional regulation and epigenetic transcriptional silencing. Mediates ubiqu [...]
AT1G66173	UC	UC	-3.43706	- -	- -
AT1G67320	UC	UC	-1.52343	EMB2813	Probable DNA primase large subunit; DNA primase is the polymerase that synthesizes small RNA primers for the Okazaki fragments made during discontinuous DNA replication; Belongs to the eukaryoti [...]
AT1G67630	UC	UC	-1.83525	POLA2	DNA polymerase alpha subunit B; Accessory subunit of the DNA polymerase alpha complex (also known as the alpha DNA polymerase-primase complex) which plays an essential role in the initiation of [...]
AT1G67650	1.46191	1.61221	UC	F12A21.20	Signal recognition particle subunit SRP72; Signal-recognition-particle assembly has a crucial role in targeting secretory proteins to the rough endoplasmic reticulum membrane; Belongs to the SRP [...]
AT1G68170	UC	UC	-1.98682	UMAMIT23	WAT1-related protein At1g68170.
AT1G68250	5.34239	6.31143	UC	T22E19.12	At1g68250.
AT1G68500	2.61487	2.96163	UC	T26J14.7	Uncharacterized protein At1g68500.
AT1G68510	UC	UC	-1.90677	LBD42	LOB domain-containing protein 42; Belongs to the LOB domain-containing protein family.
AT1G69085	UC	UC	-1.98392	A0A1P8AUA6	E3 ubiquitin-protein ligase.
AT1G69490	2.68469	2.38775	UC	NAC029	NAC transcription factor 29; Transcription activator that binds to, and transactivates the promoter of the abscisic aldehyde oxidase AAO3. Promotes chlorophyll degradation in leaves by enhancing [...]
AT1G70720	3.1026	3.035	UC	F5A18.10	Plant invertase/pectin methylesterase inhibitor superfamily protein.
AT1G70800	1.4601	2.24084	UC	CAR6	Protein C2-DOMAIN ABA-RELATED 6; Stimulates the GTPase/ATPase activities of Obg-like ATPases (By similarity). Mediates the transient calcium-dependent interaction of PYR/PYL/RCAR abscisic acid ( [...]
AT1G70880	UC	-2.22291	-3.46337	MLP15	Polyketide cyclase/dehydrase and lipid transport superfamily protein.
AT1G70985	UC	UC	-1.87921	Q8LGG2_ARATH	Hydroxyproline-rich glycoprotein family protein.
AT1G71000	4.14619	5.67073	UC	F15H11.19	Chaperone DnaJ-domain superfamily protein.
AT1G71110	2.2792	1.90926	UC	F23N20.10	Transmembrane protein.
AT1G72040	1.61817	1.41069	UC	dNK	P-loop containing nucleoside triphosphate hydrolases superfamily protein.
AT1G72210	1.78464	1.09994	UC	BHLH96	Transcription factor bHLH96.
AT1G72660	3.00401	3.64031	UC	DRG2	Developmentally-regulated G-protein 2; Binds GDP and GTP, and has low GTPase activity.
AT1G75110	1.71329	1.81321	UC	RRA2	Arabinosyltransferase RRA2; Plays a role in the arabinosylation of cell wall components. Involved in the arabinosylation of extensin proteins in root hair cells. Extensins are structural glycopr [...]
AT1G75290	2.17161	2.26129	UC	F22H5.18	NAD(P)-binding Rossmann-fold superfamily protein.
AT1G75830	2.93637	2.39071	UC	PDF1.1	Defensin-like protein 13; Confers broad-spectrum resistance to pathogens. Possesses antifungal activity sensitive to inorganic cations in vitro. Belongs to the DEFL family.
AT1G76420	UC	UC	-1.98682	NAC031	Protein CUP-SHAPED COTYLEDON 3; Transcription activator. Involved in molecular mechanisms regulating shoot apical meristem (SAM) formation during embryogenesis and organ separation. Required for [...]
AT1G76530	UC	UC	-2.15027	PILS4	Protein PIN-LIKES 4; Involved in cellular auxin homeostasis by regulating auxin metabolism. Regulates intracellular auxin accumulation at the endoplasmic reticulum and thus auxin availability fo [...]
AT1G77093	1.97821	1.93736	UC	F22K20	Defensin-like protein 281.
AT1G77960	1.61347	1.46692	UC	F28K19.17	Repressor ROX1-like protein.
AT1G78610	1.35987	1.63616	UC	MSL6	Mechanosensitive ion channel protein 6; Mechanosensitive channel that opens in response to stretch forces in the membrane lipid bilayer; Belongs to the MscS (TC 1.A.23) family.
AT1G78930	1.95302	1.84487	UC	YUP8H12R.46	Mitochondrial transcription termination factor family protein.
AT1G79260	1.69154	1.72285	UC	YUP8H12R.14	UPF0678 fatty acid-binding protein-like protein At1g79260; May play a role in the intracellular transport of hydrophobic ligands.
AT1G79310	UC	UC	-2.77009	AMC7	Metacaspase-7; Belongs to the peptidase C14B family.
AT1G80100	UC	UC	-1.73723	AHP6	Pseudo histidine-containing phosphotransfer protein 6; Functions as two-component phosphorelay mediators between cytokinin sensor histidine kinases and response regulators (B-type ARRs). Plays a [...]
AT1G80245	0.96436	1.77009	UC	Q0V7R8_ARATH	Spc97 / Spc98 family of spindle pole body (SBP) component.
AT1G80570	2.07741	1.66124	UC	FBL14	F-box/LRR-repeat protein 14.
AT1G80890	1.37613	1.95256	UC	F23A5.25	F23A5.25 protein.
AT2G01818	UC	-2.18714	-3.42657	A8MQN6_ARATH	PLATZ transcription factor family protein.
AT2G02120	3.42448	5.08414	UC	PDF2.1	Defensin-like protein 4; Confers broad-spectrum resistance to pathogens.
AT2G02147	UC	UC	-4.06453	LCR73	Defensin-like protein 8.
AT2G05510	2.05235	3.54371	UC	T20G20.14	Putative glycine-rich protein.
AT2G08725	2.22639	1.81473	UC	- -	- -
AT2G10606	UC	UC	-2.18222	- -	- -
AT2G16890	1.50375	1.8015	UC	UGT90A1	UDP-glycosyltransferase 90A1.
AT2G20560	3.03346	4.42695	UC	T13C7.15	DNAJ heat shock family protein.
AT2G21490	3.53114	2.71611	UC	LEA	Probable dehydrin LEA; Belongs to the plant dehydrin family.
AT2G22610	UC	UC	-3.4786	KIN14R	Kinesin-like protein KIN-14R.
AT2G23110	5.0542	5.29215	UC	F21P24.17	Similar to late embryogenesis abundant proteins.
AT2G23910	2.64988	3.39896	UC	T29E15.11	NAD(P)-binding Rossmann-fold superfamily protein.
AT2G25090	3.32371	4.73075	UC	CIPK16	CBL-interacting serine/threonine-protein kinase 16; CIPK serine-threonine protein kinases interact with CBL proteins. Binding of a CBL protein to the regulatory NAF domain of CIPK protein lead t [...]
AT2G25690	1.52795	1.5279	UC	FLZ11	FCS-Like Zinc finger 11; May act as an adapter to facilitate the interaction of SnRK1 complex with effector proteins, conferring tissue- and stimulus-type specific differences in the SnRK1 regul [...]
AT2G25780	UC	UC	-1.91153	F17H15.19	Uncharacterized protein At2g25780.
AT2G25940	4.85096	2.55253	UC	ALPHA-VPE	Vacuolar-processing enzyme alpha-isozyme; Asparagine-specific endopeptidase involved in the processing of vacuolar seed protein precursors into the mature forms. Probably involved in post-transl [...]
AT2G26010	-4.39638	-4.79309	-6.07421	PDF1.3	Defensin-like protein 14; Confers broad-spectrum resistance to pathogens. Has antifungal activity in vitro; Belongs to the DEFL family.
AT2G26020	-5.08843	-4.97206	-6.57636	PDF1.2B	Putative defensin-like protein 15; Confers broad-spectrum resistance to pathogens; Belongs to the DEFL family.
AT2G27035	UC	UC	-2.38681	ENODL20	Early nodulin-like protein 20.
AT2G27300	6.76988	7.28274	UC	NTL8	NAC domain-containing protein 40; Transcriptional activator activated by proteolytic cleavage through regulated intramembrane proteolysis (RIP), probably via metalloprotease activity. Regulates [...]
AT2G28440	3.95888	3.46942	UC	T1B3.4	En/Spm-like transposon protein.
AT2G29380	5.7051	5.70516	UC	HAI3	Probable protein phosphatase 2C 24.
AT2G29500	2.01383	3.65422	UC	HSP17.6B	17.6 kDa class I heat shock protein 2; Belongs to the small heat shock protein (HSP20) family.
AT2G29640	1.2044	1.73847	UC	JOSL	Josephin-like protein; May act as a deubiquitinating enzyme.
AT2G29710	UC	UC	-1.74886	UGT71D2	UDP-glycosyltransferase 71D2; Belongs to the UDP-glycosyltransferase family.
AT2G30600	UC	UC	-3.14077	Y2060_ARATH	BTB/POZ domain-containing protein At2g30600; May act as a substrate-specific adapter of an E3 ubiquitin- protein ligase complex (CUL3-RBX1-BTB) which mediates the ubiquitination and subsequent p [...]
AT2G31141	1.63976	1.7941	UC	F4IPX8_ARATH	Uncharacterized protein.
AT2G33070	3.51749	5.12962	UC	NSP2	Nitrile-specifier protein 2; Promotes simple nitriles, but not epithionitrile or thiocyanate formation. Converts allylglucosinolate and benzylglucosinolate to their corresponding simple nitriles [...]
AT2G34180	UC	UC	-2.64868	CIPK13	CBL-interacting serine/threonine-protein kinase 13; CIPK serine-threonine protein kinases interact with CBL proteins. Binding of a CBL protein to the regulatory NAF domain of CIPK protein lead t [...]
AT2G34190	UC	-2.67628	-3.94491	NAT2	Nucleobase-ascorbate transporter 2.
AT2G35210	UC	UC	-2.5302	AGD10	ADP-ribosylation factor GTPase-activating protein AGD10; GTPase-activating protein (GAP) for ADP ribosylation factor (ARF). Activates ARF1 and ARF2. Required for female gametophyte development. [...]
AT2G35420	UC	UC	-1.91153	ATL28	RING-H2 finger protein ATL28; Belongs to the RING-type zinc finger family. ATL subfamily.
AT2G35550	2.31328	2.07408	UC	BPC7	Protein BASIC PENTACYSTEINE7; Transcriptional regulator that specifically binds to GA-rich elements (GAGA-repeats) present in regulatory sequences of genes involved in developmental processes; B [...]
AT2G35930	UC	-1.72208	-4.49427	PUB23	E3 ubiquitin-protein ligase PUB23; E3 ubiquitin-protein ligase that negatively regulates water stress response. May control in coordination with PUB23 a drought signaling pathway by ubiquitinati [...]
AT2G36080	1.91513	1.17061	UC	ARF31	B3 domain-containing protein At2g36080.
AT2G36770	4.35974	3.91781	UC	UGT73C4	UDP-glycosyltransferase 73C4; Belongs to the UDP-glycosyltransferase family.
AT2G37510	UC	UC	-1.9395	F3G5.30	RNA-binding (RRM/RBD/RNP motifs) family protein.
AT2G37530	1.80606	1.46168	UC	F13M22.3	Forkhead box protein G1.
AT2G37770	4.96269	4.42823	UC	AKR4C9	NADPH-dependent aldo-keto reductase, chloroplastic; Oxidoreductase acting on a broad range of substrates: reduces ketosteroids, aromatic aldehydes, ketones, sugars and other aliphatic aldehydes, [...]
AT2G38400	1.59684	1.90504	UC	AGT3	Alanine--glyoxylate aminotransferase 2 homolog 2, mitochondrial.
AT2G38905	3.26807	3.45819	UC	Q941D7_ARATH	Low temperature and salt responsive protein family.
AT2G38920	2.35066	2.96442	UC	RF178	Probable E3 ubiquitin-protein ligase BAH1-like; Belongs to the RING-type zinc finger family.
AT2G40790	1.94501	3.44335	UC	CXXS2	Thioredoxin-like protein CXXS2; Possesses low disulfide reductase activity, but efficient protein disulfide isomerase activity. Does not possess deglutathionylation activity.
AT2G41990	-6.12368	-5.76171	-8.33306	T6D20.12	Late embryogenesis abundant protein.
AT2G42000	6.08346	7.40574	UC	MT4A	Metallothionein-like protein 4A; Metallothioneins have a high content of cysteine residues that bind various heavy metals (Probable). Functions as metal chelator of copper (Cu) and zinc (Zn). Pl [...]
AT2G42560	8.8671	9.14997	UC	F14N22.17	Late embryogenesis abundant domain-containing protein / LEA domain-containing protein.
AT2G42955	UC	UC	-1.994	F7D19.3	F-box/LRR protein.
AT2G43590	4.58246	5.35152	3.10751	F18O19.30	Endochitinase At2g43590.
AT2G43600	UC	UC	-1.98392	F18O19.29	Inactive endochitinase At2g43600; Belongs to the glycosyl hydrolase 19 family. Chitinase class I subfamily.
AT2G44810	UC	UC	-2.14662	DAD1-2	Phospholipase A(1) DAD1, chloroplastic; Sn-1-specific phospholipase that releases free fatty acids from phospholipids. Low activity on galactolipids and triacylglycerols. Catalyzes the initial s [...]
AT2G45490	UC	UC	-2.84253	AUR3	Serine/threonine-protein kinase Aurora-3; Phosphorylates in vitro histone H3 at 'Ser-10' (H3S10ph) and 'Ser-28' (H3S28ph), but not at 'Thr-3' (H3T3ph) or 'Thr-11' (H3T11ph). Colocalizes with pho [...]
AT2G45570	4.99315	6.20178	UC	CYP76C2	Cytochrome P450 76C2; Belongs to the cytochrome P450 family.
AT2G46810	UC	UC	-1.52289	BHLH70	Transcription factor bHLH70.
AT2G47870	1.69502	2.93286	UC	GRXC12	Putative glutaredoxin-C12; Has a glutathione-disulfide oxidoreductase activity in the presence of NADPH and glutathione reductase. Reduces low molecular weight disulfides and proteins (By simila [...]
AT2G48140	2.61226	2.84625	UC	AtXYP6	Bifunctional inhibitor/lipid-transfer protein/seed storage 2S albumin superfamily protein.
AT3G01795	1.35097	2.37817	UC	- -	- -
AT3G01990	1.47048	2.466	UC	ACR6	ACT domain-containing protein ACR6; May bind amino acids.
AT3G02480	10.5066	10.1423	8.04559	F16B3.11	Late embryogenesis abundant protein (LEA) family protein.
AT3G02493	UC	UC	-2.25981	RTFL19	ROTUNDIFOLIA like 19.
AT3G02725	1.92907	2.42696	UC	- -	- -
AT3G03620	5.34379	6.41339	UC	DTX24	Protein DETOXIFICATION 24.
AT3G03800	2.22885	2.86339	UC	SYP131	Putative syntaxin-131; Vesicle trafficking protein that functions in the secretory pathway.
AT3G04175	2.26292	2.72395	UC	- -	- -
AT3G04860	UC	UC	-1.80784	T9J14.19	AT3g04860/T9J14_19.
AT3G05190	1.51072	1.64643	UC	T12H1.16	Branched-chain-amino-acid aminotransferase-like protein 1; Belongs to the class-IV pyridoxal-phosphate-dependent aminotransferase family.
AT3G05858	UC	UC	-2.84154	Q1G3M8_ARATH	Uncharacterized protein.
AT3G06120	UC	UC	-2.56075	MUTE	Transcription factor MUTE; Transcription factor. Together with FMA and SPCH, regulates the stomata formation. Required for the differentiation of stomatal guard cells, by promoting successive as [...]
AT3G06830	3.74871	3.3162	UC	PME23	Probable pectinesterase/pectinesterase inhibitor 23; Acts in the modification of cell walls via demethylesterification of cell wall pectin; In the N-terminal section; belongs to the PMEI family.
AT3G08045	2.38705	2.46501	UC	- -	- -
AT3G08455	UC	UC	-2.31017	- -	- -
AT3G09480	1.40882	1.77468	UC	F11F8.5	Histone H2B.5; Core component of nucleosome. Nucleosomes wrap and compact DNA into chromatin, limiting DNA accessibility to the cellular machineries which require DNA as a template. Histones the [...]
	4.86388	5.20098	3.33114
AT3G09940	UC	UC	-3.6013	MDAR3	Monodehydroascorbate reductase 3; Catalyzes the conversion of monodehydroascorbate to ascorbate, oxidizing NADH in the process. Required for producing sufficient ascorbate to maintain the intera [...]
AT3G10605	UC	UC	-2.11055	A0A1I9LM43	Uncharacterized protein.
AT3G10845	3.14906	2.69813	UC	F4J4Y8_ARATH	RNA-binding (RRM/RBD/RNP motifs) family protein.
AT3G13277	1.71518	1.3427	UC	- -	- -
AT3G13784	4.04123	4.88916	UC	CWINV5	Beta-fructofuranosidase, insoluble isoenzyme CWINV5.
AT3G14395	4.1504	2.69034	1.47965	Q8L923_ARATH	At3g14395.
AT3G15140	1.62906	1.52746	UC	F4B12.5	Uncharacterized exonuclease domain-containing protein At3g15140.
AT3G15670	5.65234	7.23587	UC	LEA29	Late embryogenesis abundant protein 29; Involved dehydration tolerance. Belongs to the LEA type 4 family.
AT3G16040	2.80663	1.71612	UC	Q1EBS5_ARATH	Translation machinery associated TMA7.
AT3G16120	3.42176	3.94812	UC	Q9LW74_ARATH	Dynein light chain.
AT3G16560	1.61461	1.55665	UC	MDC8.3	Probable protein phosphatase 2C 40.
AT3G17180	3.59986	4.90035	UC	SCPL33	Serine carboxypeptidase-like 33; Probable carboxypeptidase.
AT3G17630	1.625	1.81647	UC	CHX19	Cation/H(+) antiporter 19; May operate as a cation/H(+) antiporter.
AT3G20910	1.78822	2.30409	UC	NFYA9	Nuclear transcription factor Y subunit A-9; Stimulates the transcription of various genes by recognizing and binding to a CCAAT motif in promoters.
AT3G22100	2.69281	2.6986	UC	BHLH117	Transcription factor bHLH117.
AT3G22460	1.43221	1.64066	UC	OASA2	Putative inactive cysteine synthase 2; Belongs to the cysteine synthase/cystathionine beta- synthase family.
AT3G22830	6.0216	6.54622	4.55062	HSFA6b	Heat stress transcription factor A-6b; Transcriptional activator that specifically binds DNA sequence 5'-AGAAnnTTCT-3' known as heat shock promoter elements (HSE).
AT3G23260	1.68386	2.20403	UC	K14B15.17	Putative F-box protein At3g23260.
AT3G24090	2.61841	2.42105	UC	GFAT	Putative glucosamine-fructose-6-phosphate aminotransferase.
AT3G24750	4.6024	5.09426	UC	A0A1I9LQU9	Uncharacterized protein.
AT3G26742	3.40248	2.88351	UC	F4JDP4_ARATH	Uncharacterized protein.
AT3G27040	3.87652	4.11213	2.00045	MOJ10.11	MATH domain and coiled-coil domain-containing protein At3g27040.
AT3G27640	UC	UC	-2.55817	Q94C55_ARATH	Transducin/WD40 repeat-like superfamily protein.
AT3G28220	2.99158	1.99043	UC	Q9LHA6_ARATH	TRAF-like family protein.
AT3G28270	8.03119	8.2811	6.28376	MZF16.5	UPF0496 protein At3g28270.
AT3G28360	2.40438	1.75903	UC	ABCB16	ABC transporter B family member 16.
AT3G28420	UC	-1.98609	-3.48404	Q9LSJ1_ARATH	Putative membrane lipoprotein.
AT3G30305	2.88072	2.86414	UC	A0A1I9LNH2	Uncharacterized protein.
AT3G30460	4.55184	3.36918	UC	A0A1I9LPW5	RING/U-box superfamily protein.
AT3G44460	UC	UC	-1.74686	DPBF2	ABSCISIC ACID-INSENSITIVE 5-like protein 1; Could participate in abscisic acid-regulated gene expression during seed development.
AT3G44805	3.30373	2.21934	UC	F4J4A2_ARATH	TRAF-like superfamily protein.
AT3G45638	1.70212	2.41476	UC	- -	- -
AT3G46230	8.54542	7.65668	UC	HSP17.4A	17.4 kDa class I heat shock protein.
AT3G46614	UC	UC	-1.73723	- -	- -
AT3G47430	1.83687	1.66519	UC	PEX11B	Peroxisomal membrane protein 11B; Involved in peroxisomal proliferation. Promotes peroxisomal duplication, aggregation or elongation without fission.
AT3G47950	1.99053	1.5169	UC	AHA4	ATPase 4, plasma membrane-type; The plasma membrane H(+) ATPase of plants and fungi generates a proton gradient that drives the active transport of nutrients by H(+)-symport. The resulting exter [...]
AT3G49130	4.29909	5.28752	UC	T2J13.30	SWAP (Suppressor-of-White-APricot)/surp RNA-binding domain-containing protein.
AT3G50870	UC	UC	-3.30684	GATA18	GATA transcription factor 18; Transcriptional factor that specifically binds 5'-GATA-3' or 5'-GAT-3' motifs within gene promoters (including its own promoter and GATA21 promoter), thus regulatin [...]
AT3G54180	UC	UC	-2.56804	CDKB1-1	Cyclin-dependent kinase B1-1; May control G2/M (mitosis) phase progression. Plays a role in regulating seedling growth in darkness via regulation of hypocotyl cell elongation and cotyledon cell [...]
AT3G54320	2.13999	1.63221	UC	WRI1	Ethylene-responsive transcription factor WRI1; May be involved in the regulation of gene expression by stress factors and by components of stress signal transduction pathways (By similarity). Tr [...]
AT3G55610	2.98957	3.05135	UC	P5CSB	Delta-1-pyrroline-5-carboxylate synthase B; P5CS plays a key role in proline biosynthesis, leading to osmoregulation in plants; In the N-terminal section; belongs to the glutamate 5- kinase fami [...]
AT3G56300	UC	UC	-2.03459	F18O21_260	Cysteine--tRNA ligase 1, cytoplasmic.
AT3G56870	UC	-1.9486	-3.19182	Q5XVA1_ARATH	Uncharacterized protein.
AT3G57010	3.57915	4.42911	UC	SSL8	Protein STRICTOSIDINE SYNTHASE-LIKE 8.
AT3G57520	1.77835	2.20999	UC	RFS2	Probable galactinol--sucrose galactosyltransferase 2; Transglycosidase operating by a ping-pong reaction mechanism. Involved in the synthesis of raffinose, a major soluble carbohydrate in seeds, [...]
AT3G61450	4.40584	3.39612	UC	SYP73	Syntaxin-73; Vesicle trafficking protein that functions in the secretory pathway.
AT3G62040	2.78278	3.06989	UC	F4IX29_ARATH	Haloacid dehalogenase-like hydrolase (HAD) superfamily protein.
AT3G62060	UC	UC	-2.02034	PAE6	Pectin acetylesterase 6; Hydrolyzes acetyl esters in homogalacturonan regions of pectin. In type I primary cell wall, galacturonic acid residues of pectin can be acetylated at the O-2 and O-3 po [...]
AT4G00890	UC	UC	-2.39196	A_TM018A10.5	Proline-rich family protein.
AT4G01030	UC	UC	-2.27436	PCMP-H65	Pentatricopeptide repeat-containing protein At4g01030, mitochondrial.
AT4G01790	1.66689	2.64432	UC	T7B11.5	Ribosomal protein L7Ae/L30e/S12e/Gadd45 family protein.
AT4G02780	UC	UC	-1.88029	GA1	Ent-copalyl diphosphate synthase, chloroplastic; Catalyzes the conversion of geranylgeranyl diphosphate to the gibberellin precursor ent-copalyl diphosphate.
AT4G03875	UC	UC	-2.31186	- -	- -
AT4G05100	1.6349	1.995	UC	MYB74	Transcription factor MYB74; Probable transcription factor that may function in salt stress response.
AT4G07385	1.71991	2.53685	UC	- -	- -
AT4G07395	2.22462	2.0105	UC	- -	- -
AT4G07995	2.068	2.10101	UC	A0A1P8B936	Uncharacterized protein.
AT4G09060	UC	UC	-2.89466	F23J3.90	Uncharacterized protein.
AT4G09920	1.7241	1.07352	UC	T5L19.50	F-box protein At4g09920.
AT4G12400	2.90924	4.04324	UC	HOP3	Hsp70-Hsp90 organizing protein 3; Mediates the association of the molecular chaperones HSP70 and HSP90. Mediates nuclear encoded chloroplast preproteins binding to HSP90 prior to chloroplastic s [...]
AT4G12410	3.79834	2.86653	UC	T4C9.250	SAUR-like auxin-responsive protein family.
AT4G12430	2.51613	3.35104	UC	TPPF	Probable trehalose-phosphate phosphatase F; Removes the phosphate from trehalose 6-phosphate to produce free trehalose. Trehalose accumulation in plant may improve abiotic stress tolerance (By s [...]
AT4G12480	-1.6707	UC	-4.98832	EARLI1	Lipid transfer protein EARLI 1; Probable lipid transfer protein (LTP). May improve freezing survival. Seems to control the flowering process and lignin synthesis. Has an auxiliary role for germi [...]
AT4G12500	UC	UC	-5.09962	T1P17.90	pEARLI1-like lipid transfer protein 3; Probable lipid transfer protein (LTP). May improve freezing survival.
AT4G12545	UC	UC	-2.44421	AIR1B	Putative lipid-binding protein AIR1B.
AT4G12580	7.67894	7.90157	5.34264	T1P17.170	At4g12580.
AT4G12740	UC	UC	-2.15141	MYH	Adenine DNA glycosylase; Involved in oxidative DNA damage repair. Initiates repair of A*oxoG to C*G by removing the inappropriately paired adenine base from the DNA backbone. Possesses both aden [...]
AT4G13235	UC	UC	-2.00294	EDA21	Defensin-like protein 37.
AT4G14120	UC	UC	-2.55676	Dl3100W	Uncharacterized protein.
AT4G14700	UC	UC	-2.23386	ORC1A	Origin of replication complex subunit 1A; Essential protein. Component of the origin recognition complex (ORC) that binds origins of replication. It has a role in both chromosomal replication an [...]
AT4G15200	UC	UC	-2.27847	- -	- -
AT4G15390	UC	UC	-1.73723	dl3740c	HXXXD-type acyl-transferase family protein.
AT4G15530	1.4678	1.8325	UC	PPDK	Pyruvate, phosphate dikinase 1, chloroplastic; Formation of phosphoenolpyruvate. May be involved in regulating the flux of carbon into starch and fatty acids of seeds and in the remobilization o [...]
AT4G17280	2.11172	2.58775	UC	dl4675c	Cytochrome b561 and DOMON domain-containing protein At4g17280; May act as a catecholamine-responsive trans-membrane electron transporter.
AT4G17920	UC	UC	-3.66725	ATL29	RING-H2 finger protein ATL29; Belongs to the RING-type zinc finger family. ATL subfamily.
AT4G18580	1.34078	1.6344	UC	F28J12.240	At4g18580.
AT4G19230	2.59735	3.60627	UC	CYP707A1	Abscisic acid 8'-hydroxylase 1; Involved in the oxidative degradation of abscisic acid. Plays an important role in determining abscisic acid levels in dry seeds and in the control of postgermina [...]
AT4G20350	2.30859	1.35087	UC	F9F13.6	Oxidoreductase.
AT4G21060	1.98735	1.99411	UC	GALT2	Hydroxyproline O-galactosyltransferase GALT2; Possesses hydroxyproline O-galactosyltransferase activity. Transfers galactose from UDP-galactose to hydroxyproline residues in the arabinogalactan [...]
AT4G21400	2.72657	1.31068	UC	CRK28	Cysteine-rich receptor-like protein kinase 28.
AT4G21680	2.84071	2.04968	UC	NPF7.2	Protein NRT1/ PTR FAMILY 7.2; Low-affinity nitrate transporter. Involved in nitrate removal from xylem sap. Not involved in oligopeptides transport.
AT4G21930	1.97371	2.09833	UC	F1N20.2	Uncharacterized protein At4g21930.
AT4G22640	UC	UC	-2.33409	T12H17.30	Bifunctional inhibitor/lipid-transfer protein/seed storage 2S albumin superfamily protein.
AT4G23540	UC	UC	-2.68903	F16G20.240	ARM repeat superfamily protein.
AT4G23680	4.42884	6.35746	UC	F9D16.150	Polyketide cyclase/dehydrase and lipid transport superfamily protein.
AT4G27010	1.7276	1.55931	UC	EMB2788	Ribosome 60S biogenesis amino-terminal protein.
AT4G27460	1.82185	1.69291	UC	CBSX5	CBS domain-containing protein CBSX5.
AT4G27670	7.04359	7.04887	UC	HSP21	Heat shock protein 21, chloroplastic; Chaperone protein required for seedling and chloroplast development under heat stress, probably by maintaining plastid-encoded RNA polymerase (PEP)-dependen [...]
AT4G27950	UC	UC	-3.47603	CRF4	Ethylene-responsive transcription factor CRF4; Component of the cytokinin signaling pathway involved in cotyledons, leaves, and embryos development. Probably acts as a transcriptional activator. [...]
AT4G27970	UC	-2.37229	-3.3933	SLAH2	S-type anion channel SLAH2; Slow, weak voltage-dependent S-type anion efflux channel involved in maintenance of anion homeostasis. Belongs to the SLAC1 S-type anion channel family.
AT4G28340	4.85946	5.21543	3.41573	F20O9.20	Pyrroline-5-carboxylate reductase.
AT4G29400	1.62443	1.8827	UC	F17A13.220	Oxidoreductase/transition metal ion-binding protein (DUF3531).
AT4G29930	UC	UC	-2.15141	BHLH27	Transcription factor bHLH27.
AT4G30560	UC	UC	-2.18871	CNGC9	Putative cyclic nucleotide-gated ion channel 9; Putative cyclic nucleotide-gated ion channel.
AT4G30830	5.31271	4.34177	3.04352	F6I18.260	GTD-binding domain-containing protein.
AT4G31240	1.378	2.05982	UC	F8F16.60	Probable nucleoredoxin 3; Probable thiol-disulfide oxidoreductase that may participate in various redox reactions.
AT4G31354	2.64604	3.4808	UC	B3H6D4_ARATH	Uncharacterized protein.
AT4G31380	UC	UC	-2.9695	FLP1	Flowering-promoting factor 1-like protein 1; Modulates the competence to flowering of apical meristems.
AT4G31830	7.99256	8.95507	UC	F11C18.30	Transmembrane protein.
AT4G32445	1.28662	1.96174	UC	- -	- -
AT4G32870	1.61793	1.81533	UC	T16I18.80	Polyketide cyclase/dehydrase and lipid transport superfamily protein.
AT4G32990	UC	UC	-2.83433	F26P21.110	Probable cytosolic iron-sulfur protein assembly protein CIAO1 homolog; Essential component of the cytosolic iron-sulfur (Fe/S) protein assembly machinery. Required for the maturation of extramit [...]
AT4G33610	2.80692	2.29691	UC	T16L1.100	Glycine-rich protein.
AT4G33780	1.73294	1.39331	UC	T16L1.270	ATP phosphoribosyltransferase regulatory subunit.
AT4G36620	UC	UC	-3.24322	GATA19	GATA transcription factor 19; Transcriptional regulator that specifically binds 5'-GATA-3' or 5'-GAT-3' motifs within gene promoters. Regulates both flower and shoot apical meristem (SAM) develo [...]
AT4G36880	UC	UC	-1.73723	GCP1-2	Germination-specific cysteine protease 1; Probable thiol protease.
AT4G37730	1.97624	3.06179	UC	bZIP7	BZIP transcription factor-like protein.
AT4G39700	2.79211	3.70529	UC	HIPP23	Heavy metal-associated isoprenylated plant protein 23; Heavy-metal-binding protein; Belongs to the HIPP family.
AT4G39730	1.49308	1.71112	UC	PLAT1	PLAT domain-containing protein 1; Positive regulator of abiotic stress tolerance involved in the regulation of plant growth. May be a downstream target of the abscisic acid (ABA) signaling pathw [...]
AT4G40020	2.09953	3.25546	UC	T5J17.190	Myosin heavy chain-related protein.
AT5G00765	1.79752	2.2374	UC	- -	- -
AT5G01120	UC	UC	-2.666	F7J8.100	Uncharacterized protein F7J8_100.
AT5G01300	8.20884	8.71814	6.83713	T10O8.10	PEBP (Phosphatidylethanolamine-binding protein) family protein.
AT5G01330	UC	UC	-2.43365	PDC3	Pyruvate decarboxylase 3; Belongs to the TPP enzyme family.
AT5G01940	2.28147	1.94606	UC	T20L15.210	Eukaryotic translation initiation factor 2B family protein / eIF-2B family protein.
AT5G03700	UC	UC	-1.94296	F17C15.120	PAN domain-containing protein At5g03700.
AT5G04010	3.91588	5.95284	UC	NSFBx	Probable F-box protein At5g04010.
AT5G05220	7.35344	7.71108	UC	K18I23.2	AT5g05220/K18I23_2.
AT5G06825	2.40693	3.56018	UC	- -	- -
AT5G07095	2.97518	3.06906	UC	- -	- -
AT5G07450	2.97425	2.335	UC	CYCU4-2	Cyclin-U4-2; Belongs to the cyclin family. Cyclin U/P subfamily.
AT5G08020	UC	UC	-2.79487	RPA1B	Replication protein A 70 kDa DNA-binding subunit B; Component of the replication protein A complex (RPA) required for DNA recombination, repair and replication. The activity of RPA is mediated b [...]
AT5G08712	3.18831	3.23808	UC	- -	- -
AT5G09470	UC	UC	-3.87299	PUMP6	Mitochondrial uncoupling protein 6; PUMPS are mitochondrial transporter proteins that create proton leaks across the inner mitochondrial membrane, thus uncoupling oxidative phosphorylation. This [...]
AT5G09520	2.73491	3.58287	UC	PELPK2	Protein PELPK2.
AT5G09530	3.32447	2.45581	UC	PELPK1	Protein PELPK1; Positive regulator of germination and plant growth.
AT5G10130	UC	UC	-2.80474	DFC	Protein DOWNSTREAM OF FLC; Part of a three-gene cluster containing FLC, UFC and DFC, which is coordinately regulated in response to vernalization. Not regulated by FLX.
AT5G10260	UC	UC	-3.25984	RABH1E	Ras-related protein RABH1e; Protein transport. Regulator of membrane traffic from the Golgi apparatus towards the endoplasmic reticulum (ER) (By similarity). Belongs to the small GTPase superfam [...]
AT5G10890	UC	UC	-2.59781	PL1	Protein POLAR-like 1; Acts as a stomatal lineage scaffold which regulates subcellular localization and transient polarization of kinases (e.g. ASK7/BIN2 and ASK3/SK12) involved in asymmetric cel [...]
AT5G12340	UC	UC	-2.61979	Q1PDX4_ARATH	DUF4228 domain protein.
AT5G13370	2.76652	2.69299	UC	GH3.15	Indole-3-acetic acid-amido synthetase GH3.15; Indole-3-acetic acid-amido (IAA) synthetase that catalyzes the conjugation of amino acids to auxin specifically using the auxin precursor indole-3-b [...]
AT5G13930	1.06886	1.87302	UC	CHS	Chalcone synthase; The primary product of this enzyme is 4,2',4',6'- tetrahydroxychalcone (also termed naringenin-chalcone or chalcone) which can under specific conditions spontaneously isomeriz [...]
AT5G13990	UC	UC	-2.91945	EXO70C2	Exocyst subunit Exo70 family protein; Component of the exocyst complex.
AT5G14820	2.02345	1.40291	UC	T9L3_120	Pentatricopeptide repeat-containing protein At5g14820, mitochondrial.
AT5G15240	2.38551	3.18284	UC	AVT1J	Amino acid transporter AVT1J; Belongs to the amino acid/polyamine transporter 2 family. Amino acid/auxin permease (AAAP) (TC 2.A.18.5) subfamily.
AT5G15250	4.50591	4.41501	UC	FTSH6	ATP-dependent zinc metalloprotease FTSH 6, chloroplastic; Probable ATP-dependent zinc metallopeptidase. Involved in the degradation of the light-harvesting complex of photosystem II (LHC II) dur [...]
AT5G17220	1.64078	2.80352	UC	GSTF12	Glutathione S-transferase F12; Involved in the transport and/or accumulation of both anthocyanins and proanthocyanidins (PA)s in the vacuole. Functions in the cytosol to maintain the regular acc [...]
AT5G18404	UC	UC	-3.01659	B3H712_ARATH	Uncharacterized protein.
AT5G19040	UC	UC	-1.77432	IPT5	Adenylate isopentenyltransferase 5, chloroplastic; Involved in cytokinin biosynthesis. Catalyzes the transfer of an isopentenyl group from dimethylallyl diphosphate (DMAPP) to ATP and ADP; Belon [...]
AT5G19410	2.81053	2.36022	UC	ABCG23	ABC transporter G family member 23.
AT5G21920	UC	UC	-1.87709	YLMG2	YlmG homolog protein 2, chloroplastic; Not required for the biogenesis and accumulation of native cytochrome b6 in the thylakoid membrane. Not functionally involved in the pathway for covalent b [...]
AT5G22430	UC	UC	-4.75261	MWD9.23	Pollen Ole e 1 allergen and extensin family protein.
AT5G22470	5.57748	6.15457	UC	PARP3	Protein ADP-ribosyltransferase PARP3; Involved in the base excision repair (BER) pathway, by catalyzing the poly(ADP-ribosyl)ation of a limited number of acceptor proteins involved in chromatin [...]
AT5G22550	2.53915	3.50429	UC	MQJ16.9	Transmembrane protein, putative (DUF247).
AT5G23930	2.66438	2.55757	UC	MRO11.3	Mitochondrial transcription termination factor family protein.
AT5G25770	1.93936	1.72435	UC	F18A17.20	Alpha/beta-Hydrolases superfamily protein.
AT5G26260	UC	UC	-2.98136	F9D12.8	TRAF-like family protein.
AT5G27940	1.77632	1.79711	UC	WPP3	WPP domain-containing protein 3; Regulates the mitotic activity in roots.
AT5G28340	1.1882	1.76127	UC	T8M17.110	Tetratricopeptide repeat (TPR)-like superfamily protein.
AT5G28380	1.10134	1.82408	UC	F21B23.50	Tetratricopeptide repeat (TPR)-like superfamily protein.
AT5G37260	4.68144	5.29903	3.23712	RVE2	Protein REVEILLE 2; Positive regulator for cold-responsive gene expression and cold tolerance. Part of a regulatory feedback loop that controls a subset of the circadian outputs and modulates th [...]
AT5G37300	2.28328	2.54182	UC	WSD1	O-acyltransferase WSD1; Bifunctional wax ester synthase/diacylglycerol acyltransferase. Involved in cuticular wax biosynthesis. In the N-terminal section; belongs to the long-chain O- acyltransf [...]
AT5G37670	1.6588	2.47883	UC	HSP15.7	15.7 kDa heat shock protein, peroxisomal; Possesses chaperone activity; Belongs to the small heat shock protein (HSP20) family.
AT5G37750	1.85558	2.69919	UC	K12B20.23	Chaperone DnaJ-domain superfamily protein.
AT5G39220	UC	UC	-2.65556	K3K3.12	Alpha/beta-Hydrolases superfamily protein.
AT5G39660	1.93837	2.08359	UC	CDF2	Cyclic dof factor 2; Transcription factor that binds specifically to a 5'-AA[AG]G- 3' consensus core sequence (By similarity). Regulates a photoperiodic flowering response. Transcriptional repre [...]
AT5G39720	1.55994	3.02525	UC	AIG2LA	AIG2-like protein A; Putative gamma-glutamylcyclotransferase. Belongs to the gamma-glutamylcyclotransferase family.
AT5G40350	UC	UC	-2.44421	MYB24	Transcription factor MYB24; Transcription factor acting redundantly with MYB21 and MYB57 to control stamen filament elongation in the late developed flowers. Contributes with MYB21 to induction [...]
AT5G41650	1.16401	2.06683	UC	MBK23.15	Lactoylglutathione lyase / glyoxalase I family protein.
AT5G41740	UC	UC	-1.58085	MUF8.2	Disease resistance protein (TIR-NBS-LRR class) family.
AT5G42510	4.15539	4.70837	UC	DIR1-2	Dirigent protein 1; Dirigent proteins impart stereoselectivity on the phenoxy radical-coupling reaction, yielding optically active lignans from two molecules of coniferyl alcohol in the biosynth [...]
AT5G43400	2.67795	2.17391	UC	MWF20.9	AT5g43400/MWF20_9.
AT5G44310	6.92128	7.85313	UC	K9L2.7	Late embryogenesis abundant protein (LEA) family protein.
AT5G44380	UC	UC	-3.12234	K9L2.18	Berberine bridge enzyme-like 24.
AT5G44420	UC	-5.60628	-8.20098	PDF1.2A	Defensin-like protein 16; Confers broad-spectrum resistance to pathogens. Has antifungal activity in vitro; Belongs to the DEFL family.
AT5G44430	UC	-3.52554	-7.06433	PDF1.2C	Defensin-like protein 17; Confers broad-spectrum resistance to pathogens; Belongs to the DEFL family.
AT5G44670	1.40903	1.94843	UC	GALS2	Galactan beta-1,4-galactosyltransferase GALS2; Involved in the biosynthesis of beta-1,4-galactan. Beta-1,4- galactans are abundant polysaccharides in plant cell walls and are found as side-chain [...]
AT5G46085	2.14541	1.61026	UC	A0A1P8B9F1	Uncharacterized protein.
AT5G47810	1.69039	2.22937	UC	PFK2	ATP-dependent 6-phosphofructokinase 2; Catalyzes the phosphorylation of D-fructose 6-phosphate to fructose 1,6-bisphosphate by ATP, the first committing step of glycolysis; Belongs to the phosph [...]
AT5G48060	UC	UC	-2.46731	MDN11.14	C2 calcium/lipid-binding plant phosphoribosyltransferase family protein.
AT5G51760	3.16488	4.77909	UC	AHG1	Probable protein phosphatase 2C 75; Negative regulator of abscisic acid (ABA) responses during seed germination; Belongs to the PP2C family.
AT5G53660	2.69316	3.76228	UC	GRF7-2	Growth-regulating factor 7; Transcription activator that plays a role in the regulation of cell expansion in leaf and cotyledons tissues. Component of a network formed by miR396, the GRFs and th [...]
AT5G53710	6.38392	7.4647	5.16601	MGN6.6	Uncharacterized protein.
AT5G53742	2.60155	2.21552	UC	A8MRZ6_ARATH	Egg cell-secreted-like protein (DUF1278).
AT5G53902	2.52763	2.20472	UC	- -	- -
AT5G54030	UC	UC	-1.91153	K19P17.20	Cysteine/Histidine-rich C1 domain family protein.
AT5G54910	1.36258	1.69018	UC	RH32	DEAD-box ATP-dependent RNA helicase 32; Belongs to the DEAD box helicase family. DDX10/DBP4 subfamily.
AT5G55380	-0.98162	UC	-2.36717	AT1	Probable long-chain-alcohol O-fatty-acyltransferase 1; Catalyzes the final step in the synthesis of long-chain linear esters (waxes).
AT5G55830	UC	-2.33618	-3.64694	LECRKS7	Probable L-type lectin-domain containing receptor kinase S.7; Involved in resistance response to the pathogenic oomycetes Phytophthora infestans and Phytophthora capsici. In the N-terminal secti [...]
AT5G56300	UC	UC	-2.31427	GAMT2	Gibberellic acid methyltransferase 2; Methylates the carboxyl group of several gibberellins (GAs). Substrate preference is GA4 > GA34 > GA9 > GA3 > GA1 > GA51 > GA20. No activity with diterpenes [...]
AT5G56490	UC	UC	-3.15087	GULLO4	Probable L-gulonolactone oxidase 4; May be involved in the biosynthesis of ascorbic acid. Belongs to the oxygen-dependent FAD-linked oxidoreductase family.
AT5G58320	1.20459	1.95422	UC	NET4A	Protein NETWORKED 4A; Plant-specific actin binding protein. Associates with F-actin at the tonoplast. May be part of a membrane-cytoskeletal adapter complex.
AT5G58380	1.59718	2.14439	UC	CIPK10	CBL-interacting serine/threonine-protein kinase 10; CIPK serine-threonine protein kinases interact with CBL proteins. Binding of a CBL protein to the regulatory NAF domain of CIPK protein lead t [...]
AT5G58660	3.69799	2.89343	UC	MZN1.11	2-oxoglutarate (2OG) and Fe(II)-dependent oxygenase superfamily protein; Belongs to the iron/ascorbate-dependent oxidoreductase family.
AT5G59720	1.42822	2.13149	UC	HSP18.1	18.1 kDa class I heat shock protein.
AT5G59760	3.0338	3.13187	UC	MTH12.3	Uncharacterized protein.
AT5G59845	2.47024	3.26542	UC	GASA10	Gibberellin-regulated protein 10; Gibberellin-regulated protein that may function in hormonal controlled steps of development such as seed germination, flowering and seed maturation; Belongs to [...]
AT5G59865	UC	UC	-2.43239	A0A178ULY3	Glycine-rich RNA-binding-like protein.
AT5G61850	1.16239	2.08377	UC	LFY	Protein LEAFY; Probable transcription factor that promotes early floral meristem identity in synergy with APETALA1. Is required subsequently for the transition of an inflorescence meristem into [...]
AT5G62530	2.51311	2.5981	UC	ALDH12A1	Delta-1-pyrroline-5-carboxylate dehydrogenase 12A1, mitochondrial; Plays a role in the inhibition of programmed cell death by converting the toxic proline catabolism intermediate (s)-1-pyrroline [...]
AT5G63450	UC	UC	-2.85371	CYP94B1	Cytochrome P450 94B1; Hydroxylase involved in the oxidation of the plant hormone jasmonoyl-L-isoleucine (JA-Ile), a bioactive phytohormone of the jasmonate-mediated signaling pathway. Converts J [...]
AT5G64060	UC	UC	-2.42666	NAC103	NAC domain containing protein 103.
AT5G64870	UC	UC	-2.15803	FLOT3	Flotillin-like protein 3; May act as a scaffolding protein within caveolar membranes, functionally participating in formation of caveolae or caveolae-like vesicles.
AT5G65613	UC	UC	-2.29966	A0A178UFC4	Uncharacterized protein.
AT5G65830	2.22219	1.66412	UC	RLP57	Receptor-like protein 57.
AT5G66558	2.21811	1.58997	UC	- -	- -
ATMG00590	1.70604	1.25328	UC	M590_ARATH	Uncharacterized mitochondrial cytochrome b-like protein AtMg00590; Belongs to the cytochrome b family.
