# Supplementary material
Source: Research Square preprint supplement (doi:10.21203/rs.3.rs-8969427/v1)
Supplement: Supplementary file 5 [file ae56ec289d04caf17c15704d.docx]

**ALKBH10B mediated epitranscriptomic regulation enhances drought tolerance of *Arabidopsis thaliana* via hormonal cross-talk and sustained photosynthesis**

**Yasira Shoaib1, Rongpeng Han2, Sabarna Bhattacharyya1,Alexandra Finkenauer1, Katharina Gutbrod3, Peter Dörmann3, Hunseung Kang2*, Ute C. Vothknecht1*****, and Fatima Chigri1**

1 Institute for Cellular and Molecular Botany (IZMB), University of Bonn, Kirschallee 1, 53115 Bonn, Germany

2 Department of Applied Biology, College of Agriculture and Life Sciences, Chonnam National University, Gwangju 61186, Korea

3 Institute of Molecular Physiology and Biotechnology of Plants (IMBIO), University of Bonn, Karlrobert-Kreiten-Straße 13, 53115, Bonn, Germany

***Correspondence:**

Ute C. Vothknecht, vothknecht@uni-bonn.de, Orcid ID 0000-0002-8930-0127

Hunseung Kang, hskang@chonnam.ac.kr


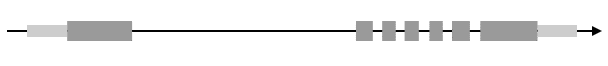


**Fig. S1 Characterisation of *ALKBH10B* transgenic lines and cloning of a p*ALKBH10B*::FLUC construct. A** Schematic representation of the T-DNA insertion in the *ALKBH10B* mutant (Salk_004215c) **B** Transcript abundance in *alkbh10b-1* null mutant and 35S:ALKBH10B overexpression lines (OX-1) using RT-qPCR. **C** Schematic representation of the *pALKBH10B::FLUC* cassette in the LB: Left border; RB: Right border. *pro10B:* 1000 bps upstream of the start codon of *ALKBH10B*

Relative expression

WT

*10b-1*

OX-1

***pro10B***

LB

KpnI

ApaI

RB

***Luciferase***

***BastaR***

A

B

(Salk_004215c)

*AT4G02940*

C

5‘

3‘

*alkbh10b-1*

*(10b-1)*


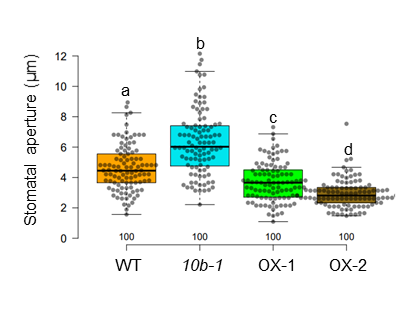

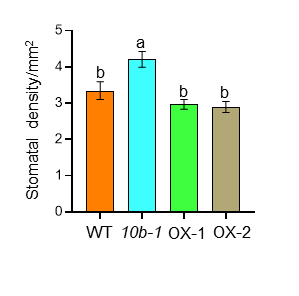

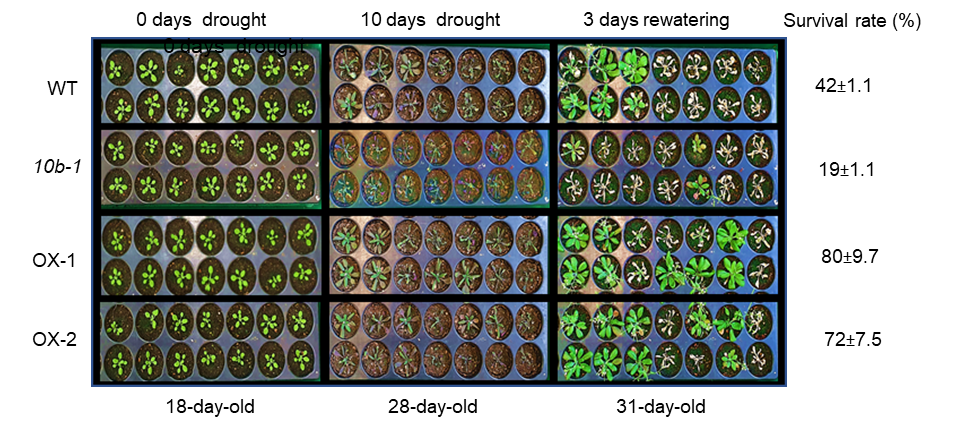


C

**Fig. S2 Phenotyping of WT, *alkbh10b-1,* and two independent lines of 35S:ALKBH10B (OX-1 and OX-2)** **under drought stress. A** Drought stress was applied to 18-day-old plants by with-holding water for 10 days and survival rate was measured after 3 days of rewatering. **B** Stomatal density and **c** aperture measured in 21-days old plants under control conditions. Values are the means ± S.E of three biological replicates each consisting of two technical replicates. Data were analysed through one-way analysis of variance (ANOVA) (P<0.05), followed by Multiple comparison analysis (Tukey‘s honest significant difference [HSD test]).

B

A

B

A

a

a

a

a

a

a

Control

Drought

SA-content

ng/g FW

WT

OX-1

*alkbh10b-1*

a

a

a

6h

3h

24h

**Fig. S3 Effect of salicylic acid (SA) on the expression of *ALKBH10B* and analysis of its content in WT, *alkbh10b-1* and OX-1. A** Relative expression of *ALKBH10B* in WT plants grown on ½ MS plates for 21 days and treated with either water (mock) or 50 µM SA for 3, 6 and 24 hours quantified through RT-qPCR. Data represent mean ± SE of 3 biological replicates (n=3). **B** Analysis of SA levels in WT, *alkbh10b-1* and OX-1 grown under control and drought stress conditions. Data represent mean ± SE of 5 biological replicates (n=5) each containing pooled extracts from 2 plants. The data were analysed through two-way Anova followed by Tukey Post-Hoc HSD test (P< 0.05)

Relative expression

*ALKBH10B*

b

a

a

50 µM SA

Mock

| **Samples** | **Replicates** | **Total reads** | **Aligned reads** | **Aligned reads (%)** |
| --- | --- | --- | --- | --- |
| WT C | 1 | 9651540 | 8160377 | 84.55 |
|  | 2 | 10239533 | 8941160 | 87.32 |
|  | 3 | 10152705 | 8852143 | 87.19 |
| *alkbh10b-1* C | 1 | 9851158 | 8618778 | 87.49 |
|  | 2 | 8323243 | 7722258 | 84.93 |
|  | 3 | 9067730 | 7911594 | 87.25 |
| OX-1 C | 1 | 9562982 | 8284411 | 86.63 |
|  | 2 | 8627557 | 7429189 | 86.11 |
|  | 3 | 10828200 | 9645760 | 89.08 |
| WT D | 1 | 10159554 | 8678291 | 85.42 |
|  | 2 | 9144232 | 7872269 | 86.09 |
|  | 3 | 10813648 | 9018582 | 83.40 |
| *alkbh10b-1* D | 1 | 10469305 | 9008836 | 86.05 |
|  | 2 | 11204970 | 9710227 | 86.66 |
|  | 3 | 8218264 | 7009357 | 85.29 |
| OX-1 D | 1 | 9147531 | 7876938 | 86.11 |
|  | 2 | 8747080 | 7514616 | 85.91 |
|  | 3 | 10023597 | 87065493 | 86.85 |

**Table S2. Summary of total reads and aligned reads in RNA seq samples under control and drought conditions**. For each treatment, three biological replicates were performed and each contained RNA pooled from two individual plants**.** After quality control, reads were aligned against the TAIR 10 Arabidopsis genome assembly.
