# Supplementary material
Source: Research Square preprint supplement (doi:10.21203/rs.3.rs-8969427/v1)
Supplement: Supplementary file 6 [file e6ed2e3d7b454f0ab1b0a231.xlsx]

## Sheet: Legend
	Supplementary Table S1: List of primers used for cloning, RT-qPCR and m6A IP-qPCR

## Sheet: Primers sequence
	Name	Forward Primer	Reverse Primer
Molecular cloning
	ALKBH10B Promoter	ATATGGTACCTTTATAAAAAGT	ATATGGGCCCCGGCGTAGTATCCGGCGA
RT-qPCR
	Name	Forward Primer	Reverse Primer
	MTA	AGAAACAAGCCGGAAGCCAGAC	TGGTTCCCAAGTGATAGCCATCCG
	MTB	GCTGAAGAGCCTCCTTATGGTTCG	CCAGCCAGCTCGAATATTGTGG
	FIP37	GAAGTCAGCTGTTCGCGATTTG	AACAACCTCCTCGCCTGCATTG
	VIR	TGTGCTGAAGTTCTGCCAGGTG	TCAGGTCTTTGAAAGCGCCAAG
	HAKAI	TGCAATCTATGGTCGTCTGATTCC	ATCACTGCGAGCACATTCAAGG
	ECT2	AGAAACAAGCCGGAAGCCAGAC	TGGTTCCCAAGTGATAGCCATCCG
	ECT3	GCTTCCCTGTTAAGTGGCATTTC	TGCCTTGCTCGAGCTTTACTTC
	ECT4	AGCAACAATCCCAGAAGCAGGTC	TCTTCATCTTCCCACCGTATGCAG
	FLK	TGCCGTGCAGCTTATTCAGAAC	TGGTGCTACAGTTTGAGGCTGTG
	ALKBH10B	AAACGGGAAGCTTGCAGGTGAG	TCCGCCTTGACATGACCAAAGATG
	ALKBH9B	ATCCGTTCTCTTGACCCAGCAC	TTCCACCACTGAACAAGAACCAG
	ALKBH9C	CGTAGAGGAGAATTGCGAGAGC	CATCTCCACGTTGAAGGATTCCG
	RD29A	CGGAGGAAATTATTCCACCAGGGA	ACAGAATGAGCCGGTGCATCGTG
	ACTIN2	TGCCAATCTACGAGGGTTTC	CTTACAATTTCCCGCTCTGC	Reference gene
	TUBULIN2	TGGGAACTCTGCTCATATCT	TGGGAACTCTGCTCATATCT	Reference gene
	LHCB4.1	ACAGTGAGGTGTTCGGAATCCAG	CATCTACAAGCTCCACCTTGCC
	PSBQ-2	ACACCGTTATCTCCGCTAAGCC	TGATCTCGCCGCATAGTCCAAG
	PSBO1	ACGTGAAGAACACTGCCGCTTC	TCTCCGGCTTGCTCTTTGTCAC
m6A-IP-qPCR
	Name	Forward Primer	Reverse Primer	m6A position	m6A locus
	COR15B	GGCGGCTGAGTTCGTAGAG	CAGCTCTTCATTTCAAATGGTGA	3’UTR	Chr2: 17708592-17708961
	LOX2	TGTCTACCGAATCAAACACAGC	CATCGTCTTCTGAGGTTTGGA	Exon	Chr3: 16528695-16529352
	VSP2	GAAGAGTCTCGTGAAGAAAGGAT	AAGGGGACAATGCGATGAA	Stop codon	Chr5: 8500624-8501037
	CIPK20	AAGATGCAAAAGAGATAGTGTCG	TTCAAATATCTCAACATCAATCGCA	Stop codon	Chr5: 18587186-18587334
	CYP707A1	GAAAGGTTACAATTCGATGCCAGT	GTTGTGTGAGGAACCGTTCTG	Exon	Chr4: 10521988-10522525
	CML20	CTGAGATACGAGAGATGGTTGAAG	CAACAACCTTTCTAGTTACCACCA	Stop codon	Chr3: 18675155-18675653
	LHCB2.4	CAACTGTCCCTATGCTAAAACTGA	TGAAAGTTTATGCAGTGTTTTGGTAG	3’UTR	Chr3: 10257299-10257489
	LHCB4.1	GGCTTTTGCTTGTTTGGTTTATT	CATAACTAATGGGTCGGTCTTGT	Stop codon	Chr5: 209807-209962
	PSAD2	TCTCATCTACCCTCTCGTTGTC	AGTGGTTGTTATGGCGGG	Start codon	Chr1: 754142-754241
	PNSL3	AAGAGGTAATGACCAGAATGGCAT	CCACAGAGTTATCAACCATGTAGG	Stop codon	Chr3: 169083-169249
	PSBQ2	GCGTTGTAATCTGTTGATGTCG	TCGAGGACGAATATATAATGTTTTGC	Stop codon	Chr4: 2672380-2672532
	PSBO1	CAGCCTCTCTCCAATCCA	TGACAGCGTCGGAGCAT	Start codon	Chr5: 26568669-26568812
